# Supplementary material for: Theoretical design and characterization of new terpolymer donors based on PTB7Ir for high-efficiency triplet-material-based organic photovoltaics
Source: Royal Society of Chemistry journal article supplement (doi:10.1039/d2ra00033d), 2022-01-01
Supplement: d2ra00033d1.pdf [file d2ra00033d1.pdf]

## Electronic Supplementary Information

### **Theoretical design and characterization of new terpolymer donors based on PTB7Ir for high-efficiency triplet-material-based organic photovoltaics**

Shuangbao Li,<sup>\*a</sup> Yang Chen,<sup>a</sup> Zhen Li,<sup>a</sup> Jianpo Zhang,<sup>a</sup> Jie Chen,<sup>a</sup> Yun Geng<sup>b</sup> and Zhongmin Su<sup>\*b, c, d</sup>

*a.School of Chemical and Pharmaceutical Engineering, Jilin Institute of Chemical Technology, Jilin, 132022, P. R. China.*

*b.Institute of Functional Material Chemistry, Faculty of Chemistry, Northeast Normal University, Changchun, 130024, P. R. China.*

*c.School of Chemistry and Environmental Engineering, Changchun University of Science and Technology, Changchun, 130022, P. R. China.*

*d.Jilin Provincial Science and Technology Innovation Center of Optical Materials and Chemistry, Changchun, 130022, P. R. China*

\*Corresponding author: Dr. Shuangbao Li; Prof. Zhongmin Su

School of Chemical and Pharmaceutical Engineering,

Jilin Institute of Chemical Technology,

Jilin, 132022, P. R. China

E-mail Address: lishb997@nenu.edu.cn

zmsu@nenu.edu.cn

# CONTENTS

|                                                                                                                                                                                                                                                                                                                                        |            |
|----------------------------------------------------------------------------------------------------------------------------------------------------------------------------------------------------------------------------------------------------------------------------------------------------------------------------------------|------------|
| <b>Section S1. A comparative analysis of intermolecular charge transfer properties</b>                                                                                                                                                                                                                                                 | (Page S1)  |
| <b>Fig. S1.</b> Optimized interface geometries of <b>Configuration-1</b> (a), and <b>Configuration-2</b> (b), respectively.                                                                                                                                                                                                            | (Page S1)  |
| <b>Fig. S2.</b> CDD maps of $^1\text{CT}_1$ of <b>Configuration-1</b> (a), $^1\text{CT}_1$ of <b>Configuration-2</b> (b), $^3\text{CT}_1$ of <b>Configuration-1</b> (c) and $^3\text{CT}_1$ of <b>Configuration-2</b> (d), where the violet and turquoise colors refer to the increase and decrease in electron density, respectively. | (Page S1)  |
| <b>Table S1.</b> Calculated energy level values of $E_{\text{Coul}}$ , $E_{\text{CT1}}$ and $-\Delta G_{\text{CRT}}$ for <b>Configuration-1</b> and <b>Configuration-2</b> , respectively.                                                                                                                                             | (Page S2)  |
| <b>Section S2. List of Figures</b>                                                                                                                                                                                                                                                                                                     |            |
| <b>Fig. S3.</b> Schematic illustration of twist angles between donor and acceptor moieties of <b>2</b> and <b>6-11</b> . The green dotted boxes represent the highlights.                                                                                                                                                              | (Page S2)  |
| <b>Fig. S4.</b> Hole-electron pairs of NTOs in $S_1$ and $T_1$ states of <b>1-3</b> and <b>5-11</b> .                                                                                                                                                                                                                                  | (Page S3)  |
| <b>Section S3. List of Tables</b>                                                                                                                                                                                                                                                                                                      |            |
| <b>Table S2.</b> The HOMO energy levels ( $E_{\text{HOMO}}$ ) of PTB7Ir and <b>1-11</b> molecules calculated at the B3LYP/6-31G(d) (LANL2DZ for Ir atom) level.                                                                                                                                                                        | (Page S4)  |
| <b>Table S3.</b> Calculated vertical excitation energies ( $E_g$ ), oscillator strengths ( $f$ ) and excitation characters of $S_1$ states for PTB7Ir and <b>1-11</b> at the B3LYP/6-31G(d) (LANL2DZ for Ir atom) level in o-dichlorobenzene solvent.                                                                                  | (Page S4)  |
| <b>Section S4. Coordinates of molecules</b>                                                                                                                                                                                                                                                                                            |            |
| <b>Table S4.</b> The coordinate of PTB7Ir.                                                                                                                                                                                                                                                                                             | (Page S4)  |
| <b>Table S5.</b> The coordinate of <b>1</b> .                                                                                                                                                                                                                                                                                          | (Page S7)  |
| <b>Table S6.</b> The coordinate of <b>2</b> .                                                                                                                                                                                                                                                                                          | (Page S10) |
| <b>Table S7.</b> The coordinate of <b>3</b> .                                                                                                                                                                                                                                                                                          | (Page S13) |
| <b>Table S8.</b> The coordinate of <b>4</b> .                                                                                                                                                                                                                                                                                          | (Page S15) |
| <b>Table S9.</b> The coordinate of <b>5</b> .                                                                                                                                                                                                                                                                                          | (Page S18) |
| <b>Table S10.</b> The coordinate of <b>6</b> .                                                                                                                                                                                                                                                                                         | (Page S21) |
| <b>Table S11.</b> The coordinate of <b>7</b> .                                                                                                                                                                                                                                                                                         | (Page S23) |
| <b>Table S12.</b> The coordinate of <b>8</b> .                                                                                                                                                                                                                                                                                         | (Page S26) |
| <b>Table S13.</b> The coordinate of <b>9</b> .                                                                                                                                                                                                                                                                                         | (Page S29) |
| <b>Table S14.</b> The coordinate of <b>10</b> .                                                                                                                                                                                                                                                                                        | (Page S31) |
| <b>Table S15.</b> The coordinate of <b>11</b> .                                                                                                                                                                                                                                                                                        | (Page S34) |
| <b>Table S16.</b> The coordinate of PTB7Ir/PC <sub>71</sub> BM.                                                                                                                                                                                                                                                                        | (Page S37) |
| <b>Table S17.</b> The coordinate of PTB7Ir/PC <sub>71</sub> BM calculated by PBE0-D2 functional.                                                                                                                                                                                                                                       | (Page S40) |
| <b>Table S18.</b> The coordinate of <b>1</b> /PC <sub>71</sub> BM.                                                                                                                                                                                                                                                                     | (Page S44) |
| <b>Table S19.</b> The coordinate of <b>2</b> /PC <sub>71</sub> BM.                                                                                                                                                                                                                                                                     | (Page S48) |
| <b>Table S20.</b> The coordinate of <b>3</b> /PC <sub>71</sub> BM.                                                                                                                                                                                                                                                                     | (Page S52) |
| <b>Table S21.</b> The coordinate of <b>4</b> /PC <sub>71</sub> BM.                                                                                                                                                                                                                                                                     | (Page S56) |
| <b>Table S22.</b> The coordinate of <b>5</b> /PC <sub>71</sub> BM.                                                                                                                                                                                                                                                                     | (Page S60) |
| <b>Table S23.</b> The coordinate of <b>6</b> /PC <sub>71</sub> BM.                                                                                                                                                                                                                                                                     | (Page S64) |
| <b>Table S24.</b> The coordinate of <b>7</b> /PC <sub>71</sub> BM.                                                                                                                                                                                                                                                                     | (Page S67) |
| <b>Table S25.</b> The coordinate of <b>8</b> /PC <sub>71</sub> BM.                                                                                                                                                                                                                                                                     | (Page S71) |
| <b>Table S26.</b> The coordinate of <b>9</b> /PC <sub>71</sub> BM.                                                                                                                                                                                                                                                                     | (Page S75) |
| <b>Table S27.</b> The coordinate of <b>10</b> /PC <sub>71</sub> BM.                                                                                                                                                                                                                                                                    | (Page S78) |
| <b>Table S28.</b> The coordinate of <b>11</b> /PC <sub>71</sub> BM.                                                                                                                                                                                                                                                                    | (Page S82) |

### Section S1. A comparative analysis of intermolecular charge transfer properties

To save the computational cost, we demonstrated a comparative analysis of intermolecular charge transfer properties of PTB7Ir/PC<sub>71</sub>BM based on the ground-state geometries calculated by PBE0 (**Configuration-1**) and PBE0-D2 (**Configuration-2**) functionals, respectively. Note that PBE0-D2 is a functional considering dispersion correction, which presents the high computational cost. The optimized interface geometries are shown in Fig. S1, and coordinates of molecules are listed in Table S15 and Table S16 in Section S4, respectively. Seen from Fig. S1, **Configuration-1** is almost similar to **Configuration-2**.

The CDD maps of <sup>1</sup>CT<sub>1</sub> and <sup>3</sup>CT<sub>1</sub> states of **Configuration-1** and **Configuration-2** are shown in Fig. S2, respectively. The results indicate that the two interface configurations exhibit similar intermolecular charge transfer behaviors. The calculated energy level values of CT<sub>1</sub>,  $E_{\text{Coul}}$  and  $-\Delta G_{\text{CRT}}$  for **Configuration-1** and **Configuration-2** are summarized in Table S1, respectively. According to Table S1, the difference between  $E_{\text{Coul}}$  values of **Configuration-1** and **Configuration-2** is only 0.02 eV, indicating that Coulomb interaction between donor and acceptor would be slightly overestimated without dispersion correction. Additionally, the differences of  $E_{\text{CT1}}$  and  $-\Delta G_{\text{CRT}}$  values between **Configuration-1** and **Configuration-2** are both only 0.06 eV, which is a value of acceptable error. Therefore, to save the computational cost, ground-state geometries of D/PC<sub>71</sub>BM complexes can be performed by PBE0 functional instead of PBE0-D2 functional with dispersion correction.

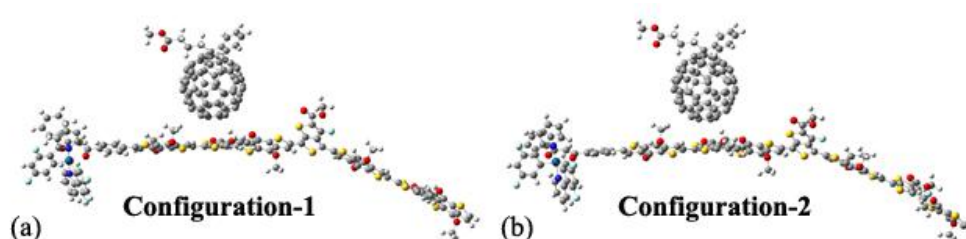

**Fig. S1.** Optimized interface geometries of **Configuration-1** (a), and **Configuration-2** (b), respectively.

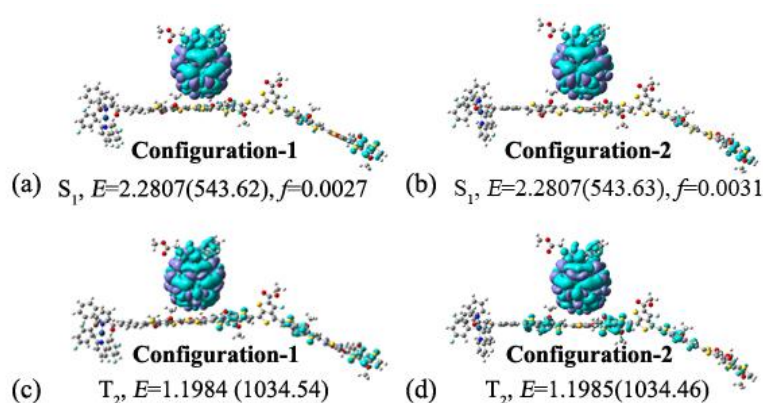

**Fig. S2.** CDD maps of <sup>1</sup>CT<sub>1</sub> of **Configuration-1** (a), <sup>1</sup>CT<sub>1</sub> of **Configuration-2** (b), <sup>3</sup>CT<sub>1</sub> of **Configuration-1** (c) and <sup>3</sup>CT<sub>1</sub> of **Configuration-2** (d), where the violet and turquoise colors refer to the increase and decrease in electron density, respectively.

**Table S1.** Calculated energy level values of  $E_{\text{Coul}}$ ,  $E_{\text{CT1}}$  and  $-\Delta G_{\text{CRT}}$  for **Configuration-1** and **Configuration-2**, respectively.

|                                    | PTB7Ir                 |                        |
|------------------------------------|------------------------|------------------------|
|                                    | <b>Configuration-1</b> | <b>Configuration-2</b> |
| $E_{\text{Coul}}/\text{eV}$        | -0.19                  | -0.17                  |
| $E_{\text{CT1}}/\text{eV}$         | 1.22                   | 1.16                   |
| $-\Delta G_{\text{CRT}}/\text{eV}$ | -0.06                  | -0.12                  |

## Section S2. List of Figures

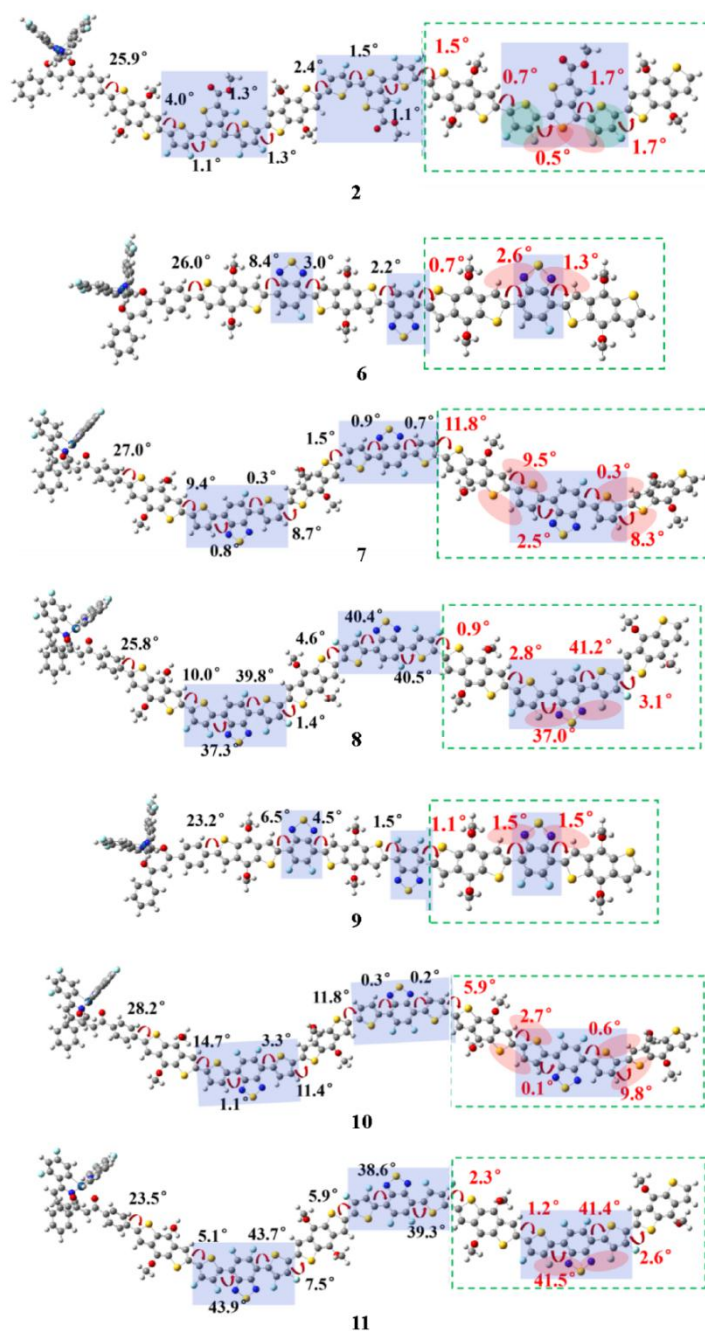

**Fig. S3.** Schematic illustration of twist angles between donor and acceptor moieties of **2** and **6-11**. The green dotted boxes represent the highlights.

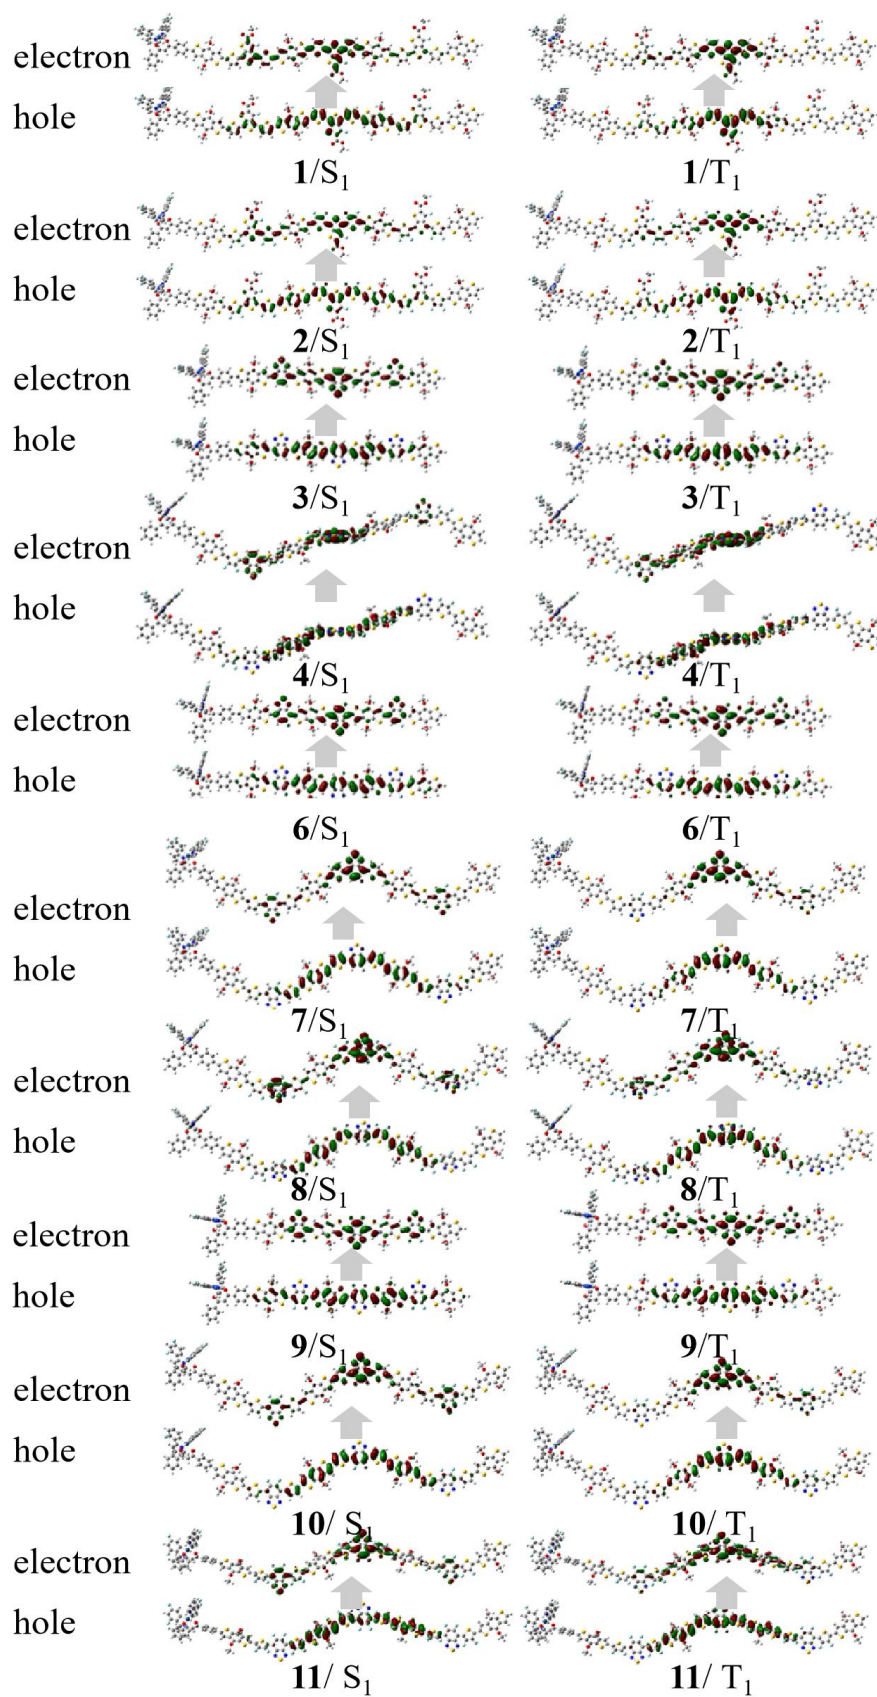

**Fig. S4.** Hole-electron pairs of NTOs in  $S_1$  and  $T_1$  states of **1-3** and **5-11**.

### Section S3. List of Tables

**Table S2.** The HOMO energy levels ( $E_{\text{HOMO}}$ ) of PTB7Ir and **1-11** molecules calculated at the B3LYP/6-31G(d) (LANL2DZ for Ir atom) level.

|                             | PTB7Ir | 1     | 2     | 3     | 4     | 5     | 6     | 7     | 8     | 9     | 10    | 11    |
|-----------------------------|--------|-------|-------|-------|-------|-------|-------|-------|-------|-------|-------|-------|
| $E_{\text{HOMO}}/\text{eV}$ | -4.98  | -4.85 | -4.95 | -5.11 | -4.94 | -5.18 | -5.14 | -4.97 | -5.21 | -5.17 | -5.00 | -5.25 |

**Table S3.** Calculated vertical excitation energies ( $E_g$ ), oscillator strengths ( $f$ ) and excitation characters of  $S_1$  states for PTB7Ir and **1-11** at the B3LYP/6-31G(d) (LANL2DZ for Ir atom) level in o-dichlorobenzene solvent.

| Molecule | $E_g/\text{eV}(\text{nm})$ | $f$   | Composition <sup>a</sup> |
|----------|----------------------------|-------|--------------------------|
| PTB7Ir   | 1.87(665)                  | 3.035 | H→L(93%)                 |
| 1        | 1.76(706)                  | 5.463 | H→L(85%)                 |
| 2        | 1.70(727)                  | 5.627 | H→L(86%)                 |
| 3        | 1.77(702)                  | 3.237 | H→L(92%)                 |
| 4        | 1.69 (734)                 | 4.050 | H→L(83%), H-1→L+1(11%)   |
| 5        | 1.96(634)                  | 3.055 | H→L(79%), H-1→L+1(13%)   |
| 6        | 1.75(708)                  | 3.058 | H→L(89%)                 |
| 7        | 1.70 (731)                 | 3.965 | H→L(82%)                 |
| 8        | 1.92(646)                  | 3.133 | H→L(78%), H-1→L+1(13%)   |
| 9        | 1.77(702)                  | 2.888 | H→L(91%)                 |
| 10       | 1.72 (719)                 | 3.984 | H→L(83%), H-1→L+1(11%)   |
| 11       | 1.95(634)                  | 3.112 | H→L(77%), H-1→L+1(13%)   |

<sup>a</sup>H denotes HOMO and L denotes LUMO.

### Section S4. Coordinates of molecules

**Table S4.** The coordinate of PTB7Ir (213 atoms).

| Atom | Coordinates (Angstroms) |               |               | Atom | Coordinates (Angstroms) |                |               |
|------|-------------------------|---------------|---------------|------|-------------------------|----------------|---------------|
|      | X                       | Y             | Z             |      | X                       | Y              | Z             |
| C    | -2.5489018019           | -1.035875715  | -0.3316402376 | C    | -7.2781978073           | -7.4537451879  | -1.3638635094 |
| C    | -2.6276032364           | 1.4323028579  | 0.1689184701  | C    | -6.1643021479           | -8.3305446658  | -1.4648961928 |
| C    | -3.2118892128           | 0.1718410922  | -0.0537874291 | C    | -7.6055626164           | -10.2119495984 | -1.7738872562 |
| C    | -3.3511298952           | -2.2862207927 | -0.4951996391 | C    | -8.7183545344           | -9.3332915744  | -1.682050597  |
| C    | -2.7519602058           | -3.381213984  | -1.1297060468 | C    | -8.5781595974           | -7.9658734525  | -1.4908398793 |
| C    | -3.4464055218           | -4.5650639445 | -1.319939465  | C    | -6.8703970563           | -6.1033169928  | -1.1396731611 |
| C    | -4.7666368039           | -4.7073814731 | -0.8675566986 | H    | -7.5735381005           | -5.2835606454  | -1.0478420645 |
| C    | -5.3555881687           | -3.6207108182 | -0.2023636798 | C    | -8.0111176333           | -11.5637148021 | -1.9732520381 |
| C    | -4.6633924574           | -2.4328490817 | -0.0259874408 | S    | -10.2244559571          | -10.1962971348 | -1.8182869958 |
| H    | -4.2903533189           | 0.1295892171  | 0.0009100662  | H    | -7.307040887            | -12.3824154517 | -2.0750731427 |
| H    | -1.7273507223           | -3.2823480817 | -1.4728014966 | S    | -4.6639630127           | -7.4709821564  | -1.269224452  |
| H    | -2.9648798633           | -5.3871822593 | -1.8435232879 | C    | -6.3044383369           | -9.6953170662  | -1.6761667203 |
| H    | -6.3567319935           | -3.7221540269 | 0.2065530918  | C    | -5.5151581045           | -5.945065681   | -1.0748295547 |
| H    | -5.1434769864           | -1.6279677692 | 0.5218453336  | C    | -9.3707001889           | -11.7200954802 | -2.0310100659 |
| C    | -3.520064993            | 2.608444848   | 0.4070860464  | O    | -5.2172467225           | -10.5192225992 | -1.7506649848 |
| C    | -4.8472605351           | 2.6579852387  | -0.0361481301 | O    | -9.6702596581           | -7.151072881   | -1.3904205001 |

|    |               |               |               |   |                |                |                |
|----|---------------|---------------|---------------|---|----------------|----------------|----------------|
| C  | -2.9940085024 | 3.7174095643  | 1.0811295855  | C | -4.6919273783  | -10.6567789895 | -3.0654779838  |
| C  | -5.6324455119 | 3.7802073311  | 0.2051372023  | H | -3.8359373521  | -11.3296923673 | -2.9856076122  |
| H  | -5.2645115324 | 1.8308508246  | -0.6026383058 | H | -5.4371539098  | -11.0896570082 | -3.7447409321  |
| C  | -3.7821995355 | 4.8337564431  | 1.3323203374  | H | -4.3597574291  | -9.6899764245  | -3.4633470672  |
| H  | -1.9561718706 | 3.6865284482  | 1.3970994119  | C | -10.1018459826 | -6.6167234828  | -2.6364503339  |
| C  | -5.1055734332 | 4.8679304214  | 0.8973164722  | H | -10.9757799167 | -5.9993018839  | -2.4198645729  |
| H  | -6.6574339513 | 3.8075287219  | -0.1547853582 | H | -9.3186359588  | -5.9983193551  | -3.0928995964  |
| H  | -3.3617691488 | 5.6824541205  | 1.86518195    | H | -10.3840306247 | -7.4146460059  | -3.3341925277  |
| H  | -5.7215302839 | 5.7425293754  | 1.0889492928  | C | -10.1071449679 | -12.9423536292 | -2.2208122057  |
| O  | -1.2978357229 | -1.1889611607 | -0.5066031476 | C | -15.3850274807 | -37.6627228282 | -8.8555551645  |
| O  | -1.3839157082 | 1.6902540235  | 0.2321798564  | C | -14.2971880068 | -36.1335175438 | -7.4514031918  |
| Ir | 0.2189629445  | 0.3159862995  | -0.2218625753 | C | -14.818986915  | -37.4601887779 | -7.5567172961  |
| C  | 1.553383842   | 1.7768603518  | -0.0808639852 | C | -14.6787227293 | -38.2018248369 | -6.3866418211  |
| C  | 2.3149289999  | 2.1199593375  | 1.0396830216  | S | -13.8815401763 | -37.2304138398 | -5.1933772988  |
| C  | 1.6891117751  | 2.5581952092  | -1.2635873651 | S | -14.4854608325 | -35.2154422356 | -8.9218585497  |
| C  | 3.1666631156  | 3.2111680785  | 0.9861860123  | F | -15.9520566025 | -38.8064128812 | -9.2073056699  |
| H  | 2.2563877662  | 1.5509937531  | 1.9615807128  | C | -15.28213409   | -36.582995729  | -9.6815101164  |
| C  | 2.5636621599  | 3.649359009   | -1.255162975  | O | -16.3227601061 | -37.4840415776 | -11.5688976976 |
| C  | 3.3119610567  | 3.9998367552  | -0.1482677594 | C | -16.7624457207 | -37.3474226398 | -12.9186491812 |
| H  | 3.9829914133  | 4.8496356589  | -0.1707513366 | H | -17.2218480278 | -38.3023896532 | -13.1731808852 |
| C  | 0.8913459999  | 2.1203066924  | -2.3995271997 | H | -17.4887391608 | -36.534994718  | -13.0061811556 |
| C  | 0.8498429164  | 2.6896606696  | -3.6788093538 | H | -15.9167810752 | -37.1386262568 | -13.5792895981 |
| C  | 0.0511004085  | 2.1259958743  | -4.6606196242 | C | -15.7214195441 | -36.399085118  | -11.0681051596 |
| H  | 1.4472260215  | 3.5656241842  | -3.8877018959 | O | -15.5487934153 | -35.3668316632 | -11.6814147824 |
| C  | -0.6313267299 | 0.4712153302  | -3.0881023045 | C | -15.6118097651 | -41.3867950475 | -4.6924526069  |
| C  | -0.7042033723 | 0.9925665686  | -4.3678227031 | C | -15.5301176651 | -41.9994177044 | -5.9714717306  |
| H  | 0.0210296321  | 2.5684451703  | -5.6523255155 | C | -16.0515984308 | -44.1367205173 | -5.0384647252  |
| H  | -1.1858065163 | -0.4104474117 | -2.785708939  | C | -16.1382144    | -43.5229183817 | -3.7594260461  |
| H  | -1.3378752239 | 0.5188299078  | -5.1095288815 | C | -15.9373794001 | -42.1617550616 | -3.5693306053  |
| C  | 1.2681925273  | -1.4172377477 | 1.861602949   | C | -15.3390064585 | -39.989614122  | -4.7599890945  |
| C  | -0.2967340559 | 0.1093850844  | 2.7176149247  | H | -15.3554544916 | -39.3402116096 | -3.8914921561  |
| C  | 1.4133408698  | -1.9800395304 | 3.1361924038  | C | -16.2866417491 | -45.5502878403 | -4.9644473328  |
| C  | -0.18657491   | -0.4078656518 | 3.9962752906  | S | -16.5023691994 | -44.6923798862 | -2.519253994   |
| H  | -0.9496753648 | 0.9414243073  | 2.4780385431  | H | -16.2442794094 | -46.2081993612 | -5.8245349961  |
| C  | 0.6849533209  | -1.4752977993 | 4.2014171427  | S | -15.1194712181 | -40.8485934531 | -7.2094694856  |
| H  | 2.0977390268  | -2.804615574  | 3.2758573741  | C | -15.7574250879 | -43.3555455694 | -6.1643741936  |
| H  | -0.7711382215 | 0.0180711777  | 4.8043316006  | C | -15.0638999009 | -39.546598888  | -6.0281497169  |
| H  | 0.799356347   | -1.9124390182 | 5.1893123586  | C | -16.5405997407 | -45.9682395005 | -3.6998165744  |
| C  | 1.968259775   | -1.796774707  | 0.642916334   | H | -16.7413218798 | -46.9804938421 | -3.3717673627  |
| C  | 2.9205527947  | -2.8151444469 | 0.5350639022  | O | -15.656310175  | -43.9142200517 | -7.4076567874  |
| C  | 1.6418234923  | -1.0349981916 | -0.5150350779 | O | -16.0142528084 | -41.6001731157 | -2.3267422829  |
| C  | 3.56748265    | -3.1120563399 | -0.648816009  | C | -16.8896287299 | -43.9603478653 | -8.1142922485  |
| C  | 2.299710427   | -1.3235465702 | -1.7137472879 | H | -16.6720233064 | -44.4128939552 | -9.0837701604  |
| C  | 3.2358643251  | -2.3439241413 | -1.757758204  | H | -17.6281428606 | -44.5723229633 | -7.5811241278  |



|   |                |                |               |   |                |                |               |
|---|----------------|----------------|---------------|---|----------------|----------------|---------------|
| H | 4.3023870895   | -3.905730743   | -0.7029805102 | H | -17.2978105911 | -42.95332353   | -8.265366361  |
| H | 2.0968834417   | -0.7659340217  | -2.6219965837 | C | -17.315407673  | -41.1358621655 | -1.9872970612 |
| N | 0.4029640643   | -0.3797011389  | 1.6850195543  | H | -17.2406889098 | -40.7208494656 | -0.9803028786 |
| N | 0.1361398404   | 1.0173502713   | -2.1350739324 | H | -17.6497773048 | -40.3551581038 | -2.6821577678 |
| F | 3.8546632509   | -2.611152023   | -2.9149954927 | H | -18.0426277782 | -41.9571009435 | -1.9907794509 |
| F | 3.2461071143   | -3.5580216055  | 1.6099176483  | C | -7.2749648719  | -28.0451075404 | -1.3070786625 |
| F | 2.708504154    | 4.4133119711   | -2.3547577524 | C | -8.2564283375  | -25.9394742436 | -1.6188901658 |
| F | 3.886118286    | 3.5305418545   | 2.0696260406  | C | -8.386122098   | -27.3406997222 | -1.8696925263 |
| C | -13.1662936088 | -14.6396864617 | -3.0737328328 | C | -9.2655079377  | -25.168493676  | -2.1648322748 |
| C | -11.419315349  | -13.1523063503 | -2.5979164617 | C | -9.5103638614  | -27.6641889715 | -2.6251975144 |
| C | -11.7893660934 | -14.5291475348 | -2.7007318851 | S | -10.3998601502 | -26.215655707  | -2.9632108171 |
| C | -10.7502138592 | -15.4038582659 | -2.3927605397 | S | -6.8192380457  | -25.5473679364 | -0.7131823228 |
| S | -9.3350123216  | -14.482850134  | -1.9994343934 | F | -7.1475469383  | -29.3592335835 | -1.4109748127 |
| S | -12.7309372986 | -12.0697626857 | -2.984138504  | C | -6.3785103798  | -27.2454265732 | -0.6626408204 |
| F | -13.7649658085 | -15.8119121457 | -3.2210980521 | O | -4.8744290968  | -28.8921320182 | 0.0328819996  |
| C | -13.7897793424 | -13.4418628266 | -3.2622375638 | C | -3.6755952864  | -29.2602675527 | 0.7120902908  |
| O | -15.9098117422 | -14.2376243978 | -3.8354448098 | H | -3.6069622001  | -30.3436211719 | 0.6150442841  |
| C | -17.2595490073 | -13.9857340459 | -4.2205350606 | H | -2.809444198   | -28.7765505894 | 0.2527660209  |
| H | -17.7204608857 | -14.9677658079 | -4.3254407482 | H | -3.7258641284  | -28.9701600103 | 1.7649311603  |
| H | -17.7744586656 | -13.398145228  | -3.4558041411 | C | -5.1376962708  | -27.5806171908 | 0.0432299909  |
| H | -17.2938628008 | -13.4410472073 | -5.167825316  | O | -4.437627165   | -26.7452486439 | 0.575350873   |
| C | -15.1696793102 | -13.1381530708 | -3.6533552573 | C | -11.2545545053 | -30.4056446735 | -4.4449371339 |
| O | -15.5801834748 | -12.0053108163 | -3.7935498662 | C | -10.7497714079 | -31.2834750767 | -3.4476172751 |
| C | -9.853501016   | -18.9744113617 | -1.8249969984 | C | -11.8638245578 | -33.1450196599 | -4.4502959887 |
| C | -10.840455908  | -19.2954858226 | -2.7960655494 | C | -12.363119197  | -32.2666882356 | -5.4506487745 |
| C | -10.3338193008 | -21.6244658577 | -2.6160565842 | C | -12.0634843988 | -30.9123784986 | -5.4747888588 |
| C | -9.3524025578  | -21.3020408619 | -1.6391880647 | C | -10.8255292121 | -29.0651037998 | -4.2326780465 |
| C | -9.1072445746  | -20.0014695962 | -1.2246485358 | H | -11.0980620306 | -28.2454280614 | -4.8883421211 |
| C | -9.7763797913  | -17.57141285   | -1.5971157977 | C | -12.3149867639 | -34.4825712255 | -4.644873082  |
| H | -9.0859089273  | -17.1237372873 | -0.8906047316 | S | -13.3871152202 | -33.1062372193 | -6.5811848551 |
| C | -10.3738996994 | -23.0222782014 | -2.8864366456 | H | -12.0380223423 | -35.3008151001 | -3.9891007777 |
| S | -8.5262112349  | -22.7256351421 | -1.0720891137 | S | -9.7718529971  | -30.4371383454 | -2.2846111349 |
| H | -11.0248296522 | -23.4597121965 | -3.6356504232 | C | -11.0270000337 | -32.6433319315 | -3.4411191351 |
| S | -11.6379003702 | -17.8705137752 | -3.394760557  | C | -10.0262285442 | -28.9143274457 | -3.1273586906 |
| C | -11.1021024373 | -20.5997122624 | -3.1910487415 | C | -13.1232405856 | -34.6294174436 | -5.7414066822 |
| C | -10.6616746439 | -16.8436694193 | -2.3519533757 | O | -10.5371282547 | -33.4604078028 | -2.4623994783 |
| C | -9.4774177976  | -23.7463068107 | -2.1433823118 | O | -12.5689376836 | -30.0878707895 | -6.4381190753 |
| O | -12.0462934235 | -20.872868042  | -4.1395179238 | C | -9.2796711485  | -34.0455640645 | -2.7818597219 |
| O | -8.1450673631  | -19.7244571496 | -0.2969692247 | H | -9.0017996431  | -34.6625030778 | -1.9251706288 |
| C | -13.3320517002 | -21.1600307554 | -3.6017121607 | H | -9.3529720028  | -34.6737626032 | -3.6784847588 |
| H | -13.9863411117 | -21.3499464053 | -4.4547413213 | H | -8.5140329489  | -33.2765081074 | -2.9414477162 |
| H | -13.3020706365 | -22.0476577527 | -2.9573243094 | C | -11.7663019892 | -30.0141275148 | -7.6117203826 |
| H | -13.7194899924 | -20.3099747608 | -3.0268544019 | H | -12.2851447372 | -29.3402962631 | -8.2959955729 |
| C | -8.6253248674  | -19.7068499746 | 1.0427933834  | H | -10.7713486349 | -29.6120561489 | -7.3831111665 |



|   |               |                |              |   |                |                |               |
|---|---------------|----------------|--------------|---|----------------|----------------|---------------|
| H | -7.7639258646 | -19.4814357698 | 1.6742067516 | H | -11.6591057509 | -30.9990720362 | -8.0820227603 |
| H | -9.3920826482 | -18.9336144321 | 1.1770699198 | C | -13.74768539   | -35.8347998629 | -6.2197435388 |
| H | -9.0411623148 | -20.6811419308 | 1.3272825513 |   |                |                |               |

**Table S5.** The coordinate of **1** (255 atoms).

| Atom | Coordinates (Angstroms) |               |               | Atom | Coordinates (Angstroms) |                |                |
|------|-------------------------|---------------|---------------|------|-------------------------|----------------|----------------|
|      | X                       | Y             | Z             |      | X                       | Y              | Z              |
| C    | -3.1996265369           | -0.3229511621 | 0.5416669811  | C    | -6.9732002654           | -13.5151638058 | -3.2337129619  |
| C    | -4.0158150995           | 1.9329019173  | 1.3150277255  | C    | -8.2213074179           | -14.1044719156 | -3.2424102602  |
| C    | -4.1973273582           | 0.6029789806  | 0.8931275021  | S    | -5.7652023433           | -14.6525146452 | -3.7491764482  |
| C    | -3.601658422            | -1.7108269214 | 0.1617805433  | C    | -8.2069675982           | -15.4487317622 | -3.65796862    |
| C    | -2.6990620748           | -2.4889695522 | -0.5731182017 | H    | -9.1228211536           | -13.5758121713 | -2.9508539859  |
| C    | -3.0198850081           | -3.7798881682 | -0.9615018389 | C    | -6.9432875677           | -15.9125472299 | -3.9729655578  |
| C    | -4.2519950979           | -4.353067544  | -0.6128659562 | H    | -9.0979613113           | -16.0634258803 | -3.7326243887  |
| C    | -5.1424023326           | -3.5839375107 | 0.1527866073  | C    | -6.589683208            | -19.6805118319 | -5.1071488707  |
| C    | -4.8259093539           | -2.2870919374 | 0.5256054017  | C    | -7.0655151588           | -21.0114210196 | -5.3742721506  |
| H    | -5.2189111188           | 0.2546510704  | 0.8367184043  | C    | -8.3820166409           | -21.3903031324 | -5.5752624407  |
| H    | -1.7384898309           | -2.0580404892 | -0.8357993299 | S    | -6.0310391013           | -22.409640207  | -5.3950906261  |
| H    | -2.311212261            | -4.3482218517 | -1.5587727335 | C    | -8.5497477099           | -22.7749244986 | -5.7492940417  |
| H    | -6.079419263            | -4.0215689747 | 0.484614413   | H    | -9.1967182957           | -20.6753964739 | -5.6234932958  |
| H    | -5.5272949633           | -1.7367908018 | 1.1451845525  | C    | -7.3643970811           | -23.4807511215 | -5.6863766808  |
| C    | -5.2220682206           | 2.7709261856  | 1.5967777809  | H    | -9.5078769526           | -23.2452593954 | -5.9436558987  |
| C    | -6.4785303161           | 2.50786931    | 1.0378551588  | C    | -7.1544008621           | -24.8975983295 | -5.8435827507  |
| C    | -5.0789951472           | 3.8820960495  | 2.4369731946  | C    | -6.5568483305           | -17.2193025282 | -4.4223402999  |
| C    | -7.5667491169           | 3.3241519438  | 1.326894121   | C    | -5.3411003304           | -17.6922824962 | -4.878528573   |
| H    | -6.6057261258           | 1.6807488725  | 0.3458604138  | C    | -9.3153045886           | -39.1618414472 | -7.7066637908  |
| C    | -6.1688620331           | 4.6909484057  | 2.7344928938  | C    | -7.9361391666           | -38.7869620258 | -7.7557518251  |
| H    | -4.0970545583           | 4.0993338274  | 2.8450014172  | S    | -5.4361100174           | -38.267703661  | -7.8224257313  |
| C    | -7.4177037783           | 4.4131469714  | 2.1823806301  | S    | -9.3380868147           | -36.5873911627 | -7.3030989342  |
| H    | -8.532889777            | 3.1125951286  | 0.876633352   | F    | -9.7116357653           | -40.4158811772 | -7.8676943849  |
| H    | -6.0431220877           | 5.5441045899  | 3.3958091347  | C    | -10.169478444           | -38.1222439756 | -7.4848882164  |
| H    | -8.2697430284           | 5.0479420578  | 2.4106859888  | O    | -12.1836073915          | -39.3034208147 | -7.5326460481  |
| O    | -1.9495330243           | -0.0981184511 | 0.4662928649  | C    | -13.6060929591          | -39.3216290568 | -7.4315932731  |
| O    | -2.9053636072           | 2.5144738269  | 1.5299303579  | H    | -13.8948506619          | -40.3625445435 | -7.5760864784  |
| Ir   | -0.950366222            | 1.716542522   | 1.0735415867  | H    | -13.9262040941          | -38.9660823404 | -6.4486155016  |
| C    | -0.102214332            | 3.4537515776  | 1.5187116806  | H    | -14.0541995392          | -38.6868510977 | -8.2006649445  |
| C    | 0.4603619215            | 3.8306470844  | 2.741192625   | C    | -11.6309388983          | -38.095242418  | -7.3765886299  |
| C    | -0.1224683221           | 4.4016704501  | 0.4561921572  | O    | -12.2565565404          | -37.0770219157 | -7.1679703154  |
| C    | 0.9671312419            | 5.1098994967  | 2.9018066061  | C    | -7.6614001867           | -46.4503716111 | -10.0263633782 |
| H    | 0.5118428027            | 3.1429454732  | 3.5785074395  | C    | -6.3454467539           | -46.9709333564 | -9.8999292152  |
| C    | 0.4030175167            | 5.6781461469  | 0.6798131931  | C    | -7.0700514143           | -49.1308357225 | -10.621663346  |
| C    | 0.9509864816            | 6.0604227756  | 1.8888008246  | C    | -8.3842470249           | -48.6077042409 | -10.7570470796 |
| H    | 1.3524281928            | 7.0558446369  | 2.0333646381  | C    | -8.6956999708           | -47.285389608  | -10.4782232196 |

|   |               |                |               |   |                |                |                |
|---|---------------|----------------|---------------|---|----------------|----------------|----------------|
| C | -0.6925541172 | 3.9275309533   | -0.7963426786 | C | -7.7296407422  | -45.0805776787 | -9.6366666937  |
| C | -0.8163135334 | 4.6376649854   | -1.9974323561 | H | -8.6555296607  | -44.5156022756 | -9.623593591   |
| C | -1.3626831078 | 4.0214463484   | -3.111612657  | C | -7.0143451595  | -50.5170957311 | -10.9516153741 |
| H | -0.4793684706 | 5.6634664996   | -2.0428743782 | S | -9.5062174405  | -49.831984931  | -11.2817346982 |
| C | -1.6434113149 | 2.0400287796   | -1.8189599125 | H | -6.1029802539  | -51.1023308035 | -10.8911193861 |
| C | -1.7843161043 | 2.6962329976   | -3.0291024001 | S | -5.2346135519  | -45.7612350192 | -9.3211463703  |
| H | -1.4566006872 | 4.5736784831   | -4.042408326  | C | -6.0296717796  | -48.2881662009 | -10.1992553097 |
| H | -1.944070322  | 1.0079589141   | -1.6760993993 | C | -8.2237357654  | -51.0363177599 | -11.3282834847 |
| H | -2.2136782547 | 2.1773769532   | -3.8791271268 | O | -4.755759939   | -48.7559317493 | -10.0453356958 |
| C | 0.4263309929  | 0.0588757479   | 3.0241345091  | O | -9.9758369282  | -46.824125551  | -10.6019883754 |
| C | -1.5604505102 | 0.9525224169   | 3.9001526445  | C | -3.9820124203  | -48.7189273133 | -11.2387192713 |
| C | 0.6496377291  | -0.6199646562  | 4.2290140546  | H | -2.9994691128  | -49.1183919211 | -10.9802682313 |
| C | -1.3839807413 | 0.3066407893   | 5.1111239668  | H | -4.4339268515  | -49.3378335783 | -12.0237806984 |
| H | -2.4086968105 | 1.5973645203   | 3.6987897038  | H | -3.8737982894  | -47.6914170346 | -11.6076712717 |
| C | -0.2565471052 | -0.4961297539  | 5.2700191142  | C | -10.2461178286 | -46.2182412137 | -11.860260231  |
| H | 1.5324303266  | -1.2341514115  | 4.3351718687  | H | -11.2905075182 | -45.9013806165 | -11.8310680907 |
| H | -2.1140182698 | 0.4326569612   | 5.9031087626  | H | -9.6027452753  | -45.3450972354 | -12.0262631472 |
| H | -0.0813538996 | -1.0228961834  | 6.2038030388  | H | -10.1033487312 | -46.9317161938 | -12.6812807626 |
| C | 1.2777264926  | 0.0685030916   | 1.8434404488  | C | -4.4883539069  | -33.8368665336 | -6.9940951054  |
| C | 2.4861063388  | -0.621698327   | 1.706149712   | S | -7.0195483025  | -34.2246973779 | -7.1755901007  |
| C | 0.8160998141  | 0.8692264036   | 0.7601929162  | C | -4.6495982319  | -35.2192991532 | -7.1968404169  |
| C | 3.2599617911  | -0.5551819265  | 0.5637936726  | H | -3.5226905579  | -33.3571408188 | -6.8732985865  |
| C | 1.5993219612  | 0.9494582519   | -0.3944556721 | C | -5.9718368153  | -35.6065099824 | -7.3137879411  |
| C | 2.7889190628  | 0.2433982911   | -0.4706500766 | H | -3.8216345448  | -35.9188410774 | -7.2457387591  |
| H | 4.1928084706  | -1.0997730288  | 0.4853907515  | C | -6.71455605    | -39.4399020967 | -7.9117597302  |
| H | 1.2991149428  | 1.5537406774   | -1.2440146684 | C | -6.3599720605  | -40.8178389694 | -8.122561721   |
| N | -0.6885806745 | 0.8303236555   | 2.890418768   | C | -5.1345150311  | -41.4023084265 | -7.8503942554  |
| N | -1.1187198119 | 2.6345244507   | -0.738942037  | S | -7.4266357651  | -41.9797476003 | -8.8561830968  |
| F | 3.5254952108  | 0.3259207492   | -1.586072561  | C | -5.0617252105  | -42.7567091492 | -8.2182196045  |
| F | 2.9458609815  | -1.393383603   | 2.7092488565  | H | -4.3235258073  | -40.8661010848 | -7.3687777806  |
| F | 0.3916797186  | 6.599554649    | -0.302304391  | C | -6.2309482017  | -43.2343377399 | -8.776956477   |
| F | 1.4980452956  | 5.457615454    | 4.0810785592  | H | -4.1881306172  | -43.378681841  | -8.0541094103  |
| C | -4.0604973605 | -19.4418858743 | -5.7624523792 | C | -6.5243836481  | -44.567295641  | -9.2387378344  |
| C | -5.3474916568 | -19.0679706498 | -5.2634402005 | C | -6.5002478309  | -36.9237178802 | -7.5226989395  |
| S | -7.7052303821 | -18.5264866243 | -4.4434588474 | C | -7.8042914197  | -37.3812405616 | -7.5377005179  |
| S | -3.7921181441 | -16.9304353631 | -5.120378008  | C | -5.6800379237  | -33.1414138966 | -6.9488986386  |
| F | -3.8010726845 | -20.6662228302 | -6.1976776719 | C | -5.4039292942  | -58.6479017809 | -12.7673923619 |
| C | -3.1403289936 | -18.43559137   | -5.7448198257 | C | -6.7502449355  | -58.1665736763 | -12.7429424635 |
| O | -1.318768325  | -19.6056956568 | -6.6209711113 | S | -9.1973711917  | -57.4365279961 | -12.7799023268 |
| C | 0.0448811023  | -19.6336562801 | -7.0377192398 | S | -5.1648902011  | -56.1060878134 | -12.2427196576 |
| H | 0.2217058667  | -20.6507458948 | -7.3870489356 | F | -5.1138076262  | -59.9174797763 | -13.0113068917 |
| H | 0.2153498837  | -18.9145712405 | -7.8432894495 | C | -4.4641646469  | -57.6919740637 | -12.5170357318 |
| H | 0.7072086032  | -19.3924007226 | -6.2020545997 | O | -2.5550256206  | -59.0281476209 | -12.6662375382 |
| C | -1.7341624706 | -18.4213036408 | -6.1581997233 | C | -1.1365077976  | -59.1650633141 | -12.6101954223 |

|   |                |                |               |   |                |                |                |
|---|----------------|----------------|---------------|---|----------------|----------------|----------------|
| O | -1.0360615503  | -17.4320503636 | -6.0820056959 | H | -0.9376336038  | -60.2176385479 | -12.8109779824 |
| C | -6.1271925416  | -26.9813749676 | -6.0927143531 | H | -0.6591357926  | -58.5325126512 | -13.3632746036 |
| C | -7.4969682016  | -27.3584432134 | -6.1147059267 | H | -0.7617645307  | -58.8835591314 | -11.6224973895 |
| C | -6.9187005225  | -29.6560721958 | -6.4274726838 | C | -3.0031316315  | -57.7868970561 | -12.44726493   |
| C | -5.5487951345  | -29.2800030814 | -6.3960781365 | O | -2.2917710071  | -56.8321460522 | -12.2146403343 |
| C | -5.1362167056  | -27.9673576699 | -6.2226053795 | C | -7.8435884358  | -66.0769164934 | -13.2668862612 |
| C | -5.9673628393  | -25.5724715902 | -5.9428760449 | C | -9.1867751277  | -66.378636548  | -13.6181802423 |
| H | -4.9987851932  | -25.0841349004 | -5.942878797  | C | -8.733919666   | -68.7244017224 | -13.570332219  |
| C | -7.0791059175  | -31.0585495726 | -6.6305223541 | C | -7.3924364581  | -68.4240098916 | -13.2134157071 |
| S | -4.5050983656  | -30.6563141046 | -6.6186242734 | C | -6.9349847857  | -67.1220776775 | -13.0490067419 |
| H | -8.0495939636  | -31.5376739296 | -6.7036582768 | C | -7.6167204696  | -64.6689213777 | -13.1992148208 |
| S | -8.5412427366  | -25.9760305327 | -5.9386352026 | H | -6.6447600973  | -64.2357341739 | -12.9884764656 |
| C | -7.9093285072  | -28.6740696458 | -6.2680871573 | C | -8.9454415622  | -70.1384910426 | -13.6913804629 |
| C | -5.8924604673  | -31.7319191832 | -6.7429955338 | S | -6.442814964   | -69.8746365214 | -13.0384412073 |
| O | -9.2370994804  | -28.99225719   | -6.302068339  | H | -9.8929381211  | -70.5788741188 | -13.9793121533 |
| O | -3.808840469   | -27.6435192271 | -6.2171481585 | S | -10.1290370029 | -64.9305072512 | -13.8391354491 |
| C | -9.7610284521  | -29.4023353669 | -5.0444508275 | C | -9.6487384392  | -67.6788202448 | -13.762169413  |
| H | -10.8167024805 | -29.626031638  | -5.209583989  | C | -7.8234341296  | -70.8548851346 | -13.4325791037 |
| H | -9.2498362161  | -30.3002101265 | -4.6754949953 | O | -10.9464478059 | -67.9231519329 | -14.1163980607 |
| H | -9.66827002    | -28.6030262071 | -4.2987824917 | O | -5.6322773163  | -66.8713785922 | -12.7227616138 |
| C | -3.2377640797  | -27.5915492932 | -4.9154612212 | C | -11.8031261356 | -68.1711446138 | -13.009276676  |
| H | -2.1865031747  | -27.3299282358 | -5.0510980015 | H | -12.7984926063 | -68.345487834  | -13.4228959634 |
| H | -3.7281419708  | -26.8291057057 | -4.2973203888 | H | -11.479604454  | -69.0564423108 | -12.4474172512 |
| H | -3.310500709   | -28.563922133  | -4.4127670491 | H | -11.8351092407 | -67.3081678169 | -12.3324956105 |
| C | -5.856473558   | -7.6035891671  | -1.5904644544 | C | -5.409766847   | -66.7268499427 | -11.3256007419 |
| C | -4.5360351051  | -8.1016530955  | -1.7517751895 | H | -4.3408994186  | -66.5418698671 | -11.2017563502 |
| C | -5.3644747906  | -10.2577419514 | -2.3659903296 | H | -5.9776587304  | -65.880332418  | -10.9193782845 |
| C | -6.6854966203  | -9.7564154317  | -2.2149809659 | H | -5.6876714891  | -67.6396694286 | -10.7842565063 |
| C | -6.949968536   | -8.4462510495  | -1.8444000704 | C | -9.7351874515  | -52.9027726217 | -12.1631958278 |
| C | -5.8586372688  | -6.237908196   | -1.1726629143 | S | -7.3230175514  | -53.6328731435 | -11.6731487141 |
| H | -6.7693007102  | -5.6743758718  | -1.0049423121 | C | -9.6800511974  | -54.2737591013 | -12.4735697142 |
| C | -5.3587653913  | -11.6353943567 | -2.7364190805 | H | -10.6299969977 | -52.2988648239 | -12.2721343367 |
| S | -7.8745179278  | -10.9874536464 | -2.541517067  | C | -8.4327457684  | -54.8330662797 | -12.2677657898 |
| H | -4.4467131106  | -12.2086127341 | -2.8640782547 | H | -10.5252845936 | -54.8382148244 | -12.853252865  |
| S | -3.3497047133  | -6.885319778   | -1.3778502667 | C | -8.0192044398  | -58.6988177446 | -12.9635610855 |
| C | -4.2713389468  | -9.4076106894  | -2.1416211251 | C | -8.4848164445  | -60.0222426003 | -13.2823325145 |
| C | -4.6073193574  | -5.7097698013  | -1.0228682553 | C | -9.6874776647  | -60.3476976134 | -13.8856941714 |
| O | -2.9874689071  | -9.8572573323  | -2.2645508589 | S | -7.6202094107  | -61.4691233164 | -12.8526014925 |
| O | -8.2350648411  | -8.003336747   | -1.6957432622 | C | -9.9011807159  | -61.7320372458 | -14.00608408   |
| C | -2.4729821707  | -9.7684297545  | -3.5877760208 | H | -10.3784502439 | -59.5979859604 | -14.2567884444 |
| H | -1.4507799482  | -10.1494556999 | -3.5464803965 | C | -8.8644841347  | -62.4899155211 | -13.4991927274 |
| H | -3.0629573343  | -10.3773947867 | -4.28420519   | H | -10.7744742978 | -62.1680338901 | -14.4795451414 |
| H | -2.462113712   | -8.7288747364  | -3.9380857934 | C | -8.7313983526  | -63.9254521711 | -13.4746071489 |
| C | -8.7681118952  | -7.3994598719  | -2.8674433889 | C | -8.0205503978  | -56.1920485408 | -12.4734337739 |

|   |               |                |               |   |               |                |                |
|---|---------------|----------------|---------------|---|---------------|----------------|----------------|
| H | -9.7886665039 | -7.0984620025  | -2.6220411921 | C | -6.7628528568 | -56.7642785419 | -12.4702568856 |
| H | -8.1852190244 | -6.5163424225  | -3.1582411459 | C | -8.5339602296 | -52.3873190593 | -11.7194586171 |
| H | -8.7883629226 | -8.1084387519  | -3.7044901268 | H | -7.7114063425 | -71.931473446  | -13.4632607491 |
| C | -6.6117273409 | -12.1676369457 | -2.874250516  |   |               |                |                |

**Table S6.** The coordinate of **2** (255 atoms).

| Atom | Coordinates (Angstroms) |               |               | Atom | Coordinates (Angstroms) |                |                |
|------|-------------------------|---------------|---------------|------|-------------------------|----------------|----------------|
|      | X                       | Y             | Z             |      | X                       | Y              | Z              |
| C    | -3.2126532331           | -0.1548476844 | 0.1723882799  | C    | -7.0863972999           | -13.4851236842 | -2.9220317955  |
| C    | -4.000126709            | 2.125475351   | 0.9026663478  | C    | -8.3288819722           | -14.0615862866 | -3.0368093229  |
| C    | -4.1980722094           | 0.7875626905  | 0.5139672114  | S    | -5.8652885362           | -14.7007407645 | -3.1760792778  |
| C    | -3.629907956            | -1.5512973955 | -0.1570135312 | C    | -8.3013164239           | -15.4398099208 | -3.320335511   |
| C    | -2.7442460057           | -2.3599222603 | -0.8795054572 | C    | -7.0358292472           | -15.9680186319 | -3.4334352412  |
| C    | -3.0768582264           | -3.6632819469 | -1.212842878  | C    | -6.6699811368           | -19.817134414  | -4.220822602   |
| C    | -4.304102225            | -4.2173328133 | -0.8193969187 | C    | -7.1233214828           | -21.1516126455 | -4.4922621371  |
| C    | -5.1784813062           | -3.4156785691 | -0.0689980388 | C    | -8.4319532966           | -21.5696695982 | -4.6238385054  |
| C    | -4.8501318635           | -2.1072814546 | 0.2491114203  | S    | -6.0764947722           | -22.5349653092 | -4.706228396   |
| H    | -5.2232070269           | 0.4466568803  | 0.480295432   | C    | -8.5882961336           | -22.941776274  | -4.8834850303  |
| H    | -1.786833569            | -1.9434662129 | -1.1750148126 | C    | -7.4033736059           | -23.6320692076 | -4.9603792425  |
| H    | -2.381301726            | -4.2573970405 | -1.8003969578 | C    | -7.18244477             | -25.0317496714 | -5.2027959813  |
| H    | -6.1108986063           | -3.8366065822 | 0.295820546   | C    | -6.6545903495           | -17.3201820255 | -3.7087219866  |
| H    | -5.537685648            | -1.5310199181 | 0.8604406955  | C    | -5.3930512353           | -17.8760518985 | -3.8144026687  |
| C    | -5.19596888             | 2.9804686206  | 1.1766754249  | C    | -9.0661293873           | -39.0500842447 | -8.3063890804  |
| C    | -6.458362729            | 2.7185685385  | 0.6307763633  | C    | -7.6841095437           | -38.7216033122 | -8.1396246568  |
| C    | -5.0368338491           | 4.1059180188  | 1.9946207983  | S    | -5.1767417524           | -38.258948109  | -7.8545115769  |
| C    | -7.5370344048           | 3.5503960198  | 0.911108332   | S    | -9.0863191814           | -36.5074150239 | -7.7573252789  |
| H    | -6.5973014612           | 1.879587964   | -0.0445252418 | F    | -9.4760551748           | -40.2771646938 | -8.5992439018  |
| C    | -6.1172769539           | 4.9302853303  | 2.2838382302  | C    | -9.9199936714           | -38.000223499  | -8.1382246995  |
| H    | -4.0502246862           | 4.3216945041  | 2.3920582213  | O    | -11.9393180693          | -39.1118355342 | -8.5174222608  |
| C    | -7.3722296252           | 4.6537609942  | 1.745020264   | C    | -13.3633603501          | -39.0892234747 | -8.6040907313  |
| H    | -8.5080192796           | 3.3395832924  | 0.4710571518  | H    | -13.6563433841          | -40.1106805699 | -8.845694182   |
| H    | -5.9794331626           | 5.7945115903  | 2.9281428653  | H    | -13.800947722           | -38.7778612582 | -7.651977966   |
| H    | -8.2168422283           | 5.3006715664  | 1.9668044881  | H    | -13.6894215469          | -38.3990185128 | -9.3865952159  |
| O    | -1.962506197            | 0.0586911338  | 0.0695749924  | C    | -11.3824065712          | -37.9331105463 | -8.2211393125  |
| O    | -2.8822921701           | 2.700821467   | 1.0940306907  | O    | -12.0025320392          | -36.9071181982 | -8.0365165441  |
| Ir   | -0.9396727392           | 1.8738062884  | 0.6359461667  | C    | -7.6324828805           | -46.459417098  | -10.0192506513 |
| C    | -0.0698044651           | 3.6094469346  | 1.0444588203  | C    | -6.3265081577           | -47.0150063462 | -9.9460991201  |
| C    | 0.5078869457            | 4.0004572255  | 2.2553656199  | C    | -7.1620157184           | -49.1788322425 | -10.5202249848 |
| C    | -0.089776983            | 4.5396513286  | -0.0334948964 | C    | -8.4673181677           | -48.6221107841 | -10.5984223497 |
| C    | 1.0299699751            | 5.2765348037  | 2.3899600155  | C    | -8.7193828346           | -47.278111298  | -10.3654201712 |
| H    | 0.5598201347            | 3.3261890836  | 3.1034806846  | C    | -7.6338624849           | -45.0707879655 | -9.7043332656  |
| C    | 0.4514474414            | 5.813857278   | 0.1639507021  | H    | -8.5382850305           | -44.472076318  | -9.6844561574  |
| C    | 1.0146820429            | 6.2101719128  | 1.3613411125  | C    | -7.1680635602           | -50.5782901265 | -10.7859094778 |
| H    | 1.4280857496            | 7.2034427725  | 1.4855318095  | S    | -9.6590222375           | -49.8281377401 | -10.9933023962 |

|   |               |                |               |   |                |                |                |
|---|---------------|----------------|---------------|---|----------------|----------------|----------------|
| C | -0.6760356526 | 4.0507307024   | -1.2727222751 | H | -6.2722499686  | -51.1890947298 | -10.748572263  |
| C | -0.8042275308 | 4.74231043     | -2.4841049235 | S | -5.1430461606  | -45.8213068331 | -9.4943543914  |
| C | -1.3669666481 | 4.1133627652   | -3.5828902574 | C | -6.0711881058  | -48.3547044955 | -10.2008690424 |
| H | -0.4581266214 | 5.763984243    | -2.5496457862 | C | -8.4157332677  | -51.0729350016 | -11.0611093217 |
| C | -1.655034637  | 2.156256821    | -2.2553135746 | O | -4.8080017156  | -48.8633305898 | -10.1021673514 |
| C | -1.8007847066 | 2.7939786399   | -3.4747920832 | O | -9.9869843501  | -46.7738403405 | -10.4318347877 |
| H | -1.4643141427 | 4.6512647807   | -4.5216935695 | C | -4.0863946323  | -48.8551790613 | -11.3288079316 |
| H | -1.9649327397 | 1.1298742245   | -2.092418276  | H | -3.1054232609  | -49.2812988551 | -11.1104906162 |
| H | -2.2432644983 | 2.265708748    | -4.3121958916 | H | -4.5908257401  | -49.4656186473 | -12.0882341076 |
| C | 0.4353864515  | 0.2333554164   | 2.6023568629  | H | -3.9644415015  | -47.8336499634 | -11.7095008923 |
| C | -1.534425099  | 1.1626935722   | 3.4795424884  | C | -10.3399690221 | -46.2808544471 | -11.7191394086 |
| C | 0.6609697416  | -0.4286264195  | 3.8161317525  | H | -11.3675790923 | -45.9211242036 | -11.6392471168 |
| C | -1.3552436262 | 0.5343452252   | 4.6993124236  | H | -9.6835227566  | -45.4542095617 | -12.0188903236 |
| H | -2.3771015447 | 1.813583287    | 3.2743579981  | H | -10.2887304858 | -47.0741605249 | -12.4749037365 |
| C | -0.2353927233 | -0.278186744   | 4.8621481666  | C | -4.3049604415  | -33.8414624397 | -6.8307190784  |
| H | 1.537922537   | -1.0506305079  | 3.9251918858  | S | -6.8096041354  | -34.2338650675 | -7.0957228171  |
| H | -2.0774197421 | 0.6810611006   | 5.4949241657  | C | -4.4526834285  | -35.2060620234 | -7.1404692224  |
| H | -0.0584180564 | -0.791850487   | 5.8028677881  | C | -5.7568278953  | -35.6063211473 | -7.3208223689  |
| C | 1.2773673732  | 0.2150671044   | 1.4149990075  | C | -6.4561401408  | -39.3898152867 | -8.1942040792  |
| C | 2.477560274   | -0.4895761995  | 1.279352696   | C | -6.1214922918  | -40.7577096382 | -8.4711230246  |
| C | 0.8155116209  | 1.0034317314   | 0.3228493815  | C | -4.860069069   | -41.3179122035 | -8.4600666615  |
| C | 3.2431663242  | -0.4486609544  | 0.1302417452  | S | -7.2756687909  | -42.0008974805 | -8.8922485324  |
| C | 1.5904976165  | 1.0578270144   | -0.8388274392 | C | -4.8209694858  | -42.6860356174 | -8.7777283968  |
| C | 2.7723442653  | 0.3386564893   | -0.9129292011 | C | -6.053330432   | -43.2299163243 | -9.0468251823  |
| H | 4.1699162671  | -1.0037741623  | 0.0533033653  | C | -6.388873585   | -44.5801238636 | -9.4087374202  |
| H | 1.2896916539  | 1.6521063045   | -1.6952068692 | C | -6.2536206596  | -36.9097925795 | -7.6421405847  |
| N | -0.6721003944 | 1.0147968302   | 2.4651074732  | C | -7.5557484418  | -37.3350951108 | -7.8296624974  |
| N | -1.1142584184 | 2.7630898224   | -1.1901606944 | C | -5.4894600237  | -33.1472280472 | -6.763661245   |
| F | 3.5012325774  | 0.3964109822   | -2.0349380646 | C | -5.7317577315  | -58.7501430378 | -12.3428059259 |
| F | 2.9371415464  | -1.2503533298  | 2.2908129922  | C | -7.0756221969  | -58.2611737907 | -12.3629204798 |
| F | 0.4408739452  | 6.7188230634   | -0.8333083557 | S | -9.5256625724  | -57.5030551342 | -12.4319771787 |
| F | 1.575504527   | 5.6379660695   | 3.55834177    | S | -5.4846230659  | -56.2124111389 | -11.8273963055 |
| C | -4.0369883562 | -19.7386721425 | -4.1892680507 | F | -5.4341614726  | -60.0233990697 | -12.5654171429 |
| C | -5.3864998247 | -19.2736347917 | -4.1002953015 | C | -4.7893588986  | -57.8008640404 | -12.0774991273 |
| S | -7.8470217345 | -18.5582795156 | -3.972193626  | O | -2.8832262228  | -59.1469906542 | -12.1785263047 |
| S | -3.7937908554 | -17.2017070112 | -3.6683629932 | C | -1.4662302346  | -59.2895452361 | -12.0911260451 |
| F | -3.7357480297 | -21.0043395086 | -4.4480864027 | H | -1.2677412693  | -60.3439666723 | -12.2819931951 |
| C | -3.0932632605 | -18.7752008747 | -3.9873882324 | H | -0.9704807534  | -58.6630067122 | -12.8372011133 |
| O | -1.1785145257 | -20.0876373649 | -4.2463790767 | H | -1.1122232532  | -59.0042876801 | -11.0969697122 |
| C | 0.2431533317  | -20.2059752428 | -4.2722539869 | C | -3.3302523959  | -57.9033575584 | -11.9758254811 |
| H | 0.4437491764  | -21.2563123356 | -4.4824683444 | O | -2.6214947029  | -56.949271981  | -11.7334417976 |
| H | 0.667246671   | -19.5690901264 | -5.052958116  | C | -7.803547181   | -66.0328077065 | -13.9472565032 |
| H | 0.6702078844  | -19.9170873088 | -3.3083078367 | C | -9.1561712157  | -66.4048292019 | -14.1697620563 |
| C | -1.6290373811 | -18.8529913467 | -4.000800529  | C | -8.5182643891  | -68.6671439357 | -14.6017763286 |

|   |                |                |               |   |                |                |                |
|---|----------------|----------------|---------------|---|----------------|----------------|----------------|
| O | -0.9195364715  | -17.8883091021 | -3.8078595154 | C | -7.1655037024  | -68.2961033959 | -14.3742225323 |
| C | -6.097717081   | -27.076789967  | -5.5073230993 | C | -6.7926469594  | -67.0007580449 | -14.0383343479 |
| C | -7.4534404888  | -27.4638329577 | -5.6860011702 | C | -7.6794065065  | -64.6433964387 | -13.6534717999 |
| C | -6.8049791547  | -29.7255421778 | -6.1030373336 | H | -6.7234880011  | -64.1621217694 | -13.4757206356 |
| C | -5.4497087011  | -29.3397414924 | -5.9182556207 | C | -8.6359389353  | -70.0547275232 | -14.9475835569 |
| C | -5.0799107363  | -28.0382296916 | -5.6124299844 | S | -6.0920644362  | -69.6519698674 | -14.5915719004 |
| C | -5.9775220703  | -25.683858803  | -5.236944952  | H | -9.5791261575  | -70.5335697059 | -15.18313824   |
| H | -5.0214824503  | -25.1919804953 | -5.092363439  | S | -10.2327704782 | -65.0460768524 | -14.0125474514 |
| C | -6.9215869741  | -31.109211367  | -6.4208261461 | C | -9.5303128143  | -67.7042270088 | -14.4833725284 |
| S | -4.3626798822  | -30.6814838197 | -6.1395507822 | C | -7.4365503173  | -70.6867656516 | -14.9719338547 |
| H | -7.8734145143  | -31.5890475329 | -6.6226914407 | O | -10.840782894  | -68.020192717  | -14.7082350333 |
| S | -8.5367490068  | -26.1120186331 | -5.5167203938 | O | -5.4823935987  | -66.6692283187 | -13.8397406568 |
| C | -7.8249844996  | -28.7699811371 | -5.9702441616 | C | -11.5217017362 | -68.4930151878 | -13.5528618401 |
| C | -5.7158085138  | -31.7578941453 | -6.4713162313 | H | -12.5473663746 | -68.701116329  | -13.8638281145 |
| O | -9.1354582608  | -29.1055168549 | -6.1550975717 | H | -11.0607973578 | -69.4122988493 | -13.1698735256 |
| O | -3.7672950019  | -27.694442734  | -5.4562886465 | H | -11.5279925528 | -67.7356910066 | -12.7590890426 |
| C | -9.7865475318  | -29.5551554348 | -4.9722460649 | C | -5.0569754492  | -66.8042088022 | -12.4892239197 |
| H | -10.8143707061 | -29.7874443816 | -5.2571523632 | H | -4.0033888131  | -66.518656284  | -12.468519087  |
| H | -9.3039191905  | -30.4561330571 | -4.573248531  | H | -5.6296213946  | -66.142800432  | -11.8267323489 |
| H | -9.7884553478  | -28.7751359203 | -4.200967325  | H | -5.1612795083  | -67.8396055765 | -12.1422589277 |
| C | -3.3062090768  | -27.7899104473 | -4.1135869734 | C | -9.9965679479  | -52.9825245715 | -11.6207035712 |
| H | -2.2551417895  | -27.4952239216 | -4.1280382141 | S | -7.5486424455  | -53.6794224455 | -11.4774657709 |
| H | -3.8675899315  | -27.1159754096 | -3.4542555334 | C | -9.9703874768  | -54.3631190354 | -11.8910494718 |
| H | -3.3920165444  | -28.816690081  | -3.7372901745 | C | -8.7128436454  | -54.9210868545 | -11.8580836896 |
| C | -5.936086862   | -7.5010178101  | -1.6242262742 | C | -8.3554513815  | -58.7838537992 | -12.5780772692 |
| C | -4.6196448869  | -8.0153853826  | -1.7725912144 | C | -8.8100811117  | -60.1116724116 | -12.8789728871 |
| C | -5.4706484514  | -10.1949543503 | -2.2575368428 | C | -10.1156231291 | -60.5134649713 | -13.0743887643 |
| C | -6.7869918406  | -9.6787965621  | -2.1207011161 | S | -7.7697768069  | -61.5045065829 | -13.0623630193 |
| C | -7.0377838026  | -8.3474568475  | -1.8196825542 | C | -10.2750008933 | -61.8806472191 | -13.3579117354 |
| C | -5.9263167203  | -6.115931287   | -1.2763200573 | C | -9.0953435053  | -62.5828736924 | -13.3913605804 |
| H | -6.8321918163  | -5.5394281821  | -1.1281997538 | C | -8.8786316051  | -63.9819662218 | -13.645171764  |
| C | -5.4777816614  | -11.5890830022 | -2.5523928183 | C | -8.335150377   | -56.2824383691 | -12.0888704965 |
| S | -7.9907984227  | -10.9143359646 | -2.3575337558 | C | -7.0794792606  | -56.8608193462 | -12.0903830408 |
| H | -4.5695374832  | -12.1707277115 | -2.6700192636 | C | -8.7613972639  | -52.4338732853 | -11.3697396858 |
| S | -3.4229109535  | -6.7882814237  | -1.4725525378 | H | -7.2476037811  | -71.7258778285 | -15.2108652478 |
| C | -4.3681963391  | -9.3419792408  | -2.0937510352 | F | -9.4742680263  | -13.4003234405 | -2.8978480509  |
| C | -4.6708155979  | -5.5890454441  | -1.1645838483 | F | -9.4162608954  | -16.1533951759 | -3.4628306786  |
| O | -3.0910267969  | -9.8125510681  | -2.2073097501 | F | -9.4840015546  | -20.7621619781 | -4.5162346802  |
| O | -8.3166471106  | -7.8864984144  | -1.6770716593 | F | -9.7899647179  | -23.4901922384 | -5.0344389941  |
| C | -2.5739242049  | -9.7527415676  | -3.5311692499 | F | -3.1087221301  | -33.2988131673 | -6.624976319   |
| H | -1.5572091291  | -10.1473035082 | -3.4822959096 | F | -3.406465326   | -36.022519952  | -7.244651671   |
| H | -3.1724167032  | -10.3651666725 | -4.2174097548 | F | -3.749911241   | -40.6409744408 | -8.1773756458  |
| H | -2.5479811097  | -8.7197756862  | -3.8995292057 | F | -3.6773777664  | -43.3634705189 | -8.8076395077  |
| C | -8.8751958904  | -7.3708744219  | -2.8790639462 | F | -11.1336662536 | -52.2933160548 | -11.6161835453 |

|   |               |                |               |   |                |                |                |
|---|---------------|----------------|---------------|---|----------------|----------------|----------------|
| H | -9.8884757552 | -7.0468136001  | -2.6333667267 | F | -11.0787717414 | -55.0516936911 | -12.1550701339 |
| H | -8.2956913645 | -6.5156838559  | -3.2492482512 | F | -11.1626461285 | -59.6952787099 | -13.0058485529 |
| H | -8.9183651337 | -8.1413143763  | -3.6588983167 | F | -11.4749719742 | -62.4130358043 | -13.5684455003 |
| C | -6.7378434188 | -12.1178302119 | -2.6442929358 |   |                |                |                |

**Table S7.** The coordinate of **3** (198 atoms).

| Atom | Coordinates (Angstroms) |               |               | Atom | Coordinates (Angstroms) |                |               |
|------|-------------------------|---------------|---------------|------|-------------------------|----------------|---------------|
|      | X                       | Y             | Z             |      | X                       | Y              | Z             |
| C    | -2.1977540307           | -1.0477834086 | 0.1539387063  | C    | -10.2961557294          | -13.3422803498 | -3.0569895596 |
| C    | -2.0903148418           | 1.3446432018  | 0.940080755   | C    | -10.7768925423          | -11.9940224882 | -2.9216349874 |
| C    | -2.7671419385           | 0.1801072978  | 0.5338172856  | N    | -9.0226495696           | -13.7268139818 | -2.9744555777 |
| C    | -3.098302974            | -2.1939184209 | -0.1769723461 | N    | -10.5791317542          | -15.6216027561 | -3.3925540024 |
| C    | -2.5674435231           | -3.2749820552 | -0.8915158158 | C    | -14.4898445372          | -17.4360202355 | -4.0264379028 |
| C    | -3.3535936104           | -4.3664435196 | -1.2260931499 | C    | -15.6569820479          | -16.6285093759 | -4.0860833167 |
| C    | -4.702349588            | -4.4260485088 | -0.8455680205 | C    | -17.0282233551          | -18.5405972024 | -4.5014731675 |
| C    | -5.2263067578           | -3.3553975675 | -0.1047786057 | C    | -15.8631072241          | -19.3498849582 | -4.4284185089 |
| C    | -4.4411286712           | -2.259972855  | 0.2177663791  | C    | -14.6012272327          | -18.827086189  | -4.1872331736 |
| H    | -3.8462971247           | 0.2353522329  | 0.5259232632  | C    | -13.3154701698          | -16.6602605244 | -3.7976539743 |
| H    | -1.5218412965           | -3.2403346643 | -1.1794862666 | H    | -12.319456269           | -17.0786784387 | -3.7425303462 |
| H    | -2.9215078614           | -5.1786714105 | -1.8053908523 | C    | -18.1970794929          | -19.3109657762 | -4.7715567186 |
| H    | -6.2518853608           | -3.4019557581 | 0.2498461643  | S    | -16.2391303967          | -21.0279456769 | -4.6877480745 |
| H    | -4.8754128606           | -1.4701555951 | 0.8224821361  | H    | -19.1842111123          | -18.8848850187 | -4.8899592962 |
| C    | -2.8894020785           | 2.5652862413  | 1.2691038074  | S    | -15.2781027798          | -14.9472506683 | -3.8550621778 |
| C    | -4.1739902807           | 2.7931631368  | 0.7610049577  | C    | -16.9208356264          | -17.152877852  | -4.3118585415 |
| C    | -2.3136587305           | 3.5328328547  | 2.1017029592  | C    | -13.5617644958          | -15.3179605354 | -3.6733902318 |
| C    | -4.8711381604           | 3.9498465699  | 1.0930385697  | C    | -17.9525348733          | -20.6541172221 | -4.8898717603 |
| H    | -4.6236630568           | 2.0816410847  | 0.0749240781  | O    | -18.0113838245          | -16.3342997018 | -4.3822581058 |
| C    | -3.0149198382           | 4.6828693928  | 2.4425968789  | O    | -13.5059884954          | -19.641385439  | -4.1451754262 |
| H    | -1.3062106707           | 3.365580573   | 2.4690629049  | C    | -18.7549650148          | -16.2607237011 | -3.1720296638 |
| C    | -4.2977964099           | 4.8941285016  | 1.9413127969  | H    | -19.5837039126          | -15.5759638448 | -3.3623416997 |
| H    | -5.8631098269           | 4.1171755752  | 0.6820327788  | H    | -19.1506505749          | -17.2435697358 | -2.8880962005 |
| H    | -2.5577464448           | 5.4195890092  | 3.0977543116  | H    | -18.1374905672          | -15.8694576242 | -2.3539390442 |
| H    | -4.8454639962           | 5.7955223817  | 2.203251593   | C    | -13.1195846699          | -20.0169386283 | -2.8288613571 |
| O    | -0.9572153951           | -1.2967782911 | 0.0187926944  | H    | -12.2473992005          | -20.6644715075 | -2.9379879985 |
| O    | -0.8361345512           | 1.4719976569  | 1.1076541638  | H    | -12.850690428           | -19.1393679094 | -2.2281442246 |
| Ir   | 0.6678695344            | 0.0203583968  | 0.5601274715  | H    | -13.9234549472          | -20.5677171093 | -2.3247760788 |
| C    | 2.1090432354            | 1.3291041298  | 0.9443643354  | S    | -22.4973953228          | -20.602974393  | -5.5483981421 |
| C    | 2.8229281466            | 1.4733030199  | 2.1370649811  | C    | -20.7424458628          | -23.9687688997 | -5.6637505282 |
| C    | 2.3874332564            | 2.2216479509  | -0.1296206887 | C    | -18.4943447616          | -23.0505893971 | -5.2455005981 |
| C    | 3.76834446              | 2.4788998147  | 2.2569588052  | C    | -19.378452299           | -24.1207893768 | -5.4888337793 |
| H    | 2.6559895116            | 0.8142229839  | 2.9825107614  | H    | -17.4430427585          | -23.2968712803 | -5.1236609743 |
| C    | 3.3524300082            | 3.217243897   | 0.0523234599  | H    | -18.9466962413          | -25.1168440374 | -5.535226823  |
| C    | 4.0557041356            | 3.3707166017  | 1.2312536904  | C    | -21.2124245513          | -22.6121325295 | -5.5851872287 |
| H    | 4.7991813054            | 4.1501199879  | 1.3439723937  | C    | -20.3021622511          | -21.5100678808 | -5.3300718087 |



|   |               |                |               |   |                |                |               |
|---|---------------|----------------|---------------|---|----------------|----------------|---------------|
| C | 1.6238165266  | 1.9945206545   | -1.3477525909 | C | -18.8921533603 | -21.7287731893 | -5.1524382416 |
| C | 1.7095555151  | 2.7072314948   | -2.5506929213 | N | -20.9186782956 | -20.3291081955 | -5.2861657391 |
| C | 0.9191486247  | 2.3413548701   | -3.628336055  | N | -22.4773364593 | -22.2166136408 | -5.7270108749 |
| H | 2.3965526189  | 3.5380244376   | -2.6253155072 | C | -23.5239930045 | -26.4071263564 | -6.2802000316 |
| C | -0.0042882858 | 0.594570566    | -2.2969781382 | C | -22.5212281272 | -27.4123608844 | -6.2404692601 |
| C | 0.0445708659  | 1.2636080194   | -3.5072232887 | C | -24.1500381045 | -29.1290712224 | -6.5716774293 |
| H | 0.9874750585  | 2.8945435861   | -4.560785555  | C | -25.1512784703 | -28.1227845737 | -6.6232873019 |
| H | -0.6548328194 | -0.255489905   | -2.1237505026 | C | -24.8637138063 | -26.7723296038 | -6.4918943895 |
| H | -0.5880409056 | 0.9439652179   | -4.3280295602 | C | -22.9816216791 | -25.1038529837 | -6.0800168576 |
| C | 1.4588582032  | -2.0286452789  | 2.4642986851  | H | -23.579259064  | -24.2027907865 | -6.0491704822 |
| C | -0.0421641091 | -0.4968586833  | 3.4193141439  | C | -24.7006714715 | -30.4369728157 | -6.711922657  |
| C | 1.4873054285  | -2.747147178   | 3.6664399418  | S | -26.7319057301 | -28.8113849715 | -6.8501228191 |
| C | -0.0463350663 | -1.1685333808  | 4.6291189487  | H | -24.1126132173 | -31.3440253922 | -6.6753772834 |
| H | -0.6188604626 | 0.4054865633   | 3.2490060501  | S | -20.9467070996 | -26.7274466444 | -5.9655503917 |
| C | 0.7340413682  | -2.3166176947  | 4.7468253028  | C | -22.8062049457 | -28.7611955281 | -6.3915448735 |
| H | 2.1016296404  | -3.6332247974  | 3.7388394068  | C | -21.622808924  | -25.0978650872 | -5.9022064778 |
| H | -0.6473500379 | -0.7972817976  | 5.4519411968  | C | -26.061305629  | -30.4439423127 | -6.8734520893 |
| H | 0.757796117   | -2.8747260512  | 5.6785135444  | O | -21.8110037009 | -29.6933237262 | -6.3224960254 |
| C | 2.19859872    | -2.3175469415  | 1.2443991382  | O | -25.8606782227 | -25.8400226992 | -6.5277805257 |
| C | 3.0773952399  | -3.3895479776  | 1.060065949   | C | -21.3461410572 | -30.1356410648 | -7.5918430232 |
| C | 1.9949567627  | -1.4030599959  | 0.1721829954  | H | -20.5578524417 | -30.8642723005 | -7.3928037306 |
| C | 3.7649138208  | -3.5986870843  | -0.119723748  | H | -22.149539577  | -30.6138189817 | -8.1654045378 |
| C | 2.6944955503  | -1.6033125612  | -1.0208386977 | H | -20.9345737508 | -29.3008758302 | -8.1727273199 |
| C | 3.552801139   | -2.6839220587  | -1.143439586  | C | -26.0333730503 | -25.2335124592 | -7.8026394561 |
| H | 4.4406471557  | -4.4372538793  | -0.2342651212 | H | -26.8536027666 | -24.5210523102 | -7.6951505169 |
| H | 2.5836493842  | -0.9297948849  | -1.8639106135 | H | -25.1260154958 | -24.7024669864 | -8.1157192072 |
| N | 0.6824961016  | -0.9128804584  | 2.3721031783  | H | -26.2951799319 | -25.9809309416 | -8.5619310233 |
| N | 0.7566721416  | 0.9482043489   | -1.2525214031 | S | -25.1924598473 | -34.9376691834 | -7.2485266788 |
| F | 4.2123055335  | -2.8653999458  | -2.2947816873 | C | -28.8250264888 | -33.8357508801 | -7.3478871791 |
| F | 3.2871164725  | -4.2753080118  | 2.0524382168  | C | -28.3262004791 | -31.4361601653 | -7.0961050303 |
| F | 3.6340074872  | 4.0807303996   | -0.9421233313 | C | -29.2214977228 | -32.5143092931 | -7.248427729  |
| F | 4.4413091325  | 2.607216546    | 3.4076235063  | H | -28.7585931787 | -30.4419700867 | -7.0227170424 |
| C | -7.4331144447 | -6.8604498882  | -1.6804982676 | H | -30.2805116109 | -32.2748133031 | -7.2914270788 |
| C | -6.4100089946 | -7.8427937125  | -1.761116516  | C | -27.4038166475 | -34.0449274336 | -7.2874998291 |
| C | -8.0128725208 | -9.5475240696  | -2.251577564  | C | -26.4814500941 | -32.9341716588 | -7.1338340482 |
| C | -9.0330380289 | -8.5610295325  | -2.1870169926 | C | -26.9518667286 | -31.5794384573 | -7.0316921685 |
| C | -8.7668264879 | -7.2264251952  | -1.9175475172 | N | -25.206123756  | -33.3205602705 | -7.1020401596 |
| C | -6.9064792205 | -5.5745311185  | -1.3523098178 | N | -26.7866592821 | -35.2242350807 | -7.3600648774 |
| H | -7.5261046148 | -4.6907104557  | -1.2530763568 | C | -30.7202885478 | -37.0397456401 | -7.8112912606 |
| C | -8.5411133519 | -10.8462885571 | -2.5159943776 | C | -31.894768334  | -36.2503370545 | -7.6910632099 |
| S | -10.603928306 | -9.2565829113  | -2.4574666295 | C | -33.2846159304 | -38.1665357643 | -8.016091429  |
| H | -7.934744764  | -11.7400038801 | -2.5776477501 | C | -32.1108486133 | -38.9582126414 | -8.1293947044 |
| S | -4.8449750812 | -7.1570582268  | -1.429516396  | C | -30.8338310045 | -38.4222375033 | -8.0214165088 |
| C | -6.6743504675 | -9.1744868246  | -2.0500246688 | C | -29.5342173985 | -36.2531918075 | -7.70116932   |

|   |                |                |               |   |                |                |               |
|---|----------------|----------------|---------------|---|----------------|----------------|---------------|
| C | -5.5495775032  | -5.5651133204  | -1.1926422056 | H | -28.5348514597 | -36.6576774523 | -7.7881325669 |
| C | -9.9031510212  | -10.8651339575 | -2.6591478304 | C | -34.4721497618 | -38.9552771816 | -8.1771891366 |
| O | -5.6634986108  | -10.0910615979 | -2.0926457264 | S | -32.4992041323 | -40.6310147067 | -8.4264351675 |
| O | -9.7728807328  | -6.30334768    | -1.8445673861 | H | -35.4731439395 | -38.5408679875 | -8.1483804443 |
| C | -5.1848950598  | -10.3589966731 | -3.4047258598 | S | -31.5077498886 | -34.5728595841 | -7.4420175543 |
| H | -4.38627281    | -11.095320912  | -3.2957490433 | C | -33.1704968775 | -36.7890098877 | -7.7794620337 |
| H | -5.9783641704  | -10.7707803976 | -4.0404867867 | C | -29.7772790194 | -34.9214002772 | -7.4972505829 |
| H | -4.783416509   | -9.4503172046  | -3.8704108516 | O | -34.2786045316 | -35.9944464302 | -7.6764188079 |
| C | -10.0620123438 | -5.6783431343  | -3.0885335953 | O | -29.7335071149 | -39.2185418875 | -8.1584534781 |
| H | -10.8784554788 | -4.9783438388  | -2.8994943453 | C | -34.7932815415 | -35.9034242187 | -6.354505675  |
| H | -9.1898446638  | -5.1308380193  | -3.4679489841 | H | -35.6618119903 | -35.2436421253 | -6.4065402131 |
| H | -10.378939269  | -6.4140620977  | -3.8381187353 | H | -35.1028529005 | -36.8878848064 | -5.9811608154 |
| S | -8.9940279909  | -15.3363516482 | -3.1865805771 | H | -34.0512502045 | -35.4761213071 | -5.6685328251 |
| C | -12.6214598802 | -14.2392428031 | -3.430175584  | C | -29.1613252755 | -39.6305431325 | -6.9234683502 |
| C | -12.1464112464 | -11.8508073607 | -3.0549611303 | H | -28.3033433138 | -40.2563998283 | -7.1767114636 |
| C | -13.027522762  | -12.9232915964 | -3.2988437278 | H | -28.8242940267 | -38.7691108147 | -6.3339590861 |
| H | -12.5861729698 | -10.8610537938 | -2.967375778  | H | -29.8781428102 | -40.2146081345 | -6.3328602938 |
| H | -14.0842977388 | -12.684506232  | -3.3820303404 | C | -34.1983321064 | -40.2659675531 | -8.3937267885 |
| C | -11.2045836562 | -14.4479541423 | -3.3030660608 | H | -34.9103963715 | -41.065768262  | -8.5546471691 |

**Table S8.** The coordinate of **4** (240 atoms).

| Atom | Coordinates (Angstroms) |               |               | Atom | Coordinates (Angstroms) |                |               |
|------|-------------------------|---------------|---------------|------|-------------------------|----------------|---------------|
|      | X                       | Y             | Z             |      | X                       | Y              | Z             |
| C    | -17.4888544941          | 0.4395147057  | -0.3649049362 | S    | 7.7208841276            | -11.6757435958 | -3.5663342249 |
| C    | -19.5963519959          | 1.8203202133  | -0.3269201288 | C    | 6.6672747592            | -9.222942113   | -2.7532585442 |
| C    | -18.2021900926          | 1.6457721266  | -0.2550418207 | C    | 9.4729386889            | -11.8010431278 | -3.4583749759 |
| C    | -15.9960331853          | 0.4718619541  | -0.3038718281 | O    | 5.4012188311            | -9.666327186   | -3.0132068493 |
| C    | -15.3150035104          | -0.7182320569 | -0.0202412555 | O    | 10.5934293447           | -7.898933258   | -1.9128549192 |
| C    | -13.9318578128          | -0.7487435138 | 0.0606823165  | C    | 4.926267044             | -9.3125928421  | -4.3064614344 |
| C    | -13.1713051049          | 0.4097543261  | -0.1567034353 | H    | 3.9177455124            | -9.7230867708  | -4.3867026972 |
| C    | -13.8530857029          | 1.594851521   | -0.4747495366 | H    | 4.8897520184            | -8.2230625773  | -4.4309865227 |
| C    | -15.2370475441          | 1.6258700906  | -0.5400044328 | H    | 5.5594756497            | -9.7433304915  | -5.0919867462 |
| H    | -17.6161924315          | 2.5408289149  | -0.1026560435 | C    | 11.2608469858           | -7.3205061293  | -3.027845841  |
| H    | -15.8956987528          | -1.6211097219 | 0.1379802884  | H    | 12.2471211886           | -7.0160787829  | -2.6719705251 |
| H    | -13.4328853863          | -1.6809172567 | 0.313795068   | H    | 11.3730336709           | -8.0464606192  | -3.8429849943 |
| H    | -13.2871357761          | 2.4931847324  | -0.70347986   | H    | 10.7197905824           | -6.4419313072  | -3.4004857894 |
| H    | -15.7240201287          | 2.554525737   | -0.8209256891 | C    | 6.5148048577            | -5.7891377523  | -1.4005793539 |
| C    | -20.163228792           | 3.1921812015  | -0.1436494895 | C    | 4.1783050539            | -2.8031188829  | -0.3904755147 |
| C    | -19.4875491031          | 4.211233839   | 0.5385692051  | C    | 5.4814615764            | -2.4467061365  | -0.1021940778 |
| C    | -21.438036293           | 3.4582823213  | -0.658645367  | C    | 6.4219962624            | -3.4455541897  | -0.4218759799 |
| C    | -20.0646900361          | 5.4680280185  | 0.6851182562  | C    | 5.8596548735            | -4.5834187733  | -0.9618961206 |
| H    | -18.5183827238          | 4.0178533763  | 0.988535761   | S    | 4.1367023508            | -4.4065578502  | -1.0778831315 |
| C    | -22.0098818132          | 4.7171023589  | -0.5214582263 | H    | 5.7336851563            | -1.4873488988  | 0.3294091797  |
| H    | -21.9699071375          | 2.6573043721  | -1.1620428664 | H    | 7.4890979745            | -3.3375732513  | -0.2567437948 |

|    |                |               |               |   |               |                |               |
|----|----------------|---------------|---------------|---|---------------|----------------|---------------|
| C  | -21.3236540718 | 5.7277147001  | 0.148863542   | S | 12.5024664794 | -19.0313261535 | -6.0649312106 |
| H  | -19.5317355128 | 6.2452100562  | 1.2262719283  | C | 15.5365471571 | -17.0941305597 | -4.8571038181 |
| H  | -22.9962418393 | 4.9097560625  | -0.9349676748 | C | 14.2569757893 | -15.104160922  | -4.1673341068 |
| H  | -21.7716555714 | 6.7114899256  | 0.2608112257  | C | 15.4598075165 | -15.818389088  | -4.3235894083 |
| O  | -17.9859212959 | -0.726816766  | -0.4743036667 | H | 14.3258229869 | -14.111582439  | -3.729981676  |
| O  | -20.4596472394 | 0.9211550266  | -0.5787605539 | H | 16.3728007489 | -15.3234738005 | -4.0030763875 |
| Ir | -20.0743509894 | -1.1961570377 | -0.7488090603 | C | 14.2742267341 | -17.655132091  | -5.2553079161 |
| C  | -22.0193184653 | -1.5741883056 | -0.8522122553 | C | 13.0336344019 | -16.9178470727 | -5.0954140315 |
| C  | -22.7892119102 | -1.7300730927 | -2.0080777097 | C | 13.0146635713 | -15.5946865964 | -4.5335345542 |
| C  | -22.6658946489 | -1.6510575609 | 0.4140857393  | N | 11.9685991246 | -17.5981234182 | -5.52004558   |
| C  | -24.1548863359 | -1.9379656576 | -1.9035398142 | N | 14.0939488794 | -18.8617640723 | -5.7925833581 |
| H  | -22.3438095009 | -1.6915488508 | -2.9965568234 | C | 11.7935526943 | -14.8327442658 | -4.3655847891 |
| C  | -24.0478328286 | -1.8611841556 | 0.4546938118  | C | 10.4854518635 | -15.2016453592 | -4.613025279  |
| C  | -24.8164264812 | -2.00610095   | -0.6838518117 | C | 9.5503810028  | -14.1893987498 | -4.3213429511 |
| H  | -25.8852339522 | -2.169785004  | -0.6224048392 | C | 10.1219688363 | -13.0268960285 | -3.8475443767 |
| C  | -21.7953307452 | -1.5121020689 | 1.5723430622  | S | 11.8478322101 | -13.1947659268 | -3.7655786208 |
| C  | -22.1624456795 | -1.5682238327 | 2.9231743939  | H | 10.2256379407 | -16.1800418559 | -4.9943940326 |
| C  | -21.1957148693 | -1.4424000496 | 3.9077711439  | H | 8.4798028893  | -14.3079382553 | -4.453425899  |
| H  | -23.2012665169 | -1.7126253222 | 3.1837792401  | C | 25.3862396106 | -19.0819329074 | -4.2826228561 |
| C  | -19.5526781793 | -1.2105993579 | 2.1978476474  | C | 25.1815821717 | -17.7705775494 | -3.7751946353 |
| C  | -19.8625382697 | -1.2626501262 | 3.545452467   | C | 22.8281033047 | -17.9280255045 | -4.160507535  |
| H  | -21.4820015933 | -1.4872171958 | 4.9547530841  | C | 23.0317606755 | -19.2419501727 | -4.6617258664 |
| H  | -18.5387894722 | -1.0777349213 | 1.8367141614  | C | 24.284841739  | -19.8340006058 | -4.7208395199 |
| H  | -19.0759082433 | -1.1639412354 | 4.2854570471  | C | 26.7651769235 | -19.4448599467 | -4.2722002052 |
| C  | -19.2966507272 | -2.3163472564 | -3.3155383105 | H | 27.1287521943 | -20.3947286789 | -4.6490827876 |
| C  | -19.8513466322 | -0.0424815531 | -3.5005261929 | C | 21.4560477489 | -17.5447433492 | -4.2204548913 |
| C  | -18.9916527403 | -2.3511060185 | -4.6822355035 | S | 21.535104045  | -19.9639924168 | -5.1826709829 |
| C  | -19.5659307915 | -0.0249195793 | -4.8544653608 | H | 21.1019870208 | -16.5662454415 | -3.9144571576 |
| H  | -20.202928042  | 0.8332957215  | -2.9661520362 | S | 26.6833900444 | -17.0309309032 | -3.2963990855 |
| C  | -19.1255434413 | -1.2051366562 | -5.449479616  | C | 23.9260423246 | -17.186491271  | -3.6963629314 |
| H  | -18.6560198573 | -3.2774227761 | -5.1260945249 | C | 27.582750153  | -18.4663434846 | -3.7738162157 |
| H  | -19.6871052743 | 0.8918568661  | -5.4209626006 | O | 23.7727378089 | -15.9161421711 | -3.2168601229 |
| H  | -18.8890883727 | -1.2340891081 | -6.509369786  | O | 24.4432243215 | -21.0944874485 | -5.2242524982 |
| C  | -19.2404629216 | -3.4213455612 | -2.3696117565 | C | 23.4492643107 | -15.8624912472 | -1.832778292  |
| C  | -18.8527995199 | -4.7310798688 | -2.6694433644 | H | 23.3637577321 | -14.8043371715 | -1.5777234603 |
| C  | -19.6326331631 | -3.108610386  | -1.037035809  | H | 22.4966071803 | -16.367044121  | -1.6280951192 |
| C  | -18.8419553365 | -5.7420561024 | -1.7281237374 | H | 24.2377874794 | -16.3223246622 | -1.2243143586 |
| C  | -19.6341572642 | -4.128918986  | -0.082094217  | C | 24.4232258974 | -22.1124616157 | -4.2310313614 |
| C  | -19.2420286366 | -5.4084574087 | -0.4402822405 | H | 24.5502194918 | -23.0597882634 | -4.7587875898 |
| H  | -18.5384589782 | -6.748390596  | -1.9891352932 | H | 25.2415762218 | -21.9805135047 | -3.5120651112 |
| H  | -19.9358319668 | -3.9459624616 | 0.9438419049  | H | 23.467949461  | -22.1201067565 | -3.6916853206 |
| N  | -19.7188768667 | -1.1482130794 | -2.7555087767 | C | 20.6400962416 | -18.5168116782 | -4.7338089953 |
| N  | -20.485839937  | -1.3280651815 | 1.2435763586  | C | 16.7901030106 | -17.8070814888 | -4.999710839  |
| F  | -19.2437481114 | -6.3745463378 | 0.487158712   | C | 17.04061502   | -19.0422598888 | -5.5654279795 |

|   |                |               |               |   |               |                |               |
|---|----------------|---------------|---------------|---|---------------|----------------|---------------|
| F | -18.4676725136 | -5.0572078705 | -3.9179288247 | C | 18.3994230551 | -19.412016764  | -5.5311795255 |
| F | -24.6903776557 | -1.9311298678 | 1.6360763363  | C | 19.2149249215 | -18.4703485802 | -4.9389516413 |
| F | -24.8800601007 | -2.0804571469 | -3.0203208783 | S | 18.2770638048 | -17.1082170278 | -4.4113479349 |
| C | -9.5025609661  | 1.0989910052  | 0.2378766743  | H | 16.2539406472 | -19.6508514438 | -5.9908407841 |
| C | -9.3039926509  | -0.2782576045 | -0.0479494708 | H | 18.7761293855 | -20.3451945667 | -5.9372792027 |
| C | -6.9329973278  | -0.0272872001 | 0.1262028809  | S | 35.7269116697 | -17.918393383  | -2.4935091489 |
| C | -7.1329684464  | 1.3479764516  | 0.4231515576  | C | 35.2075911371 | -21.3943539989 | -3.9309008231 |
| C | -8.3942061308  | 1.9207154446  | 0.4945980499  | C | 32.7676186589 | -21.1573042948 | -4.1822034071 |
| C | -10.8868404521 | 1.4493764396  | 0.2192964692  | C | 33.9660962528 | -21.8865432948 | -4.2974433262 |
| H | -11.243013403  | 2.4523612183  | 0.4242417556  | H | 31.8562070736 | -21.651170671  | -4.508837586  |
| C | -5.5480555838  | -0.3685018494 | 0.1012550813  | H | 33.8937969893 | -22.8944124626 | -4.6976395201 |
| S | -5.6183078654  | 2.1758982864  | 0.6548288864  | C | 35.1914498635 | -20.0554544263 | -3.4074195917 |
| H | -5.1905716777  | -1.3676975593 | -0.1227222886 | C | 33.9549646783 | -19.3037144212 | -3.2870864023 |
| S | -10.8169175769 | -1.0883755432 | -0.3367033049 | C | 32.6935765633 | -19.866899339  | -3.6850604121 |
| C | -8.0422661942  | -0.8560190399 | -0.0988909265 | N | 34.1377378636 | -18.0835131633 | -2.7821790236 |
| C | -11.7132396697 | 0.3985387323  | -0.062072725  | N | 36.2563394034 | -19.3710431442 | -2.9891296757 |
| O | -7.8818850296  | -2.1803911436 | -0.3947973623 | C | 31.4427059383 | -19.1436644092 | -3.5729703662 |
| O | -8.5497972694  | 3.2511503408  | 0.7685832221  | C | 31.2106544131 | -17.8458180999 | -3.1605126913 |
| C | -7.8757067046  | -3.0249351967 | 0.7493804085  | C | 29.8503582053 | -17.4808318017 | -3.188883688  |
| H | -7.7494004498  | -4.0441870559 | 0.378930464   | C | 29.0151475966 | -18.4895103186 | -3.621651853  |
| H | -7.0458206477  | -2.7732545443 | 1.4218006218  | S | 29.9343805401 | -19.9144010243 | -3.9929999367 |
| H | -8.8211890122  | -2.9521377509 | 1.3009652816  | H | 32.0119846495 | -17.1883123082 | -2.8511079859 |
| C | -8.7124580774  | 3.5315638799  | 2.1530898228  | H | 29.4883858985 | -16.4980459745 | -2.9047434702 |
| H | -8.8172322738  | 4.6151328048  | 2.237824295   | C | 41.3198188856 | -29.0613384211 | -6.2057839177 |
| H | -9.6105243828  | 3.043650317   | 2.5526657503  | C | 39.9889693219 | -29.4815279474 | -6.4691899384 |
| H | -7.8383685669  | 3.2036511832  | 2.7293061345  | C | 39.123680409  | -27.3621901274 | -5.7796140872 |
| S | 3.4725062357   | 1.478421988   | 1.0902630638  | C | 40.455788752  | -26.9405083915 | -5.5222560668 |
| C | 2.9520343571   | -2.0556591516 | -0.1967539939 | C | 41.5540699413 | -27.7605952552 | -5.7365821502 |
| C | 0.4952450602   | -1.8880446478 | -0.289257992  | C | 42.267336418  | -30.1054170758 | -6.472735595  |
| C | 1.7025644234   | -2.5906942127 | -0.4621149784 | H | 43.3341415602 | -29.9993167103 | -6.3138491802 |
| H | -0.4223475146  | -2.415863934  | -0.5355940243 | C | 38.1748243986 | -26.3437474174 | -5.4627691357 |
| H | 1.6308373118   | -3.6134205844 | -0.8227830167 | S | 40.5014647853 | -25.3101875919 | -4.9108380997 |
| C | 2.93505803     | -0.7009043076 | 0.2838852035  | H | 37.1034317754 | -26.4849979693 | -5.5557500185 |
| C | 1.689542818    | 0.023810869   | 0.4627635897  | S | 39.944519955  | -31.1302724134 | -7.0322297712 |
| C | 0.4199475658   | -0.583241474  | 0.1687853159  | C | 38.8905850863 | -28.652746372  | -6.2747446527 |
| N | 1.8728388345   | 1.2645860552  | 0.9146431191  | O | 37.622454404  | -29.0969176658 | -6.5236889578 |
| N | 4.0067339004   | 0.0231877209  | 0.6072397954  | O | 42.818944927  | -27.3205476936 | -5.4609675632 |
| C | -4.7213637865  | 0.6884349408  | 0.3695446083  | C | 37.155619303  | -28.7884519223 | -7.8308981198 |
| C | -0.8396245324  | 0.1130041051  | 0.3388798923  | H | 36.1454416664 | -29.1968145043 | -7.9014975032 |
| C | -1.0791854834  | 1.415270743   | 0.7325188565  | H | 37.1250721549 | -27.7038757297 | -7.9950917879 |
| C | -2.4477633674  | 1.7463069581  | 0.7797240985  | H | 37.7903860346 | -29.2504743986 | -8.5972173389 |
| C | -3.281568246   | 0.7062871717  | 0.4259015624  | C | 43.4951894563 | -26.7852756697 | -6.5910543415 |
| S | -2.3502791277  | -0.7023249011 | 0.0246655435  | H | 44.4797329603 | -26.4694999381 | -6.2399986498 |
| H | -0.277676226   | 2.0988469305  | 0.9784460223  | H | 43.6118816969 | -27.5406665702 | -7.3784754209 |

|   |               |                |               |   |               |                |               |
|---|---------------|----------------|---------------|---|---------------|----------------|---------------|
| H | -2.8174170908 | 2.7239122163   | 1.0716836799  | H | 42.9588496489 | -25.9200480928 | -7.0003206863 |
| C | 9.0967991977  | -9.625440473   | -2.6912920005 | C | 38.7471232921 | -25.193426345  | -4.9931734297 |
| C | 7.7660914629  | -10.0425519358 | -2.964160351  | C | 36.4253630535 | -22.1681216827 | -4.0665974915 |
| C | 6.896934768   | -7.940942817   | -2.2292664616 | C | 37.7164641945 | -21.8504645607 | -3.6922455375 |
| C | 8.2281924057  | -7.5207068339  | -1.9640213475 | C | 38.6511142483 | -22.8657755634 | -3.9765929766 |
| C | 9.328770502   | -8.3328244323  | -2.1950408899 | C | 38.0957675575 | -23.9779052628 | -4.573547903  |
| C | 10.0432948796 | -10.652203535  | -2.9795269389 | S | 36.3887506776 | -23.754343628  | -4.7935582479 |
| H | 11.1088802935 | -10.5369347401 | -2.8131455327 | H | 37.964311789  | -20.9077499586 | -3.2230680168 |
| C | 5.9461573225  | -6.9330708542  | -1.892914216  | H | 39.7075505668 | -22.7906059141 | -3.7402807998 |
| S | 8.2688272615  | -5.9044005278  | -1.3169731971 | C | 41.6758082359 | -31.241781637  | -6.9174210415 |
| H | 4.8754259215  | -7.07336408    | -1.9945180628 | H | 42.1604925979 | -32.1737514903 | -7.1801168585 |

**Table S9.** The coordinate of **5** (240 atoms).

| Atom | Coordinates (Angstroms) |               |               | Atom | Coordinates (Angstroms) |                |                |
|------|-------------------------|---------------|---------------|------|-------------------------|----------------|----------------|
|      | X                       | Y             | Z             |      | X                       | Y              | Z              |
| C    | -17.3436777077          | 0.0755734334  | 1.2564764285  | C    | 10.021384871            | -10.4746378427 | -7.0921227798  |
| C    | -19.6185899062          | 1.1524759423  | 1.1575868851  | O    | 5.8534238893            | -8.4810334904  | -7.0333322128  |
| C    | -18.2393780399          | 1.0933697967  | 0.8861568691  | O    | 10.6893806099           | -6.9286198592  | -4.6882917665  |
| C    | -15.9181440967          | 0.1739389238  | 0.8198635671  | C    | 5.6390855052            | -7.9627533796  | -8.3409675152  |
| C    | -14.9543199974          | -0.5742668835 | 1.5062006827  | H    | 4.6740353418            | -8.3517691403  | -8.671376392   |
| C    | -13.6175536742          | -0.5212180175 | 1.1439949384  | H    | 5.6091692182            | -6.8659073934  | -8.3306820572  |
| C    | -13.1932455721          | 0.2685011422  | 0.0648955271  | H    | 6.4225106734            | -8.2955196492  | -9.0328591905  |
| C    | -14.1655147501          | 0.9928136382  | -0.6426770062 | C    | 11.4950811965           | -6.0854598305  | -5.503440803   |
| C    | -15.4988011429          | 0.9520063836  | -0.2673133115 | H    | 12.3877802999           | -5.8547363953  | -4.9189167618  |
| H    | -17.8247647668          | 1.9216671858  | 0.3292182491  | H    | 11.7848683812           | -6.5937371395  | -6.4317976212  |
| H    | -15.2763580319          | -1.2000059603 | 2.3321770741  | H    | 10.9706291893           | -5.1544274051  | -5.750975844   |
| H    | -12.8882887993          | -1.0902349502 | 1.7153101133  | C    | 6.5036614239            | -4.9749952709  | -4.5667439828  |
| H    | -13.8747219552          | 1.5685046248  | -1.5164413594 | C    | 3.8514242987            | -2.2372024631  | -3.5567987382  |
| H    | -16.2243255325          | 1.4999309625  | -0.8605673204 | C    | 5.0222133045            | -1.9731236134  | -2.8929227354  |
| C    | -20.3904172346          | 2.3561825881  | 0.7200632157  | C    | 6.057665834             | -2.8911979896  | -3.1830320278  |
| C    | -19.7922602437          | 3.6011318824  | 0.4906998965  | C    | 5.708699092             | -3.8850713865  | -4.0627041357  |
| C    | -21.7761257657          | 2.2352250864  | 0.5578075148  | S    | 4.0585149465            | -3.648009169   | -4.5581237268  |
| C    | -20.558264897           | 4.69117023    | 0.0918118475  | S    | 14.5633188782           | -15.6180271682 | -11.4853192513 |
| H    | -18.7270750479          | 3.7336391012  | 0.6549420488  | C    | 16.5727969052           | -15.1758504854 | -8.3107968402  |
| C    | -22.5395870204          | 3.3216846716  | 0.1487802803  | C    | 14.8625932847           | -13.8621882485 | -7.1338037425  |
| H    | -22.2392129428          | 1.2755669253  | 0.7640890262  | C    | 16.1318786779           | -14.4821312932 | -7.20068331    |
| C    | -21.9325207356          | 4.5533108501  | -0.0883473477 | H    | 14.5899195947           | -13.353811058  | -6.2129080892  |
| H    | -20.0808031439          | 5.6534732755  | -0.0722322337 | H    | 16.789559322            | -14.394402762  | -6.3401077033  |
| H    | -23.6125738137          | 3.2089232801  | 0.0185796935  | C    | 15.6623682076           | -15.2399187442 | -9.4150430915  |
| H    | -22.5291299165          | 5.4051288571  | -0.4038488884 | C    | 14.3731902318           | -14.5883653301 | -9.3544588469  |
| O    | -17.6052992392          | -0.9393096268 | 1.9780910063  | C    | 13.9565075188           | -13.8882540029 | -8.1760899347  |
| O    | -20.317550252           | 0.249193341   | 1.7161712197  | N    | 13.6649626962           | -14.7176595842 | -10.4761684244 |
| Ir   | -19.5694083466          | -1.5546160159 | 2.6362230505  | N    | 15.8784797623           | -15.8727598817 | -10.5679803245 |
| C    | -21.3800504961          | -1.9850163842 | 3.3229284782  | C    | 12.6688104356           | -13.2186238795 | -8.0973729679  |

|   |                |               |               |   |               |                |               |
|---|----------------|---------------|---------------|---|---------------|----------------|---------------|
| C | -22.3349884218 | -2.8123440432 | 2.7259068748  | C | 11.4369401098 | -13.6176909979 | -8.5491991329 |
| C | -21.7128410064 | -1.3272667719 | 4.5411768668  | C | 10.4003540283 | -12.7040433428 | -8.249829706  |
| C | -23.5798712703 | -2.9639095164 | 3.3146439678  | C | 10.8040842276 | -11.591294589  | -7.555268339  |
| H | -22.1280814721 | -3.3452743736 | 1.8039027113  | S | 12.5214339213 | -11.6791135369 | -7.2949907426 |
| C | -22.9864856216 | -1.5184121086 | 5.085833403   | C | 24.6540154316 | -20.2257526595 | -5.0520365584 |
| C | -23.93859922   | -2.3268743968 | 4.4959469474  | C | 23.7660340832 | -20.0603560205 | -3.9552712991 |
| H | -24.91717133   | -2.4582478506 | 4.9410118237  | C | 22.2016801243 | -18.8944552734 | -5.3352526367 |
| C | -20.6576881258 | -0.5086632028 | 5.1201697521  | C | 23.0890638529 | -19.0612556435 | -6.4323084029 |
| C | -20.7069684805 | 0.2219866563  | 6.3143234586  | C | 24.3011840043 | -19.7267189605 | -6.3153190096 |
| C | -19.5942520566 | 0.9313514945  | 6.7367469067  | C | 25.8449270836 | -20.9083948708 | -4.6687438601 |
| H | -21.6166586947 | 0.2212476254  | 6.8976509254  | H | 26.6573119387 | -21.1084945295 | -5.3591505499 |
| C | -18.4357283622 | 0.176958009   | 4.7962757312  | C | 21.0332588327 | -18.1680952575 | -5.7074625971 |
| C | -18.4315926608 | 0.9110026715  | 5.9693341708  | S | 22.4675737755 | -18.3222369322 | -7.8806658106 |
| H | -19.6338050328 | 1.4962712211  | 7.6638071648  | H | 20.2481313206 | -17.9141940115 | -5.0033220793 |
| H | -17.5703167256 | 0.1074038894  | 4.1464860077  | S | 24.4176563357 | -20.7420584738 | -2.4919505948 |
| H | -17.53882701   | 1.4497740367  | 6.2673505844  | C | 22.5435705882 | -19.4149118857 | -4.0775220146 |
| C | -19.1634894109 | -3.9468216386 | 1.0347348523  | C | 25.8691136741 | -21.2558023008 | -3.3447750868 |
| C | -20.1567843656 | -2.229144763  | -0.2198027244 | O | 21.7159343576 | -19.2551017569 | -3.0025184167 |
| C | -19.1556512716 | -4.7682882177 | -0.0997944365 | O | 25.1423016988 | -19.8598190678 | -7.3835233995 |
| C | -20.1746594073 | -3.0011864597 | -1.3680828488 | C | 20.7904318843 | -20.3216641928 | -2.8281870848 |
| H | -20.5416024579 | -1.2157585006 | -0.1916663212 | H | 20.2027000683 | -20.0766051089 | -1.9414246578 |
| C | -19.6602145417 | -4.2941239339 | -1.2998743283 | H | 20.1253721214 | -20.4128122475 | -3.6962574504 |
| H | -18.7548074092 | -5.7690413619 | -0.0253914012 | H | 21.3090685833 | -21.2750701225 | -2.6695860828 |
| H | -20.5811890853 | -2.5939764952 | -2.2873240193 | C | 24.9187703324 | -21.0410825388 | -8.1445604137 |
| H | -19.6535667512 | -4.9326718881 | -2.1786842825 | H | 25.6410387165 | -21.0206568086 | -8.962938442  |
| C | -18.6975778601 | -4.284073492  | 2.3719165355  | H | 25.0792591102 | -21.9393273333 | -7.535032843  |
| C | -18.1467952828 | -5.5103144747 | 2.7575228984  | H | 23.9021802224 | -21.0613678382 | -8.556004726  |
| C | -18.8395330902 | -3.2569593241 | 3.347695441   | C | 21.0201671117 | -17.8002280733 | -7.026109304  |
| C | -17.737834257  | -5.7729767703 | 4.0505823768  | C | 17.8696478585 | -15.8312675    | -8.3481378719 |
| C | -18.4356884046 | -3.5188109829 | 4.6597060983  | C | 18.7832763071 | -15.9232254836 | -9.3668110693 |
| C | -17.8979229686 | -4.7543432066 | 4.9815126149  | C | 19.9619592025 | -16.6175428743 | -9.009757484  |
| H | -17.3159696718 | -6.732973173  | 4.321498898   | C | 19.9892563286 | -17.0655693022 | -7.7127905452 |
| H | -18.5310067754 | -2.7742696235 | 5.442983324   | S | 18.4976414962 | -16.6287018012 | -6.932080345  |
| N | -19.6666586474 | -2.6840756211 | 0.9413162248  | S | 30.5680206342 | -26.9299118287 | 0.1175722988  |
| N | -19.5113528125 | -0.5072117084 | 4.384060306   | C | 32.9555666938 | -25.1236568751 | -2.1947910097 |
| F | -17.5113005812 | -4.9887486773 | 6.2420886884  | C | 31.371550742  | -23.3574224973 | -2.8319000062 |
| F | -17.9935915936 | -6.5001784504 | 1.8574804784  | C | 32.6390535083 | -23.980910954  | -2.9030064748 |
| F | -23.3344692139 | -0.9042418848 | 6.232770492   | H | 31.2145565427 | -22.4504568988 | -3.4094988769 |
| F | -24.4861053314 | -3.7564839202 | 2.7282343198  | H | 33.3887105335 | -23.5427230318 | -3.5562957057 |
| C | -9.777161774   | 1.0831076172  | -1.2627598285 | C | 31.917335955  | -25.6571631207 | -1.3642887115 |
| C | -9.3601411369  | -0.1505393592 | -0.6939865318 | C | 30.6156204195 | -25.0309868587 | -1.3065570186 |
| C | -7.135246004   | 0.1692620372  | -1.5055009195 | C | 30.3376409895 | -23.8413206382 | -2.0544714433 |
| C | -7.5498219786  | 1.4062201545  | -2.0672914284 | N | 29.7581536469 | -25.6711098473 | -0.5117733436 |
| C | -8.8485168922  | 1.8809655585  | -1.9473560134 | N | 32.0181905025 | -26.7342201116 | -0.5855286932 |

|   |                |               |               |   |               |                |                |
|---|----------------|---------------|---------------|---|---------------|----------------|----------------|
| C | -11.1654392866 | 1.3281791658  | -1.0349965898 | C | 29.0320503024 | -23.2026508122 | -2.0205072683  |
| H | -11.6688167542 | 2.2223275408  | -1.3839758275 | C | 28.1857143554 | -22.9807841635 | -0.9647719103  |
| C | -5.7635940457  | -0.1026377368 | -1.7830523605 | C | 27.0063275565 | -22.2867683071 | -1.3204554494  |
| S | -6.2511226027  | 2.195730291   | -2.9159427606 | C | 26.9204340592 | -21.9516719527 | -2.6486125057  |
| H | -5.2670903236  | -1.0130692567 | -1.4646273956 | S | 28.336449495  | -22.5365508892 | -3.4720997666  |
| S | -10.6844502206 | -0.9667455578 | 0.086204624   | C | 42.9804806214 | -25.8188796551 | -2.9016116878  |
| C | -8.0561848344  | -0.615308583  | -0.7944254746 | C | 42.6346029166 | -24.4410741387 | -2.8727316671  |
| C | -11.7878475536 | 0.3378866386  | -0.3290570256 | C | 40.3122619506 | -24.9738816007 | -2.6855744363  |
| O | -7.688462393   | -1.8155325968 | -0.254587444  | C | 40.658206376  | -26.3509963972 | -2.7094720902  |
| O | -9.2193662613  | 3.0675178412  | -2.515221803  | C | 41.9722828355 | -26.7880743192 | -2.8053936242  |
| C | -7.2057463165  | -1.7177494085 | 1.0796947785  | C | 44.3961190274 | -26.0069038779 | -3.0437011738  |
| H | -6.9611493576  | -2.7343692317 | 1.3938720754  | H | 44.8655039964 | -26.9814642555 | -3.1101007989  |
| H | -6.3058536897  | -1.0915771698 | 1.1295442824  | C | 38.9011352282 | -24.7859731218 | -2.5945578346  |
| H | -7.97015082    | -1.3033007213 | 1.748480206   | S | 39.2501942706 | -27.3708348594 | -2.6204799803  |
| C | -9.0920691424  | 4.1831314053  | -1.6422104867 | H | 38.436552249  | -23.8056791236 | -2.5880252856  |
| H | -9.4085667308  | 5.058290282   | -2.2131708044 | S | 44.0471835713 | -23.4307097318 | -3.0206488328  |
| H | -9.7333234253  | 4.069284107   | -0.7589725478 | C | 41.3213132944 | -24.0028906119 | -2.75558453    |
| H | -8.0526369702  | 4.3163165753  | -1.3177101718 | O | 41.0166231851 | -22.6708008068 | -2.7468233185  |
| S | 2.8506672111   | 2.2110287009  | -3.332287733  | O | 42.2646588687 | -28.122753722  | -2.8441314304  |
| C | 2.5677488318   | -1.5576936531 | -3.5010702503 | C | 40.9996559136 | -22.0967262321 | -1.4457442465  |
| C | 0.1112146321   | -1.6061587696 | -3.5113988553 | H | 40.7552039091 | -21.0408934305 | -1.578310017   |
| C | 1.3712753063   | -2.2474851912 | -3.5317631442 | H | 40.2393765118 | -22.5728968163 | -0.8136160759  |
| H | -0.7790745823  | -2.2272777685 | -3.5602744019 | H | 41.9790393848 | -22.1859635493 | -0.959727209   |
| H | 1.3913501921   | -3.3335529655 | -3.5621571716 | C | 42.5627975309 | -28.6798154077 | -1.5703285136  |
| C | 2.4688020052   | -0.1295916559 | -3.4455892112 | H | 42.770943379  | -29.7383636924 | -1.7383875045  |
| C | 1.1803520703   | 0.5251390694  | -3.4025513399 | H | 43.4425793007 | -28.1992538956 | -1.123899829   |
| C | -0.0338899685  | -0.2338493952 | -3.4483850657 | H | 41.7118500736 | -28.5800487445 | -0.8850748934  |
| N | 1.2673451509   | 1.8525782599  | -3.3197112899 | C | 38.2001368216 | -25.9600252934 | -2.5442937268  |
| N | 3.4931046314   | 0.7230523629  | -3.4291500493 | C | 34.2729061787 | -25.7345383941 | -2.2607876909  |
| C | -5.1534012537  | 0.8792186743  | -2.516269859  | C | 34.6291393455 | -27.0576103231 | -2.3112683133  |
| C | -1.3394887709  | 0.4029815924  | -3.4003000876 | C | 36.0240962288 | -27.2654558853 | -2.4133230002  |
| C | -1.7869004051  | 1.5480059486  | -4.0083058972 | C | 36.7706883158 | -26.1146496143 | -2.451650481   |
| C | -3.1495333237  | 1.8284643635  | -3.7561417022 | S | 35.7045731759 | -24.7449445815 | -2.3389782226  |
| C | -3.7840785984  | 0.9065499566  | -2.9618561235 | C | 45.0712355267 | -24.8331169046 | -3.1119453275  |
| S | -2.6434376532  | -0.3228930448 | -2.5008002442 | H | 46.1390627179 | -24.6964436108 | -3.2283960878  |
| C | 9.4279313709   | -8.478220489  | -6.0366829073 | F | -3.7441207841 | 2.8977825459   | -4.2786791976  |
| C | 8.1878049944   | -8.8500020271 | -6.6221080182 | F | -1.074916838  | 2.3189790446   | -4.8151914131  |
| C | 7.1171443968   | -6.9258877901 | -5.6935028974 | F | 7.2562078615  | -2.7844421109  | -2.6158593319  |
| C | 8.3574612535   | -6.5535856856 | -5.108861971  | F | 5.2032164958  | -1.0064023908  | -2.0070352812  |
| C | 9.514196361    | -7.3017526607 | -5.276320029  | F | 9.1420493197  | -12.9428052019 | -8.609343479   |
| C | 10.4517053413  | -9.427919286  | -6.3217109483 | F | 11.1748376432 | -14.7646995869 | -9.1556205078  |
| H | 11.4628081183  | -9.3372795145 | -5.9394066672 | F | 18.6543304807 | -15.3799945684 | -10.5670037601 |
| C | 6.080300659    | -6.0058966402 | -5.3619057642 | F | 20.9541156412 | -16.789363547  | -9.8791125256  |
| S | 8.2141969474   | -5.0942419152 | -4.1705986178 | F | 26.0817232661 | -21.9824693522 | -0.4135987219  |



|   |              |                |               |   |               |                |               |
|---|--------------|----------------|---------------|---|---------------|----------------|---------------|
| H | 5.0533177803 | -6.1321831076  | -5.687620068  | F | 28.4270318913 | -23.3074483601 | 0.2951395934  |
| S | 8.3134170224 | -10.3493002325 | -7.4976321062 | F | 33.7876784759 | -28.0795338362 | -2.3291636675 |
| C | 7.0364221304 | -8.0897862107  | -6.4735394004 | F | 36.5377916059 | -28.4908140243 | -2.48157187   |

**Table S10.** The coordinate of **6** (198 atoms).

| Atom | Coordinates (Angstroms) |               |               | Atom | Coordinates (Angstroms) |                |               |
|------|-------------------------|---------------|---------------|------|-------------------------|----------------|---------------|
|      | X                       | Y             | Z             |      | X                       | Y              | Z             |
| C    | -2.1211563903           | -1.0367020597 | 0.0254189704  | N    | -9.3703927897           | -13.7014092975 | -1.954875816  |
| C    | -1.8937994827           | 1.4301231214  | 0.4802046668  | N    | -10.9621988697          | -15.567812921  | -2.3481300843 |
| C    | -2.6302377062           | 0.2485845949  | 0.2763395953  | C    | -14.7931484216          | -17.36979069   | -3.1126454323 |
| C    | -3.0703305184           | -2.182264343  | -0.1267096546 | C    | -15.9782564433          | -16.591973948  | -3.1884919824 |
| C    | -2.5917952035           | -3.3636287638 | -0.7068484787 | C    | -17.2801737891          | -18.5341739362 | -3.6873010531 |
| C    | -3.4224749347           | -4.4568691858 | -0.8931670818 | C    | -16.0935625784          | -19.3121927136 | -3.6018693648 |
| C    | -4.7664787132           | -4.4162088209 | -0.494303403  | C    | -14.8569506022          | -18.7603493106 | -3.3083809104 |
| C    | -5.237867298            | -3.2439147962 | 0.1167000971  | C    | -13.6481474657          | -16.5680573732 | -2.8453942266 |
| C    | -4.4072582632           | -2.1479729054 | 0.2918922818  | H    | -12.6447985553          | -16.9642056228 | -2.776683266  |
| H    | -3.7053011684           | 0.3412722528  | 0.3297196197  | C    | -18.4167133476          | -19.3300467006 | -4.0149631386 |
| H    | -1.5514047458           | -3.4035054396 | -1.0121665104 | S    | -16.4100902556          | -20.9923149448 | -3.9210880129 |
| H    | -3.0302865045           | -5.3492517549 | -1.3745612808 | H    | -19.4125062196          | -18.9292524782 | -4.1485817367 |
| H    | -6.2594816957           | -3.2055898595 | 0.483746479   | S    | -15.6553909795          | -14.9062856004 | -2.9242524382 |
| H    | -4.8035721539           | -1.2721490968 | 0.7960647282  | C    | -17.2200044654          | -17.1496487083 | -3.4627164894 |
| C    | -2.6311131408           | 2.7118320793  | 0.7060444755  | C    | -13.9303974195          | -15.2308862071 | -2.711148668  |
| C    | -3.9533567409           | 2.9146527377  | 0.2924153666  | C    | -18.1253087405          | -20.6600596826 | -4.1699496023 |
| C    | -1.9558668056           | 3.7636284874  | 1.3377713346  | O    | -18.3349395416          | -16.36726489   | -3.5531537073 |
| C    | -4.5882607172           | 4.1305555381  | 0.5215398653  | O    | -13.7393772837          | -19.5430200417 | -3.255740401  |
| H    | -4.4848669566           | 2.1331053162  | -0.2420738776 | C    | -19.0822841677          | -16.2870203956 | -2.3455874785 |
| C    | -2.5936595093           | 4.9747514247  | 1.575940357   | H    | -19.9310688407          | -15.6325814864 | -2.5531738313 |
| H    | -0.9220323245           | 3.6123474989  | 1.6311253257  | H    | -19.4479091731          | -17.275129974  | -2.0396614155 |
| C    | -3.9136869367           | 5.1616363335  | 1.1709877916  | H    | -18.479379552           | -15.8573799306 | -1.5360129138 |
| H    | -5.6113995652           | 4.2752580385  | 0.1851772229  | C    | -13.3702692596          | -19.9297005033 | -1.9376910103 |
| H    | -2.0580488178           | 5.7776970896  | 2.0753053494  | H    | -12.4755526308          | -20.547181345  | -2.0382353855 |
| H    | -4.4123005768           | 6.1100033363  | 1.3527138684  | H    | -13.1432830996          | -19.0550001028 | -1.3158792727 |
| O    | -0.8976757323           | -1.3468496305 | -0.1347287768 | H    | -14.1669325562          | -20.5149708122 | -1.4618330298 |
| O    | -0.6275093983           | 1.5323237732  | 0.533295637   | S    | -22.6757859624          | -20.7730819687 | -4.7913779094 |
| Ir   | 0.7941362418            | -0.0274036414 | 0.0752199339  | C    | -20.7786961197          | -24.0405195197 | -5.2165045324 |
| C    | 2.2901941845            | 1.2733240825  | 0.1428786384  | C    | -18.5597970847          | -23.0337413628 | -4.722114054  |
| C    | 3.1233728709            | 1.5489055882  | 1.2305748669  | C    | -19.4075022832          | -24.1059268117 | -5.0542216718 |
| C    | 2.47318624              | 2.0124779379  | -1.060467821  | C    | -21.2972792048          | -22.711340912  | -5.0116273916 |
| C    | 4.0902840115            | 2.5354937687  | 1.1258775701  | C    | -20.4401419574          | -21.5893662872 | -4.6656884605 |
| H    | 3.0335869265            | 1.0076206942  | 2.1663560625  | C    | -19.0182392863          | -21.7494626962 | -4.5138725578 |
| C    | 3.4650278647            | 2.997464423   | -1.1043222869 | N    | -21.1096369683          | -20.4491793151 | -4.5148423386 |
| C    | 4.2850714544            | 3.2815695739  | -0.0297375479 | N    | -22.5788988516          | -22.3629353147 | -5.1108958324 |
| H    | 5.0465481573            | 4.0491617288  | -0.092268636  | C    | -23.5118371708          | -26.4668393629 | -6.0286223894 |

|   |               |                |               |   |                |                |               |
|---|---------------|----------------|---------------|---|----------------|----------------|---------------|
| C | 1.5976593562  | 1.6431741491   | -2.1629464085 | C | -22.4941787449 | -27.4498884027 | -6.1436996821 |
| C | 1.5805210215  | 2.1877732454   | -3.4535647541 | C | -24.112460947  | -29.1408187481 | -6.629521956  |
| C | 0.7006845101  | 1.6913422923   | -4.4016205733 | C | -25.1295727812 | -28.1537247923 | -6.5221284165 |
| H | 2.2606127318  | 2.9913477967   | -3.6972604665 | C | -24.8552854997 | -26.8256738541 | -6.237029001  |
| C | -0.107950812  | 0.1503498716   | -2.7743491412 | C | -22.98024896   | -25.1905602339 | -5.6898795564 |
| C | -0.1598037841 | 0.6490181965   | -4.064027182  | H | -23.5899399372 | -24.3120860229 | -5.5319586707 |
| H | 0.6898638024  | 2.1141212987   | -5.4022598566 | C | -24.6480669844 | -30.4301379104 | -6.9175792589 |
| H | -0.7415805888 | -0.6631026243  | -2.4386587295 | S | -26.7080157527 | -28.8376506458 | -6.7809686708 |
| H | -0.8581665166 | 0.2280350924   | -4.7789885195 | H | -24.0441154768 | -31.3218416372 | -7.0184349667 |
| C | 1.7009619621  | -1.8174755169  | 2.1780459057  | S | -20.921234089  | -26.7827562166 | -5.83535809   |
| C | 0.3515596007  | -0.0967882269  | 3.033167797   | C | -22.7692099957 | -28.7761349059 | -6.4494980041 |
| C | 1.8218699295  | -2.3590535177  | 3.4643354493  | C | -21.6135722718 | -25.1800299619 | -5.5561088936 |
| C | 0.4427009234  | -0.589360524   | 4.3230703211  | C | -26.0132449547 | -30.4405743139 | -7.0335088582 |
| H | -0.2070730741 | 0.7998458555   | 2.7880104591  | O | -21.7675851591 | -29.7002734081 | -6.5327523479 |
| C | 1.1912139501  | -1.745183164   | 4.5346261276  | O | -25.8665136557 | -25.9150272577 | -6.1243775586 |
| H | 2.4115832419  | -3.2529409387  | 3.6093968187  | C | -21.2654377601 | -29.8844522857 | -7.8506195137 |
| H | -0.0616015504 | -0.076676601   | 5.1348216785  | H | -20.4729141185 | -30.6315436729 | -7.7756660581 |
| H | 1.2866949594  | -2.166107776   | 5.5315283169  | H | -22.0500690569 | -30.2489855097 | -8.5253332597 |
| C | 2.3132205491  | -2.3074037206  | 0.9515294183  | H | -20.8503424581 | -28.9504200054 | -8.2491289775 |
| C | 3.1364922803  | -3.4328262969  | 0.846249565   | C | -26.0717567534 | -25.1354231043 | -7.296148372  |
| C | 2.0411032727  | -1.5426778955  | -0.2184205181 | H | -26.9037484662 | -24.4636819801 | -7.0759288452 |
| C | 3.7059124449  | -3.8343037314  | -0.3465892941 | H | -25.1805550691 | -24.5452517798 | -7.5424448318 |
| C | 2.6219143463  | -1.9374555131  | -1.426757741  | H | -26.3318723223 | -25.771574446  | -8.1513048664 |
| C | 3.4305095136  | -3.0617236708  | -1.4677372484 | S | -25.1056978043 | -34.8574346916 | -7.9126238115 |
| H | 4.3410612244  | -4.7099861094  | -0.3985345966 | C | -28.7602703401 | -33.8112989387 | -7.8490589911 |
| H | 2.4563247789  | -1.383671609   | -2.3448956449 | C | -28.2631651782 | -31.4296664811 | -7.3368797531 |
| N | 0.9553116341  | -0.6919163719  | 1.9956343196  | C | -29.1331189346 | -32.5047639484 | -7.5958088436 |
| N | 0.73634122    | 0.6338171302   | -1.8528962644 | C | -27.3304469159 | -33.9919991016 | -7.8259577054 |
| F | 3.9757333399  | -3.4302672566  | -2.6340539405 | C | -26.4129896093 | -32.8953301344 | -7.563346135  |
| F | 3.4073367048  | -4.1809669086  | 1.9324857395  | C | -26.8906424572 | -31.562730358  | -7.3062559142 |
| F | 3.6579107551  | 3.7187398111   | -2.2251704013 | N | -25.1354372831 | -33.2670421196 | -7.5895729076 |
| F | 4.8772992907  | 2.7910848632   | 2.178707701   | N | -26.6993965307 | -35.1461798378 | -8.0348083765 |
| C | -7.5888359569 | -6.8236722759  | -1.0664932572 | C | -30.5349266634 | -37.0250925854 | -8.5906993678 |
| C | -6.5986095444 | -7.8427680501  | -1.057891103  | C | -31.7451373909 | -36.2987401933 | -8.4427535976 |
| C | -8.2545655046 | -9.5283193922  | -1.4147951712 | C | -33.037409072  | -38.2496143039 | -8.9324723536 |
| C | -9.2425650803 | -8.507756622   | -1.4383965802 | C | -31.8252321457 | -38.9777777374 | -9.0749253833 |
| C | -8.9340600836 | -7.164752224   | -1.2770735036 | C | -30.5782742131 | -38.3939209511 | -8.9003273935 |
| C | -7.0176430601 | -5.5313761403  | -0.858973497  | C | -29.3911215154 | -36.1973373163 | -8.3980105287 |
| H | -7.6055219384 | -4.6207956359  | -0.8451734083 | H | -28.3745996149 | -36.553337441  | -8.4891781405 |
| C | -8.8207796895 | -10.8247930587 | -1.5908869408 | C | -34.1837614433 | -39.0792302337 | -9.1706407676 |
| S | -10.832753947 | -9.171016561   | -1.6784056238 | S | -32.1301199039 | -40.6427895686 | -9.4928933875 |
| H | -8.242950055  | -11.7391136567 | -1.5819277049 | H | -35.2029906388 | -38.7130294263 | -9.1323343346 |
| S | -5.0111208378 | -7.1836654669  | -0.7891678908 | S | -31.4460393443 | -34.6275219533 | -8.0756174103 |
| C | -6.9053201498 | -9.1846287854  | -1.2332933073 | C | -32.993005503  | -36.8895351219 | -8.5995948087 |

|   |                |                |               |   |                |                |               |
|---|----------------|----------------|---------------|---|----------------|----------------|---------------|
| C | -5.6597799941  | -5.5532816321  | -0.7060452132 | C | -29.696935666  | -34.8922165798 | -8.1057363901 |
| C | -10.1805924434 | -10.8094801291 | -1.7560160278 | O | -34.143574073  | -36.1613211128 | -8.4698316281 |
| O | -5.9262025719  | -10.1341611801 | -1.1923747793 | O | -29.4382931717 | -39.1278387034 | -9.0655765319 |
| O | -9.911577579   | -6.2096616241  | -1.2887238906 | C | -34.6388141744 | -36.110916242  | -7.1386328901 |
| C | -5.4473670298  | -10.5272441222 | -2.4729680245 | H | -35.5430573009 | -35.4994595806 | -7.1688934515 |
| H | -4.6733682785  | -11.2759455454 | -2.293976538  | H | -34.8871851618 | -37.1149980753 | -6.7714283504 |
| H | -6.2490780664  | -10.9670075834 | -3.0788821838 | H | -33.9103907026 | -35.6496068747 | -6.4602050938 |
| H | -5.0140575561  | -9.6746304145  | -3.010334448  | C | -28.8759325897 | -39.5996212243 | -7.8480670762 |
| C | -10.1468518656 | -5.649869501   | -2.5749184583 | H | -27.9863731554 | -40.1706275001 | -8.1215894275 |
| H | -10.9439258611 | -4.9143277416  | -2.4493981147 | H | -28.5891680974 | -38.767573001  | -7.1932210635 |
| H | -9.2473633735  | -5.1540082206  | -2.9611556043 | H | -29.5795286321 | -40.2520899545 | -7.3159972071 |
| H | -10.4686897008 | -6.4182242583  | -3.2887532275 | C | -33.8455890886 | -40.357836241  | -9.4698907902 |
| S | -9.3732737248  | -15.3152272831 | -2.125938711  | H | -34.5165994823 | -41.1763683706 | -9.6987869943 |
| C | -12.9810042352 | -14.1613262721 | -2.4543842991 | F | -14.6125827627 | -12.4710034774 | -2.4583904206 |
| C | -12.4404411381 | -11.7583542856 | -2.1138991933 | F | -18.7826678058 | -25.279708277  | -5.2196168458 |
| C | -13.3262078213 | -12.8276329784 | -2.3415074876 | F | -30.4344710922 | -32.184022705  | -7.5823536669 |
| C | -11.5652130497 | -14.381393924  | -2.2977862957 | H | -12.893741263  | -10.7734164104 | -2.0590070489 |
| C | -10.6318065504 | -13.2918992771 | -2.0652784717 | H | -17.5042425254 | -23.2742305705 | -4.6416098615 |
| C | -11.0788062129 | -11.9272447264 | -1.971789282  | H | -28.7391019007 | -30.4712355774 | -7.1539099752 |

**Table S11.** The coordinate of 7 (240 atoms).

| Atom | Coordinates (Angstroms) |               |               | Atom | Coordinates (Angstroms) |                |               |
|------|-------------------------|---------------|---------------|------|-------------------------|----------------|---------------|
|      | X                       | Y             | Z             |      | X                       | Y              | Z             |
| C    | -17.4056599642          | 0.6547311999  | -1.4352095066 | C    | 6.6052592133            | -9.8363413193  | -0.2430439265 |
| C    | -19.4099209096          | 2.0311930255  | -2.0947074091 | C    | 9.4663836879            | -12.4035266199 | -0.7263421297 |
| C    | -18.0599367476          | 1.861464455   | -1.7362469171 | O    | 5.3464582133            | -10.36620517   | -0.2787754113 |
| C    | -15.9370434416          | 0.6711005141  | -1.1566968858 | O    | 10.5169450602           | -8.2395719863  | -0.0856988685 |
| C    | -15.3658573504          | -0.4444608575 | -0.5319845194 | C    | 4.73237429              | -10.2960518981 | -1.5599810304 |
| C    | -14.0079493981          | -0.4947339702 | -0.2598869693 | H    | 3.7444817052            | -10.7482740345 | -1.4525690426 |
| C    | -13.1621092217          | 0.5659793735  | -0.6161660098 | H    | 4.6250782644            | -9.2557791268  | -1.891803439  |
| C    | -13.7310107296          | 1.6737177372  | -1.2634864402 | H    | 5.3107438918            | -10.854427783  | -2.3064645324 |
| C    | -15.0914691095          | 1.726649816   | -1.5229340816 | C    | 11.0362639446           | -7.8516386198  | -1.3519756933 |
| H    | -17.4592296695          | 2.7592028821  | -1.7031919658 | H    | 12.0343153              | -7.4503798002  | -1.1652216222 |
| H    | -16.0118273573          | -1.2747849295 | -0.266273046  | H    | 11.1074711815           | -8.7108729775  | -2.0307321775 |
| H    | -13.597381235           | -1.3630397849 | 0.2495474709  | H    | 10.4122214829           | -7.077637937   | -1.8155186059 |
| H    | -13.0909928182          | 2.4849760098  | -1.5981757071 | C    | 6.3951158526            | -6.2086499814  | 0.4175816997  |
| H    | -15.4847554884          | 2.5850488884  | -2.0583598628 | C    | 4.0089807544            | -3.1432115135  | 0.9529121821  |
| C    | -19.9227089257          | 3.415096425   | -2.3355608634 | C    | 5.3058189828            | -2.7334489812  | 1.2125776326  |
| C    | -19.3260101145          | 4.5536391554  | -1.780689432  | C    | 6.2620889053            | -3.7519771514  | 1.0529470295  |
| C    | -21.064903552           | 3.5735344449  | -3.130076644  | C    | 5.7185641224            | -4.9610067822  | 0.6700539561  |
| C    | -19.8478149759          | 5.8184776218  | -2.0295642941 | S    | 4.0003771603            | -4.8307030774  | 0.4976979173  |
| H    | -18.4680042025          | 4.4539651652  | -1.122554402  | H    | 5.5411779856            | -1.7213286601  | 1.511334585   |
| C    | -21.5793584669          | 4.8382142808  | -3.3878140723 | H    | 7.3235812246            | -3.6082727962  | 1.2265899253  |
| H    | -21.5410810357          | 2.6861469682  | -3.5347227565 | S    | 12.5964619402           | -19.9100391264 | -2.1659360925 |

|    |                |               |               |   |               |                |               |
|----|----------------|---------------|---------------|---|---------------|----------------|---------------|
| C  | -20.9707737912 | 5.96583377    | -2.840309603  | C | 15.632434453  | -17.6266068217 | -2.0502802015 |
| H  | -19.3795081252 | 6.6914431732  | -1.5828762906 | C | 14.3094338632 | -15.5770096341 | -1.5710000966 |
| H  | -22.460931584  | 4.9448119024  | -4.0142851378 | C | 15.5084345042 | -16.2718649963 | -1.8005980259 |
| H  | -21.3750565162 | 6.9551858101  | -3.0372312747 | H | 14.4081484668 | -14.5113842055 | -1.3878172646 |
| O  | -17.9456555902 | -0.4932473079 | -1.3372572617 | C | 14.3623417478 | -18.3064197607 | -2.0509458964 |
| O  | -20.264101865  | 1.1089995981  | -2.2869482246 | C | 13.1091737098 | -17.6086148144 | -1.8158192047 |
| Ir | -19.977007565  | -0.9917558876 | -1.8693466383 | C | 13.0723672937 | -16.1913550984 | -1.5697883406 |
| C  | -21.8894079323 | -1.3626083537 | -2.2483505459 | N | 12.0496153646 | -18.4132040425 | -1.8584804753 |
| C  | -22.4423932342 | -1.7854662146 | -3.4600041381 | N | 14.1900614512 | -19.6105270565 | -2.2597532021 |
| C  | -22.7592903342 | -1.122698506  | -1.1471086076 | C | 11.8416602957 | -15.4632939686 | -1.3441168334 |
| C  | -23.8136344922 | -1.9472469975 | -3.5720374323 | C | 10.5485311199 | -15.9373709199 | -1.2352923743 |
| H  | -21.822712356  | -1.9917073307 | -4.3261368039 | C | 9.596638319   | -14.9251283143 | -1.0078881765 |
| C  | -24.1350283343 | -1.3028521147 | -1.3222819043 | C | 10.1404841474 | -13.6588130965 | -0.9396390293 |
| C  | -24.6894559224 | -1.7114042273 | -2.5197776397 | S | 11.859321711  | -13.7275657377 | -1.1692017398 |
| H  | -25.7590106393 | -1.844115545  | -2.6264630188 | H | 10.311496095  | -16.9896678982 | -1.3175133087 |
| C  | -22.1074405461 | -0.7143807831 | 0.0884609933  | H | 8.5354713654  | -15.1170290319 | -0.887518551  |
| C  | -22.7165323165 | -0.4375101992 | 1.3190557168  | C | 25.4925475559 | -19.2604299616 | -3.3558409834 |
| C  | -21.9398144533 | -0.0852966367 | 2.4110418774  | C | 25.3456215383 | -17.9228725111 | -2.8993431516 |
| H  | -23.7917484803 | -0.5044551587 | 1.4044032088  | C | 22.9757575731 | -18.1820507729 | -2.7280314411 |
| C  | -20.0029094645 | -0.2903931581 | 1.0388998698  | C | 23.1240114908 | -19.5232252025 | -3.1742687492 |
| C  | -20.5551254186 | -0.0111436544 | 2.2766676077  | C | 24.3581140174 | -20.0780219848 | -3.4794182423 |
| H  | -22.4139776514 | 0.1279935381  | 3.3648910579  | C | 26.8539887134 | -19.5785219226 | -3.6349476174 |
| H  | -18.9347804524 | -0.2591034191 | 0.8542325663  | H | 27.1693908872 | -20.5461994218 | -4.0100400463 |
| H  | -19.9121717678 | 0.2568958912  | 3.1078392106  | C | 21.6086954737 | -17.8486728347 | -2.4962009156 |
| C  | -18.8080888269 | -2.7194437857 | -3.8921764647 | S | 21.5843430928 | -20.3263850542 | -3.2995034437 |
| C  | -19.2015108833 | -0.5601554238 | -4.7260669786 | H | 21.2867956155 | -16.8669528602 | -2.166175688  |
| C  | -18.2617840462 | -3.0944483202 | -5.1263026178 | S | 26.8791079176 | -17.1007060707 | -2.8306840463 |
| C  | -18.6748856425 | -0.8813867885 | -5.964765058  | C | 24.1137808137 | -17.3745891262 | -2.5735612571 |
| H  | -19.5989518553 | 0.4223997485  | -4.4962528289 | C | 27.7152627434 | -18.5407067373 | -3.3998173788 |
| C  | -18.1946864863 | -2.1744991888 | -6.1603459892 | O | 24.0119633324 | -16.0781592319 | -2.154265568  |
| H  | -17.8995370555 | -4.103806505  | -5.2597402005 | O | 24.4607649464 | -21.3664018959 | -3.9227785487 |
| H  | -18.6442043559 | -0.1339388425 | -6.7499156844 | C | 24.0190373707 | -15.9326487328 | -0.7393622958 |
| H  | -17.7713674451 | -2.4671749389 | -7.1170271689 | H | 23.9374818249 | -14.8623493385 | -0.5398803505 |
| C  | -18.985157665  | -3.5557499957 | -2.7137837334 | H | 23.1698764033 | -16.4563042625 | -0.2827106691 |
| C  | -18.6202058973 | -4.9015103591 | -2.6080406467 | H | 24.9522500169 | -16.314898141  | -0.3073574908 |
| C  | -19.5987045677 | -2.9200317605 | -1.5971775818 | C | 24.6917911592 | -22.3109319838 | -2.8846603872 |
| C  | -18.8380786676 | -5.6480198564 | -1.4662807053 | H | 24.7411502646 | -23.2901212633 | -3.365042073  |
| C  | -19.8320217221 | -3.6720335    | -0.4425993021 | H | 25.6383198612 | -22.1077790991 | -2.368023856  |
| C  | -19.4505668468 | -5.0032181287 | -0.3990618506 | H | 23.8739960829 | -22.3034741712 | -2.153497783  |
| H  | -18.5467690759 | -6.6897644188 | -1.4127736264 | C | 20.7456919242 | -18.8817893581 | -2.7456436853 |
| H  | -20.3069981588 | -3.238753261  | 0.4313653243  | C | 16.8937519155 | -18.2984507969 | -2.2888746121 |
| N  | -19.262831636  | -1.4462801301 | -3.7230503936 | C | 17.1014378327 | -19.6396413689 | -2.5627444447 |
| N  | -20.7519355163 | -0.627191694  | -0.0197539009 | C | 18.4539610571 | -19.9741546419 | -2.7501081599 |
| F  | -19.6758211689 | -5.709647582  | 0.7161545262  | C | 19.3096415661 | -18.8991978825 | -2.6225843142 |

|   |                |               |               |   |               |                |                |
|---|----------------|---------------|---------------|---|---------------|----------------|----------------|
| F | -18.029375219  | -5.5289492387 | -3.6427280878 | S | 18.4235379495 | -17.4525218076 | -2.2731322984  |
| F | -24.9853640421 | -1.0777961747 | -0.302504155  | H | 16.2873386353 | -20.3487060437 | -2.6207736949  |
| F | -24.3296518471 | -2.3478895869 | -4.7410054657 | H | 18.7958858148 | -20.9811568619 | -2.9660008158  |
| C | -9.5262002837  | 1.2013361644  | 0.069533426   | S | 35.9024993108 | -17.6437913306 | -4.0753547279  |
| C | -9.37378304    | -0.2112178564 | 0.0725972911  | C | 35.2100347635 | -21.110907684  | -5.4699064078  |
| C | -7.0207622182  | -0.0108013189 | 0.4416358466  | C | 32.7562191284 | -20.9792681401 | -5.0927768114  |
| C | -7.1760881614  | 1.4017497509  | 0.4554921421  | C | 33.9271668806 | -21.6250881755 | -5.5224469899  |
| C | -8.4064596132  | 2.0194591375  | 0.2853420569  | H | 31.8353313384 | -21.5416537228 | -5.2135969823  |
| C | -10.8802647516 | 1.5865539626  | -0.1717411417 | C | 35.2500588984 | -19.7852040874 | -4.9073355393  |
| H | -11.2024726651 | 2.6209763518  | -0.2057132557 | C | 34.0515511811 | -19.097022232  | -4.4561936635  |
| C | -5.6589301495  | -0.3962890245 | 0.6193074213  | C | 32.7528990854 | -19.709553057  | -4.5492253792  |
| S | -5.6483937982  | 2.2083662801  | 0.6777292805  | N | 34.3006852724 | -17.8836535984 | -3.9688781382  |
| H | -5.3343091083  | -1.4311800784 | 0.6289604312  | N | 36.3521230443 | -19.0564202641 | -4.7391682622  |
| S | -10.8897180356 | -1.0122306248 | -0.223915062  | C | 31.5386366472 | -19.0532227895 | -4.1122713717  |
| C | -8.1456317286  | -0.8299544604 | 0.2637998844  | C | 31.368839038  | -17.8007727647 | -3.554321809   |
| C | -11.7273348819 | 0.5282605712  | -0.3414438452 | C | 30.0271497933 | -17.4973612586 | -3.253143671   |
| O | -8.0287606232  | -2.1908026915 | 0.2376618291  | C | 29.1451532231 | -18.5089221722 | -3.5732742272  |
| O | -8.5142482212  | 3.3821683863  | 0.2847370198  | S | 29.9962622622 | -19.8545930226 | -4.2637887787  |
| C | -8.1581550222  | -2.8010634454 | 1.5158605103  | H | 32.2004685587 | -17.1332269595 | -3.3726003724  |
| H | -8.0525988497  | -3.8758421217 | 1.3556835648  | H | 29.7109131417 | -16.5606983928 | -2.805869049   |
| H | -7.3746821778  | -2.4533991412 | 2.201046088   | C | 41.163695988  | -28.2902774736 | -9.2952446202  |
| H | -9.1407909566  | -2.5927542504 | 1.956876319   | C | 39.880257493  | -28.8669405738 | -9.1031041188  |
| C | -8.822975971   | 3.9301313493  | 1.5600491604  | C | 39.025950472  | -26.8116735086 | -8.2297961912  |
| H | -8.8746537997  | 5.0125168607  | 1.4259434997  | C | 40.3096057892 | -26.2346695037 | -8.4248197154  |
| H | -9.7882505222  | 3.5594141972  | 1.9274090242  | C | 41.3747526296 | -26.9452051443 | -8.9597599679  |
| H | -8.0431644049  | 3.6904172893  | 2.2935991301  | C | 42.0970155854 | -29.240423418  | -9.8292782185  |
| S | 3.3455241476   | 1.2823118446  | 1.9854348855  | H | 43.1366812287 | -29.0084371325 | -10.0288280693 |
| C | 2.7975265721   | -2.3507140639 | 1.0134113802  | C | 38.1086769162 | -25.8827433814 | -7.6515074783  |
| C | 0.3343821046   | -2.1130019338 | 0.7755501912  | S | 40.3459307689 | -24.573132531  | -7.9035259429  |
| C | 1.5338844139   | -2.8428187735 | 0.7417043134  | H | 37.0893922314 | -26.1443574076 | -7.3887261626  |
| H | -0.5639727346  | -2.6699385628 | 0.5272899645  | S | 39.8612387857 | -30.5433690215 | -9.5792846061  |
| C | 2.7824237241   | -0.9526388864 | 1.3604636474  | C | 38.8076862215 | -28.1494544024 | -8.5873756408  |
| C | 1.5535414829   | -0.1771017762 | 1.4014319297  | O | 37.5908845168 | -28.7425998842 | -8.4004861791  |
| C | 0.2789534221   | -0.7708368914 | 1.0963369945  | O | 42.6001929273 | -26.3596173005 | -9.1204582441  |
| N | 1.7519631163   | 1.0943175973  | 1.7419304006  | C | 36.6986391465 | -28.5738575611 | -9.4946860498  |
| N | 3.8553633051   | -0.2279738728 | 1.6729984713  | H | 35.7772640013 | -29.0931901489 | -9.2235050368  |
| C | -4.8079010159  | 0.6649809013  | 0.7662383804  | H | 36.4828073115 | -27.5123721525 | -9.670225899   |
| C | -0.963310233   | -0.0271242247 | 1.1145483575  | H | 37.1096730925 | -29.0142407328 | -10.4116456981 |
| C | -1.1864270078  | 1.3062174471  | 1.3993784903  | C | 42.7897523747 | -25.7811503472 | -10.4049381794 |
| C | -2.5411512888  | 1.6811133096  | 1.3066057086  | H | 43.7914247649 | -25.3463653548 | -10.4026995663 |
| C | -3.3785974443  | 0.6439915287  | 0.9518625839  | H | 42.7211871441 | -26.5398490293 | -11.1949169872 |
| S | -2.4687713257  | -0.8146245026 | 0.7192740416  | H | 42.0508349304 | -24.9934481571 | -10.5981063605 |
| H | -0.3842280945  | 1.9802377325  | 1.668647682   | C | 38.6549678543 | -24.6501581599 | -7.4209200751  |
| H | -2.9008256776  | 2.6851078273  | 1.506553137   | C | 36.3894300942 | -21.8173810404 | -5.9270445746  |

|   |               |                |               |   |               |                |                |
|---|---------------|----------------|---------------|---|---------------|----------------|----------------|
| C | 9.047961026   | -10.134157924  | -0.3580349145 | C | 37.7017568822 | -21.3765678406 | -5.9132510671  |
| C | 7.7220845006  | -10.6431406676 | -0.4031958181 | C | 38.6165849665 | -22.3107246794 | -6.4310219082  |
| C | 6.813806706   | -8.4682386619  | -0.0074948512 | C | 38.0257075517 | -23.4849476689 | -6.8494611595  |
| C | 8.1397291599  | -7.9584084506  | 0.034844089   | S | 36.3120487772 | -23.425674771  | -6.6085110785  |
| C | 9.2558996481  | -8.761961432   | -0.1462371248 | H | 37.9787814697 | -20.4036126697 | -5.5316651447  |
| C | 10.0171137099 | -11.1640071018 | -0.54048203   | H | 39.6860817312 | -22.1350023163 | -6.4837274094  |
| H | 11.0859430409 | -10.9824176582 | -0.5054161028 | C | 41.5387335295 | -30.4598898251 | -10.0294058643 |
| C | 5.8452320439  | -7.4466379723  | 0.2197855196  | H | 42.0245342165 | -31.3487383339 | -10.4120945142 |
| S | 8.15272925    | -6.244288276   | 0.3411703553  | F | 33.7407413423 | -22.8552012532 | -6.0253497473  |
| H | 4.7792201136  | -7.6412989278  | 0.2650742529  | F | 16.6154471823 | -15.5143683134 | -1.7656849569  |
| S | 7.7079964016  | -12.363026291  | -0.6743687092 | F | 1.3984094949  | -4.1347478107  | 0.4054226959   |

**Table S12.** The coordinate of **8** (240 atoms).

| Atom | Coordinates (Angstroms) |               |               | Atom | Coordinates (Angstroms) |               |               |
|------|-------------------------|---------------|---------------|------|-------------------------|---------------|---------------|
|      | X                       | Y             | Z             |      | X                       | Y             | Z             |
| C    | -27.603300636           | 0.1600360991  | 0.8470917645  | O    | 2.2354318861            | 1.6754095904  | -1.0890258525 |
| C    | -30.0344162139          | 0.7610679751  | 0.5671690261  | C    | -1.1924921717           | -0.0693605213 | -6.0994319628 |
| C    | -28.6551843158          | 0.9660922395  | 0.3787531256  | H    | -1.8482395972           | -0.6647498922 | -6.7375678174 |
| C    | -26.196870093           | 0.5431459537  | 0.5172597547  | H    | -1.6421552606           | 0.9170045867  | -5.9290852053 |
| C    | -25.1626544835          | 0.0179989932  | 1.3014012721  | H    | -0.2207433785           | 0.0574848396  | -6.5922319216 |
| C    | -23.8406855821          | 0.358398602   | 1.0620592435  | C    | 2.7714285               | 2.9272402697  | -1.5017584285 |
| C    | -23.4980065949          | 1.2258221289  | 0.0143389453  | H    | 3.3757646087            | 3.2920623791  | -0.6690460025 |
| C    | -24.5318560529          | 1.7186617174  | -0.7972812318 | H    | 3.4033081696            | 2.8112551784  | -2.3913437206 |
| C    | -25.8543406034          | 1.3894783014  | -0.5456093995 | H    | 1.9737627218            | 3.6487328366  | -1.7169279817 |
| H    | -28.3747041775          | 1.8409481409  | -0.1901860181 | C    | -2.3134272335           | 2.0332614428  | -1.83652586   |
| H    | -25.41891432            | -0.6606305843 | 2.1084492221  | C    | -5.9533415825           | 3.3912973077  | -1.1857663654 |
| H    | -23.0627699063          | -0.0378126193 | 1.7100099563  | C    | -5.1125766197           | 3.9341812282  | -0.2467919311 |
| H    | -24.2902972604          | 2.3450963032  | -1.6510586341 | C    | -3.7691418869           | 3.5207200228  | -0.3824012646 |
| H    | -26.6216549543          | 1.7683438063  | -1.2136565511 | C    | -3.5474478797           | 2.6480698319  | -1.4184600953 |
| C    | -30.9974615603          | 1.765116091   | 0.0179302855  | S    | -5.0481654966           | 2.3376093287  | -2.2369829748 |
| C    | -30.6403269869          | 3.0887686056  | -0.2665294839 | S    | 9.5121151487            | -6.4824524355 | -4.8414613396 |
| C    | -32.3226988586          | 1.3657942678  | -0.1959288455 | C    | 11.4116576487           | -3.2991625843 | -4.0875292239 |
| C    | -31.5795959859          | 3.9830391851  | -0.768549498  | C    | 9.4218314785            | -1.8477075652 | -4.1950504044 |
| H    | -29.6321122825          | 3.4382026159  | -0.0655474863 | C    | 10.8125384975           | -2.0641103827 | -4.008518176  |
| C    | -33.2583973337          | 2.2565136951  | -0.707246057  | C    | 10.5174330898           | -4.3787997977 | -4.392349989  |
| H    | -32.6022611242          | 0.3471130008  | 0.0529596596  | C    | 9.0983630229            | -4.1604245092 | -4.5674521076 |
| C    | -32.8892575705          | 3.5682221897  | -0.9981376786 | C    | 8.5235191801            | -2.848751914  | -4.4806584239 |
| H    | -31.2888598249          | 5.0096799068  | -0.9744321028 | N    | 8.4209044852            | -5.2790661053 | -4.8105537814 |
| H    | -34.2805182174          | 1.9279796582  | -0.875496235  | N    | 10.8752450687           | -5.651386855  | -4.5398269042 |
| H    | -33.6212072719          | 4.2672800343  | -1.3939162204 | C    | 7.1042228753            | -2.6073906833 | -4.6729160807 |
| O    | -27.7080465861          | -0.8708872189 | 1.5854097946  | C    | 6.2636026695            | -3.1750929255 | -5.597474183  |
| O    | -30.5788688533          | -0.2346935121 | 1.1408446866  | C    | 4.9227483044            | -2.7463756794 | -5.4828938043 |
| Ir   | -29.5500852455          | -1.8042361396 | 2.2075367294  | C    | 4.7027854081            | -1.8389114883 | -4.4768201553 |
| C    | -31.2757546698          | -2.5309990755 | 2.8630490056  | S    | 6.2016177764            | -1.513478248  | -3.6612157311 |

|   |                |               |               |   |               |               |               |
|---|----------------|---------------|---------------|---|---------------|---------------|---------------|
| C | -32.0290101982 | -3.5603617747 | 2.2916632267  | C | 21.3865830646 | -1.954544244  | -4.642410156  |
| C | -31.7815634124 | -1.8759197728 | 4.0215122914  | C | 20.7636280091 | -0.9023624749 | -5.3661744235 |
| C | -33.2485356308 | -3.910999555  | 2.847452278   | C | 18.5964415752 | -1.7621786181 | -4.8441525381 |
| H | -31.6837108473 | -4.0971678626 | 1.4141293646  | C | 19.2191307206 | -2.8143879987 | -4.1203168207 |
| C | -33.0200986881 | -2.2737250028 | 4.5348897913  | C | 20.5975063096 | -2.9205250853 | -3.9987886896 |
| C | -33.7743215391 | -3.2837673316 | 3.9700802746  | C | 22.8078024557 | -1.8617248513 | -4.6948399775 |
| H | -34.7299561135 | -3.5723424391 | 4.3900902369  | H | 23.4635306022 | -2.5878064948 | -4.2262600198 |
| C | -30.92640361   | -0.8380264241 | 4.5784146846  | C | 17.176288454  | -1.878280668  | -4.8271192752 |
| C | -31.1696050941 | -0.057781444  | 5.7162928323  | S | 18.0485013186 | -3.9122324645 | -3.4462240455 |
| C | -30.2303502656 | 0.8730480836  | 6.1296988942  | H | 16.522393748  | -1.1834196209 | -5.3431761273 |
| H | -32.0912337806 | -0.1939952793 | 6.2638676394  | S | 21.9349442415 | 0.1613191739  | -6.0914472122 |
| C | -28.8565863449 | 0.2317533149  | 4.2915034305  | C | 19.3848531172 | -0.7831321029 | -5.4681885386 |
| C | -29.0468454876 | 1.0235771871  | 5.4102057808  | C | 23.2545559241 | -0.7888754981 | -5.4183825839 |
| H | -30.4201551869 | 1.4765618236  | 7.0128081851  | O | 18.8121618184 | 0.2305736967  | -6.1822530783 |
| H | -27.9599544616 | 0.2878811379  | 3.6840394587  | O | 21.1702376971 | -3.9503521898 | -3.3084697612 |
| H | -28.2845850837 | 1.7369512517  | 5.7037632113  | C | 18.5466078817 | 1.3960578898  | -5.4103941237 |
| C | -28.6305125733 | -4.1578754178 | 0.7726620715  | H | 18.1051809906 | 2.1234683039  | -6.0943236546 |
| C | -29.8985135472 | -2.7465792165 | -0.6103350705 | H | 17.8405771349 | 1.17934446    | -4.5987992767 |
| C | -28.4232021122 | -5.0262182631 | -0.3068798845 | H | 19.4696132195 | 1.8086379362  | -4.9849644532 |
| C | -29.7263716978 | -3.5728124833 | -1.7069071818 | C | 21.3857215253 | -3.6673133626 | -1.9307664484 |
| H | -30.4770366769 | -1.8303842195 | -0.6540584524 | H | 21.8322223321 | -4.5650310931 | -1.4989798314 |
| C | -28.9702155418 | -4.7317547637 | -1.5454402868 | H | 22.0704907409 | -2.8192001341 | -1.8047260579 |
| H | -27.8379718481 | -5.9227820422 | -0.1601759793 | H | 20.4408738493 | -3.447240736  | -1.4189204415 |
| H | -30.1749092423 | -3.3092128174 | -2.6584536656 | C | 16.7293492969 | -2.9626460676 | -4.1211822359 |
| H | -28.8090919047 | -5.4066149979 | -2.3813333332 | C | 12.8351349625 | -3.5034583213 | -3.8834588776 |
| C | -28.1595495029 | -4.3208729297 | 2.1404420564  | C | 13.4569840618 | -4.5248555326 | -3.2099524485 |
| C | -27.3950770875 | -5.3907887731 | 2.6161971029  | C | 14.8667855008 | -4.4425007855 | -3.2316648427 |
| C | -28.5399856866 | -3.2909281979 | 3.0470312363  | C | 15.3596374655 | -3.3581913133 | -3.9138710297 |
| C | -26.9970823217 | -5.4978550655 | 3.9346889003  | S | 14.034906522  | -2.4219102839 | -4.5356208621 |
| C | -28.1490808256 | -3.3977193413 | 4.3844986378  | S | 30.4037621779 | 2.8896739673  | -4.9996191379 |
| C | -27.3936460963 | -4.4833948928 | 4.7968814509  | C | 31.4519839812 | -0.7437843953 | -4.8899607942 |
| H | -26.4063593069 | -6.3389985977 | 4.2759903866  | C | 29.1865475577 | -1.6189162083 | -5.3165374578 |
| H | -28.4221003247 | -2.6465029592 | 5.1181501182  | C | 30.5752481846 | -1.787312489  | -5.0723197017 |
| N | -29.3663885397 | -3.0262229513 | 0.5870470292  | C | 30.8569467239 | 0.5588478116  | -4.9788172577 |
| N | -29.7657653503 | -0.6650669477 | 3.8856063875  | C | 29.4395765331 | 0.730021161   | -5.2108380184 |
| F | -27.0226998701 | -4.5692229795 | 6.0808441108  | C | 28.56843748   | -0.3936672557 | -5.4027002505 |
| F | -27.0124602536 | -6.3765562653 | 1.7825432221  | N | 29.0600789485 | 2.0048216668  | -5.2268640284 |
| F | -33.5303865916 | -1.6693940508 | 5.6248429412  | N | 31.5124196874 | 1.7102152917  | -4.8599763275 |
| F | -33.9619613049 | -4.895555547  | 2.2862213696  | C | 27.1473697739 | -0.2376594835 | -5.6592253524 |
| C | -20.2402045976 | 2.8396620959  | -0.9191679845 | C | 26.5267064587 | 0.6926671095  | -6.4549378177 |
| C | -19.6126885047 | 1.713863129   | -0.3202911071 | C | 25.1176768851 | 0.5988960494  | -6.4434265417 |
| C | -17.4477817162 | 2.5807827535  | -0.842027738  | C | 24.6242134806 | -0.4078660303 | -5.6516869431 |
| C | -18.0745765997 | 3.7094390507  | -1.4342805801 | S | 25.9471257692 | -1.249994279  | -4.9043885325 |
| C | -19.4538113701 | 3.8608911551  | -1.472355367  | C | 40.8587476334 | -4.3092292039 | -5.6020865898 |



|   |                |               |               |   |                |               |               |
|---|----------------|---------------|---------------|---|----------------|---------------|---------------|
| C | -21.6639227262 | 2.7496891622  | -0.8525786405 | C | 40.0252379805  | -5.1180463543 | -6.420734239  |
| H | -22.3209613018 | 3.5184203801  | -1.2425198865 | C | 38.1022528246  | -3.8303243624 | -5.8241671263 |
| C | -16.027336779  | 2.6564892657  | -0.9355304108 | C | 38.9354541533  | -3.0212945278 | -5.0068348033 |
| S | -16.9087789252 | 4.8229565957  | -2.0903535803 | C | 40.3024731579  | -3.235800886  | -4.8930857974 |
| H | -15.3701324617 | 1.8784798181  | -0.5618663762 | C | 42.2217854326  | -4.7571419967 | -5.6270939928 |
| S | -20.7890118069 | 0.58429158    | 0.2879454431  | H | 43.0138684709  | -4.2903144015 | -5.0534248958 |
| C | -18.2330560618 | 1.5708125321  | -0.2650567231 | C | 36.7390418117  | -3.4148714504 | -5.7629894799 |
| C | -22.1123004269 | 1.617809299   | -0.2331355021 | S | 38.0267924245  | -1.7839148089 | -4.1862963058 |
| O | -17.6537077343 | 0.4700377967  | 0.2995049662  | H | 35.9435940107  | -3.9237769472 | -6.2970308775 |
| O | -20.0277057564 | 4.9521786304  | -2.061984743  | S | 40.9352271933  | -6.3928044841 | -7.1857742346 |
| C | -17.4063558814 | 0.6041648632  | 1.6937641521  | C | 38.6610653869  | -4.8901573328 | -6.5528368509 |
| H | -16.9541741807 | -0.3352979771 | 2.0175842095  | O | 37.8797077011  | -5.692652082  | -7.3350986723 |
| H | -16.7150715954 | 1.4326399836  | 1.8938367326  | O | 41.0728599211  | -2.4476657295 | -4.0845338477 |
| H | -18.3382098975 | 0.7703994706  | 2.2481670185  | C | 37.7788870232  | -5.2545991011 | -8.6844397292 |
| C | -20.2500272554 | 6.034654307   | -1.1665911975 | H | 37.1427749954  | -5.9793616958 | -9.1963780007 |
| H | -20.6981535306 | 6.8357656093  | -1.7577294265 | H | 37.321436855   | -4.2587953364 | -8.743249684  |
| H | -20.9357461913 | 5.745723576   | -0.3600506841 | H | 38.7633169096  | -5.2278336324 | -9.1676731611 |
| H | -19.3080173616 | 6.387944923   | -0.7292560327 | C | 41.6336159821  | -1.323237932  | -4.7501276678 |
| S | -8.3611219407  | 7.2551850531  | -0.8923063611 | H | 42.2085088511  | -0.7765563579 | -3.9999909028 |
| C | -7.3746280947  | 3.6335504011  | -1.3621588098 | H | 42.2983432296  | -1.6371280956 | -5.5649748924 |
| C | -9.6677411302  | 2.8596049535  | -1.8324289724 | H | 40.8500136988  | -0.6710353231 | -5.1553408692 |
| C | -8.2743671585  | 2.6396206221  | -1.6670932866 | C | 36.5374412375  | -2.3379725103 | -4.9432970409 |
| C | -7.9488767138  | 4.9419856085  | -1.2345413215 | C | 32.8687030932  | -0.9340055598 | -4.6339358366 |
| C | -9.3697838408  | 5.1634878989  | -1.3878172266 | C | 33.6752262725  | -0.2383383278 | -3.768322901  |
| C | -10.2664695248 | 4.0914737935  | -1.7120118192 | C | 35.025846507   | -0.6499077164 | -3.7962320811 |
| N | -9.7270321329  | 6.4311134281  | -1.2011211205 | C | 35.2874965858  | -1.6739712604 | -4.671667405  |
| N | -7.2692968531  | 6.0541855653  | -0.9686570341 | S | 33.8170959805  | -2.1279400472 | -5.4775148976 |
| C | -15.585007783  | 3.7898549471  | -1.5627512091 | C | 42.3973732218  | -5.8395797592 | -6.4243931123 |
| C | -11.6926283302 | 4.3021875307  | -1.8879689067 | H | 43.3200970306  | -6.3752425433 | -6.6092928945 |
| C | -12.3224867101 | 5.3434324471  | -2.5221116756 | F | 31.000705004   | -3.048459082  | -5.0288952608 |
| C | -13.7318071569 | 5.2707245194  | -2.469018716  | F | 11.5319032513  | -0.9743533819 | -3.7453783251 |
| C | -14.2169872999 | 4.1727744872  | -1.803310459  | F | -7.868776285   | 1.3816392883  | -1.8282259012 |
| S | -12.8850438323 | 3.2131839452  | -1.2342753783 | F | -10.3897087722 | 1.7775438161  | -2.1168495649 |
| C | 1.9597118418   | 0.1660654801  | -2.9460307056 | F | 9.0169195885   | -0.5845953506 | -4.0726314655 |
| C | 1.1025369153   | -0.446809932  | -3.8992329918 | F | 28.4889764376  | -2.7441719046 | -5.4603113258 |
| C | -0.786838541   | 0.7248705973  | -3.0234532497 | F | 35.9390537914  | -0.0825193117 | -3.0126115273 |
| C | 0.0708125131   | 1.3388601262  | -2.0713658945 | F | 33.2684520699  | 0.702408207   | -2.9311773494 |
| C | 1.4343005134   | 1.0843592771  | -2.0240191733 | F | 27.1433962022  | 1.5821674262  | -7.2160774166 |
| C | 3.3052474992   | -0.2829727362 | -3.0807122887 | F | 24.361673173   | 1.4221752729  | -7.1647470952 |
| H | 4.1057571684   | 0.0530790624  | -2.4303690389 | F | 15.6242757397  | -5.3468914691 | -2.6169411917 |
| C | -2.1402941529  | 1.1402462408  | -2.8595996181 | F | 12.8411425494  | -5.4898656781 | -2.5465594045 |
| S | -0.8059546407  | 2.399347198   | -1.0054447949 | F | 6.6316094704   | -4.0107627291 | -6.5549634705 |
| H | -2.9505667132  | 0.7642600351  | -3.4751294005 | F | 3.9793808439   | -3.1909809809 | -6.3086920078 |
| S | 1.96911096     | -1.5528605922 | -4.9266193731 | F | -2.824399665   | 3.9482899079  | 0.4509112302  |

|   |               |               |               |   |                |              |               |
|---|---------------|---------------|---------------|---|----------------|--------------|---------------|
| C | -0.2567020946 | -0.1744015212 | -3.9617891887 | F | -5.4823375594  | 4.7356953491 | 0.7390130889  |
| C | 3.4748163838  | -1.192503977  | -4.0897157649 | F | -11.7147401839 | 6.3211084694 | -3.1748146147 |
| O | -1.0599985649 | -0.7892966684 | -4.8792307526 | F | -14.4960120435 | 6.1984101313 | -3.0395439853 |

**Table S13.** The coordinate of **9** (198 atoms).

| Atom | Coordinates (Angstroms) |               |               | Atom | Coordinates (Angstroms) |                |               |
|------|-------------------------|---------------|---------------|------|-------------------------|----------------|---------------|
|      | X                       | Y             | Z             |      | X                       | Y              | Z             |
| C    | -2.0937181965           | -0.984231003  | -0.0706577069 | N    | -9.3677991784           | -13.3623641881 | -2.9936454552 |
| C    | -1.8457964757           | 1.4605798369  | 0.4875493007  | N    | -10.8996493456          | -15.2785970474 | -3.3720485608 |
| C    | -2.5891156626           | 0.3095492231  | 0.1662365344  | C    | -14.7005710436          | -17.247578158  | -3.8103607306 |
| C    | -3.0584424592           | -2.0888391461 | -0.3556189068 | C    | -15.9209769946          | -16.5614856259 | -3.5707878521 |
| C    | -2.5825358975           | -3.2433476708 | -0.9884465316 | C    | -17.1763360536          | -18.5467625393 | -4.0105902169 |
| C    | -3.4289796045           | -4.3030974353 | -1.2718330312 | C    | -15.9554444157          | -19.2336542848 | -4.2451809718 |
| C    | -4.7846612984           | -4.2598726543 | -0.9133452693 | C    | -14.7194341952          | -18.6121340085 | -4.1425840745 |
| C    | -5.2542297191           | -3.1133757697 | -0.2531242117 | C    | -13.5733862098          | -16.3896208101 | -3.6725672801 |
| C    | -4.4096864201           | -2.0470220437 | 0.0125559737  | H    | -12.5544648193          | -16.7141178878 | -3.8296878718 |
| H    | -3.6599225404           | 0.4367062198  | 0.0901610078  | C    | -18.3050615604          | -19.3953005367 | -4.1899316829 |
| H    | -1.5312823718           | -3.2928753792 | -1.2525700778 | S    | -16.2259505017          | -20.8925665588 | -4.6813539377 |
| H    | -3.036002221            | -5.1740101537 | -1.7905189457 | H    | -19.3266695963          | -19.0605762861 | -4.0774021513 |
| H    | -6.286001481            | -3.0734545443 | 0.0836694786  | S    | -15.6512840188          | -14.8878368594 | -3.1919024493 |
| H    | -4.8027197679           | -1.1924710837 | 0.5548274668  | C    | -17.1561525144          | -17.1878552649 | -3.6551965065 |
| C    | -2.5627122313           | 2.7642998847  | 0.6374102604  | C    | -13.90169503            | -15.0996431489 | -3.337335213  |
| C    | -3.8004343885           | 3.0255332031  | 0.0374095276  | C    | -17.9760843096          | -20.6809758227 | -4.541656731  |
| C    | -1.9541944976           | 3.7746732926  | 1.3923813157  | O    | -18.3114545182          | -16.4935174949 | -3.4373235095 |
| C    | -4.4212137265           | 4.2588727907  | 0.2039105815  | O    | -13.5668954898          | -19.2983496145 | -4.3970161898 |
| H    | -4.2709151546           | 2.2756276795  | -0.5914875571 | C    | -18.7915382129          | -16.5831638524 | -2.1014341653 |
| C    | -2.5798165633           | 5.0028334843  | 1.5676988456  | H    | -19.702144957           | -15.982269176  | -2.0614507961 |
| H    | -0.9814980783           | 3.5779847887  | 1.8318512326  | H    | -19.0253047146          | -17.6211589914 | -1.833702038  |
| C    | -3.8172867319           | 5.2483388078  | 0.9760407158  | H    | -18.058036589           | -16.1822398313 | -1.3909807105 |
| H    | -5.37682301             | 4.4497945857  | -0.2769854911 | C    | -12.9438678669          | -19.8291532223 | -3.233690547  |
| H    | -2.0986838642           | 5.7733453258  | 2.1642179573  | H    | -12.0506187071          | -20.354708585  | -3.5768338755 |
| H    | -4.3053265736           | 6.2102541456  | 1.1086976243  | H    | -12.6548663149          | -19.0302748734 | -2.5395075273 |
| O    | -0.8702945113           | -1.3325906257 | -0.1093129426 | H    | -13.6068973194          | -20.534770486  | -2.7179283208 |
| O    | -0.595640039            | 1.515319144   | 0.7133574056  | S    | -22.5554708932          | -20.9224298751 | -4.2428413678 |
| Ir   | 0.8104770297            | -0.1070567635 | 0.4657680891  | C    | -20.7390359395          | -24.0737346161 | -5.3438055439 |
| C    | 2.3277156166            | 1.1080458468  | 0.8630289386  | C    | -18.4946010109          | -23.0304452903 | -5.2047237536 |
| C    | 2.950108395             | 1.3083794443  | 2.0980526958  | C    | -19.3675728643          | -24.1165986557 | -5.4648986836 |
| C    | 2.7748859821            | 1.8652471149  | -0.2571820494 | C    | -21.2206458767          | -22.7835451764 | -4.9148577475 |
| C    | 3.9694866               | 2.239432359   | 2.2133930641  | C    | -20.3249535853          | -21.6695947626 | -4.6470221776 |
| H    | 2.6546157256            | 0.7500417331  | 2.9799071275  | C    | -18.8943137745          | -21.7773100258 | -4.7955409347 |
| C    | 3.8070459535            | 2.7913491711  | -0.0774027039 | N    | -20.9697955728          | -20.5729852585 | -4.2599324545 |
| C    | 4.4204819371            | 3.000734276   | 1.1424392115  | N    | -22.4991469069          | -22.4730728071 | -4.7214891554 |
| H    | 5.219261059             | 3.7238212192  | 1.252106215   | C    | -23.5453725884          | -26.5002255849 | -5.8306620932 |

|   |                |                |               |   |                |                |               |
|---|----------------|----------------|---------------|---|----------------|----------------|---------------|
| C | 2.1035158652   | 1.5789749171   | -1.5166009517 | C | -22.5614717911 | -27.4261741083 | -6.2687491793 |
| C | 2.3542155707   | 2.1594600157   | -2.7665354225 | C | -24.2273925478 | -29.105654118  | -6.6065531345 |
| C | 1.6362033932   | 1.7457537632   | -3.8770593418 | C | -25.2122448897 | -28.1773894004 | -6.1756500489 |
| H | 3.1107768667   | 2.9263671977   | -2.852451282  | C | -24.8972650105 | -26.8807847252 | -5.7960327486 |
| C | 0.4574016898   | 0.2127976432   | -2.4856926495 | C | -22.9717538247 | -25.2496098113 | -5.4663175074 |
| C | 0.6701156109   | 0.7510682103   | -3.7426748238 | H | -23.5474968051 | -24.4164474666 | -5.0886322009 |
| H | 1.8328397711   | 2.196749281    | -4.845627576  | C | -24.795323369  | -30.370257886  | -6.9293453329 |
| H | -0.2724713439  | -0.567204966   | -2.2981323692 | S | -26.8005324063 | -28.8798288004 | -6.1787534665 |
| H | 0.0911447028   | 0.396519684    | -4.5883702296 | H | -24.2125354573 | -31.2193826404 | -7.2574575384 |
| C | 1.2182227104   | -2.0127634774  | 2.6228508112  | S | -20.9669311158 | -26.7397567347 | -6.2178219278 |
| C | -0.1976665827  | -0.2586729184  | 3.2787623992  | C | -22.8787949837 | -28.7172729013 | -6.6652811439 |
| C | 1.0640943047   | -2.6055289779  | 3.8826131868  | C | -21.6084392449 | -25.2035802216 | -5.6209508501 |
| C | -0.3794198187  | -0.80080353    | 4.5388600425  | C | -26.1571632554 | -30.4198906248 | -6.7638889645 |
| H | -0.6605669287  | 0.6718620473   | 2.969613875   | O | -21.9052458313 | -29.5889415477 | -7.0611863948 |
| C | 0.2644481219   | -1.9994880174  | 4.8382647471  | O | -25.8678715765 | -26.0219557022 | -5.3666927177 |
| H | 1.5755947711   | -3.5330202887  | 4.0966462106  | C | -21.7058184909 | -29.6262113038 | -8.4689268434 |
| H | -1.0101372128  | -0.2932695813  | 5.2604396648  | H | -20.9062678724 | -30.3479854496 | -8.6467962948 |
| H | 0.1464090514   | -2.460393523   | 5.8148582342  | H | -22.6154823161 | -29.9514463264 | -8.9889649298 |
| C | 2.034353266    | -2.4896006798  | 1.5158553506  | H | -21.402120172  | -28.6435540117 | -8.8505796325 |
| C | 2.8160278775   | -3.6491547315  | 1.5217518212  | C | -26.362872962  | -25.1583709264 | -6.3826146473 |
| C | 2.0241227334   | -1.6729925544  | 0.3494851147  | H | -27.1283096311 | -24.5382566695 | -5.9120433086 |
| C | 3.5883448456   | -4.035940064   | 0.4437333625  | H | -25.5664470279 | -24.5176634374 | -6.7811860953 |
| C | 2.8111141786   | -2.0529393349  | -0.7410537135 | H | -26.8112450116 | -25.7313743508 | -7.2036764502 |
| C | 3.5663628223   | -3.2125369752  | -0.6749054784 | S | -25.2271606782 | -34.6525416664 | -8.2956036251 |
| H | 4.1856000206   | -4.9387960027  | 0.4764692973  | C | -28.8588327635 | -33.8803102206 | -7.4853206248 |
| H | 2.8485753671   | -1.459957133   | -1.64878833   | C | -28.3831261518 | -31.5480749923 | -6.7933916169 |
| N | 0.5709615958   | -0.8451518246  | 2.3514070446  | C | -29.2520939529 | -32.6452221643 | -7.0197750466 |
| N | 1.1461113728   | 0.6153709854   | -1.4093473664 | C | -27.4388559639 | -33.9579193982 | -7.726953318  |
| F | 4.311702437    | -3.5661039048  | -1.7298699533 | C | -26.5478686009 | -32.8315525995 | -7.4974443262 |
| F | 2.8418073371   | -4.446067813   | 2.6070095851  | C | -27.0224487608 | -31.5611792185 | -7.0064072946 |
| F | 4.2480389081   | 3.5274981906   | -1.1151929753 | N | -25.2804768067 | -33.1113983993 | -7.7868092147 |
| F | 4.553066256    | 2.4230347611   | 3.4046316282  | N | -26.8006040879 | -35.0351422524 | -8.1748096919 |
| C | -7.6309049787  | -6.6143087462  | -1.5869904286 | C | -30.5780860288 | -37.104692369  | -8.2968757474 |
| C | -6.6422978242  | -7.6299640842  | -1.6981038623 | C | -31.7812306746 | -36.4732954864 | -7.8871829466 |
| C | -8.3169705064  | -9.2844934535  | -2.104559603  | C | -33.045539248  | -38.4371740002 | -8.3946421162 |
| C | -9.3047684769  | -8.2702509009  | -2.0017612317 | C | -31.8393865277 | -39.0713688451 | -8.7989594215 |
| C | -8.9840804439  | -6.9407373368  | -1.7572342592 | C | -30.607451379  | -38.4339153206 | -8.7484520294 |
| C | -7.0494272999  | -5.3411885935  | -1.3037076179 | C | -29.4564684649 | -36.2331608083 | -8.1877376418 |
| H | -7.6382843281  | -4.4380003734  | -1.1933104384 | H | -28.4522359702 | -36.5148156928 | -8.4716984348 |
| C | -8.8916351195  | -10.5653705316 | -2.3392274665 | C | -34.1776003153 | -39.3045599832 | -8.5528521956 |
| S | -10.9060181228 | -8.9173197486  | -2.1887980084 | S | -32.1324062475 | -40.6975825093 | -9.354622533  |
| H | -8.3106711115  | -11.4724401372 | -2.4287496133 | H | -35.1938998682 | -39.0071950119 | -8.322274661  |
| S | -5.0442047449  | -6.9913114454  | -1.4406368369 | S | -31.5047809188 | -34.8351633931 | -7.3816038285 |
| C | -6.9587844349  | -8.9535097993  | -1.9628608843 | C | -33.0105279012 | -37.1196088117 | -7.9192709346 |

|   |                |                |               |   |                |                |               |
|---|----------------|----------------|---------------|---|----------------|----------------|---------------|
| C | -5.6871295365  | -5.3725094015  | -1.2010934821 | C | -29.77284265   | -34.9870660219 | -7.7084092913 |
| C | -10.2614547774 | -10.5480329803 | -2.4206625532 | O | -34.1549733986 | -36.4777114952 | -7.5351966428 |
| O | -5.9809169229  | -9.9030780304  | -2.0400018598 | O | -29.4735633259 | -39.072189668  | -9.1622547149 |
| O | -9.9546301292  | -5.9847981444  | -1.6443756037 | C | -34.4673204433 | -36.6440786593 | -6.158351432  |
| C | -5.5648754954  | -10.1945146168 | -3.3684169566 | H | -35.3861348446 | -36.0815990037 | -5.9805443395 |
| H | -4.7820561501  | -10.950985434  | -3.285765056  | H | -34.631806502  | -37.7016753699 | -5.915549967  |
| H | -6.3948173657  | -10.5904213    | -3.966687219  | H | -33.6683721198 | -36.2478848494 | -5.5193457653 |
| H | -5.1594189886  | -9.3010049483  | -3.859156901  | C | -28.7319953586 | -39.6686358585 | -8.1057393253 |
| C | -10.3139716276 | -5.3863715683  | -2.8832918848 | H | -27.8672607557 | -40.1473183222 | -8.5695237669 |
| H | -11.0948365004 | -4.6572091411  | -2.6580146008 | H | -28.3906403792 | -38.9147828986 | -7.3854551432 |
| H | -9.4554866822  | -4.8762930595  | -3.3385316412 | H | -29.3305957845 | -40.4240923347 | -7.5816913474 |
| H | -10.7045508734 | -6.1320145105  | -3.5867758862 | C | -33.8339588669 | -40.5211049256 | -9.0436387331 |
| S | -9.3098714004  | -14.9540994355 | -3.3098378285 | H | -34.495893373  | -41.3497405355 | -9.2624248161 |
| C | -12.982359833  | -13.9965324514 | -3.118932265  | F | -13.1272751919 | -10.4513204461 | -2.413345592  |
| C | -12.5091257978 | -11.6105391627 | -2.6421646206 | F | -14.6787084596 | -12.3916193337 | -2.7979689173 |
| C | -13.3840715036 | -12.7043322982 | -2.8614032245 | F | -17.203915042  | -23.3094253368 | -5.3897062811 |
| C | -11.5474746826 | -14.1393639854 | -3.1464355875 | F | -18.7512058465 | -25.2330348349 | -5.8539304793 |
| C | -10.6500651012 | -13.0174787706 | -2.9217849059 | F | -28.9924583189 | -30.4520693662 | -6.3403522741 |
| C | -11.1338207558 | -11.6853676232 | -2.6536025661 | F | -30.532161224  | -32.3955657654 | -6.7413299211 |

**Table S14.** The coordinate of **10** (240 atoms).

| Atom | Coordinates (Angstroms) |               |               | Atom | Coordinates (Angstroms) |                |               |
|------|-------------------------|---------------|---------------|------|-------------------------|----------------|---------------|
|      | X                       | Y             | Z             |      | X                       | Y              | Z             |
| C    | -17.6112740808          | 0.7593442416  | -1.1791030546 | C    | 9.501092967             | -12.2720794443 | -1.3461734306 |
| C    | -19.5894177027          | 2.1749433163  | -1.8342367743 | O    | 5.3466797857            | -10.2847719145 | -0.9842917141 |
| C    | -18.2429395595          | 1.9791880798  | -1.4761636167 | O    | 10.4719627812           | -8.2202518896  | -0.1117892095 |
| C    | -16.142679531           | 0.7467951804  | -0.9009355369 | C    | 4.8425149987            | -10.066119453  | -2.2964556934 |
| C    | -15.5911136641          | -0.3845499035 | -0.2869651137 | H    | 3.850577709             | -10.5212994693 | -2.3244227142 |
| C    | -14.2341048814          | -0.4618637426 | -0.0167823296 | H    | 4.7602165656            | -8.9942333173  | -2.5158784985 |
| C    | -13.369579188           | 0.5869375071  | -0.363486771  | H    | 5.4835312622            | -10.5399157237 | -3.0501684426 |
| C    | -13.9190066175          | 1.7110626389  | -0.999102383  | C    | 11.1107154517           | -7.7216033419  | -1.2809164642 |
| C    | -15.278447169           | 1.7905867218  | -1.2573955606 | H    | 12.0867491655           | -7.3497646138  | -0.9630444931 |
| H    | -17.6262789867          | 2.8658577251  | -1.4398218314 | H    | 11.2459562364           | -8.5139938248  | -2.0276337109 |
| H    | -16.2517408789          | -1.2055126808 | -0.0283185943 | H    | 10.5345486989           | -6.901424423   | -1.7268699485 |
| H    | -13.8385282322          | -1.3423108918 | 0.483567112   | C    | 6.3141287964            | -6.2529352319  | 0.3043298474  |
| H    | -13.2645385758          | 2.5139713442  | -1.3259656635 | C    | 3.8630845662            | -3.2842946814  | 1.0458190883  |
| H    | -15.6561033661          | 2.6612112571  | -1.7842625897 | C    | 5.1439417311            | -2.8810877481  | 1.3823823082  |
| C    | -20.0774579446          | 3.5693296447  | -2.0659404319 | C    | 6.1212600172            | -3.8674469123  | 1.1608474346  |
| C    | -19.4623074015          | 4.6926540918  | -1.5003607282 | C    | 5.6099772711            | -5.0438533411  | 0.6516592663  |
| C    | -21.2150925301          | 3.7539701184  | -2.8612941747 | S    | 3.8955647419            | -4.9239122539  | 0.4413925192  |
| C    | -19.961639932           | 5.9683948738  | -1.7394575157 | H    | 5.3534425077            | -1.8967314812  | 1.7776488064  |
| H    | -18.6076143496          | 4.572324155   | -0.8413646477 | H    | 7.17498657              | -3.7238769669  | 1.3762512556  |
| C    | -21.7070599422          | 5.0295155277  | -3.1092540102 | S    | 12.6489928719           | -19.672731827  | -3.119927244  |
| H    | -21.7056075625          | 2.8782755765  | -3.2742068498 | C    | 15.7153190996           | -17.4370281291 | -2.9266055973 |

|    |                |               |               |   |               |                |               |
|----|----------------|---------------|---------------|---|---------------|----------------|---------------|
| C  | -21.0802950812 | 6.1418224459  | -2.5509937933 | C | 14.4077303984 | -15.4020906187 | -2.3923663072 |
| H  | -19.4792811498 | 6.8293572078  | -1.2844933299 | C | 15.6175417798 | -16.0923360706 | -2.6385903406 |
| H  | -22.585352806  | 5.1567099616  | -3.7365000871 | C | 14.433257027  | -18.0964990754 | -2.9509508512 |
| H  | -21.467186489  | 7.1395842475  | -2.7402970574 | C | 13.1896954401 | -17.3869720878 | -2.6964584315 |
| O  | -18.1735439695 | -0.3781741978 | -1.0842889764 | C | 13.1541794426 | -15.9757020194 | -2.4033188202 |
| O  | -20.4598657039 | 1.2692928526  | -2.0324714371 | N | 12.1225855564 | -18.1775842358 | -2.766401338  |
| Ir | -20.2126665718 | -0.8378939683 | -1.6231183989 | N | 14.2460490624 | -19.3892387525 | -3.2005351356 |
| C  | -22.1305874942 | -1.1697262318 | -2.0099186446 | C | 11.9310541215 | -15.2427998019 | -2.1498755859 |
| C  | -22.6878558613 | -1.575431534  | -3.2254725961 | C | 10.63665082   | -15.733501809  | -2.1336360475 |
| C  | -22.9993344956 | -0.9186908268 | -0.9102891028 | C | 9.6667312411  | -14.7546463094 | -1.8556914526 |
| C  | -24.0615667914 | -1.7104418016 | -3.3425790916 | C | 10.1971272316 | -13.4969825972 | -1.6522016992 |
| H  | -22.0696031907 | -1.788714719  | -4.0908874451 | S | 11.9204341889 | -13.526725344  | -1.8171569672 |
| C  | -24.3776556207 | -1.0720224009 | -1.0904191702 | H | 10.4125519007 | -16.7753553058 | -2.3160502854 |
| C  | -24.9360349953 | -1.4638960251 | -2.2916642532 | H | 8.6044584188  | -14.966492537  | -1.7923048023 |
| H  | -26.0075700148 | -1.5757324475 | -2.4022944741 | C | 25.5572921423 | -19.1657870659 | -4.2354066838 |
| C  | -22.3439944804 | -0.5273308438 | 0.3289903994  | C | 25.4173891283 | -17.8079523722 | -3.8399791558 |
| C  | -22.9514392389 | -0.2443406254 | 1.5590080631  | C | 23.0462079769 | -18.0465102798 | -3.6589787093 |
| C  | -22.1714077116 | 0.0901276824  | 2.654215156   | C | 23.1869974882 | -19.4061581526 | -4.0473871823 |
| H  | -24.0278900683 | -0.2926495944 | 1.6413059125  | C | 24.4179807346 | -19.9809536396 | -4.3266924485 |
| C  | -20.2347146968 | -0.1441242554 | 1.2864891855  | C | 26.9167039897 | -19.5021724129 | -4.5042320508 |
| C  | -20.785321666  | 0.1405349998  | 2.5237267497  | H | 27.22542093   | -20.4806721452 | -4.85597466   |
| H  | -22.6442225628 | 0.3082047092  | 3.6076623485  | C | 21.6810609083 | -17.6960907269 | -3.4425395948 |
| H  | -19.1657221743 | -0.1313308903 | 1.1047169121  | S | 21.643673398  | -20.2069724736 | -4.1359338212 |
| H  | -20.1400472618 | 0.3942757897  | 3.3575861189  | H | 21.3650503595 | -16.6977782922 | -3.1596455447 |
| C  | -19.0637068582 | -2.5815350612 | -3.6440594128 | S | 26.9563933225 | -16.9944221546 | -3.8004247446 |
| C  | -19.4098523405 | -0.4124872172 | -4.4733155102 | C | 24.1882993983 | -17.2388744494 | -3.5399933351 |
| C  | -18.5137736353 | -2.9622649962 | -4.8748321002 | C | 27.7833722194 | -18.4593969719 | -4.3158576309 |
| C  | -18.8785946593 | -0.7389973513 | -5.7086424803 | O | 24.0914652711 | -15.925074627  | -3.1779149194 |
| H  | -19.7907753905 | 0.5765168208  | -4.2432642379 | O | 24.5095556954 | -21.2874894562 | -4.7152681519 |
| C  | -18.420623009  | -2.0400773098 | -5.904828549  | C | 24.1143473053 | -15.7164999476 | -1.7709596153 |
| H  | -18.1689011717 | -3.9776354054 | -5.0086453508 | H | 24.0365114853 | -14.638213526  | -1.6186861275 |
| H  | -18.8271552604 | 0.0105834249  | -6.4906679891 | H | 23.2693084225 | -16.2176450359 | -1.2824474116 |
| H  | -17.9942566836 | -2.3370888025 | -6.8588158235 | H | 25.0515545275 | -16.0808795601 | -1.3323424649 |
| C  | -19.2659406906 | -3.4182888978 | -2.4701107388 | C | 24.7739021965 | -22.1858395272 | -3.6445200191 |
| C  | -18.9300321631 | -4.7718316329 | -2.3673859343 | H | 24.8139863304 | -23.1844936257 | -4.0838512861 |
| C  | -19.874153975  | -2.7741458143 | -1.355413191  | H | 25.7335259897 | -21.958324552  | -3.1637015376 |
| C  | -19.1717319958 | -5.5181320068 | -1.2303030761 | H | 23.9765162872 | -22.1490710649 | -2.8919633151 |
| C  | -20.1315385303 | -3.5257752551 | -0.205718287  | C | 20.8127706787 | -18.7344091045 | -3.6480815488 |
| C  | -19.7784081242 | -4.8648314465 | -0.1649270136 | C | 16.9681280082 | -18.1174613772 | -3.1807452213 |
| H  | -18.9027064142 | -6.5659501396 | -1.1789488793 | C | 17.1595694718 | -19.4538107308 | -3.4872172731 |
| H  | -20.6042126172 | -3.0861310424 | 0.6662826582  | C | 18.5081917598 | -19.7993662421 | -3.6804089127 |
| N  | -19.4962789296 | -1.3008744476 | -3.4741447532 | C | 19.3765023288 | -18.7377511301 | -3.5256740184 |
| N  | -20.9868406291 | -0.464052069  | 0.2248466891  | S | 18.5077471502 | -17.2904581618 | -3.1388876186 |
| F  | -20.026865198  | -5.570876928  | 0.9456202546  | H | 16.3371802581 | -20.1512542489 | -3.5654874246 |

|   |                |                |               |   |               |                |               |
|---|----------------|----------------|---------------|---|---------------|----------------|---------------|
| F | -18.3453240323 | -5.4074421887  | -3.4005712022 | H | 18.8381998562 | -20.8037216225 | -3.924762008  |
| F | -25.2267507857 | -0.8361203425  | -0.072027636  | S | 35.9089447375 | -17.4565596815 | -5.2124804226 |
| F | -24.5814582284 | -2.0947715801  | -4.5153556161 | C | 35.4264004185 | -21.1949080573 | -5.6908677563 |
| C | -9.7227265918  | 1.1455822055   | 0.3311847644  | C | 32.9730481177 | -21.0921368267 | -5.3628305462 |
| C | -9.5948032555  | -0.2690615232  | 0.3032331817  | C | 34.1813675879 | -21.7821995309 | -5.6168409103 |
| C | -7.2383571116  | -0.1183311505  | 0.6742645175  | C | 35.3832250037 | -19.7692815256 | -5.4792094769 |
| C | -7.3692061096  | 1.2960618832   | 0.7211484684  | C | 34.1408902912 | -19.0597928549 | -5.2182086524 |
| C | -8.5888765867  | 1.9386944871   | 0.5651295091  | C | 32.8679479557 | -19.7336758495 | -5.1529952886 |
| C | -11.0703665685 | 1.5592122012   | 0.0998121404  | N | 34.3201733283 | -17.7525544396 | -5.0522518292 |
| H | -11.3751403565 | 2.5994315861   | 0.0889242414  | N | 36.441426674  | -18.9640091047 | -5.4981177045 |
| C | -5.8832804492  | -0.5318225029  | 0.8427596996  | C | 31.615828825  | -19.0531022363 | -4.8948184457 |
| S | -5.8271177951  | 2.0699499941   | 0.9606964008  | C | 31.4141105692 | -17.70008555   | -4.6825565099 |
| H | -5.5759888487  | -1.5719060703  | 0.8310965362  | C | 30.068555747  | -17.3595992678 | -4.4591436573 |
| S | -11.1246043226 | -1.0375850709  | -0.0073954421 | C | 29.2134697834 | -18.4421025226 | -4.4968430803 |
| C | -8.3776476684  | -0.9132414502  | 0.479354373   | S | 30.0908631682 | -19.9027995482 | -4.8050489359 |
| C | -11.9353870124 | 0.5193705919   | -0.0911945742 | H | 32.2266521435 | -16.9869191708 | -4.6948423534 |
| O | -8.287431911   | -2.2751994061  | 0.4221548476  | H | 29.7299370133 | -16.3433667276 | -4.286051251  |
| O | -8.6742762379  | 3.3029008914   | 0.5965080176  | C | 41.8047849154 | -28.7627205931 | -7.5928598079 |
| C | -8.3998637634  | -2.9101290118  | 1.689724173   | C | 40.514885966  | -29.3315136072 | -7.4205510914 |
| H | -8.3184105025  | -3.9830088153  | 1.5046862198  | C | 39.5539175278 | -27.1758905581 | -7.0394513216 |
| H | -7.5950174389  | -2.5922763011  | 2.3644838985  | C | 40.8433696016 | -26.6070165678 | -7.218945863  |
| H | -9.368431619   | -2.6927069599  | 2.1568482334  | C | 41.9650627286 | -27.3723462599 | -7.5028230737 |
| C | -8.9621636658  | 3.8252635951   | 1.8871550636  | C | 42.7985299668 | -29.7683928774 | -7.8380969941 |
| H | -8.9980817387  | 4.9112490472   | 1.7792243126  | H | 43.851095443  | -29.5482279713 | -7.9730952454 |
| H | -9.9297129981  | 3.4608567567   | 2.2549744865  | C | 38.5730001878 | -26.1824147344 | -6.7422870123 |
| H | -8.1794218984  | 3.5561290304   | 2.6072785116  | S | 40.8094642285 | -24.8767012603 | -7.0252622326 |
| S | 3.0909918845   | 1.0337397793   | 2.4075820803  | H | 37.5343484005 | -26.4205192971 | -6.539787883  |
| C | 2.6372108326   | -2.5186633742  | 1.138317481   | S | 40.5633269084 | -31.067642929  | -7.5649134996 |
| C | 0.1858252836   | -2.2885608275  | 0.8642689357  | C | 39.3876765939 | -28.5630663684 | -7.1556669359 |
| C | 1.3975376713   | -3.0147874232  | 0.7956550739  | O | 38.1653282356 | -29.1461746716 | -6.9758093622 |
| C | 2.5836060741   | -1.1518273425  | 1.594071481   | O | 43.1916545098 | -26.7864557168 | -7.6500651393 |
| C | 1.3378971952   | -0.4041928143  | 1.6624248902  | C | 37.3884978162 | -29.2266062436 | -8.1642921316 |
| C | 0.0718267114   | -0.9798777971  | 1.2822691331  | H | 36.4515539509 | -29.7137114507 | -7.8869622543 |
| N | 1.5069636515   | 0.8377131732   | 2.1070447534  | H | 37.1769741994 | -28.2283449134 | -8.5678653282 |
| N | 3.6341579501   | -0.43904208    | 1.9900924448  | H | 37.8980250282 | -29.8242287463 | -8.9303505555 |
| C | -5.0140507173  | 0.5105092555   | 1.0145368458  | C | 43.531198327  | -26.5042198221 | -9.0013087773 |
| C | -1.1825118735  | -0.2570848809  | 1.3291173388  | H | 44.5195604998 | -26.0405339195 | -8.9802075474 |
| C | -1.3912630502  | 1.0585066703   | 1.7059829069  | H | 43.570110914  | -27.422355787  | -9.6010809983 |
| C | -2.7375982219  | 1.4585357817   | 1.6319031184  | H | 42.8122502584 | -25.80996305   | -9.4540294764 |
| C | -3.5846531841  | 0.4582237691   | 1.2013006379  | C | 39.0790865871 | -24.9120873768 | -6.703700035  |
| S | -2.7000562954  | -0.9917878301  | 0.8687761952  | C | 36.6479345266 | -21.9275110318 | -5.9522676941 |
| H | -0.5837347161  | 1.7009177965   | 2.0288284486  | C | 37.9361804235 | -21.4276055318 | -6.0328303387 |
| H | -3.0837362692  | 2.4506505182   | 1.9023919481  | C | 38.9055720216 | -22.4097983971 | -6.3016345665 |
| C | 9.0423132815   | -10.0625547731 | -0.7388836285 | C | 38.3813521213 | -23.6796096022 | -6.4317189656 |

|   |               |                |               |   |               |                |               |
|---|---------------|----------------|---------------|---|---------------|----------------|---------------|
| C | 7.7269886329  | -10.5559202892 | -0.9537022456 | S | 36.6626830554 | -23.654648488  | -6.2225937932 |
| C | 6.7779106996  | -8.444349007   | -0.3610078416 | H | 38.1572470047 | -20.3780014615 | -5.8969000361 |
| C | 8.093133161   | -7.949291761   | -0.1500915464 | H | 39.9652853834 | -22.1945851615 | -6.3911096067 |
| C | 9.2247921168  | -8.728552668   | -0.3407333036 | C | 42.2771079244 | -31.0201554917 | -7.8540282127 |
| C | 10.0286467395 | -11.0675062843 | -0.9658532705 | H | 42.8095386065 | -31.9503804333 | -8.0079466685 |
| H | 11.0898459631 | -10.8999356731 | -0.8164847495 | F | 34.0432936506 | -23.0989092394 | -5.7899800179 |
| C | 5.7887442447  | -7.454551552   | -0.0881024566 | F | 16.7137511427 | -15.3326210774 | -2.5753378957 |
| S | 8.0722457064  | -6.2869556462  | 0.3683524345  | F | 1.2691182672  | -4.268013988   | 0.3536829891  |
| H | 4.7238705533  | -7.6482779188  | -0.1586815103 | F | -0.8939962276 | -2.9729066912  | 0.4791065285  |
| S | 7.7446734635  | -12.2285763184 | -1.4363243998 | F | 14.5528745332 | -14.0994792125 | -2.1377498348 |
| C | 6.5962473357  | -9.7707263714  | -0.7827883004 | F | 31.8859305946 | -21.8669649032 | -5.3353163444 |

**Table S15.** The coordinate of **11** (240 atoms).

| Atom | Coordinates (Angstroms) |               |               | Atom | Coordinates (Angstroms) |               |               |
|------|-------------------------|---------------|---------------|------|-------------------------|---------------|---------------|
|      | X                       | Y             | Z             |      | X                       | Y             | Z             |
| C    | 26.2669176552           | -5.5135813887 | -0.9853384118 | O    | 1.5203386913            | -0.2027960563 | 1.0665731235  |
| C    | 28.691597242            | -5.8944002295 | -1.5543809549 | O    | -2.0554864256           | 2.4683742522  | -2.3057112723 |
| C    | 27.4244922555           | -5.3167962429 | -1.7575243189 | C    | 2.0584297197            | 0.6001875757  | 2.1107449844  |
| C    | 25.0168733892           | -4.7869416375 | -1.3621995835 | H    | 2.7213057283            | -0.0484930828 | 2.6865527856  |
| C    | 23.7906513114           | -5.2952649531 | -0.9175979876 | H    | 2.6311747226            | 1.4438990656  | 1.7056287515  |
| C    | 22.5968349113           | -4.6780472662 | -1.2558287046 | H    | 1.2652337283            | 0.9838854349  | 2.764092552   |
| C    | 22.5833659115           | -3.512471892  | -2.0363243535 | C    | -2.2917457239           | 3.8278018819  | -1.9580606439 |
| C    | 23.8161755461           | -2.9805500821 | -2.4463856482 | H    | -2.9923429675           | 4.217045515   | -2.6993117372 |
| C    | 25.0075296573           | -3.6103562543 | -2.1228015921 | H    | -2.733911278            | 3.9078275765  | -0.9569029875 |
| H    | 27.3309750968           | -4.6526688841 | -2.6051200542 | H    | -1.36449203             | 4.4128340142  | -1.9905835076 |
| H    | 23.7933534064           | -6.1897992695 | -0.3033205753 | C    | 2.540902607             | 2.0109311661  | -2.5221060915 |
| H    | 21.6586219091           | -5.1166923808 | -0.9252091975 | C    | 6.112673082             | 2.4199316764  | -4.1353116019 |
| H    | 23.8395371419           | -2.0477822137 | -3.0022166551 | C    | 5.2060282827            | 3.1079080834  | -4.9034048912 |
| H    | 25.9417134013           | -3.1530185284 | -2.4340723933 | C    | 3.8825951617            | 3.0441509563  | -4.4149579793 |
| C    | 29.7862742631           | -5.5954301167 | -2.5283080094 | C    | 3.7371127623            | 2.3015921333  | -3.2700353556 |
| C    | 29.5428185017           | -5.1847852    | -3.8445229571 | S    | 5.2849958472            | 1.669002478   | -2.798134326  |
| C    | 31.1123680784           | -5.7597725111 | -2.1092588831 | S    | -9.49590103             | -0.2731914198 | 6.2373417826  |
| C    | 30.5988377675           | -4.9286951109 | -4.7125008682 | C    | -11.0649978611          | -0.6079823526 | 2.8110767807  |
| H    | 28.5239154699           | -5.0948963838 | -4.2090704084 | C    | -8.9147442861           | -0.5733866668 | 1.5862268317  |
| C    | 32.1673492947           | -5.4931440337 | -2.9732356224 | C    | -10.3235594625          | -0.5941045044 | 1.6485908182  |
| H    | 31.295910386            | -6.1053963904 | -1.0969772997 | H    | -8.4654830381           | -0.6231501403 | 0.599137082   |
| C    | 31.9140691891           | -5.0741916864 | -4.2777923451 | C    | -10.2809430811          | -0.5199744949 | 4.0084810576  |
| H    | 30.3932853837           | -4.6210949957 | -5.7342763887 | C    | -8.8354028224           | -0.4920755971 | 3.9686690319  |
| H    | 33.1908622098           | -5.6168962629 | -2.6296039226 | C    | -8.1313123281           | -0.5502794227 | 2.7210318422  |
| H    | 32.7382043802           | -4.8700673523 | -4.9561475924 | N    | -8.2767927157           | -0.3515552134 | 5.169146672   |
| O    | 26.139277013            | -6.301293148  | 0.0057370177  | N    | -10.7725377395          | -0.4017356878 | 5.240444809   |
| O    | 29.0358430956           | -6.6394500865 | -0.5833195387 | C    | -6.6815769638           | -0.5409467319 | 2.6542580182  |
| Ir   | 27.7237944427           | -7.4309596521 | 0.9381136516  | C    | -5.7631728746           | -1.1662920803 | 3.4594295339  |
| C    | 29.1920341039           | -8.5520462537 | 1.6626097345  | C    | -4.4254974858           | -0.9778724312 | 3.0442189544  |

|   |               |                |               |   |                |               |               |
|---|---------------|----------------|---------------|---|----------------|---------------|---------------|
| C | 30.0545303103 | -8.2368885022  | 2.716116883   | C | -4.2822114135  | -0.2151743661 | 1.9117833265  |
| C | 29.3743377871 | -9.7870570289  | 0.9777413391  | S | -5.8542229458  | 0.2919829664  | 1.3670037757  |
| C | 31.0697942968 | -9.1140698394  | 3.0612758805  | C | -20.7526662846 | 0.9419295205  | 0.4654428697  |
| H | 29.9527806732 | -7.3140509429  | 3.277396135   | C | -19.9622996456 | 1.6969641073  | -0.4421437886 |
| C | 30.4182586277 | -10.6302583044 | 1.3713892871  | C | -17.9509014231 | 0.9239990625  | 0.5909359896  |
| C | 31.2803025459 | -10.3204669131 | 2.4052539666  | C | -18.7415764883 | 0.1681604358  | 1.4980682798  |
| H | 32.0797419602 | -10.9932445212 | 2.6902120235  | C | -20.1283248071 | 0.15458486    | 1.4450868567  |
| C | 28.4203501681 | -10.0604758298 | -0.0869737869 | C | -22.1458467697 | 1.118606682   | 0.2247610885  |
| C | 28.3557473025 | -11.2010890132 | -0.8977295238 | H | -22.9121824495 | 0.6404952908  | 0.8255326931  |
| C | 27.3608633321 | -11.3130715807 | -1.8555024475 | C | -16.5583237763 | 0.7794902136  | 0.8579616628  |
| H | 29.0856143721 | -11.9866601603 | -0.7640005709 | S | -17.7570043348 | -0.6909681966 | 2.6478831264  |
| C | 26.5375253519 | -9.1818963363  | -1.1795207076 | H | -15.7922259686 | 1.2971068192  | 0.2906347833  |
| C | 26.4288119673 | -10.2882736311 | -2.0034510054 | S | -20.9475842174 | 2.6006845193  | -1.5568909144 |
| H | 27.3119123852 | -12.1987811077 | -2.4825941741 | C | -18.5753259343 | 1.6920533202  | -0.4042770682 |
| H | 25.8477831425 | -8.3466013904  | -1.2314106897 | C | -22.4130767534 | 1.96542916    | -0.8174205654 |
| H | 25.6332368261 | -10.3389531121 | -2.7387102967 | O | -17.8442967823 | 2.4408759202  | -1.2820581527 |
| C | 27.1616608339 | -5.8663937111  | 3.3214285107  | O | -20.8668804948 | -0.5684133492 | 2.3381751652  |
| C | 28.7989779844 | -4.8422708157  | 1.9864219251  | C | -17.4593126376 | 1.7347024043  | -2.4557444621 |
| C | 27.2267342289 | -4.7940692381  | 4.2203160603  | H | -16.8991277592 | 2.4422186711  | -3.0700606393 |
| C | 28.9046725001 | -3.7624890096  | 2.8453739382  | H | -16.8211678195 | 0.8766039208  | -2.2097053235 |
| H | 29.3957941863 | -4.9322911382  | 1.0854859084  | H | -18.3368887532 | 1.383202066   | -3.0121014475 |
| C | 28.0968131728 | -3.7428694768  | 3.9802571157  | C | -21.122632754  | -1.9048826374 | 1.922484361   |
| H | 26.596275417  | -4.800295633   | 5.0979702934  | H | -21.7059983736 | -2.3683823165 | 2.720380337   |
| H | 29.6021055635 | -2.9619182753  | 2.6245587702  | H | -21.6976847821 | -1.9238532053 | 0.9880385082  |
| H | 28.1465241026 | -2.9124986007  | 4.6789154498  | H | -20.1888316911 | -2.463035864  | 1.7824912672  |
| C | 26.3358681673 | -7.0603742006  | 3.4296355369  | C | -16.2912718585 | -0.0513670236 | 1.9128455322  |
| C | 25.4435661596 | -7.3419569553  | 4.4688719475  | C | -12.5143849294 | -0.68668163   | 2.8403524285  |
| C | 26.4882740318 | -8.008863113   | 2.3786763377  | C | -13.30399495   | -1.3780687368 | 3.7255466337  |
| C | 24.7059174299 | -8.5085565251  | 4.5257164552  | C | -14.6880996464 | -1.2181114779 | 3.4976229519  |
| C | 25.7526779795 | -9.1956619711  | 2.4348484322  | C | -14.9964018938 | -0.4098312379 | 2.4320933444  |
| C | 24.8856385036 | -9.4191189869  | 3.4920730316  | S | -13.5262364326 | 0.1558610366  | 1.6987220343  |
| H | 24.0232432432 | -8.7013424574  | 5.3440986804  | S | -29.4557416757 | 5.8144715292  | -2.1954484708 |
| H | 25.8407915599 | -9.9556125969  | 1.6656438784  | C | -30.5602224915 | 2.275868965   | -1.4363436357 |
| N | 27.9539259163 | -5.857145187   | 2.2128656297  | C | -28.2641214536 | 1.3710151462  | -1.2496773559 |
| N | 27.5004992449 | -9.0693810198  | -0.2546156046 | C | -29.6677223014 | 1.2591346688  | -1.1701499693 |
| F | 24.1835053888 | -10.5588777377 | 3.5297262051  | H | -27.6877405976 | 0.4705031925  | -1.0611731497 |
| F | 25.2707550243 | -6.4625289884  | 5.4738290086  | C | -29.9422147523 | 3.531883124   | -1.7490911623 |
| F | 30.6218718216 | -11.8014880986 | 0.7384987715  | C | -28.5046615555 | 3.6707688205  | -1.8335417758 |
| F | 31.8915729292 | -8.7958899201  | 4.0695665952  | C | -27.6413148071 | 2.5500579729  | -1.6007429694 |
| C | 19.7640337623 | -1.575485039   | -3.5837442624 | N | -28.1078545935 | 4.9178406836  | -2.0789242852 |
| C | 18.9511771051 | -2.0995368879  | -2.5424274747 | N | -30.589877712  | 4.6806313073  | -1.9341858374 |
| C | 17.0422182315 | -0.9291404489  | -3.3764317568 | C | -26.1961469666 | 2.6626438778  | -1.6768150875 |
| C | 17.853363105  | -0.4076604229  | -4.4193457773 | C | -25.4147672448 | 3.3606802189  | -2.5625481929 |
| C | 19.1986222654 | -0.7256412465  | -4.5459826981 | C | -24.0279016853 | 3.1887418645  | -2.3504910549 |



|   |               |               |               |   |                |               |               |
|---|---------------|---------------|---------------|---|----------------|---------------|---------------|
| C | 21.1135510033 | -2.0313899202 | -3.4819756141 | C | -23.7100512116 | 2.3546627549  | -1.3074292635 |
| H | 21.8826309274 | -1.7528433993 | -4.1929610627 | S | -25.1778483259 | 1.7883671974  | -0.5662846805 |
| C | 15.7007556139 | -0.4558994079 | -3.4642919732 | C | -39.7158215022 | -0.6497559894 | 1.6248494975  |
| S | 16.9520264425 | 0.64917871    | -5.4686216727 | C | -38.7565076076 | -1.2677087681 | 2.4714119893  |
| H | 14.9330319121 | -0.7277768356 | -2.7476852126 | C | -36.9631424247 | -0.2126755124 | 1.2953544741  |
| S | 19.8733289658 | -3.1150331413 | -1.4714848655 | C | -37.9220976861 | 0.4076866611  | 0.4514019595  |
| C | 17.600972959  | -1.7991605087 | -2.4276170734 | C | -39.2877550383 | 0.2125083679  | 0.6059546755  |
| C | 21.331961482  | -2.8632271924 | -2.4205096497 | C | -41.0536542988 | -1.0429635995 | 1.9639757102  |
| O | 16.8433758783 | -2.3023715397 | -1.4081463    | H | -41.9303100512 | -0.7028691704 | 1.4252166328  |
| O | 19.956400508  | -0.1992367447 | -5.5540128514 | C | -35.6304370671 | 0.1373341672  | 0.9265503558  |
| C | 16.2513949055 | -3.5619222472 | -1.7019480395 | S | -37.1656259449 | 1.3951747406  | -0.7661955427 |
| H | 15.6907511193 | -3.853376673  | -0.8116219325 | H | -34.7565140822 | -0.254300685  | 1.4360631018  |
| H | 15.5685337606 | -3.4867849554 | -2.5578288063 | S | -39.52326701   | -2.3034591812 | 3.6454096589  |
| H | 17.0151205593 | -4.3196730758 | -1.9159089627 | C | -37.3904785339 | -1.055321209  | 2.3313374816  |
| C | 19.9772043832 | -0.9988412898 | -6.7302610299 | O | -36.4869378657 | -1.6744067877 | 3.1484455353  |
| H | 20.6006999163 | -0.4678124112 | -7.452233912  | O | -40.1815335814 | 0.8135219802  | -0.235924827  |
| H | 20.4093867821 | -1.9870381261 | -6.5281249848 | C | -36.192843501  | -0.9443311085 | 4.3328545603  |
| H | 18.9684552549 | -1.1240220816 | -7.1427663045 | H | -35.4753004805 | -1.5455190104 | 4.89484661    |
| S | 9.2068384839  | 5.5206056402  | -5.4246074417 | H | -35.7484788125 | 0.030628227   | 4.0954927145  |
| C | 7.5463125115  | 2.3009859916  | -4.3317613619 | H | -37.0941739667 | -0.7912660721 | 4.9391279273  |
| C | 9.6382626631  | 0.9786886889  | -4.3090929387 | C | -40.6672892557 | 2.0605845994  | 0.2439809948  |
| C | 8.2558152017  | 1.1442749601  | -4.0865818096 | H | -41.3580527015 | 2.4345194287  | -0.5144183208 |
| H | 10.051485046  | -0.0072979506 | -4.120181595  | H | -41.1989385441 | 1.9383241187  | 1.1962136627  |
| C | 8.3516104585  | 3.3982264546  | -4.7838310531 | H | -39.8494499624 | 2.7794891032  | 0.3781514389  |
| C | 9.772381151   | 3.2524993434  | -5.0153346776 | C | -35.5699483026 | 0.9867817414  | -0.1445099033 |
| C | 10.4302567837 | 1.9975250207  | -4.7954588828 | C | -32.0020133065 | 2.1146750575  | -1.3836092129 |
| N | 10.367048959  | 4.3868189636  | -5.3790679454 | C | -32.9473902381 | 2.6754086627  | -2.2061226994 |
| N | 7.9145782787  | 4.6405403802  | -4.9812377989 | C | -34.2750804326 | 2.3488369512  | -1.8528372613 |
| C | 15.4904893325 | 0.3846177954  | -4.5241867472 | C | -34.3837078466 | 1.5240420437  | -0.7615456101 |
| C | 11.8527290481 | 1.8200035202  | -5.0216299236 | S | -32.794441416  | 1.149750915   | -0.1673360406 |
| C | 12.6539424649 | 2.3133447249  | -6.0203834952 | C | -41.0921121796 | -1.904180502  | 3.0103622657  |
| C | 13.9933394339 | 1.8680487961  | -5.9430317259 | H | -41.969178017  | -2.3567802806 | 3.4557934636  |
| C | 14.2529865051 | 1.0217408171  | -4.8938182721 | F | -30.135519592  | 0.0518781975  | -0.831027819  |
| S | 12.79441502   | 0.7937787495  | -3.9748298916 | F | -10.9569389547 | -0.6328653355 | 0.4701493853  |
| C | -1.6411120592 | 1.1177025584  | -0.3544174152 | F | 7.6092698373   | 0.0666395021  | -3.6263456374 |
| C | -0.7116457383 | 0.4504719284  | 0.4877600415  | F | 14.899915392   | 2.2411997436  | -6.8418816461 |
| C | 1.1121158076  | 1.152374469   | -0.8870038144 | F | 12.2508793605  | 3.0801509602  | -7.0201496039 |
| C | 0.1835606872  | 1.8261192298  | -1.7255655657 | F | 5.4846785481   | 3.7459100935  | -6.0292292705 |
| C | -1.181015012  | 1.8308107427  | -1.472440043  | F | 2.8795523301   | 3.6474430868  | -5.0477649415 |
| C | -2.9821404654 | 0.9340880182  | 0.0910365359  | F | -3.4115420388  | -1.5251918037 | 3.7082853336  |
| H | -3.8380313984 | 1.3441626215  | -0.4344228917 | F | -6.0489038429  | -1.9362747265 | 4.4963453683  |
| C | 2.4467220602  | 1.2757908812  | -1.3710276266 | F | -12.8602380073 | -2.1710118819 | 4.688194389   |
| S | 0.9737593656  | 2.589678581   | -3.0759145049 | F | -15.592281053  | -1.8305119307 | 4.2579299738  |
| H | 3.2961058063  | 0.8090750934  | -0.8837886426 | F | -23.12890065   | 3.786285049   | -3.1275259971 |

|   |               |               |              |   |                |              |               |
|---|---------------|---------------|--------------|---|----------------|--------------|---------------|
| S | -1.5057495946 | -0.3761373955 | 1.7972085964 | F | -25.8623930775 | 4.0870353377 | -3.5735866916 |
| C | 0.6548705133  | 0.4659822866  | 0.248592743  | F | -32.6910668591 | 3.4204865172 | -3.2700061327 |
| C | -3.0776916302 | 0.1685346271  | 1.2222988718 | F | -35.3109040598 | 2.80475072   | -2.5530524774 |

**Table S16.** The coordinate of PTB7Ir/PC<sub>71</sub>BM (311 atoms).

| Atom | Coordinates (Angstroms) |               |               | Atom | Coordinates (Angstroms) |                |               |
|------|-------------------------|---------------|---------------|------|-------------------------|----------------|---------------|
|      | X                       | Y             | Z             |      | X                       | Y              | Z             |
| C    | 23.6886728155           | 2.064239032   | -0.4681376462 | C    | 9.7317750362            | -7.684341666   | 0.2606816669  |
| C    | 26.1379865991           | 1.902581981   | 0.0971860285  | O    | 8.5923968199            | -9.722330599   | 0.2769552562  |
| C    | 24.8064647005           | 1.4489204529  | 0.1214961182  | C    | 8.6078145263            | -11.1459379269 | 0.1989115174  |
| C    | 22.3542290354           | 1.405870168   | -0.338678777  | H    | 7.5672783923            | -11.4541248184 | 0.2993610003  |
| C    | 21.2038869343           | 2.1954600101  | -0.4525402724 | H    | 9.0160523823            | -11.4741676765 | -0.760741501  |
| C    | 19.9409449916           | 1.6381991832  | -0.330715921  | H    | 9.2142095662            | -11.5687444182 | 1.0043880905  |
| C    | 19.7794498118           | 0.2617934071  | -0.1121792828 | C    | 9.7953559412            | -9.1464186953  | 0.1740034384  |
| C    | 20.9326796397           | -0.5317704804 | -0.0177189463 | O    | 10.8350209176           | -9.7533062098  | 0.0243383296  |
| C    | 22.1953181522           | 0.0301421045  | -0.1293501144 | C    | 5.0679845041            | -2.7450554164  | 1.6141185815  |
| H    | 24.6199912144           | 0.5340087282  | 0.6663730185  | C    | 4.4472640695            | -3.8021282509  | 0.8946943118  |
| H    | 21.3202632618           | 3.2562494946  | -0.6496884649 | C    | 2.275790954             | -2.9665858236  | 1.4453307482  |
| H    | 19.0641769308           | 2.2726265752  | -0.4336800912 | C    | 2.8993028551            | -1.9129423655  | 2.1678440389  |
| H    | 20.8339700341           | -1.5981784726 | 0.1640622966  | C    | 4.2764392391            | -1.7793754077  | 2.2566870271  |
| H    | 23.0650420909           | -0.6174203323 | -0.0715746169 | C    | 6.4871402687            | -2.8550368593  | 1.5943093555  |
| C    | 27.1741819953           | 1.1397777785  | 0.8589058393  | H    | 7.1425929758            | -2.179522807   | 2.1327360902  |
| C    | 26.8643659419           | 0.3224117233  | 1.9525880567  | C    | 0.854699387             | -2.8932775246  | 1.522284497   |
| C    | 28.5145327257           | 1.2718327463  | 0.4755555538  | S    | 1.7246126976            | -0.858426218   | 2.9016640206  |
| C    | 27.8677892859           | -0.3586106108 | 2.6333532247  | H    | 0.199619154             | -3.6354438556  | 1.0792801709  |
| H    | 25.8384444636           | 0.2403483658  | 2.2989527976  | S    | 5.6232941534            | -4.8953838367  | 0.2235297169  |
| C    | 29.5154725905           | 0.5822397432  | 1.1486919152  | C    | 3.067933497             | -3.9235786727  | 0.7919472458  |
| H    | 28.7528386496           | 1.9290216031  | -0.3547117846 | C    | 6.941806914             | -3.941767142   | 0.8904540061  |
| C    | 29.1951090434           | -0.2376296306 | 2.2290161403  | C    | 0.4055567015            | -1.8291421839  | 2.2600289495  |
| H    | 27.6123539042           | -0.9805462081 | 3.4870990188  | O    | 2.4949400777            | -4.9592879601  | 0.1103223267  |
| H    | 30.5499123546           | 0.6880389122  | 0.8328384275  | O    | 4.8387805237            | -0.7678573598  | 2.979979255   |
| H    | 29.9777299122           | -0.7735698859 | 2.7594557091  | C    | 2.2846088346            | -4.6899645563  | -1.2707581678 |
| O    | 23.6702883421           | 3.1776001591  | -1.0836307437 | H    | 1.8355293731            | -5.5902533042  | -1.6946400837 |
| O    | 26.5851828944           | 2.9008108141  | -0.5512165344 | H    | 1.6037508371            | -3.8403532906  | -1.4075814547 |
| Ir   | 25.4041522579           | 4.3356592641  | -1.6532758313 | H    | 3.2315662216            | -4.4794272732  | -1.7827823968 |
| C    | 27.0223643787           | 5.4238885232  | -2.0193921351 | C    | 5.1770855376            | 0.3771751756   | 2.2059895765  |
| C    | 27.8361728961           | 5.3706801618  | -3.1543956021 | H    | 5.6084429126            | 1.1000182193   | 2.900931989   |
| C    | 27.376450116            | 6.3140700166  | -0.9661302511 | H    | 5.9131839921            | 0.1285307036   | 1.4312732605  |
| C    | 28.9687753554           | 6.1650494816  | -3.2271234374 | H    | 4.2875483436            | 0.8108495122   | 1.7327617845  |
| H    | 27.6054116455           | 4.7168788735  | -3.9889927645 | C    | 16.6936846301           | -1.8780780832  | -0.0883331387 |
| C    | 28.5322723582           | 7.0900785434  | -1.0978800317 | C    | 16.0202173534           | -0.7379436871  | 0.4276112633  |
| C    | 29.3463894372           | 7.0357580407  | -2.2125422442 | C    | 13.941494999            | -1.9152400177  | 0.4701633677  |
| H    | 30.2354536631           | 7.6495279554  | -2.288659525  | C    | 14.6130266366           | -3.0529491323  | -0.0526886338 |

|   |                |               |               |   |               |               |               |
|---|----------------|---------------|---------------|---|---------------|---------------|---------------|
| C | 26.4656296539  | 6.3350176836  | 0.1689398485  | C | 15.9741494707 | -3.0595206404 | -0.3238254316 |
| C | 26.5609303125  | 7.1264676102  | 1.3207309987  | C | 18.0797749267 | -1.615237136  | -0.3163270099 |
| C | 25.5839908681  | 7.0422678604  | 2.2997843816  | H | 18.7533624014 | -2.3410878465 | -0.7575791471 |
| H | 27.3986863987  | 7.7999603611  | 1.4318080102  | C | 12.5520623552 | -2.1621167756 | 0.6665568686  |
| C | 24.466172391   | 5.4064716447  | 0.9763362638  | S | 13.512996738  | -4.378140668  | -0.3122195657 |
| C | 24.5110329737  | 6.1699833023  | 2.1296124561  | H | 11.8712302405 | -1.4207433876 | 1.0700084431  |
| H | 25.6586289149  | 7.6578803082  | 3.1917521641  | S | 17.1061702286 | 0.6082581463  | 0.6151861618  |
| H | 23.6638558777  | 4.7072876359  | 0.7673366315  | C | 14.6650366236 | -0.7404501599 | 0.7263236369  |
| H | 23.7241745449  | 6.0780572049  | 2.8702240521  | C | 18.4535570811 | -0.3417735642 | 0.0068679327  |
| C | 24.6406007846  | 3.7814943105  | -4.4020388621 | C | 12.168358108  | -3.4268778523 | 0.305194275   |
| C | 26.0947900912  | 2.1395649565  | -3.565811954  | O | 14.0480937368 | 0.3759040747  | 1.214204264   |
| C | 24.5554813298  | 3.0857617886  | -5.6148925838 | O | 16.5832956417 | -4.1688222042 | -0.8390322904 |
| C | 26.0490369605  | 1.4177030006  | -4.7454792231 | C | 14.0042473143 | 0.429337026   | 2.6361260022  |
| H | 26.688227476   | 1.8275437479  | -2.7135736509 | H | 13.4981013881 | 1.3619068145  | 2.8931779062  |
| C | 25.2589679314  | 1.9043093301  | -5.7847640688 | H | 13.4417315116 | -0.4171007437 | 3.0483715574  |
| H | 23.9398049133  | 3.4824857967  | -6.4093993832 | H | 15.0147419189 | 0.4323462448  | 3.0629912993  |
| H | 26.6181929746  | 0.4994227986  | -4.8399450773 | C | 17.1221726991 | -5.0364127548 | 0.1510205048  |
| H | 25.1925969408  | 1.3664398758  | -6.7262476486 | H | 17.5644142317 | -5.878182895  | -0.3854531519 |
| C | 23.9990949084  | 5.0428854333  | -4.0619958497 | H | 17.8958515356 | -4.5292583668 | 0.7414066158  |
| C | 23.1687558288  | 5.787927229   | -4.9053070605 | H | 16.3387772449 | -5.4047469719 | 0.8247412461  |
| C | 24.2763722061  | 5.5388237236  | -2.7567282932 | C | 10.8458813368 | -3.9896610266 | 0.3722728291  |
| C | 22.6089912472  | 6.9933886287  | -4.5289684837 | C | 9.2217860505  | -0.6041579354 | 10.0005679893 |
| C | 23.7221409112  | 6.7630020643  | -2.3730080645 | C | 10.5070127845 | -0.6769902716 | 10.7491723116 |
| C | 22.9079877638  | 7.4563728785  | -3.2537226503 | C | 11.5327652294 | -0.3178505611 | 9.7288986015  |
| H | 21.9698900366  | 7.5502030145  | -5.2030933852 | C | 10.8683436673 | 0.2182062121  | 8.5727227405  |
| H | 23.9119286585  | 7.1909520632  | -1.3942243254 | C | 9.8213700755  | -6.8714682148 | 4.9509685011  |
| N | 25.4118401212  | 3.279992189   | -3.3968870487 | C | 9.6029211585  | -7.5630616644 | 6.2014671661  |
| N | 25.4115900993  | 5.4830486851  | 0.0302291353  | C | 10.8935531752 | -7.8227680364 | 6.8006989199  |
| F | 22.3799245346  | 8.6258205319  | -2.8703401689 | C | 11.9087390349 | -7.2856546551 | 5.9211885996  |
| F | 22.8818620481  | 5.3428288562  | -6.1435090517 | C | 11.2453692854 | -6.6997106837 | 4.77825602    |
| F | 28.8980410294  | 7.9369454463  | -0.116463452  | C | 9.4488245934  | 0.0452486167  | 8.7420362288  |
| F | 29.7422751518  | 6.0997731357  | -4.3184690895 | C | 8.2379760799  | -1.5729617594 | 10.0875965076 |
| C | -15.1306535268 | -5.2139409371 | -2.3224674701 | C | 10.7672964642 | -2.072971345  | 11.510769823  |
| C | -13.2039199986 | -4.160807638  | -1.5029118184 | C | 12.701213292  | -1.0366101446 | 9.5432892024  |
| C | -14.5546421336 | -3.9644487039 | -1.9280379456 | C | 11.4301122598 | 0.1084987243  | 7.2976108132  |
| C | -14.9847464342 | -2.6455543731 | -1.804849627  | C | 8.9503003321  | -5.8537778259 | 4.5649914954  |
| S | -13.6759814821 | -1.6782336336 | -1.2081970412 | C | 8.5231266669  | -7.2126605102 | 7.0081272609  |
| S | -12.6975890877 | -5.8257341184 | -1.6090919601 | C | 11.0482397718 | -7.7202451185 | 8.1800830683  |
| F | -16.3799099369 | -5.3111133616 | -2.7489713473 | C | 13.0349531697 | -6.6684711388 | 6.4606540967  |
| C | -14.2807782764 | -6.2749962309 | -2.219709788  | C | 11.7372963973 | -5.5181746371 | 4.2258904872  |
| O | -15.7153820107 | -7.949910086  | -2.9887585751 | C | 8.6430967571  | -0.2288608807 | 7.633794355   |
| C | -15.957968721  | -9.3202041681 | -3.3006877424 | C | 8.4781042812  | -2.8321210777 | 10.7842303257 |
| H | -16.9880722142 | -9.3600296037 | -3.6542554246 | C | 11.9942488774 | -2.8073257847 | 11.1075621562 |
| H | -15.2700867749 | -9.6651308732 | -4.0772678379 | C | 13.2710873994 | -1.1801042694 | 8.2297523647  |

|   |                |               |               |   |               |               |               |
|---|----------------|---------------|---------------|---|---------------|---------------|---------------|
| H | -15.8309614478 | -9.9448199794 | -2.4125065311 | C | 10.5969414256 | -0.1980947091 | 6.1604762498  |
| C | -14.4861887038 | -7.6935341598 | -2.5287052727 | C | 7.8415961153  | -5.4881136853 | 5.4101763222  |
| O | -13.6218267247 | -8.5311810153 | -2.3772611664 | C | 8.6914858822  | -7.0991365369 | 8.436154839   |
| C | -17.930773604  | -0.3751870334 | -2.0133142964 | C | 12.2141330839 | -7.0739312788 | 8.7335872907  |
| C | -18.4177400854 | -1.2279226049 | -3.0397508418 | C | 13.5328829627 | -5.4409113697 | 5.8894582304  |
| C | -20.3768718907 | 0.1162955592  | -3.2987484592 | C | 10.8310016557 | -4.4684702526 | 3.8312566449  |
| C | -19.8886172623 | 0.9705658158  | -2.2732635463 | C | 9.4665623825  | -4.6327918827 | 3.9983291959  |
| C | -18.6770784108 | 0.7495728246  | -1.6312134076 | C | 7.6302306775  | -6.1531321385 | 6.6058858628  |
| C | -16.6908509037 | -0.8403571424 | -1.4872360788 | C | 9.9270482181  | -7.3512226284 | 9.0109016193  |
| H | -16.1784409315 | -0.35598146   | -0.663191953  | C | 13.1851939177 | -6.5567991538 | 7.8910214003  |
| C | -21.6524842794 | 0.5534668382  | -3.7893890666 | C | 12.8963886616 | -4.8784934283 | 4.7957861708  |
| S | -21.0037811896 | 2.2696476885  | -1.9466504633 | C | 9.2326314408  | -0.3635847749 | 6.3247163881  |
| H | -22.2085902638 | 0.028478415   | -4.5571785599 | C | 7.4271802629  | -1.8848358216 | 8.9389580682  |
| S | -17.3449690863 | -2.5671992271 | -3.325070868  | C | 9.6949413494  | -3.0884907885 | 11.3728958697 |
| C | -19.6211834232 | -0.9965171748 | -3.6926411042 | C | 12.9338262886 | -2.2959190374 | 10.2409721539 |
| C | -16.240108985  | -1.9905874683 | -2.0836469371 | C | 12.6562579325 | -0.6081224467 | 7.1261335979  |
| C | -22.0909132931 | 1.6753198192  | -3.1666503764 | C | 7.6140698554  | -1.2170808297 | 7.7373033314  |
| H | -23.0210786401 | 2.2013897359  | -3.3416051448 | C | 7.7996732723  | -3.8804463976 | 10.0607655801 |
| O | -20.0684899189 | -1.8498484101 | -4.6618698528 | C | 11.6967668171 | -4.2114167047 | 11.0439857046 |
| O | -18.2433146638 | 1.5765892893  | -0.6344371199 | C | 13.8638616874 | -2.4886046774 | 8.1174967622  |
| C | -19.6829693274 | -1.4736434285 | -5.9778757551 | C | 11.325195813  | -1.0822066955 | 5.2816444457  |
| H | -20.0898536956 | -2.2343403241 | -6.6470688291 | C | 7.6637818156  | -4.0560636275 | 5.3444421551  |
| H | -20.0940048092 | -0.4919481541 | -6.2454032399 | C | 7.8905882896  | -5.9941484192 | 8.9074378701  |
| H | -18.5908553974 | -1.4460567192 | -6.0786860409 | C | 11.8142056614 | -6.3298621985 | 9.9026939142  |
| C | -17.4306655476 | 2.6501605146  | -1.0928206918 | C | 14.0050913366 | -4.5932111382 | 6.9593483445  |
| H | -17.1667375876 | 3.2350418001  | -0.2095000604 | C | 11.4406440685 | -3.1923533413 | 4.1331781011  |
| H | -16.5167522644 | 2.2774885195  | -1.5726112723 | C | 8.6634219395  | -3.5281045911 | 4.4716251806  |
| H | -17.976035002  | 3.2855287885  | -1.801445434  | C | 7.2371173922  | -5.4097291905 | 7.7800995251  |
| C | -3.3780980847  | 0.2792606524  | 4.5500570068  | C | 10.4053534098 | -6.5007461204 | 10.0729346265 |
| C | -1.4947999462  | -0.6457359953 | 3.5086162024  | C | 13.7920417151 | -5.2822752911 | 8.1918916575  |
| C | -2.9200771626  | -0.5429594269 | 3.4723068312  | C | 12.713279763  | -3.4466288481 | 4.7305193608  |
| C | -0.9589499483  | -1.463167219  | 2.5322735793  | C | 8.5453807246  | -1.417313291  | 5.6171939989  |
| C | -3.5012933487  | -1.2929642568 | 2.4518451858  | C | 7.148395643   | -3.298773658  | 8.9320674259  |
| S | -2.2482082956  | -2.068091676  | 1.5379778299  | C | 10.2901874281 | -4.3819466989 | 11.2092886567 |
| S | -0.7844829581  | 0.2541914288  | 4.8223388127  | C | 13.6510860746 | -3.1748026985 | 9.350207423   |
| F | -4.6635438459  | 0.5274469746  | 4.7517938671  | C | 12.5972121532 | -1.338165866  | 5.8800109006  |
| C | -2.3797160065  | 0.7760188778  | 5.3345925656  | C | 7.5484065388  | -1.9478055703 | 6.4920515082  |
| O | -3.690106178   | 1.9971045368  | 6.8346940433  | C | 8.3012760479  | -5.2038255398 | 10.0087865639 |
| C | -3.7909750612  | 2.8499174342  | 7.9730650812  | C | 12.4548996876 | -5.1204679699 | 10.2617385067 |
| H | -4.8571369993  | 3.0325732163  | 8.1064481413  | C | 13.9104259451 | -3.1827042624 | 6.8830401378  |
| H | -3.3698098263  | 2.3632326429  | 8.8568130638  | C | 10.663761247  | -2.070100818  | 4.5085355853  |
| H | -3.2583956075  | 3.7886570292  | 7.7987695939  | C | 9.2198259349  | -2.2441406145 | 4.6837910256  |
| C | -2.4391437177  | 1.6512534693  | 6.5094611568  | C | 6.9786075281  | -4.0187294085 | 7.7231575514  |
| O | -1.4502465384  | 2.0142873321  | 7.1106527946  | C | 9.6029713403  | -5.4649776405 | 10.6045769307 |

|   |                |               |               |   |               |               |               |
|---|----------------|---------------|---------------|---|---------------|---------------|---------------|
| C | -6.7194517951  | -2.4874574788 | 1.0066204256  | C | 13.4791072    | -4.5794131019 | 9.3813149457  |
| C | -7.2941516218  | -1.2795220809 | 1.4867195725  | C | 13.2456953097 | -2.586982504  | 5.722098939   |
| C | -9.4167764527  | -1.858091083  | 0.5531315332  | C | 7.1927353453  | -3.3169362137 | 6.4562770192  |
| C | -8.8411364573  | -3.0674411024 | 0.0759009528  | C | 10.6257609596 | -0.7606400394 | 12.2500391208 |
| C | -7.5149526703  | -3.4053453011 | 0.3016181421  | C | 9.3375850163  | -0.5816951189 | 13.0213218131 |
| C | -5.3399884074  | -2.5841915378 | 1.3432899452  | C | 11.7461293898 | -0.1102329077 | 13.0748438776 |
| H | -4.7233628967  | -3.4340660953 | 1.0719462793  | C | 8.5675424018  | 0.5704065969  | 12.8502408384 |
| C | -10.7906242722 | -1.7459704444 | 0.1931366143  | C | 8.9640245558  | -1.5063926133 | 13.9985139816 |
| S | -9.9974244831  | -4.0136091734 | -0.8184063755 | H | 11.4016598325 | 0.9160591612  | 13.2659331942 |
| H | -11.4073918472 | -0.8982064675 | 0.4704591361  | H | 11.7115914163 | -0.6095096981 | 14.0537138031 |
| S | -6.1251879703  | -0.303621232  | 2.3270386877  | C | 13.1961062641 | -0.0523965437 | 12.6082314096 |
| C | -8.6292926907  | -0.9577152108 | 1.2875763838  | C | 7.4369349831  | 0.7880698167  | 13.6322145818 |
| C | -4.869904156   | -1.5044337522 | 2.048542126   | H | 8.8514543707  | 1.2984735238  | 12.0940724149 |
| C | -11.2522462121 | -2.8153694364 | -0.5288857948 | C | 7.8337610257  | -1.2907181018 | 14.7816091587 |
| O | -9.1524224875  | 0.2149950809  | 1.7541104134  | H | 9.5590409142  | -2.405317798  | 14.1418681984 |
| O | -6.9866186225  | -4.568264647  | -0.1800441967 | H | 13.6061348932 | -1.053792811  | 12.4539428628 |
| C | -9.6915938024  | 0.1167001041  | 3.0674453627  | H | 13.2857070082 | 0.4702003668  | 11.6524008286 |
| H | -10.064748327  | 1.1107425593  | 3.3215066306  | C | 14.0469881826 | 0.6702166758  | 13.6442677773 |
| H | -10.516912987  | -0.6055834835 | 3.1020615407  | C | 7.0660777243  | -0.1435075729 | 14.5984103286 |
| H | -8.9222053632  | -0.1795706116 | 3.7909368021  | H | 6.8431069327  | 1.6856817662  | 13.4829378056 |
| C | -7.1114389304  | -5.6695126843 | 0.7134866395  | H | 7.5515838915  | -2.0223706604 | 15.5337616392 |
| H | -6.66445924    | -6.5271656005 | 0.2073872881  | H | 13.6803174482 | 1.6898986109  | 13.8246576242 |
| H | -6.5774905847  | -5.4769181383 | 1.6524594157  | H | 14.0047401161 | 0.1683554948  | 14.6203666936 |
| H | -8.164112919   | -5.8844803368 | 0.9337766266  | C | 15.4953391875 | 0.764458562   | 13.2315637933 |
| C | -12.5767141391 | -3.0148178747 | -1.0539038445 | H | 6.1808521568  | 0.0235372495  | 15.2058563638 |
| C | 8.6635991161   | -6.854088158  | 0.431596405   | O | 15.9618983461 | 0.3379386361  | 12.2018833284 |
| C | 10.4152325931  | -5.3013990939 | 0.3031702396  | O | 16.2212077536 | 1.3962641621  | 14.1690701038 |
| C | 9.0037736341   | -5.4650147045 | 0.4552457355  | C | 17.6062005951 | 1.5349637014  | 13.8622862717 |
| C | 8.3278065346   | -4.2636098484 | 0.6521985879  | H | 18.0733117546 | 0.5547448232  | 13.7334988172 |
| S | 9.4643807681   | -2.9585805413 | 0.5825900723  | H | 17.7419950138 | 2.1116656778  | 12.9432553912 |
| S | 11.254440486   | -6.8200683346 | 0.1330289398  | H | 18.0460417246 | 2.0593216529  | 14.7109584602 |
| F | 7.4150034965   | -7.2742628844 | 0.5619276602  |   |               |               |               |

**Table S17.** The coordinate of PTB7Ir/PC<sub>71</sub>BM (311 atoms) calculated by PBE0-D2 functional.

| Atom | Coordinates (Angstroms) |               |               | Atom | Coordinates (Angstroms) |                |               |
|------|-------------------------|---------------|---------------|------|-------------------------|----------------|---------------|
|      | X                       | Y             | Z             |      | X                       | Y              | Z             |
| C    | 23.8716677294           | 1.8630011502  | -0.7617884935 | C    | 9.6984857815            | -7.4616961005  | 0.4092287087  |
| C    | 26.3578573681           | 1.4530499489  | -0.7298438748 | O    | 8.5339273883            | -9.4826842413  | 0.5300985222  |
| C    | 25.0144087941           | 1.0652453032  | -0.5768437375 | C    | 8.531746585             | -10.9084208744 | 0.5163065313  |
| C    | 22.5218091024           | 1.2435736747  | -0.5992696365 | H    | 7.4892157485            | -11.1990676824 | 0.6445546259  |
| C    | 21.4236657661           | 2.0831348641  | -0.376340192  | H    | 8.9227525242            | -11.2844458109 | -0.4329191547 |
| C    | 20.1478295922           | 1.5654336479  | -0.2190657775 | H    | 9.1444405402            | -11.3018386073 | 1.3318453314  |
| C    | 19.9158519789           | 0.1836740349  | -0.2925101205 | C    | 9.7421794864            | -8.926940521   | 0.3865332364  |
| C    | 21.0159345959           | -0.6559438857 | -0.5272063676 | O    | 10.7724051934           | -9.5531301377  | 0.2509669267  |

|    |               |               |               |   |               |               |               |
|----|---------------|---------------|---------------|---|---------------|---------------|---------------|
| C  | 22.2911016847 | -0.1359440488 | -0.6815925529 | C | 5.097771425   | -2.3925399372 | 1.5195599884  |
| H  | 24.843830037  | 0.0384695554  | -0.286092525  | C | 4.4713555662  | -3.5006794435 | 0.887085981   |
| H  | 21.5905601798 | 3.1547571286  | -0.3416558285 | C | 2.3033514926  | -2.6153170385 | 1.366453601   |
| H  | 19.3134000052 | 2.2444021893  | -0.0620661491 | C | 2.9314656684  | -1.5058745846 | 1.9953654015  |
| H  | 20.8691129679 | -1.7310076131 | -0.5747219541 | C | 4.3092741468  | -1.3715298831 | 2.0752851491  |
| H  | 23.110148075  | -0.8177762069 | -0.8882605417 | C | 6.5164508183  | -2.5136588942 | 1.5100027078  |
| C  | 27.4346951599 | 0.4587998738  | -0.4320977287 | H | 7.1764685247  | -1.8013113953 | 1.9926299473  |
| C  | 27.2434072523 | -0.6395723803 | 0.4148476302  | C | 0.8831739062  | -2.5298454793 | 1.4354947738  |
| C  | 28.696401703  | 0.6525056848  | -1.0079664251 | S | 1.7602239336  | -0.3861889088 | 2.6325726579  |
| C  | 28.2818927819 | -1.5305390536 | 0.663651033   | H | 0.225870861   | -3.3046472432 | 1.0560794112  |
| H  | 26.2889875172 | -0.786072153  | 0.9116313477  | S | 5.6393828577  | -4.6491842062 | 0.3021643768  |
| C  | 29.7305838444 | -0.24384271   | -0.7679507313 | C | 3.092187107   | -3.6257549832 | 0.7947830956  |
| H  | 28.8482698121 | 1.5211422046  | -1.6406812271 | C | 6.9644111883  | -3.65445668   | 0.8918013351  |
| C  | 29.526029663  | -1.3405424501 | 0.0669580714  | C | 0.4371067033  | -1.4025761088 | 2.0754528612  |
| H  | 28.120397295  | -2.3722843019 | 1.3317112789  | O | 2.5193703404  | -4.7134146288 | 0.1992389901  |
| H  | 30.7011730774 | -0.0842979898 | -1.2300423692 | O | 4.8735396867  | -0.3021216502 | 2.7082173101  |
| H  | 30.3354726366 | -2.0397715646 | 0.2592213398  | C | 2.2674937927  | -4.5393503748 | -1.1901771237 |
| O  | 23.8517357387 | 3.1079587994  | -1.0245869242 | H | 1.8226308816  | -5.4724612046 | -1.5412820564 |
| O  | 26.7778314219 | 2.5788649843  | -1.1464271687 | H | 1.5689837886  | -3.7111529441 | -1.3642657869 |
| Ir | 25.5645987606 | 4.3261593494  | -1.5196410891 | H | 3.1970014745  | -4.3486449819 | -1.7405641116 |
| C  | 27.1900979284 | 5.4213360907  | -1.8267868749 | C | 5.2300174508  | 0.7630063044  | 1.8345532302  |
| C  | 27.7954859583 | 5.7097144903  | -3.0529591808 | H | 5.6607181271  | 1.5442348416  | 2.4635874449  |
| C  | 27.7924845729 | 5.9161801407  | -0.6351823769 | H | 5.9715145987  | 0.4372845783  | 1.0943763041  |
| C  | 28.9659371003 | 6.4500674916  | -3.0862806718 | H | 4.3491834884  | 1.1575002349  | 1.3132583287  |
| H  | 27.3715377809 | 5.3659339025  | -3.9905445916 | C | 16.74088681   | -1.8196165746 | -0.3026215435 |
| C  | 28.9747797618 | 6.6564309789  | -0.7333208167 | C | 16.1651026278 | -0.7424871283 | 0.4235138526  |
| C  | 29.5836702032 | 6.936933243   | -1.9411069075 | C | 14.0425019514 | -1.8391073988 | 0.4728378611  |
| H  | 30.4987047847 | 7.5144208863  | -1.987586368  | C | 14.6204409173 | -2.9187305737 | -0.2478374538 |
| C  | 27.0882692194 | 5.6038746578  | 0.5998598452  | C | 15.9537578845 | -2.933079499  | -0.6322851655 |
| C  | 27.4449426632 | 5.9815290985  | 1.9007725967  | C | 18.1134800348 | -1.5754802221 | -0.6120720271 |
| C  | 26.6409816872 | 5.6206233031  | 2.9700207452  | H | 18.7100398777 | -2.2554258883 | -1.2093014711 |
| H  | 28.3470720509 | 6.5557645543  | 2.0563355334  | C | 12.6610768636 | -2.0634480271 | 0.7474561038  |
| C  | 25.1745555885 | 4.5333621698  | 1.4389632815  | S | 13.4484353328 | -4.1620421365 | -0.5848283042 |
| C  | 25.4800924557 | 4.8849204499  | 2.7420417936  | H | 12.0435966976 | -1.3668724425 | 1.3035673488  |
| H  | 26.9185818785 | 5.9153293764  | 3.9781143967  | S | 17.3275008112 | 0.5203269989  | 0.7095082997  |
| H  | 24.2879743957 | 3.9653895238  | 1.1792385946  | C | 14.8377070555 | -0.7388360384 | 0.8292492602  |
| H  | 24.8224048504 | 4.5866521023  | 3.551102448   | C | 18.5753185016 | -0.3780700653 | -0.1430680399 |
| C  | 24.3165647468 | 4.6918091403  | -4.1191104243 | C | 12.2000791249 | -3.2574380871 | 0.2614739977  |
| C  | 25.7287961948 | 2.8164346985  | -4.0975910945 | O | 14.3138638831 | 0.3167678696  | 1.5187311757  |
| C  | 23.9739867436 | 4.4160159621  | -5.449084654  | O | 16.4711989867 | -3.9807355432 | -1.3406867032 |
| C  | 25.4264225495 | 2.5030215367  | -5.4110656545 | C | 14.3487279719 | 0.1487983739  | 2.9323042183  |
| H  | 26.419975273  | 2.2308965066  | -3.5014512894 | H | 13.8800205422 | 1.0371363392  | 3.3598467925  |
| C  | 24.528465632  | 3.3214605156  | -6.0927935166 | H | 13.7902216154 | -0.743753115  | 3.2393537866  |
| H  | 23.2783502432 | 5.0649729786  | -5.9616493958 | H | 15.3812250724 | 0.0693578203  | 3.2943861311  |

|   |                |                |               |   |               |               |               |
|---|----------------|----------------|---------------|---|---------------|---------------|---------------|
| H | 25.884613607   | 1.6393556101   | -5.8803608195 | C | 17.0452621611 | -4.9943430929 | -0.5242629424 |
| H | 24.2619147016  | 3.1094000942   | -7.1243502064 | H | 17.4087810598 | -5.7675557846 | -1.2039526281 |
| C | 23.8552348695  | 5.8034964298   | -3.3005404553 | H | 17.8825266788 | -4.599401185  | 0.0650894403  |
| C | 22.9684418535  | 6.8038480938   | -3.7110938801 | H | 16.2997602637 | -5.4269855483 | 0.1541652828  |
| C | 24.3825577785  | 5.8522588809   | -1.9788199526 | C | 10.8641729992 | -3.7861250387 | 0.3607411199  |
| C | 22.5847263959  | 7.8463284685   | -2.8899884977 | C | 9.105325637   | -0.5783593954 | 10.2174200587 |
| C | 24.0061724855  | 6.9094779552   | -1.1459866529 | C | 10.360036043  | -0.7488222927 | 11.000786724  |
| C | 23.1247179249  | 7.8721756705   | -1.610282429  | C | 11.4331231126 | -0.3613242799 | 10.0412961653 |
| H | 21.8968160254  | 8.6083792988   | -3.2349384454 | C | 10.8291707982 | 0.2749108909  | 8.9029649712  |
| H | 24.3874926603  | 6.9991967305   | -0.134301725  | C | 9.6624205026  | -6.5151060032 | 4.7785607773  |
| N | 25.191049658   | 3.8718820414   | -3.4714652929 | C | 9.375593963   | -7.2800187741 | 5.9713901787  |
| N | 25.9524255938  | 4.8774300491   | 0.4037575625  | C | 10.6345961023 | -7.6262208602 | 6.5939654938  |
| F | 22.7698062954  | 8.8766957706   | -0.7988281566 | C | 11.6980712558 | -7.0696474828 | 5.786567696   |
| F | 22.447098562   | 6.7825260861   | -4.9525379434 | C | 11.0966395486 | -6.3855133793 | 4.6644125145  |
| F | 29.5731237102  | 7.1322405464   | 0.3755530535  | C | 9.3994812035  | 0.1436600595  | 9.0135634382  |
| F | 29.5370198856  | 6.714182965    | -4.2685410829 | C | 8.0857466643  | -1.513462255  | 10.2066768024 |
| C | -15.1251107389 | -5.6284425631  | -1.6340250979 | C | 10.5449145591 | -2.2003188503 | 11.6745069315 |
| C | -13.1932732439 | -4.438816682   | -1.047764913  | C | 12.5817885811 | -1.1090450677 | 9.8461028346  |
| C | -14.5447349631 | -4.3269267974  | -1.5002618511 | C | 11.4311860371 | 0.2290360784  | 7.6424389108  |
| C | -14.9701468223 | -3.008240419   | -1.6441343094 | C | 8.8415200386  | -5.4424304532 | 4.4341092404  |
| S | -13.6557418368 | -1.9459769113  | -1.2574316141 | C | 8.281306898   | -6.9428815581 | 6.7642298055  |
| S | -12.6918245558 | -6.0926245711  | -0.8172014598 | C | 10.7444701006 | -7.6211743675 | 7.9814140156  |
| F | -16.3758466092 | -5.8056203351  | -2.0296675619 | C | 12.82557687   | -6.5322886951 | 6.4029711595  |
| C | -14.2780585401 | -6.6500875978  | -1.3215918395 | C | 11.6484485431 | -5.1886141442 | 4.20991852    |
| O | -15.7197797441 | -8.4402305775  | -1.7357048433 | C | 8.6237448934  | -0.0251835322 | 7.8639321839  |
| C | -15.9682293907 | -9.8442636221  | -1.7637131027 | C | 8.2569551365  | -2.8236923933 | 10.8246158898 |
| H | -16.998962482  | -9.9505722307  | -2.1013416281 | C | 11.7584531484 | -2.9517751003 | 11.2629452216 |
| H | -15.282840779  | -10.342124226  | -2.4547955813 | C | 13.1915909405 | -1.1864782115 | 8.5451362459  |
| H | -15.8424892322 | -10.2767547977 | -0.7675570826 | C | 10.6282500975 | 0.0304274555  | 6.4604639033  |
| C | -14.489004802  | -8.1010226555  | -1.3377484735 | C | 7.7168126162  | -5.0922349424 | 5.2647590907  |
| O | -13.6275261062 | -8.8942260559  | -1.0208978101 | C | 8.4037605908  | -6.9305521598 | 8.201436892   |
| C | -17.8996592373 | -0.8072975568  | -2.3148975001 | C | 11.9122909282 | -7.0570273471 | 8.6152232242  |
| C | -18.4056363742 | -1.8575746057  | -3.1264879089 | C | 13.3862073771 | -5.2893012615 | 5.9326534276  |
| C | -20.3557552501 | -0.5801389854  | -3.6532540569 | C | 10.7939146404 | -4.082560626  | 3.8575741442  |
| C | -19.8479025204 | 0.4718489839   | -2.8436563747 | C | 9.4196356845  | -4.2065483126 | 3.9689503498  |
| C | -18.6308756441 | 0.3824354133   | -2.1806410031 | C | 7.440772095   | -5.8265179595 | 6.4053963971  |
| C | -16.6584084319 | -1.1604439344  | -1.7111957064 | C | 9.6086142854  | -7.2662192123 | 8.7980443714  |
| H | -16.133325751  | -0.5135131644  | -1.0169407042 | C | 12.9298365596 | -6.5218153405 | 7.8417178138  |
| C | -21.6327790169 | -0.2459969816  | -4.2157631069 | C | 12.808638266  | -4.632317253  | 4.8591799401  |
| S | -20.9471220884 | 1.8238374944   | -2.7989007657 | C | 9.2539363975  | -0.0944558125 | 6.568569442   |
| H | -22.2023524063 | -0.9194496952  | -4.8453906329 | C | 7.3057768774  | -1.7179222312 | 9.0134836033  |
| S | -17.3475454115 | -3.2384228911  | -3.1229770317 | C | 9.4429162832  | -3.1637160963 | 11.4339529675 |
| C | -19.614626669  | -1.7604154675  | -3.8026360121 | C | 12.7457410769 | -2.4197410967 | 10.4643741446 |
| C | -16.2233369889 | -2.4173785067  | -2.0474935123 | C | 12.6368593182 | -0.5194912428 | 7.463110454   |

|   |                |               |               |   |               |               |               |
|---|----------------|---------------|---------------|---|---------------|---------------|---------------|
| C | -22.053723005  | 0.989690083   | -3.8491336231 | C | 7.5579214417  | -0.9793229452 | 7.866559583   |
| H | -22.9809839336 | 1.4754289288  | -4.1262730516 | C | 7.5684716446  | -3.7956543607 | 10.0096599138 |
| O | -20.0812983216 | -2.7983458926 | -4.5593712963 | C | 11.4142730769 | -4.336349989  | 11.0949817172 |
| O | -18.1762421974 | 1.4025887671  | -1.3942759876 | C | 13.7423768778 | -2.5055591925 | 8.3642842609  |
| C | -19.6999599468 | -2.7251048185 | -5.9273113015 | C | 11.3551228614 | -0.8199777376 | 5.548030778   |
| H | -20.1238784312 | -3.6064368684 | -6.4126909964 | C | 7.5915002097  | -3.6532238487 | 5.2899162414  |
| H | -20.0975104471 | -1.8184618289 | -6.4008169043 | C | 7.6260035522  | -5.8301484409 | 8.7197318811  |
| H | -18.6083504503 | -2.7388041702 | -6.0360302814 | C | 11.4976811246 | -6.3772933162 | 9.8179586442  |
| C | -17.3576219385 | 2.3377268296  | -2.0860919305 | C | 13.8498587853 | -4.5324678727 | 7.0720565103  |
| H | -17.0731005746 | 3.0972855417  | -1.3552635565 | C | 11.4364710975 | -2.8527983039 | 4.2644740623  |
| H | -16.4558518244 | 1.8552647111  | -2.483994104  | C | 8.6391621452  | -3.1060339126 | 4.4880030638  |
| H | -17.906018278  | 2.8111439339  | -2.9097694718 | C | 7.0333824231  | -5.1484792378 | 7.6137479791  |
| C | -3.3443045219  | 0.9897560362  | 4.0764561676  | C | 10.0787080959 | -6.5064183426 | 9.9302430301  |
| C | -1.4612109858  | -0.0634484271 | 3.1625994793  | C | 13.570096914  | -5.2934963284 | 8.2476288963  |
| C | -2.8878230756  | 0.0203206512  | 3.1284692958  | C | 12.6780313696 | -3.1935195415 | 4.8848582715  |
| C | -0.9268579856  | -1.011123404  | 2.3104552189  | C | 8.5558322454  | -1.0730378507 | 5.7696060768  |
| C | -3.4721025503  | -0.8776983211 | 2.2382057236  | C | 6.9777171791  | -3.1167214171 | 8.902056158   |
| S | -2.2215472624  | -1.7686202793 | 1.4335811662  | C | 9.9976636978  | -4.4649144266 | 11.2027771133 |
| S | -0.748053503   | 1.030324666   | 4.3181268006  | C | 13.4628321846 | -3.2636603769 | 9.5403052068  |
| F | -4.6305925782  | 1.2520510865  | 4.2530069196  | C | 12.595448659  | -1.1625394772 | 6.1692448729  |
| C | -2.3436407878  | 1.6080098412  | 4.765927248   | C | 7.5109412969  | -1.623015493  | 6.5733156091  |
| O | -3.6516423428  | 3.0280669594  | 6.0812390867  | C | 8.0246251873  | -5.130532774  | 9.8849505327  |
| C | -3.7502887653  | 4.0414305237  | 7.0796692346  | C | 12.1672058038 | -5.2190061634 | 10.2784356471 |
| H | -4.8167873499  | 4.2347832404  | 7.1938985254  | C | 13.8074226054 | -3.1173946304 | 7.0878626128  |
| H | -3.318192623   | 3.6956692366  | 8.0225241909  | C | 10.6870802925 | -1.7293403388 | 4.6892212911  |
| H | -3.2265898093  | 4.9468756847  | 6.7616660852  | C | 9.232603651   | -1.8607172644 | 4.8046514479  |
| C | -2.4003796686  | 2.6490093306  | 5.7969339815  | C | 6.8252101735  | -3.748258221  | 7.6424913956  |
| O | -1.4093591934  | 3.1073130742  | 6.3250974254  | C | 9.2943010581  | -5.4790915833 | 10.5041351354 |
| C | -6.6925198953  | -2.3188027019 | 1.0462667122  | C | 13.240480893  | -4.6598090111 | 9.4708078995  |
| C | -7.2730068511  | -1.0510872004 | 1.3216523011  | C | 13.2051544402 | -2.421427719  | 5.9489777594  |
| C | -9.3983371085  | -1.7931329732 | 0.518234214   | C | 7.107993705   | -2.9724225139 | 6.4333194938  |
| C | -8.8173590951  | -3.0625671869 | 0.2489332372  | C | 10.4237165298 | -0.9350218768 | 12.4954947459 |
| C | -7.4864566879  | -3.3481343852 | 0.5150688118  | C | 9.1165890813  | -0.7592454123 | 13.2351817631 |
| C | -5.30921782    | -2.3481272314 | 1.3800216723  | C | 11.5364177723 | -0.3804298366 | 13.3971095802 |
| H | -4.687554957   | -3.2271295354 | 1.2497625209  | C | 8.3941971181  | 0.4298125448  | 13.1173637894 |
| C | -10.7761681422 | -1.7530241762 | 0.1567892389  | C | 8.6778032002  | -1.7311948655 | 14.1364450382 |
| S | -9.9728957181  | -4.155189257  | -0.4599741768 | H | 11.2238216854 | 0.6452755971  | 13.6394785798 |
| H | -11.3987521905 | -0.8754642475 | 0.2922306963  | H | 11.4473602591 | -0.9361274763 | 14.3415259218 |
| S | -6.1050634939  | 0.0598307492  | 1.9755049542  | C | 13.0041073275 | -0.3524915972 | 12.9862269521 |
| C | -8.6121179077  | -0.7761665661 | 1.0821335868  | C | 7.2464416487  | 0.6385118991  | 13.8765782885 |
| C | -4.8426264302  | -1.1622756224 | 1.889841622   | H | 8.7296457936  | 1.194567413   | 12.4208688786 |
| C | -11.2346098239 | -2.933246856  | -0.3672865788 | C | 7.5305287147  | -1.5244728426 | 14.8968274086 |
| O | -9.139589092   | 0.4559621986  | 1.3465467081  | H | 9.2353812782  | -2.6593075169 | 14.2379236369 |
| O | -6.9531600043  | -4.5721304052 | 0.2309314779  | H | 13.3801891172 | -1.3578947582 | 12.7807455332 |



|   |                |               |               |   |               |               |               |
|---|----------------|---------------|---------------|---|---------------|---------------|---------------|
| C | -9.6816823093  | 0.5760922099  | 2.656798611   | H | 13.1502169256 | 0.2268724129  | 12.0708982407 |
| H | -10.0596662313 | 1.5968943828  | 2.7403918839  | C | 13.8420656833 | 0.2662392305  | 14.0973372707 |
| H | -10.5040700033 | -0.133938874  | 2.8104106777  | C | 6.8107321041  | -0.3394830944 | 14.7668841965 |
| H | -8.9128824905  | 0.4083565073  | 3.4209650042  | H | 6.6905666506  | 1.565915879   | 13.7691395911 |
| C | -7.0496697797  | -5.5043359207 | 1.3026313777  | H | 7.1975151027  | -2.2924530471 | 15.5896416928 |
| H | -6.6000306689  | -6.4318803254 | 0.94348368    | H | 13.511975774  | 1.2881342234  | 14.3282231277 |
| H | -6.5032669771  | -5.1481135555 | 2.1849124392  | H | 13.7385979995 | -0.2927982332 | 15.0372310933 |
| H | -8.0959137127  | -5.6883089622 | 1.5753849216  | C | 15.3090254708 | 0.3193717045  | 13.7477909767 |
| C | -12.5613417084 | -3.2285018081 | -0.8393340203 | H | 5.9124264404  | -0.1791955152 | 15.356684064  |
| C | 8.6431149375   | -6.6105089764 | 0.5575814829  | O | 15.8008932603 | -0.0760719297 | 12.7174933212 |
| C | 10.4122816303  | -5.0909951617 | 0.3424621756  | O | 16.01977702   | 0.8725513916  | 14.7446648296 |
| C | 9.0006167001   | -5.2257471353 | 0.5168325201  | C | 17.4213750136 | 0.9643020746  | 14.5025454148 |
| C | 8.3462466581   | -4.0049820795 | 0.6713891223  | H | 17.851922204  | -0.0285160802 | 14.3457978567 |
| S | 9.5049005722   | -2.7232630937 | 0.5412552994  | H | 17.6212711669 | 1.5767850079  | 13.6190708202 |
| S | 11.2307544052  | -6.6256395589 | 0.2251975502  | H | 17.8455964804 | 1.4284597446  | 15.3931984843 |
| F | 7.392209387    | -7.0108882814 | 0.7235608712  |   |               |               |               |

**Table S18.** The coordinate of 1/PC<sub>71</sub>BM (353 atoms).

| Atom | Coordinates (Angstroms) |               |               | Atom | Coordinates (Angstroms) |               |               |
|------|-------------------------|---------------|---------------|------|-------------------------|---------------|---------------|
|      | X                       | Y             | Z             |      | X                       | Y             | Z             |
| C    | 19.7695705274           | -2.2590432876 | 0.6954624697  | H    | -29.012437167           | -1.6216282293 | 3.6891482585  |
| C    | 22.0345550562           | -1.2229330824 | 1.0664714581  | C    | -28.0210067606          | 3.2061619151  | -0.6011132259 |
| C    | 20.6404933399           | -1.1718272113 | 0.8809511892  | H    | -27.7615266963          | 4.0251660891  | -1.2748263659 |
| C    | 18.315476251            | -1.9942559976 | 0.48136371    | H    | -27.2218869063          | 2.454413951   | -0.6131407672 |
| C    | 17.4066311603           | -3.0260795214 | 0.7449512164  | H    | -28.9574143002          | 2.7416451191  | -0.9341575084 |
| C    | 16.0444109603           | -2.8374685138 | 0.5751619107  | C    | -14.4779560804          | -0.712622044  | 2.9575931125  |
| C    | 15.5361582733           | -1.6108182756 | 0.121609377   | S    | -15.002328449           | 1.2073112889  | 1.3360346183  |
| C    | 16.4496683771           | -0.581326754  | -0.1542575933 | C    | -15.8559512543          | -0.4651692743 | 3.0910323468  |
| C    | 17.8116779503           | -0.7716454255 | 0.0188643027  | H    | -13.948810517           | -1.47691176   | 3.5171009958  |
| H    | 20.1858627481           | -0.191638186  | 0.920556234   | C    | -16.312273443           | 0.5547649655  | 2.2767065785  |
| H    | 17.7933777174           | -3.9814255206 | 1.084209246   | H    | -16.5005573743          | -1.0122545408 | 3.7710637155  |
| H    | 15.3634581492           | -3.6598710749 | 0.7796301914  | C    | -20.1567475121          | 1.4455868402  | 2.4487511075  |
| H    | 16.0838206014           | 0.3846209029  | -0.4900371403 | C    | -21.5099300755          | 1.2857356559  | 2.9092342507  |
| H    | 18.4888362816           | 0.0412526195  | -0.2249711096 | C    | -21.915487181           | 0.5971281388  | 4.040163923   |
| C    | 22.8000565306           | 0.0582556744  | 1.1618198201  | S    | -22.8963003811          | 1.8764600626  | 2.0399558412  |
| C    | 22.3226224718           | 1.2710736333  | 0.6507061289  | C    | -23.3103847022          | 0.5549543398  | 4.2048083543  |
| C    | 24.0601346408           | 0.0353911331  | 1.7727117211  | H    | -21.2139509162          | 0.1629177927  | 4.7448129557  |
| C    | 23.0770169514           | 2.4337018973  | 0.7652289464  | C    | -23.9980226159          | 1.2132980722  | 3.2043876351  |
| H    | 21.3692531906           | 1.306212486   | 0.1323603479  | H    | -23.8032156793          | 0.0845695951  | 5.0490820876  |
| C    | 24.8100721349           | 1.1986964776  | 1.8947606682  | C    | -25.4209696956          | 1.3954297166  | 3.0678394423  |
| H    | 24.4381345807           | -0.9122350986 | 2.1430588955  | C    | -17.6459562586          | 1.069879164   | 2.1580811658  |
| C    | 24.3195264374           | 2.4029237575  | 1.3939886063  | C    | -18.1375902842          | 2.1532002662  | 1.4547877494  |
| H    | 22.6959642175           | 3.365399842   | 0.3558375711  | C    | -13.8536271159          | 0.1118335699  | 2.0430508658  |
| H    | 25.782333503            | 1.1657678178  | 2.3791476762  | C    | -39.8122312687          | 0.3077303844  | 4.8655892411  |

|    |               |               |               |   |                |               |              |
|----|---------------|---------------|---------------|---|----------------|---------------|--------------|
| H  | 24.9068260693 | 3.3127336661  | 1.4856163689  | C | -39.4246290634 | 1.4098403106  | 4.0406946465 |
| O  | 20.0841772853 | -3.4924811216 | 0.6901684453  | S | -38.8809978844 | 3.3877367082  | 2.5187614173 |
| O  | 22.7407576978 | -2.271412955  | 1.2032096451  | S | -37.2193630088 | 0.10256928    | 4.7017255372 |
| Ir | 22.0205266882 | -4.3073722769 | 1.1838866165  | F | -41.0779481466 | 0.0719381936  | 5.1785980531 |
| C  | 23.8575424508 | -4.9945969545 | 1.4847082296  | C | -38.7717384076 | -0.4622665306 | 5.2945687771 |
| C  | 24.4477743477 | -5.3242679288 | 2.7078878243  | O | -39.9771630023 | -2.012592496  | 6.558275994  |
| C  | 24.6362735937 | -5.1112584939 | 0.2981086584  | C | -40.0067673266 | -3.170915157  | 7.389770993  |
| C  | 25.7688575944 | -5.7395243549 | 2.7459553747  | H | -41.0577322249 | -3.3293078829 | 7.6309001902 |
| H  | 23.8953305643 | -5.2634452494 | 3.639619563   | H | -39.5989093744 | -4.0354359783 | 6.8593073317 |
| C  | 25.9650536862 | -5.5342224548 | 0.4010201835  | H | -39.4230878181 | -3.0061810896 | 8.2993647418 |
| C  | 26.5573588193 | -5.8526364746 | 1.6077055073  | C | -38.7555968558 | -1.6540013051 | 6.1477513718 |
| H  | 27.5886947907 | -6.1794389832 | 1.657721162   | O | -37.7344379546 | -2.2397947316 | 6.4407638887 |
| C  | 23.9447124539 | -4.7842718754 | -0.9403797019 | C | -47.2009283119 | 2.8593895406  | 5.2200870698 |
| C  | 24.4593704567 | -4.8372882305 | -2.2418917909 | C | -47.688237139  | 3.8101270681  | 4.2835922465 |
| C  | 23.647239956  | -4.5210558894 | -3.3191765318 | C | -49.8922747595 | 3.6641249065  | 5.1956251442 |
| H  | 25.4888720615 | -5.1294392702 | -2.3921774352 | C | -49.4045252172 | 2.7182730966  | 6.1362048247 |
| C  | 21.8621292495 | -4.113344305  | -1.794257938  | C | -48.0752106453 | 2.3146305611  | 6.1708558264 |
| C  | 22.3211857376 | -4.1549429494 | -3.099226036  | C | -45.8143913662 | 2.5829402595  | 5.0228738154 |
| H  | 24.0477030145 | -4.5642581243 | -4.3281189334 | H | -45.2682316908 | 1.8531858753  | 5.6109331698 |
| H  | 20.8429043517 | -3.8440419076 | -1.5385032132 | C | -51.299118822  | 3.8953075863  | 5.3582979483 |
| H  | 21.6523438151 | -3.9066224672 | -3.9159874398 | S | -50.6775300374 | 2.1492578407  | 7.1814653925 |
| C  | 20.7477082641 | -5.4071346143 | 3.5555013743  | H | -51.8725322273 | 4.5629032982  | 4.7257792323 |
| C  | 21.6396336302 | -3.276048097  | 3.9707714822  | S | -46.4303532524 | 4.3425422977  | 3.2025776368 |
| C  | 20.2634445187 | -5.4581166049 | 4.8690093298  | C | -49.0107467538 | 4.2285671159  | 4.2620933098 |
| C  | 21.1867955965 | -3.2789607378 | 5.2783300667  | C | -51.8311804892 | 3.1656723863  | 6.37002637   |
| H  | 22.1988798072 | -2.4481517451 | 3.5499961539  | O | -49.4417425516 | 5.1329463118  | 3.3318364631 |
| C  | 20.4820913674 | -4.3932819485 | 5.7281256751  | O | -47.6451269878 | 1.3876213378  | 7.0775223668 |
| H  | 19.7252202173 | -6.3346049883 | 5.2004254132  | C | -49.4463863058 | 6.4754196282  | 3.799703351  |
| H  | 21.3830621666 | -2.4272664051 | 5.9202849714  | H | -49.8049667218 | 7.0892089321  | 2.9708942362 |
| H  | 20.1065705733 | -4.4348642792 | 6.7466344382  | H | -50.117048128  | 6.5936782905  | 4.6601187326 |
| C  | 20.6405698906 | -6.4397029706 | 2.5350116266  | H | -48.4373461698 | 6.7993175603  | 4.0837341104 |
| C  | 20.0149690266 | -7.6804848755 | 2.6949700459  | C | -47.1245439505 | 1.9546154823  | 8.2733618833 |
| C  | 21.2544150483 | -6.1346751097 | 1.2867175015  | H | -46.8285447058 | 1.1166849334  | 8.9076279783 |
| C  | 19.9739037734 | -8.6318763258 | 1.6946127012  | H | -46.2497744241 | 2.5836903027  | 8.0655169083 |
| C  | 21.2258955831 | -7.0973908057 | 0.2738344606  | H | -47.8840839967 | 2.5536818205  | 8.7907996875 |
| C  | 20.593387942  | -8.3100625079 | 0.4932794633  | C | -34.399537214  | 3.6862386982  | 1.4846697106 |
| H  | 19.4839146508 | -9.5856603077 | 1.8468156559  | S | -34.8231333142 | 1.9097076517  | 3.2888809113 |
| H  | 21.6866129671 | -6.92029955   | -0.6922550825 | C | -35.7949503891 | 3.641559584   | 1.6572272595 |
| N  | 21.4239992274 | -4.3011467354 | 3.1352452986  | H | -33.9031349365 | 4.3472079863  | 0.781831538  |
| N  | 22.6478429411 | -4.412749231  | -0.7511196497 | C | -36.201507061  | 2.7221018102  | 2.6063079605 |
| F  | 20.5701551247 | -9.2203079121 | -0.4884959367 | H | -36.4892404011 | 4.2574337894  | 1.0951845513 |
| F  | 19.4171258682 | -7.9950949346 | 3.8602534156  | C | -40.0710917407 | 2.4298346938  | 3.3448045387 |
| F  | 26.7296764419 | -5.647828587  | -0.7020183332 | C | -41.4547716677 | 2.7997607202  | 3.2107127433 |
| F  | 26.321885274  | -6.0476442393 | 3.9261726749  | C | -42.0106257796 | 3.5488254716  | 2.1876439862 |

|   |                |               |               |   |                |               |               |
|---|----------------|---------------|---------------|---|----------------|---------------|---------------|
| C | -0.3753009064  | -2.6943835579 | 0.4750158523  | S | -42.665076299  | 2.4242750232  | 4.4023970917  |
| C | 0.0617656343   | -1.4864753784 | -0.1536671598 | C | -43.3822226111 | 3.8055186578  | 2.3579744188  |
| S | 0.6956845622   | 0.6812074475  | -1.346105207  | H | -41.440897489  | 3.8746840005  | 1.323660412   |
| S | 2.2255872156   | -2.8515947441 | 0.5240962891  | C | -43.9008481533 | 3.2555582783  | 3.5133520927  |
| F | -1.6586603567  | -2.9809494852 | 0.6349340574  | H | -43.9860950211 | 4.3520134226  | 1.6413114401  |
| C | 0.6390581748   | -3.5052823982 | 0.8920034764  | C | -45.2602022257 | 3.291672633   | 3.992444278   |
| O | -0.639798237   | -5.2140340758 | 1.840932105   | C | -37.5349294871 | 2.414372772   | 3.0373116708  |
| C | -0.7183070487  | -6.4578144394 | 2.534663067   | C | -38.0073525832 | 1.4103663981  | 3.8609631918  |
| H | -1.7831140007  | -6.6575706226 | 2.6529298707  | C | -33.7134535903 | 2.802602348   | 2.2933931555  |
| H | -0.2377436884  | -7.25138716   | 1.9565121975  | H | -52.8646405336 | 3.1483887115  | 6.6928015715  |
| H | -0.2311092182  | -6.3832490269 | 3.5106357822  | C | -3.9239108233  | 1.964622669   | 10.1081554253 |
| C | 0.6054245076   | -4.7935035333 | 1.5902594314  | C | -2.957449608   | 1.6221006325  | 11.1878635734 |
| O | 1.6089888607   | -5.3984302849 | 1.9042506972  | C | -1.6679273184  | 2.1923303604  | 10.7037737052 |
| C | -7.7620016423  | -0.0908009302 | 0.7316491801  | C | -1.9340164901  | 3.0584209801  | 9.5878596379  |
| C | -8.2102907769  | 0.8939812913  | -0.1892072301 | C | -1.4148262167  | -2.7060612021 | 4.0245682589  |
| C | -10.4565536637 | 0.6944451794  | 0.6021819575  | C | -2.0051235837  | -3.7015078161 | 4.8901674504  |
| C | -10.0061695395 | -0.2849373373 | 1.5278290222  | C | -0.9760294782  | -4.1822733735 | 5.7862238972  |
| C | -8.6800331874  | -0.6806908422 | 1.6153210437  | C | 0.2494399431   | -3.4788461168 | 5.4743468505  |
| C | -6.3652638515  | -0.3446392584 | 0.5990006793  | C | -0.0229293943  | -2.5683453533 | 4.384462502   |
| H | -5.8405979646  | -1.0861334138 | 1.1921466208  | C | -3.3207148623  | 2.920280228   | 9.2250360958  |
| C | -11.8623766154 | 0.9126265402  | 0.7039751773  | C | -4.8385847114  | 1.0615242341  | 9.5957174471  |
| S | -11.3171576075 | -0.8992560347 | 2.4953738243  | C | -2.9035621148  | 0.0604954913  | 11.5776931948 |
| H | -12.401834602  | 1.5999602638  | 0.0609921145  | C | -0.4743144608  | 1.4920808571  | 10.7238750507 |
| S | -6.9038386351  | 1.4809804748  | -1.1800671096 | C | -0.9775513537  | 3.2712230375  | 8.5917431651  |
| C | -9.5337780801  | 1.3031805819  | -0.2633322169 | C | -2.1508447776  | -1.577970157  | 3.6672532915  |
| C | -12.4637868206 | 0.1473497551  | 1.6668366683  | C | -3.3053984484  | -3.5288614851 | 5.3587045539  |
| O | -9.9265307811  | 2.2408096582  | -1.1758189505 | C | -1.2919669873  | -4.4689396126 | 7.1115067979  |
| O | -8.2947769448  | -1.6397907659 | 2.5072626807  | C | 1.1042994503   | -3.091434106  | 6.5028547004  |
| C | -9.9740783526  | 3.563754872   | -0.6547468733 | C | 0.5725782938   | -1.3078439851 | 4.3729579091  |
| H | -10.2990223871 | 4.2059164277  | -1.4756587039 | C | -3.7009563903  | 3.0026342279  | 7.8828992778  |
| H | -10.689495753  | 3.6385172976  | 0.1736403719  | C | -4.7893500388  | -0.350753236  | 9.9586817731  |
| H | -8.9851627639  | 3.8867675219  | -0.3066089212 | C | -1.5820440458  | -0.5992546451 | 11.4178162757 |
| C | -7.7661902231  | -1.1173548343 | 3.7211105258  | C | 0.5038257313   | 1.683057433   | 9.6860665002  |
| H | -7.4889391284  | -1.9778406559 | 4.3326288852  | C | -1.3722098458  | 3.3317137527  | 7.2055064115  |
| H | -6.8778535155  | -0.5010188079 | 3.5355361197  | C | -3.4922833618  | -1.3998814288 | 4.1633225107  |
| H | -8.515875937   | -0.5170898388 | 4.2514150694  | C | -3.6248394594  | -3.8188980796 | 6.7350714326  |
| C | 12.0596926814  | -0.5477037579 | -0.8202130259 | C | -0.4040977129  | -4.0604112935 | 8.173606773   |
| C | 11.6086788438  | -1.5487558255 | 0.0807497834  | C | 1.7101246939   | -1.7823541121 | 6.4888187892  |
| C | 9.325578751    | -0.9946714662 | -0.3587286072 | C | -0.1962250052  | -0.1447277988 | 4.0062761137  |
| C | 9.776758974    | 0.0014942438  | -1.2661646074 | C | -1.5299145546  | -0.27689234   | 3.6598768637  |
| C | 11.1218074936  | 0.2295552485  | -1.5174484468 | C | -4.0587066012  | -2.3546257036 | 4.9917260751  |
| C | 13.4855293029  | -0.4911469457 | -0.8775363906 | C | -2.6397664867  | -4.2824551778 | 7.5930525495  |
| H | 14.020736603   | 0.2022077345  | -1.515986183  | C | 0.767283171    | -3.3829033547 | 7.8749340179  |
| C | 7.9022502292   | -1.0214246255 | -0.2635502781 | C | 1.4483958224   | -0.910070567  | 5.4464131692  |

|   |                |               |               |   |               |               |               |
|---|----------------|---------------|---------------|---|---------------|---------------|---------------|
| S | 8.4408942343   | 0.8656483957  | -1.9765410286 | C | -2.705453324  | 3.200385117   | 6.8582503656  |
| H | 7.3680905916   | -1.6895610409 | 0.4035544189  | C | -5.2076981125 | 1.1183347683  | 8.2052582983  |
| S | 12.9440603572  | -2.3751939424 | 0.8290304287  | C | -3.824905211  | -0.8211928584 | 10.8204668474 |
| C | 10.2621566987  | -1.7917368779 | 0.3161537596  | C | -0.4313360851 | 0.0795501854  | 11.0849291045 |
| C | 14.1021153715  | -1.4013710484 | -0.0660895094 | C | 0.2659596997  | 2.5662480929  | 8.644164555   |
| O | 9.8655786187   | -2.7506200684 | 1.2045548454  | C | -4.6624053204 | 2.0784520983  | 7.3651118241  |
| O | 11.522543118   | 1.2040429834  | -2.3890921254 | C | -5.1420449249 | -1.1244289235 | 8.7927307909  |
| C | 9.60673694     | -4.014491902  | 0.6053077543  | C | -1.780815443  | -1.9140504302 | 10.8745778545 |
| H | 9.3059627972   | -4.6827441717 | 1.4144751561  | C | 1.1571724864  | 0.4265191709  | 9.4212177138  |
| H | 8.7972554782   | -3.944858435  | -0.1320812563 | C | -0.3566717101 | 2.6853563993  | 6.4087230537  |
| H | 10.5056677913  | -4.4116271422 | 0.1177042777  | C | -3.6996685838 | 0.0036485042  | 4.4379346715  |
| C | 11.67561371    | 0.7427988053  | -3.7254155209 | C | -4.5824173005 | -2.84435133   | 7.2005104658  |
| H | 11.9886874403  | 1.6064764423  | -4.3156884468 | C | -1.2007359346 | -3.6437253378 | 9.3016041271  |
| H | 12.4408554026  | -0.0412873044 | -3.7877963929 | C | 1.7644126616  | -1.2851005653 | 7.8436167247  |
| H | 10.7292446251  | 0.3541067855  | -4.1215699816 | C | 0.2230966091  | 0.9665322894  | 4.8303273228  |
| C | 7.2853566775   | -0.0986336311 | -1.0635605503 | C | -2.4911011502 | 0.6980043196  | 4.1243508913  |
| C | 5.8746407333   | 0.1495051104  | -1.2176157421 | C | -4.8501603555 | -1.9411264001 | 6.1269226466  |
| C | 5.2451120155   | 1.1614794504  | -1.913845943  | C | -2.5776687145 | -3.781137629  | 8.9437963067  |
| S | 4.7000363129   | -0.8989028972 | -0.4831116682 | C | 1.1855592206  | -2.2728226473 | 8.6971700271  |
| C | 3.8408684563   | 1.0951785902  | -1.8579180805 | C | 1.2350671585  | 0.4926596751  | 5.7199967528  |
| H | 5.7887368396   | 1.9344380576  | -2.4470138515 | C | -3.0721478909 | 2.4158732971  | 5.703752461   |
| C | 3.3706803485   | 0.0287795774  | -1.1141526372 | C | -5.4073339421 | -0.2230228754 | 7.7184118539  |
| H | 3.1865430383   | 1.8052533508  | -2.3528349765 | C | -3.1541093663 | -2.0502405639 | 10.513896472  |
| C | -0.5416729649  | -0.3862758078 | -0.7594656534 | C | 0.5785313719  | -0.5583556998 | 10.2760743241 |
| C | -1.9161881612  | -0.0082366261 | -0.9535399991 | C | 0.6535996303  | 2.2089431083  | 7.2984192449  |
| C | -2.4075943828  | 0.8411435058  | -1.9301010736 | C | -4.2796981067 | 1.7205370958  | 6.0178978531  |
| S | -3.1986196039  | -0.5019704006 | 0.1120715488  | C | -4.5951144821 | -2.4076764803 | 8.5477033757  |
| C | -3.7888758327  | 1.0799764069  | -1.824976428  | C | -0.7677182101 | -2.6132754138 | 10.1690735183 |
| H | -1.7834468132  | 1.2533018845  | -2.7160834491 | C | 1.6394521588  | 0.0957078556  | 8.1305829857  |
| C | -4.3784940786  | 0.41744509    | -0.7661094141 | C | -0.6811003363 | 1.9825409599  | 5.2211153914  |
| H | -4.3470033397  | 1.6999071765  | -2.5186443571 | C | -2.0923177739 | 1.8425217573  | 4.8547280275  |
| C | -5.7638858244  | 0.4133601435  | -0.3694775521 | C | -5.1353697003 | -0.5754934909 | 6.3724960188  |
| C | 2.0110425998   | -0.3424269685 | -0.8451670222 | C | -3.5551848443 | -2.8898728531 | 9.4438638158  |
| C | 1.4888383894   | -1.4509895307 | -0.2060814429 | C | 0.4663145369  | -1.9070238147 | 9.86129381    |
| C | -19.9362415458 | 3.5385719202  | 0.882399253   | C | 1.3718577025  | 1.0202801414  | 7.0268085141  |
| C | -19.5410238964 | 2.3721985306  | 1.6091126185  | C | -4.5440542965 | 0.4339864335  | 5.4908679931  |
| S | -18.9677952246 | 0.2998666556  | 2.987472224   | C | -3.3391902347 | 1.1264840559  | 12.5595155465 |
| S | -17.3758278351 | 3.3453162554  | 0.4365037596  | C | -4.8165269108 | 1.1551386098  | 12.8805276386 |
| F | -21.1890007979 | 3.9703646854  | 0.8687355377  | C | -2.5836777226 | 1.4653958673  | 13.8529984726 |
| C | -18.918393075  | 4.1519858268  | 0.2134204521  | C | -5.5345510737 | 2.3490538864  | 12.7878724667 |
| O | -20.1323816914 | 5.8976763421  | -0.7525902994 | C | -5.4526074375 | 0.0205695906  | 13.3879373579 |
| C | -20.1763469664 | 7.0660193823  | -1.5691359313 | H | -3.0236172273 | 2.410349051   | 14.2023254296 |
| H | -21.2178235404 | 7.387084659   | -1.5620079668 | H | -2.9097334356 | 0.7118011888  | 14.584113229  |
| H | -19.5301383548 | 7.8464761664  | -1.1586596561 | C | -1.0658410693 | 1.587606586   | 13.9231221479 |

|   |                |               |               |   |               |               |               |
|---|----------------|---------------|---------------|---|---------------|---------------|---------------|
| H | -19.8506880477 | 6.8362454133  | -2.5871614925 | C | -6.8681286924 | 2.4051579955  | 13.1824078534 |
| C | -18.9187866441 | 5.3470585071  | -0.635126125  | H | -5.0467218346 | 3.2393978395  | 12.3983038682 |
| O | -17.9167238388 | 5.7772424828  | -1.1666597382 | C | -6.7860709891 | 0.0745197529  | 13.7834077891 |
| C | -27.5107964935 | 2.1621567717  | 2.3582509691  | H | -4.9010096461 | -0.9132365866 | 13.4672586828 |
| C | -27.8969231575 | 1.2392928802  | 3.3672387511  | H | -0.5751107721 | 0.654403206   | 13.6357117026 |
| C | -30.2074355441 | 1.7447126541  | 3.0266140475  | H | -0.6969179038 | 2.3560567348  | 13.2388248204 |
| C | -29.8220914174 | 2.6633466154  | 2.0133437861  | C | -0.6403122161 | 1.9484179998  | 15.3403202216 |
| C | -28.4977870614 | 2.8767104529  | 1.6605611306  | C | -7.4977154831 | 1.2668696436  | 13.6793069421 |
| C | -26.0933207875 | 2.2306052577  | 2.2165328949  | H | -7.4160256481 | 3.3397429841  | 13.0987434867 |
| H | -25.5994566746 | 2.9091311866  | 1.5292282443  | H | -7.2697212213 | -0.8179377497 | 14.1710649834 |
| C | -31.6211549309 | 1.7203664866  | 3.2111842253  | H | -1.0921280126 | 2.8944770454  | 15.6674643736 |
| S | -31.2055054697 | 3.462670339   | 1.3194678097  | H | -0.981094778  | 1.1964600501  | 16.0650839103 |
| H | -32.1083873807 | 1.1034701552  | 3.9587188791  | C | 0.8574352039  | 2.0753976167  | 15.4741356372 |
| S | -26.5123455396 | 0.4766376983  | 4.0971583752  | H | -8.5398140768 | 1.3087161109  | 13.9839638598 |
| C | -29.2226333205 | 1.0093656978  | 3.7047993683  | O | 1.6594452868  | 1.8953260515  | 14.588642876  |
| C | -32.2942910779 | 2.5719537573  | 2.3771545184  | O | 1.199592324   | 2.4191314615  | 16.726825185  |
| O | -29.5504200356 | 0.1255741528  | 4.6932010926  | C | 2.600705915   | 2.5591544007  | 16.9488329612 |
| O | -28.1657850221 | 3.7812457318  | 0.6918203737  | H | 3.1194508732  | 1.6178566537  | 16.7477072177 |
| C | -29.8659594932 | -1.1771762307 | 4.2159104536  | H | 3.0184551455  | 3.3351497539  | 16.3016391372 |
| H | -30.1040189318 | -1.7775681099 | 5.0960239006  | H | 2.7075043237  | 2.8377365665  | 17.9974556526 |
| H | -30.7322589539 | -1.1541797198 | 3.5431296293  |   |               |               |               |

**Table S19.** The coordinate of 2/PC<sub>71</sub>BM (353 atoms).

| Atom | Coordinates (Angstroms) |               |               | Atom | Coordinates (Angstroms) |               |               |
|------|-------------------------|---------------|---------------|------|-------------------------|---------------|---------------|
|      | X                       | Y             | Z             |      | X                       | Y             | Z             |
| C    | 19.2909724002           | -3.1269953934 | 0.7414834218  | H    | -29.2229814268          | 4.3535511579  | -2.6103629904 |
| C    | 21.67950675             | -2.4166984353 | 1.1096595924  | C    | -14.9865417302          | -1.6486276105 | -0.2635523508 |
| C    | 20.3010346036           | -2.175801984  | 0.9662450014  | S    | -15.4405940978          | 0.8459746254  | -0.5272317895 |
| C    | 17.8680409567           | -2.6756063965 | 0.6615610672  | C    | -16.3862835008          | -1.5108403601 | -0.2941134811 |
| C    | 16.9268720656           | -3.5480533645 | 0.1011267446  | C    | -16.8232811238          | -0.2133426864 | -0.4322934146 |
| C    | 15.5938663935           | -3.1866874471 | -0.0104227403 | C    | -20.7116980177          | 0.4476934145  | -0.5253952954 |
| C    | 15.1440670771           | -1.9397680257 | 0.4484387472  | C    | -22.1037808116          | 0.0990600134  | -0.5030036042 |
| C    | 16.0818915107           | -1.0776247404 | 1.0377325106  | C    | -22.635631458           | -1.1718396704 | -0.4206206084 |
| C    | 17.4169942519           | -1.4367879073 | 1.13666583    | S    | -23.4207498397          | 1.2468851613  | -0.5650513548 |
| H    | 19.9855461098           | -1.1455194408 | 1.0468669434  | C    | -24.0396234632          | -1.2227540009 | -0.4084162426 |
| H    | 17.2656059869           | -4.5180782956 | -0.2474585527 | C    | -24.6418745562          | 0.0095960627  | -0.4806051744 |
| H    | 14.8921509779           | -3.8737226156 | -0.4767957696 | C    | -26.0422423611          | 0.3343365998  | -0.4918352566 |
| H    | 15.7511190163           | -0.1290765765 | 1.4507480852  | C    | -18.1691539874          | 0.2710854672  | -0.4880994424 |
| H    | 18.1026094245           | -0.7541368238 | 1.6287798885  | C    | -18.6368980228          | 1.5677456096  | -0.5949632581 |
| C    | 22.5998084857           | -1.2549438597 | 1.3117071306  | C    | -14.3007600478          | -0.4627612597 | -0.3788389303 |
| C    | 22.2769736507           | 0.0506178672  | 0.9222295897  | C    | -40.4824731312          | -0.5149189964 | 0.0875459971  |
| C    | 23.8503551966           | -1.4922075331 | 1.895684803   | C    | -40.0315663507          | 0.8402525614  | 0.0102994176  |
| C    | 23.1739377267           | 1.0931374657  | 1.1290237814  | S    | -39.3472160258          | 3.3085027427  | -0.1348575183 |
| H    | 21.3339426385           | 0.2548001674  | 0.4241728729  | S    | -37.891787947           | -0.7203825459 | -0.0278552279 |

|    |               |                |               |   |                |               |               |
|----|---------------|----------------|---------------|---|----------------|---------------|---------------|
| C  | 24.7420038107 | -0.4488054717  | 2.1119569723  | F | -41.7676158814 | -0.83479201   | 0.1612195255  |
| H  | 24.108253895  | -2.5101789221  | 2.1696956367  | C | -39.4838520262 | -1.4434799796 | 0.07780519    |
| C  | 24.4055712914 | 0.8487985067   | 1.7317941926  | O | -40.7867901651 | -3.3775932197 | 0.2159657604  |
| H  | 22.9122289204 | 2.0990124565   | 0.8117872759  | C | -40.8819050669 | -4.8000770245 | 0.2726422762  |
| H  | 25.7047189914 | -0.6488574426  | 2.5747416846  | H | -41.9481011432 | -5.0182913797 | 0.3294460964  |
| H  | 25.1037121937 | 1.6652651579   | 1.8961993802  | H | -40.4436552574 | -5.2500498925 | -0.6220139124 |
| O  | 19.4565111596 | -4.3743837855  | 0.5524053029  | H | -40.3619533015 | -5.184879295  | 1.1538912894  |
| O  | 22.2511929274 | -3.5526282252  | 1.1271904228  | C | -39.5376338231 | -2.9074769693 | 0.1370698559  |
| Ir | 21.3171338465 | -5.4540038508  | 0.7079745645  | O | -38.5427052911 | -3.6010381993 | 0.1148429872  |
| C  | 23.0802360764 | -6.3629463933  | 0.7292935097  | C | -47.9571538704 | 1.4522547419  | 0.523251925   |
| C  | 23.6796313389 | -7.0190320883  | 1.8079733641  | C | -48.3938913917 | 2.7982505641  | 0.4003550617  |
| C  | 23.7930293618 | -6.2804284684  | -0.5006841052 | C | -50.6813017113 | 2.1258292264  | 0.5655018739  |
| C  | 24.9484466081 | -7.5573814832  | 1.6682208101  | C | -50.2442669045 | 0.7796477221  | 0.6927256014  |
| H  | 23.1750560643 | -7.1195145588  | 2.7631591957  | C | -48.9005369187 | 0.4271389234  | 0.6853622134  |
| C  | 25.0713978934 | -6.8418890551  | -0.5793308897 | C | -46.5371385742 | 1.3492253422  | 0.4528316248  |
| C  | 25.6737227316 | -7.4829627532  | 0.485698622   | H | -46.012207756  | 0.4012995357  | 0.5060699971  |
| H  | 26.6647313911 | -7.9104721156  | 0.3958847084  | C | -52.1127300656 | 2.2223464821  | 0.5871424474  |
| C  | 23.092157137  | -5.6134714779  | -1.5882092377 | S | -51.5944571966 | -0.3136553173 | 0.8326821628  |
| C  | 23.5477056138 | -5.4160606428  | -2.898177637  | H | -52.6497153842 | 3.1576382365  | 0.480793285   |
| C  | 22.7353707783 | -4.7815534761  | -3.824078093  | S | -47.0562840838 | 3.8944279057  | 0.2020613658  |
| H  | 24.5322560978 | -5.7657234286  | -3.1741320005 | C | -49.735818606  | 3.1520251417  | 0.4300728846  |
| C  | 21.0663233824 | -4.562057477   | -2.1379916743 | C | -52.7120294016 | 1.0142440721  | 0.7279600097  |
| C  | 21.4674605525 | -4.34630515    | -3.4445959206 | O | -50.1207689491 | 4.455888893   | 0.2902501491  |
| H  | 23.0899280751 | -4.6301889621  | -4.8397194021 | O | -48.5077628702 | -0.8767257053 | 0.7941709272  |
| H  | 20.0938453339 | -4.2563088686  | -1.768238818  | C | -50.2748583279 | 5.1428005157  | 1.5258188355  |
| H  | 20.799906884  | -3.8498696002  | -4.1403057711 | H | -50.574695174  | 6.1623768434  | 1.2756932525  |
| C  | 20.0524696839 | -6.9443942228  | 2.859007925   | H | -51.0497300209 | 4.6738731697  | 2.1453506687  |
| C  | 21.1669980816 | -5.042045967   | 3.6662443813  | H | -49.3319784426 | 5.1674752364  | 2.0861858718  |
| C  | 19.6300112076 | -7.2464562369  | 4.1599623739  | C | -48.2998961592 | -1.3013628119 | 2.1357242587  |
| C  | 20.7788028912 | -5.2980259356  | 4.9695599401  | H | -48.0040329079 | -2.3510151456 | 2.0838465905  |
| H  | 21.7820311574 | -4.1910794435  | 3.3948286231  | H | -47.5031729898 | -0.7186333391 | 2.6152526131  |
| C  | 19.9925044819 | -6.4220278841  | 5.2130599341  | H | -49.218906763  | -1.210110676  | 2.7276347837  |
| H  | 19.0248621999 | -8.1256591174  | 4.3292824253  | C | -34.7682168204 | 3.8544109923  | -0.3921765877 |
| H  | 21.0869012708 | -4.6305550898  | 5.7668306398  | S | -35.3805686523 | 1.3853046912  | -0.2317039736 |
| H  | 19.6642849979 | -6.6580497146  | 6.2213567055  | C | -36.17282613   | 3.8073851654  | -0.3216346821 |
| C  | 19.792990313  | -7.7061680603  | 1.6458567875  | C | -36.6913478745 | 2.5360496496  | -0.229709691  |
| C  | 19.0538392887 | -8.8908021552  | 1.5707553827  | C | -40.6087175455 | 2.1143296638  | -0.0192020589 |
| C  | 20.3685632657 | -7.1782472564  | 0.4551633867  | C | -41.9760460882 | 2.5480826181  | 0.0313241601  |
| C  | 18.8625869667 | -9.5793868233  | 0.3885465896  | C | -42.4329528499 | 3.848604481   | -0.0340705884 |
| C  | 20.187136345  | -7.8747628792  | -0.7426882849 | S | -43.3542308401 | 1.4852751073  | 0.1945297887  |
| C  | 19.4460587287 | -9.0452687914  | -0.7534593317 | C | -43.8291827088 | 3.9868498551  | 0.0453672032  |
| H  | 18.2864584989 | -10.4960215185 | 0.3599617761  | C | -44.4994204511 | 2.7953043443  | 0.1760793308  |
| H  | 20.6138677209 | -7.5216084511  | -1.6755418782 | C | -45.9134689684 | 2.5574233365  | 0.2889751179  |
| N  | 20.8135741626 | -5.8347881411  | 2.645727605   | C | -38.0629651998 | 2.1355371004  | -0.1434189196 |

|   |                |               |               |   |                |               |               |
|---|----------------|---------------|---------------|---|----------------|---------------|---------------|
| N | 21.8515667705  | -5.1710828652 | -1.2392232716 | C | -38.6068876387 | 0.8672831979  | -0.0598522398 |
| F | 19.2769872866  | -9.6992249284 | -1.9098618633 | C | -34.1604228369 | 2.6220909802  | -0.3551861431 |
| F | 18.4904619217  | -9.4118203123 | 2.6772772186  | H | -53.7747290022 | 0.8095544413  | 0.7642287043  |
| F | 25.7744028448  | -6.7742941766 | -1.7260113672 | F | 5.8531472595   | 3.4176439845  | -0.4159479482 |
| F | 25.5116312552  | -8.1786743315 | 2.7124308992  | F | 3.0441726921   | 3.3999910714  | -0.5184885184 |
| C | -0.6868006505  | -1.9247378922 | -0.157685162  | F | -1.6984685457  | 3.500085543   | -0.7709837291 |
| C | -0.1984491195  | -0.5864691324 | -0.2855842383 | F | -4.4773059648  | 3.8237014887  | -0.8252078581 |
| S | 0.5548066793   | 1.8558292471  | -0.5053161927 | F | -14.4053613896 | -2.8372368534 | -0.1314226392 |
| S | 1.8985783164   | -2.1870957546 | -0.0535090162 | F | -17.2006865906 | -2.5591408729 | -0.1935231044 |
| F | -1.9808393327  | -2.2143925725 | -0.1594034154 | F | -21.9032412705 | -2.280758768  | -0.355357095  |
| C | 0.2868231006   | -2.8710491949 | -0.0298890706 | F | -24.6946155604 | -2.3772494433 | -0.3336082995 |
| O | -1.0715509739  | -4.7625408496 | 0.1547766465  | F | -34.1127544645 | 5.0073747461  | -0.486471525  |
| C | -1.2066233359  | -6.1736046021 | 0.3155432862  | F | -36.9173327011 | 4.9107502049  | -0.3441352598 |
| H | -2.2793419327  | -6.3656703212 | 0.3100701686  | F | -41.6389073111 | 4.9089609578  | -0.1599863427 |
| H | -0.7161179348  | -6.7024519884 | -0.5058920145 | F | -44.415726739  | 5.1791350208  | -0.0034164612 |
| H | -0.7619734866  | -6.4965199519 | 1.2605771546  | C | -2.7643645078  | 2.4451149666  | 10.1924048958 |
| C | 0.1917201169   | -4.3248416192 | 0.132808344   | C | -1.6312072341  | 2.006376867   | 11.0529990896 |
| O | 1.167413356    | -5.0381651026 | 0.2363555029  | C | -0.4448435762  | 2.6745149735  | 10.4455646148 |
| C | -8.1046453751  | 0.162017934   | -0.357597221  | C | -0.9000632445  | 3.6606551882  | 9.5040979873  |
| C | -8.5193404548  | 1.5068458824  | -0.5561851405 | C | -1.213860168   | -1.3638054799 | 3.2488000545  |
| C | -10.8185710388 | 0.8578256988  | -0.4876836628 | C | -1.6427984534  | -2.4765138145 | 4.065962278   |
| C | -10.4027542942 | -0.4860956315 | -0.2860819091 | C | -0.475695773   | -3.0278730672 | 4.7191459076  |
| C | -9.0665869609  | -0.8492932457 | -0.2072351135 | C | 0.6731327999   | -2.2506713378 | 4.3082248396  |
| C | -6.6861927869  | 0.0427536365  | -0.344269538  | C | 0.2159949609   | -1.2241657939 | 3.3990705686  |
| H | -6.1757353375  | -0.9068197774 | -0.2242549484 | C | -2.325056914   | 3.5206112142  | 9.3518641779  |
| C | -12.2379920223 | 0.9683715623  | -0.5409642554 | C | -3.7382522782  | 1.5813369266  | 9.7232513237  |
| S | -11.7592810606 | -1.5705065654 | -0.1711650621 | C | -1.4943378837  | 0.4118548887  | 11.2306429704 |
| H | -12.7496518915 | 1.9094676295  | -0.7127459203 | C | 0.7455020484   | 2.0172406107  | 10.1871096624 |
| S | -7.1587853785  | 2.5809187276  | -0.7222042536 | C | -0.1211266894  | 4.0253375601  | 8.402774897   |
| C | -9.8566567736  | 1.8731613933  | -0.6122898407 | C | -2.0138122961  | -0.2249658249 | 3.1586357065  |
| C | -12.8818634944 | -0.2306174763 | -0.3821583819 | C | -2.8517621387  | -2.4044669372 | 4.7539056114  |
| O | -10.2272253482 | 3.1707881515  | -0.8204386751 | C | -0.5687016321  | -3.4833135417 | 6.0311209178  |
| O | -8.6977287104  | -2.1517670688 | -0.025838175  | C | 1.6787860092   | -1.9631158498 | 5.227159341   |
| C | -10.4032561568 | 3.917470929   | 0.3782493254  | C | 0.7851148036   | 0.0476002133  | 3.4504016012  |
| H | -10.6896319708 | 4.9255197525  | 0.0726075179  | C | -2.9195547056  | 3.7534398807  | 8.1089378946  |
| H | -11.1957638081 | 3.4835028489  | 1.000739832   | C | -3.6117184352  | 0.1379456591  | 9.8935542674  |
| H | -9.4729035566  | 3.9619180727  | 0.9576360475  | C | -0.2081265305  | -0.1785937839 | 10.7793797914 |
| C | -8.5302350037  | -2.5142563589 | 1.3401688649  | C | 1.5393770418   | 2.3658875223  | 9.0388297852  |
| H | -8.2499244228  | -3.5693118472 | 1.3457465666  | C | -0.7364670828  | 4.2403851579  | 7.1159205954  |
| H | -7.7369583599  | -1.921112825  | 1.812173061   | C | -3.2588801149  | -0.1533296536 | 3.8811709153  |
| H | -9.4629433764  | -2.3812649293 | 1.9018971583  | C | -2.9400483454  | -2.8705142538 | 6.1160604699  |
| C | 11.8129290611  | -0.2348268698 | 0.1419798873  | C | 0.4742016285   | -3.1777707888 | 6.9810427418  |
| C | 11.2504407947  | -1.5397772369 | 0.1240326121  | C | 2.2572554678   | -0.6426712303 | 5.2812405274  |
| C | 9.0423097613   | -0.6425332881 | -0.0409515011 | C | -0.0486894244  | 1.2207435866  | 3.3601871962  |

|   |                |               |               |   |               |               |               |
|---|----------------|---------------|---------------|---|---------------|---------------|---------------|
| C | 9.6039858736   | 0.6622654327  | -0.0365924287 | C | -1.4190197732 | 1.0873815568  | 3.2172424879  |
| C | 10.9720191986  | 0.8840060494  | 0.0420717317  | C | -3.6705769288 | -1.2199546758 | 4.6621638154  |
| C | 13.2358223007  | -0.2745370726 | 0.2619534641  | C | -1.8227757277 | -3.4014026233 | 6.7407385037  |
| H | 13.8505727536  | 0.6179566085  | 0.2827729716  | C | 1.5732940536  | -2.4310517829 | 6.5875421892  |
| C | 7.6198296588   | -0.6060304888 | -0.1136202083 | C | 1.818276254   | 0.34109294    | 4.4115148756  |
| S | 8.3731228475   | 1.8915831192  | -0.1235457343 | C | -2.1066023172 | 4.1081693118  | 6.9718500588  |
| H | 7.0069811854   | -1.5012487681 | -0.1064478733 | C | -4.3291645579 | 1.7946366029  | 8.4275373099  |
| S | 12.4807146114  | -2.7622447188 | 0.2617711209  | C | -2.5147950856 | -0.4019874894 | 10.5255021084 |
| C | 9.8844004845   | -1.763050446  | 0.0263694995  | C | 0.8647510449  | 0.5733427062  | 10.3562193758 |
| C | 13.7434453002  | -1.5412563352 | 0.3274470863  | C | 1.1239002883  | 3.3611280242  | 8.1676594581  |
| O | 9.3737023243   | -3.0297964716 | 0.0345583407  | C | -3.9402170962 | 2.8679419488  | 7.6389522867  |
| O | 11.4814677771  | 2.1523062902  | 0.0608510788  | C | -4.1399787104 | -0.4991093216 | 8.7110622972  |
| C | 9.1970645517   | -3.5855098521 | -1.2628418228 | C | -0.4748827801 | -1.4240453254 | 10.1150995183 |
| H | 8.7882190063   | -4.5869448756 | -1.1152510636 | C | 2.1572344064  | 1.1733009491  | 8.5175456001  |
| H | 8.4953679432   | -2.9871515763 | -1.8575833094 | C | 0.1452312451  | 3.7302022952  | 6.0930690088  |
| H | 10.1529061257  | -3.6558604481 | -1.7966064611 | C | -3.4376041683 | 1.1981953239  | 4.3594018401  |
| C | 11.7907537731  | 2.6621514904  | -1.2302138479 | C | -3.8237427999 | -1.9926430656 | 6.8463108683  |
| H | 12.1802784667  | 3.6706897617  | -1.0776915811 | C | -0.1345333832 | -2.9276078197 | 8.2644168664  |
| H | 12.5510564951  | 2.0459302875  | -1.7266664814 | C | 2.5240570446  | -0.3124591791 | 6.6617147638  |
| H | 10.8959441691  | 2.7093963033  | -1.8631681497 | C | 0.4844112171  | 2.2374674322  | 4.2388453098  |
| C | 7.1114693241   | 0.664443218   | -0.1693338308 | C | -2.3053811156 | 1.9656415585  | 3.9471275397  |
| C | 5.7244903914   | 1.0380427464  | -0.2394222356 | C | -4.2736911735 | -0.974669684  | 5.9513196291  |
| C | 5.1585892923   | 2.2852373968  | -0.3544881767 | C | -1.5492546371 | -3.0664207046 | 8.1162840447  |
| S | 4.4626344359   | -0.1609036763 | -0.1914285092 | C | 2.1039008702  | -1.4157307237 | 7.4655673433  |
| C | 3.7517948613   | 2.2779702128  | -0.4061631203 | C | 1.6331164262  | 1.6921273338  | 4.8894319172  |
| C | 3.1906050663   | 1.0239459258  | -0.3313939639 | C | -2.6454975214 | 3.4584370986  | 5.8012559252  |
| C | -0.7402163371  | 0.6956724816  | -0.4287742879 | C | -4.5875135278 | 0.5167629277  | 7.8139045698  |
| C | -2.0975031163  | 1.1565102467  | -0.5021523207 | C | -1.8866044142 | -1.5610923814 | 9.9632943795  |
| C | -2.5217794343  | 2.4609323409  | -0.6569608552 | C | 1.7378982161  | 0.0729264037  | 9.3230213023  |
| S | -3.5036788402  | 0.1259602743  | -0.3927306771 | C | 1.2934635533  | 3.1835449027  | 6.7431482095  |
| C | -3.9171931622  | 2.6260329273  | -0.6843818312 | C | -3.7765439652 | 2.6894999982  | 6.2137947756  |
| C | -4.6179049243  | 1.4521874481  | -0.5502080596 | C | -3.6233086901 | -1.7238945882 | 8.2224955976  |
| C | -6.0390472302  | 1.2380087399  | -0.517959408  | C | 0.419611727   | -1.9972991967 | 9.1748406227  |
| C | 1.806368171    | 0.6593539906  | -0.3464985316 | C | 2.4288739179  | 1.0183630367  | 7.1355586197  |
| C | 1.2271889838   | -0.5918076007 | -0.2418570014 | C | -0.3584855916 | 3.1668786242  | 4.8937714366  |
| C | -20.4279146985 | 3.0589494638  | -0.7268736422 | C | -1.8084421749 | 3.0255724815  | 4.7424160428  |
| C | -20.0587708481 | 1.6816731236  | -0.6169972478 | C | -4.5332436747 | 0.3402425481  | 6.4085056862  |
| S | -19.522290586  | -0.8190413275 | -0.4163012872 | C | -2.4449049277 | -2.2762784714 | 8.8732574613  |
| S | -17.8270547548 | 3.1055794401  | -0.7051368407 | C | 1.5778987975  | -1.2181922314 | 8.765583436   |
| F | -21.6930340729 | 3.4554849874  | -0.7705424248 | C | 1.9731334952  | 2.0608622067  | 6.2135878738  |
| C | -19.3744015825 | 3.9231094593  | -0.7824394311 | C | -4.1062268015 | 1.4685153271  | 5.5781603138  |
| O | -20.5613584368 | 5.9283133835  | -0.9456301562 | C | -1.7784701062 | 1.3357633137  | 12.3951295667 |
| C | -20.572592079  | 7.3511618347  | -1.0513668661 | C | -3.1839779934 | 1.2747066658  | 12.948986562  |
| H | -21.6250956166 | 7.6325188836  | -1.0780125999 | C | -0.8281376691 | 1.5461256616  | 13.5830793054 |



|   |                |               |               |   |               |               |               |
|---|----------------|---------------|---------------|---|---------------|---------------|---------------|
| H | -20.0743060431 | 7.8041885136  | -0.1903132339 | C | -3.9241194746 | 2.4454584965  | 13.1256451401 |
| H | -20.0643844518 | 7.672277086   | -1.9644162155 | C | -3.7122063575 | 0.0649007884  | 13.4036501169 |
| C | -19.3409031549 | 5.3848962594  | -0.8923447565 | H | -1.2086167876 | 2.4391948964  | 14.0990469686 |
| O | -18.3055985837 | 6.0158259908  | -0.9287906168 | H | -1.032431869  | 0.7119509766  | 14.2694135862 |
| C | -28.0248624025 | 1.5660518787  | -0.5537235047 | C | 0.6815971063  | 1.6871477807  | 13.4256621018 |
| C | -28.5342479124 | 0.2442232937  | -0.4401748914 | C | -5.1755082867 | 2.4059950815  | 13.7337889374 |
| C | -30.7808110397 | 1.0576717778  | -0.4206812153 | H | -3.5197384963 | 3.3933852435  | 12.7786904119 |
| C | -30.2718415053 | 2.3792423657  | -0.5400020865 | C | -4.9631440651 | 0.0232193128  | 14.0124107125 |
| C | -28.9138405456 | 2.6509780592  | -0.6186500266 | H | -3.141434652  | -0.8515547103 | 13.2738967365 |
| C | -26.6010235508 | 1.5828572648  | -0.5771208938 | H | 1.1184454463  | 0.7999757996  | 12.9602453819 |
| H | -26.0232277073 | 2.4992302245  | -0.635055135  | H | 0.9378347288  | 2.5331167541  | 12.7826332609 |
| C | -32.2030815818 | 1.0444105382  | -0.3432999074 | C | 1.3288374104  | 1.8955246725  | 14.7884910387 |
| S | -31.5492448308 | 3.5621284128  | -0.5527616614 | C | -5.6987911985 | 1.194084059   | 14.1768759768 |
| H | -32.7780244054 | 0.1323593105  | -0.2230040957 | H | -5.7429751072 | 3.3241264098  | 13.8590202666 |
| S | -27.2562046457 | -0.9348059555 | -0.367261637  | H | -5.3639936048 | -0.9264077465 | 14.3562135342 |
| C | -29.8932277966 | -0.0294013397 | -0.3841146827 | H | 0.9300542075  | 2.7874714509  | 15.2902904335 |
| C | -32.7616253204 | 2.2938642907  | -0.4063431838 | H | 1.1153045503  | 1.0588041036  | 15.4673822405 |
| O | -30.349101113  | -1.3098182356 | -0.2544922387 | C | 2.8273879952  | 2.0460063086  | 14.6932825302 |
| O | -28.4545400428 | 3.9335624905  | -0.7162175576 | H | -6.6772079327 | 1.1621015466  | 14.6482816764 |
| C | -30.6375498237 | -1.946457779  | -1.4941695095 | O | 3.4740796333  | 2.0023583457  | 13.6736864629 |
| H | -30.984135815  | -2.952153306  | -1.2492444894 | O | 3.3686167772  | 2.2386911704  | 15.9076291335 |
| H | -31.4237447781 | -1.4105765495 | -2.0406341467 | C | 4.7858428118  | 2.3913219441  | 15.9148251764 |
| H | -29.7411823392 | -2.0117451543 | -2.1230881317 | H | 5.2721128568  | 1.5002271685  | 15.5086046796 |
| C | -28.2764769939 | 4.3769598653  | -2.0565007529 | H | 5.0838459143  | 3.2569674332  | 15.3169295096 |
| H | -27.9171681323 | 5.405962277   | -1.9945780202 | H | 5.0624777892  | 2.5350594237  | 16.959555529  |
| H | -27.5361143495 | 3.7602430033  | -2.5814578029 |   |               |               |               |

**Table S20.** The coordinate of 3/PC<sub>71</sub>BM (296 atoms).

| Atom | Coordinates (Angstroms) |               |               | Atom | Coordinates (Angstroms) |               |               |
|------|-------------------------|---------------|---------------|------|-------------------------|---------------|---------------|
|      | X                       | Y             | Z             |      | X                       | Y             | Z             |
| C    | 14.5390042527           | -0.2173356098 | 0.6941898212  | S    | -17.7566708962          | 1.0112647541  | 0.1117184627  |
| C    | 16.6059216862           | -1.656098683  | 0.688849674   | C    | -20.5388556877          | 0.8401159446  | 0.0447929713  |
| C    | 15.2191688887           | -1.4431148177 | 0.5903464575  | C    | -16.9097422294          | -0.1991366443 | -0.8540485202 |
| C    | 13.0543587245           | -0.1950618427 | 0.5307690014  | C    | -23.9246749594          | -0.320192952  | -0.8728828303 |
| C    | 12.3469901924           | 0.9050292261  | 1.0304172637  | O    | -20.6342082104          | 1.9242152307  | 0.8695554116  |
| C    | 10.9673600977           | 0.9754892835  | 0.9242345742  | O    | -20.2037910872          | -2.4763071725 | -2.5571847703 |
| C    | 10.2387104297           | -0.0445098713 | 0.2942029679  | C    | -20.8089042884          | 1.5890503275  | 2.2407663137  |
| C    | 10.9526832109           | -1.1293910098 | -0.2390697151 | H    | -20.8625430532          | 2.5348694839  | 2.7834607605  |
| C    | 12.3310474182           | -1.2061880264 | -0.1157575018 | H    | -21.7365783494          | 1.0247199745  | 2.3964575428  |
| H    | 14.6101083122           | -2.318619204  | 0.4157773733  | H    | -19.9607520129          | 1.0013344227  | 2.613472402   |
| H    | 12.9037749037           | 1.7045902297  | 1.5080288656  | C    | -19.9696957594          | -3.7170868695 | -1.9024713362 |
| H    | 10.4433931846           | 1.8264629577  | 1.3521629037  | H    | -19.929173627           | -4.4750181189 | -2.6872330028 |
| H    | 10.4212116735           | -1.9063651119 | -0.7807049953 | H    | -19.0186646993          | -3.7054830423 | -1.3560699306 |
| H    | 12.8489351978           | -2.0468643591 | -0.5673070779 | H    | -20.7839236811          | -3.9544864083 | -1.2065482859 |

|    |               |               |               |   |                |               |               |
|----|---------------|---------------|---------------|---|----------------|---------------|---------------|
| C  | 17.1328160145 | -3.0528263604 | 0.5945164908  | S | -26.8993045965 | 2.2710517106  | 1.4768809112  |
| C  | 16.3506454648 | -4.1830871588 | 0.8612284319  | C | -28.3249536341 | -0.2984323261 | -0.9280386659 |
| C  | 18.4775213143 | -3.2330441201 | 0.247082191   | C | -26.1297907998 | -1.1357222574 | -1.6707026734 |
| C  | 16.8946253198 | -5.4593445395 | 0.7646790928  | C | -27.5392664103 | -1.1394596708 | -1.6954568981 |
| H  | 15.3182778806 | -4.0707620254 | 1.178324591   | H | -25.6223676385 | -1.8397839585 | -2.3246158298 |
| C  | 19.0181265469 | -4.5085270046 | 0.1408190747  | H | -28.0196452826 | -1.8526746894 | -2.3597253732 |
| H  | 19.0879243167 | -2.3535945042 | 0.0688506703  | C | -27.5932922137 | 0.6038729481  | -0.0809607867 |
| C  | 18.2274846421 | -5.6269192806 | 0.3966521661  | C | -26.1416972613 | 0.6060219108  | -0.053449126  |
| H  | 16.2765942725 | -6.3256905414 | 0.9846692736  | C | -25.3761006803 | -0.2921347184 | -0.8745968287 |
| H  | 20.0612400155 | -4.6309314217 | -0.1383881641 | N | -25.6410377531 | 1.5058046613  | 0.7931246679  |
| H  | 18.650212952  | -6.6250208314 | 0.3180337413  | N | -28.1282159645 | 1.5056090726  | 0.7422489932  |
| O  | 15.055024972  | 0.9141570461  | 0.9635754877  | C | -32.0380818085 | 0.0847410748  | -0.5535655574 |
| O  | 17.5010193893 | -0.7615062303 | 0.8164806642  | C | -32.1451148663 | -0.8916995492 | -1.5792967272 |
| Ir | 17.1592923959 | 1.342812427   | 1.1482708493  | C | -34.5309368901 | -0.8356124756 | -1.4638184106 |
| C  | 19.097611116  | 1.6384081652  | 1.4493483109  | C | -34.4254464514 | 0.1465945788  | -0.4433235231 |
| C  | 20.0462992962 | 2.0535894753  | 0.5107552015  | C | -33.2029948675 | 0.6222432914  | 0.0141294326  |
| C  | 19.5320717007 | 1.345644134   | 2.7736056029  | C | -30.6778293877 | 0.3779793416  | -0.2349055798 |
| C  | 21.3784700409 | 2.1574456771  | 0.8761497733  | H | -30.3783655121 | 1.0763343193  | 0.5348812834  |
| H  | 19.7672963835 | 2.2989170613  | -0.5083852792 | C | -35.899509495  | -1.1627786214 | -1.743596566  |
| C  | 20.8906591889 | 1.4679299226  | 3.0817242658  | S | -35.9960076191 | 0.6337208683  | 0.1340733093  |
| C  | 21.8345233792 | 1.8687458561  | 2.1563148451  | H | -36.1989141814 | -1.9061136693 | -2.4731861909 |
| H  | 22.880526481  | 1.9561211764  | 2.4231354636  | S | -30.5777202388 | -1.4141592061 | -2.1227652197 |
| C  | 18.4843714045 | 0.9557014149  | 3.7056726865  | C | -33.3664378855 | -1.3525183367 | -2.0497411152 |
| C  | 18.6289702766 | 0.6372584735  | 5.0621547787  | C | -29.7754482547 | -0.3300404546 | -0.9824223354 |
| C  | 17.5138679778 | 0.3179861794  | 5.8198042998  | O | -33.4285673381 | -2.3077215694 | -3.0262343231 |
| H  | 19.6143589616 | 0.6472863971  | 5.5055853299  | O | -33.1501944081 | 1.5523952582  | 1.0120615361  |
| C  | 16.1651597902 | 0.6356080881  | 3.8816555695  | C | -33.5334972574 | -1.7743027673 | -4.3396681201 |
| C  | 16.2537013774 | 0.3196724388  | 5.2260316298  | H | -33.567731427  | -2.6294059355 | -5.0178914429 |
| H  | 17.6281600986 | 0.0720552683  | 6.8717804459  | H | -34.4485344432 | -1.1792773158 | -4.4539562557 |
| H  | 15.2201026239 | 0.6634463793  | 3.3505542092  | H | -32.6656771189 | -1.1492552122 | -4.5845195682 |
| H  | 15.3558028411 | 0.0815018183  | 5.7856607293  | C | -32.9747518198 | 2.8855358183  | 0.5493004201  |
| C  | 16.8065505168 | 3.1216125221  | -1.1236174424 | H | -32.9572803994 | 3.5190776278  | 1.4382897716  |
| C  | 17.3894490286 | 0.9533367562  | -1.8102021578 | H | -32.0300606518 | 2.995898327   | 0.0028227314  |
| C  | 16.7231479785 | 3.5212708027  | -2.4637146759 | H | -33.8054531334 | 3.1893321878  | -0.0998447405 |
| C  | 17.3247861132 | 1.2987601228  | -3.1486035673 | C | -36.7681757209 | -0.4579149849 | -0.9765741569 |
| H  | 17.6551503401 | -0.0438796266 | -1.4769593052 | H | -37.8491288233 | -0.5219961245 | -0.9838624177 |
| C  | 16.9805485755 | 2.6088380888  | -3.4742207409 | C | 1.8967935135   | 3.1073785761  | 9.9603888986  |
| H  | 16.4603502102 | 4.5433843811  | -2.6961923807 | C | 3.1804651905   | 2.4903137688  | 10.395484456  |
| H  | 17.5386937031 | 0.5564359622  | -3.9097253299 | C | 4.0718331569   | 2.6523711288  | 9.2118693589  |
| H  | 16.9157979674 | 2.9206475588  | -4.512827253  | C | 3.4526051672   | 3.5610292342  | 8.2865022471  |
| C  | 16.6011763574 | 3.9459970679  | 0.0584413114  | C | -0.6753365534  | -2.0825106166 | 4.3401120834  |
| C  | 16.2706503634 | 5.3047551896  | 0.0558284945  | C | -0.9053239993  | -2.8592312188 | 5.537177028   |
| C  | 16.7746440554 | 3.2830264845  | 1.3065844819  | C | 0.2904130636   | -3.6263836483 | 5.8094820463  |
| C  | 16.1110324867 | 6.038252453   | 1.2154619292  | C | 1.260490803    | -3.3179078972 | 4.7815006588  |

|   |               |               |               |   |               |               |               |
|---|---------------|---------------|---------------|---|---------------|---------------|---------------|
| C | 16.6247315245 | 4.0215856095  | 2.4836266421  | C | 0.6618602432  | -2.3651762803 | 3.8735661807  |
| C | 16.2980897537 | 5.3662036537  | 2.4166773212  | C | 2.1179806469  | 3.8420919895  | 8.7487403898  |
| H | 15.8555401362 | 7.0901988372  | 1.1832947453  | C | 0.662890527   | 2.517981848   | 10.1713196986 |
| H | 16.7570408985 | 3.5678271625  | 3.4601550681  | C | 3.0532362248  | 0.981981957   | 10.9466773244 |
| N | 17.1345470975 | 1.8319295328  | -0.8311903576 | C | 4.8544557728  | 1.628736266   | 8.7061122544  |
| N | 17.2427415253 | 0.9374407118  | 3.144563284   | C | 3.7061289391  | 3.4832374806  | 6.9144492776  |
| F | 16.1529856519 | 6.0591830277  | 3.5536183654  | C | -1.1776888444 | -0.7852890063 | 4.2525447795  |
| F | 16.0929185217 | 5.9590486425  | -1.1075092709 | C | -1.629446543  | -2.308509941  | 6.591588339   |
| F | 21.3339494086 | 1.1922159089  | 4.3233883034  | C | 0.7098217505  | -3.8095892415 | 7.1239489031  |
| F | 22.2760033095 | 2.5518390036  | -0.0362283666 | C | 2.6086846472  | -3.2066576232 | 5.113638845   |
| C | 6.5446711602  | -0.6324600905 | -0.0278062593 | C | 1.4391889147  | -1.3386482686 | 3.3399248722  |
| C | 6.4028740253  | 0.7740215054  | 0.1125193712  | C | 1.0874766631  | 4.0377359184  | 7.825574434   |
| C | 4.0261767285  | 0.6117508517  | -0.0726576421 | C | 0.5543324695  | 1.1540206391  | 10.6772949048 |
| C | 4.1677986333  | -0.7953709916 | -0.2104919471 | C | 3.84567169    | -0.0399971222 | 10.2153614842 |
| C | 5.4001527166  | -1.4316644732 | -0.1735861711 | C | 5.0960209573  | 1.5235007727  | 7.2914680882  |
| C | 7.9149510035  | -1.0313275802 | 0.0201721099  | C | 2.6340673792  | 3.6624965119  | 5.966006098   |
| H | 8.2301125969  | -2.0657238905 | -0.0552777617 | C | -1.9172080829 | -0.2175152205 | 5.35155429    |
| C | 2.6603953712  | 1.0183873736  | -0.1359028499 | C | -1.1850026338 | -2.4947567497 | 7.9512071978  |
| S | 2.624205957   | -1.5710847067 | -0.4154425513 | C | 2.107040349   | -3.6857970295 | 7.4637300805  |
| H | 2.335353472   | 2.0474119979  | -0.0641564281 | C | 3.4059629707  | -2.1370065664 | 4.5631144562  |
| S | 7.9476370458  | 1.5548830044  | 0.2848152549  | C | 0.914582728   | 0.0010312771  | 3.2566545169  |
| C | 5.1688472975  | 1.4086905063  | 0.1032657201  | C | -0.3673119991 | 0.2722657061  | 3.7015952999  |
| C | 8.7822970221  | 0.0113960052  | 0.1906267177  | C | -2.1401426752 | -0.9625951404 | 6.4971697014  |
| C | 1.7872929897  | -0.0218563975 | -0.3099405732 | C | -0.0414670655 | -3.2326606176 | 8.2128642594  |
| O | 5.0917561796  | 2.7653788415  | 0.2249665811  | C | 3.0358750649  | -3.3881152599 | 6.4793468267  |
| O | 5.492608885   | -2.7897561001 | -0.3012642484 | C | 2.8314396797  | -1.2225765649 | 3.6957715161  |
| C | 4.7443688062  | 3.2129242314  | 1.5309072763  | C | 1.3519449714  | 3.9330290385  | 6.4117274055  |
| H | 4.7568739015  | 4.3039141408  | 1.4929541378  | C | -0.392730598  | 2.6860078991  | 9.2061804138  |
| H | 3.743965734   | 2.8686368548  | 1.8184890999  | C | 1.6822868362  | 0.4163787924  | 10.954879967  |
| H | 5.4726322922  | 2.8638202673  | 2.2730898748  | C | 4.7391554871  | 0.2665928957  | 9.2137704357  |
| C | 5.5088954203  | -3.474060887  | 0.9460200516  | C | 4.5447301456  | 2.4404889239  | 6.4094731399  |
| H | 5.5410214805  | -4.5402006611 | 0.7122499957  | C | -0.1919265791 | 3.4426032611  | 8.0607507447  |
| H | 6.393387819   | -3.200914669  | 1.5354575406  | C | -0.5690265164 | 0.5237998604  | 10.026404931  |
| H | 4.6074500881  | -3.2537497136 | 1.5312631298  | C | 3.0593982719  | -1.2354916382 | 10.0883351358 |
| S | -1.1955858328 | 3.2863713929  | 0.760982393   | C | 5.1526155837  | 0.1301907199  | 6.9287966093  |
| C | -2.6006935858 | 0.0262719404  | -0.5872243309 | C | 2.832230591   | 2.7451467417  | 4.8688995803  |
| C | -0.4034976873 | -1.0549997383 | -0.8634657976 | C | -1.5802649253 | 1.1830839529  | 5.4604689857  |
| C | -1.8110323505 | -1.0507092849 | -0.9486776302 | C | -1.4421380736 | -1.2806656816 | 6.8887477059  |
| H | 0.1124957677  | -1.95646698   | -1.1828829423 | C | 2.2103474447  | -3.054454566  | 8.7566015965  |
| H | -2.2873499539 | -1.9558690984 | -1.3156619859 | C | 4.3287072516  | -1.6814463415 | 5.5769719664  |
| C | -1.8781276898 | 1.1722100344  | -0.1056105189 | C | 1.9825682161  | 0.9347241425  | 3.5332779056  |
| C | -0.4297214289 | 1.1695582832  | -0.0225047468 | C | -0.627111483  | 1.4875805081  | 4.44106256    |
| C | 0.3398090345  | 0.0196375088  | -0.4105553986 | C | -2.0301588784 | -0.3358304107 | 7.7936322035  |
| N | 0.065693123   | 2.3116827122  | 0.4547560078  | C | 0.88664552    | -2.7752130807 | 9.2176272071  |

|   |                |               |               |   |               |               |               |
|---|----------------|---------------|---------------|---|---------------|---------------|---------------|
| N | -2.418218627   | 2.3195797684  | 0.3064489055  | C | 4.1012123524  | -2.4542587617 | 6.7561572494  |
| C | -6.311624226   | 0.5569407042  | -0.5031708327 | C | 3.1640160322  | 0.1795417224  | 3.8063374994  |
| C | -6.4098939505  | -0.7008907817 | -1.1560359143 | C | 0.2216665858  | 3.2971915885  | 5.7780798606  |
| C | -8.7965936649  | -0.5796144061 | -1.1520442894 | C | -1.1553438226 | 1.4656036282  | 9.1286732303  |
| C | -8.6974573512  | 0.6815584963  | -0.5060315518 | C | 1.7367602426  | -0.9554021785 | 10.5435517462 |
| C | -7.481514053   | 1.2667082251  | -0.1862756375 | C | 4.9274781204  | -0.6403522838 | 8.1083271066  |
| C | -4.9569058681  | 0.921370081   | -0.2481972455 | C | 4.0119962407  | 1.9877661754  | 5.1443020396  |
| H | -4.6636959389  | 1.8292651985  | 0.2612644633  | C | -0.7302947737 | 2.9900326416  | 6.7979746877  |
| C | -10.1532827134 | -0.9689481873 | -1.3557238753 | C | -0.591250797  | -0.8631426406 | 9.740912265   |
| S | -10.2673537012 | 1.3511735115  | -0.1749054193 | C | 3.2933863553  | -2.2020111634 | 9.0764536823  |
| H | -10.4482635247 | -1.904825113  | -1.8108476016 | C | 4.7317333213  | -0.3262913572 | 5.6552403366  |
| S | -4.8394095984  | -1.3909516314 | -1.4427562663 | C | 1.7368763852  | 2.1722818905  | 4.1737635241  |
| C | -7.6257987754  | -1.275743706  | -1.4955971542 | C | 0.380515644   | 2.4603842222  | 4.6450293783  |
| C | -4.048661078   | -0.0049086283 | -0.688627985  | C | -1.7801868732 | 1.0517275865  | 7.9256573924  |
| C | -11.0608678519 | -0.0517374786 | -0.8942800297 | C | 0.6130828276  | -1.6345337821 | 10.0076480033 |
| O | -7.673775551   | -2.4961383644 | -2.10630397   | C | 4.273026212   | -1.8937681786 | 8.0457474818  |
| O | -7.438001827   | 2.4719180776  | 0.4537474516  | C | 4.133266119   | 0.6388383656  | 4.7308139051  |
| C | -7.8141444129  | -2.425788762  | -3.5198050355 | C | -1.5538120695 | 1.8419804636  | 6.7138832588  |
| H | -7.8329688445  | -3.4569406207 | -3.8780669057 | C | 3.5225538694  | 2.1266087722  | 11.8180381045 |
| H | -8.7477623535  | -1.9234282971 | -3.8014769545 | C | 2.5402314608  | 2.595515286   | 12.8677248802 |
| H | -6.9670359875  | -1.8964276626 | -3.9735153281 | C | 4.9270926858  | 2.2245638867  | 12.4312049707 |
| C | -7.1978515462  | 3.5757124054  | -0.4104376274 | C | 2.2245457241  | 3.9511813062  | 12.9789498321 |
| H | -7.1917321987  | 4.4650706237  | 0.2227663663  | C | 2.0303555777  | 1.7022701622  | 13.8118953068 |
| H | -6.2297086424  | 3.4812823018  | -0.9172507777 | H | 5.0111750524  | 3.2604245239  | 12.7893729797 |
| H | -7.9921181597  | 3.6669528744  | -1.161796129  | H | 4.8886315379  | 1.6101005467  | 13.3420830886 |
| S | -13.923434383  | -3.1140743288 | -2.770633565  | C | 6.1969285764  | 1.8760579787  | 11.663148385  |
| C | -15.4588356027 | -0.1911508729 | -0.8950085947 | C | 1.4036593979  | 4.404527655   | 14.0072540885 |
| C | -13.3006772932 | 0.836091947   | -0.2977443973 | H | 2.6199642778  | 4.6552615928  | 12.2506588904 |
| C | -14.7095249427 | 0.8020880143  | -0.2903036724 | C | 1.2092702897  | 2.153539308   | 14.8412368681 |
| H | -12.823929476  | 1.6640180716  | 0.2198838798  | H | 2.2729825222  | 0.6449592468  | 13.7359945234 |
| H | -15.2206406005 | 1.6122302946  | 0.2227349092  | H | 6.1871373865  | 0.837355666   | 11.3237044481 |
| C | -14.6890905475 | -1.2106993715 | -1.5545869447 | H | 6.3020893073  | 2.4948363248  | 10.7680848194 |
| C | -13.2375484234 | -1.1747746069 | -1.5637557209 | C | 7.4148391048  | 2.089315434   | 12.552511481  |
| C | -12.510682205  | -0.1188349877 | -0.9125262578 | C | 0.8921391969  | 3.5058505443  | 14.9399272377 |
| N | -12.6981721961 | -2.1994050797 | -2.2241098073 | H | 1.1615110427  | 5.4614448614  | 14.0774666016 |
| N | -15.1854892923 | -2.2636312602 | -2.2041076036 | H | 0.8147757001  | 1.4459718248  | 15.5653929124 |
| C | -19.1522041695 | -0.7523662799 | -1.2250335373 | H | 7.4847551452  | 3.1291130987  | 12.8985394916 |
| C | -19.3002715752 | 0.3601980331  | -0.3542632577 | H | 7.3542678878  | 1.4815415111  | 13.4659039264 |
| C | -21.6816660193 | 0.1980063817  | -0.4594857031 | C | 8.7053058321  | 1.7409436176  | 11.8524044594 |
| C | -21.5339614476 | -0.9186900593 | -1.3247893989 | H | 0.2478379329  | 3.8581257278  | 15.7407323959 |
| C | -20.2952679002 | -1.411231295  | -1.7077639244 | O | 8.7994454044  | 1.2840777308  | 10.7378329381 |
| C | -17.7815872395 | -1.0416135905 | -1.4923560294 | O | 9.7627056576  | 2.002188682   | 12.6388697194 |
| H | -17.4511323264 | -1.8362128039 | -2.147620141  | C | 11.0295750773 | 1.6965140628  | 12.0620116055 |
| C | -23.0521310346 | 0.5146979354  | -0.2257768538 | H | 11.0970874416 | 0.632243114   | 11.8201466605 |

|   |                |               |               |   |               |              |               |
|---|----------------|---------------|---------------|---|---------------|--------------|---------------|
| S | -23.0784168839 | -1.5470531161 | -1.8187076701 | H | 11.1868827347 | 2.2749952904 | 11.1475621637 |
| H | -23.3813803823 | 1.3428938903  | 0.3870573919  | H | 11.7701897009 | 1.9646680147 | 12.8158301015 |

**Table S21.** The coordinate of 4/PC<sub>71</sub>BM (338 atoms).

| Atom | Coordinates (Angstroms) |               |               | Atom | Coordinates (Angstroms) |               |               |
|------|-------------------------|---------------|---------------|------|-------------------------|---------------|---------------|
|      | X                       | Y             | Z             |      | X                       | Y             | Z             |
| C    | 17.7729904407           | 8.5385260378  | 0.8165491885  | S    | -29.178231736           | 0.9613201414  | 0.3031195834  |
| C    | 20.2817052593           | 8.4880214058  | 0.5851818981  | C    | -26.9371391987          | 2.5979362678  | 0.0051243141  |
| C    | 19.0066496017           | 7.8947345698  | 0.6165451593  | C    | -30.7128540875          | 1.8174902933  | 0.3945228809  |
| C    | 16.5162885067           | 7.7329777446  | 0.7502737966  | O    | -26.1236034708          | 1.5006141285  | -0.0301233882 |
| C    | 15.3503184329           | 8.2658076842  | 1.3135575854  | O    | -29.4860880579          | 5.9703679163  | 0.0594324786  |
| C    | 14.1555588235           | 7.5640089984  | 1.2811644855  | C    | -25.5792477858          | 1.1520659216  | 1.2368514079  |
| C    | 14.0754465074           | 6.3048660021  | 0.6679215599  | H    | -24.9606231241          | 0.2674419065  | 1.0730783257  |
| C    | 15.2374325321           | 5.7853136071  | 0.0763076803  | H    | -24.9595841224          | 1.963510469   | 1.6388221454  |
| C    | 16.4340287043           | 6.4827758866  | 0.1227965079  | H    | -26.3724481253          | 0.9146964969  | 1.9566130804  |
| H    | 18.9731546469           | 6.8256706421  | 0.462483566   | C    | -29.7579184689          | 6.4720330918  | 1.3623053047  |
| H    | 15.4016530677           | 9.2446990615  | 1.7788978331  | H    | -30.4089816831          | 7.33827403    | 1.228810867   |
| H    | 13.2734003523           | 7.9900425175  | 1.7526371626  | H    | -30.2687060724          | 5.7205849963  | 1.9774618427  |
| H    | 15.1901913517           | 4.8385967317  | -0.4539039989 | H    | -28.8348715311          | 6.7833390833  | 1.8668879412  |
| H    | 17.3008690098           | 6.0619446881  | -0.3770769722 | C    | -24.9045517148          | 5.6494610507  | -0.4420265362 |
| C    | 21.4814298081           | 7.6141056256  | 0.4014467384  | C    | -21.2918863258          | 7.111333986   | -0.8992776688 |
| C    | 21.4849135308           | 6.2493092705  | 0.7140340012  | C    | -22.1975677017          | 8.1421564282  | -1.0593813359 |
| C    | 22.6595843761           | 8.1959384973  | -0.0829031547 | C    | -23.5399574165          | 7.7391310453  | -0.9180599378 |
| C    | 22.6310815291           | 5.4837454575  | 0.5288371903  | C    | -23.6887209258          | 6.3953145757  | -0.6458810356 |
| H    | 20.5992601853           | 5.7833323322  | 1.1354645744  | S    | -22.1366303444          | 5.6238109293  | -0.5536938627 |
| C    | 23.8013747145           | 7.4286301813  | -0.2779812011 | H    | -21.8849691695          | 9.1549032559  | -1.2757798686 |
| H    | 22.6610304032           | 9.259975204   | -0.2966157359 | H    | -24.382591355           | 8.4144847098  | -1.0251165593 |
| C    | 23.7903260277           | 6.0685666067  | 0.0246754907  | S    | -37.2711402685          | -3.1281590875 | 1.2748839126  |
| H    | 22.6203141262           | 4.4278999647  | 0.7857405463  | C    | -38.6785970439          | 0.3905521974  | 1.5109463495  |
| H    | 24.7047450102           | 7.8937931986  | -0.6634117222 | C    | -36.5073805643          | 1.5095512345  | 1.1838536651  |
| H    | 24.684043882            | 5.4682050769  | -0.1232565415 | C    | -37.8984216236          | 1.5292623513  | 1.3995234384  |
| O    | 17.596807905            | 9.7680371797  | 1.0939191341  | H    | -36.0062827705          | 2.4709268092  | 1.1067809275  |
| O    | 20.538742787            | 9.7315543475  | 0.6552036477  | H    | -38.3711760107          | 2.5042762325  | 1.4836903636  |
| Ir   | 19.118662138            | 11.2978797687 | 1.0910808081  | C    | -37.9553608519          | -0.8463358926 | 1.3931506995  |
| C    | 20.5851755495           | 12.6287140833 | 1.2094048207  | C    | -36.5202054715          | -0.8666046584 | 1.1732898607  |
| C    | 21.048531126            | 13.467039548  | 0.1916746222  | C    | -35.7609749297          | 0.3492505297  | 1.0646568887  |
| C    | 21.232254935            | 12.6727083649 | 2.4770412268  | N    | -36.0262483701          | -2.1021612916 | 1.0911913068  |
| C    | 22.1252869352           | 14.3063247541 | 0.4265933448  | N    | -38.485261432           | -2.0674739262 | 1.4662340377  |
| H    | 20.5856315878           | 13.4789800372 | -0.7893743663 | C    | -34.3276215891          | 0.3607831583  | 0.8506476741  |
| C    | 22.314920324            | 13.540171804  | 2.6526320712  | C    | -33.4619860026          | -0.6940151602 | 0.6351282524  |
| C    | 22.7832716287           | 14.3652382228 | 1.6486826409  | C    | -32.1227069188          | -0.2957449188 | 0.4560925367  |
| H    | 23.6233755127           | 15.0285141607 | 1.8136459921  | C    | -31.9361485252          | 1.0686662969  | 0.5318111109  |
| C    | 20.6779382612           | 11.7918203244 | 3.494475457   | S    | -33.4461514711          | 1.8669386144  | 0.8410973912  |
| C    | 21.1059129374           | 11.6499218537 | 4.8208084843  | H    | -33.8016563568          | -1.7206607064 | 0.6059876153  |

|   |               |               |               |   |                |               |               |
|---|---------------|---------------|---------------|---|----------------|---------------|---------------|
| C | 20.4450196413 | 10.7776413522 | 5.6705354436  | H | -31.311794316  | -0.9905352631 | 0.2629960301  |
| H | 21.9501480472 | 12.2275056642 | 5.1694081445  | C | -47.9150521072 | 4.192749898   | 2.7681657483  |
| C | 18.9762330622 | 10.2206871596 | 3.8790976351  | C | -47.0036334906 | 5.2819494118  | 2.7580954014  |
| C | 19.356393473  | 10.0476919445 | 5.1983635141  | C | -45.1510083869 | 3.801505051   | 2.4537638629  |
| H | 20.777504053  | 10.6698388487 | 6.6991237004  | C | -46.064018165  | 2.7129257496  | 2.4595536853  |
| H | 18.1386897025 | 9.6912981029  | 3.4382924955  | C | -47.4330806353 | 2.8862410294  | 2.6024709347  |
| H | 18.8107745025 | 9.3575666319  | 5.832503985   | C | -49.2658291476 | 4.6341289427  | 2.9675103244  |
| C | 17.6164155082 | 12.5262048668 | -1.0732264035 | H | -50.1116953294 | 3.9595310564  | 3.0306414162  |
| C | 19.2224241036 | 11.0178635894 | -1.8848194869 | C | -43.8006960497 | 3.3600140201  | 2.3111309364  |
| C | 17.1936341451 | 12.7784011264 | -2.3846580071 | S | -45.2401689084 | 1.1890543153  | 2.2791941021  |
| C | 18.8450433377 | 11.2348952496 | -3.1983320906 | H | -42.9530972543 | 4.0366883214  | 2.3234335335  |
| H | 20.022272741  | 10.3390042831 | -1.6102843417 | S | -47.8276456853 | 6.7996949752  | 2.9922878635  |
| C | 17.8076894107 | 12.131511788  | -3.4450678641 | C | -45.634457848  | 5.1098949386  | 2.593469878   |
| H | 16.3903821901 | 13.4806547239 | -2.556072442  | O | -44.7843070252 | 6.1797110943  | 2.6056535219  |
| H | 19.3533297226 | 10.7117311626 | -4.000851752  | O | -48.2773409896 | 1.8108436007  | 2.6187239929  |
| H | 17.4788159019 | 12.3288270977 | -4.461447353  | C | -44.5119444027 | 6.7071851179  | 1.3135929871  |
| C | 17.1094846819 | 13.1298195761 | 0.1505100348  | H | -43.835033698  | 7.5509916613  | 1.461816314   |
| C | 16.0861801542 | 14.0798944234 | 0.226019384   | H | -44.0292404802 | 5.9576985784  | 0.6736796083  |
| C | 17.7423617157 | 12.7034591379 | 1.352808116   | H | -45.4308157084 | 7.0575531557  | 0.8272578107  |
| C | 15.6640437984 | 14.6314308888 | 1.4201015898  | C | -48.824365484  | 1.4965547676  | 1.3448126072  |
| C | 17.3265094302 | 13.264391299  | 2.5634401171  | H | -49.4675064781 | 0.626448534   | 1.4916927392  |
| C | 16.3079699816 | 14.2034535689 | 2.5741895271  | H | -49.4200704498 | 2.3304583893  | 0.9523865895  |
| H | 14.8696227933 | 15.3669683975 | 1.4486715105  | H | -48.0347202458 | 1.248956088   | 0.6244190548  |
| H | 17.7824185947 | 12.9831703269 | 3.5068444     | C | -43.6807020703 | 2.0016546495  | 2.2038789081  |
| N | 18.6275592496 | 11.6389454784 | -0.8575063926 | C | -40.1107581135 | 0.4426312961  | 1.7267975998  |
| N | 19.6153855438 | 11.0611951886 | 3.0542632354  | C | -41.0065720009 | -0.5877523941 | 1.9359423794  |
| F | 15.9179091903 | 14.7286004203 | 3.7428146986  | C | -42.3333401267 | -0.1515097277 | 2.1212724462  |
| F | 15.463314207  | 14.4984603365 | -0.8921009651 | C | -42.4795983177 | 1.2181175595  | 2.0567962638  |
| F | 22.9526373218 | 13.6003960288 | 3.8372775721  | S | -40.9477981136 | 1.9739701964  | 1.7495272185  |
| F | 22.5606800994 | 15.1001211534 | -0.560228289  | H | -40.6973018512 | -1.6241595813 | 1.9567255468  |
| C | 11.3120649592 | 3.769771375   | 0.5116413615  | H | -43.1640051733 | -0.8233457508 | 2.3114659542  |
| C | 10.4182872537 | 4.8697405428  | 0.6071493293  | C | -49.3581388373 | 5.9810557898  | 3.0944043815  |
| C | 8.5268419898  | 3.4137935581  | 0.4717527997  | H | -50.2552591431 | 6.564042265   | 3.2611225033  |
| C | 9.4217299593  | 2.3126997126  | 0.3910024836  | C | -2.2063360513  | 2.848213309   | 9.897714282   |
| C | 10.7999409474 | 2.4665036148  | 0.4204835697  | C | -1.217587781   | 2.247156424   | 10.8346695625 |
| C | 12.6757116913 | 4.1933334644  | 0.5259140417  | C | 0.0997388587   | 2.563699024   | 10.2125132468 |
| H | 13.5085215402 | 3.5016329051  | 0.4713161117  | C | -0.101424063   | 3.5313318192  | 9.1689918396  |
| C | 7.1642706587  | 2.9950609171  | 0.408428084   | C | -1.4852466324  | -1.869382052  | 3.3897676475  |
| S | 8.5640442459  | 0.8053420379  | 0.2328321666  | C | -2.171134006   | -2.769406185  | 4.2894945303  |
| H | 6.3306486175  | 3.6880615247  | 0.4426870849  | C | -1.1726178684  | -3.5069216447 | 5.0319723671  |
| S | 11.279950556  | 6.3787725206  | 0.7048724895  | C | 0.1302892554   | -3.0580013059 | 4.592616498   |
| C | 9.0386026094  | 4.7140488626  | 0.5979639505  | C | -0.0636221372  | -2.0482442768 | 3.5760307163  |
| C | 12.8267124707 | 5.5470598354  | 0.6309895198  | C | -1.5179206723  | 3.707781392   | 8.9789777299  |
| O | 8.2073033508  | 5.7960088469  | 0.6710256244  | C | -3.346898354   | 2.1891767104  | 9.4746969814  |

|   |                |               |               |   |               |               |               |
|---|----------------|---------------|---------------|---|---------------|---------------|---------------|
| O | 11.6326128298  | 1.3862152965  | 0.3248307903  | C | -1.455959509  | 0.6882536176  | 11.1617108565 |
| C | 7.8007655165   | 6.1161985105  | 1.9958373462  | C | 1.1089717658  | 1.6288021636  | 10.0576670029 |
| H | 7.1510473025   | 6.9899673836  | 1.9155605098  | C | 0.7563838215  | 3.5995067791  | 8.0677823722  |
| H | 7.2451807876   | 5.2866771754  | 2.4511778812  | C | -1.9978487899 | -0.5922207855 | 3.1693037236  |
| H | 8.6643935557   | 6.3603252369  | 2.6267707743  | C | -3.3400508177 | -2.3558855476 | 4.9243665294  |
| C | 11.9982986021  | 0.8370405679  | 1.5844100807  | C | -1.3864426722 | -3.8000682571 | 6.3758930922  |
| H | 12.6493146921  | -0.0135909871 | 1.3724833891  | C | 1.1626234111  | -2.9210569444 | 5.5173849936  |
| H | 12.5405056547  | 1.5712645315  | 2.1936555912  | C | 0.783568044   | -0.9409665798 | 3.533516791   |
| H | 11.1160202255  | 0.4919514212  | 2.1376022119  | C | -2.02498234   | 3.947930512   | 7.6994845778  |
| S | 0.4698706363   | -3.3885697919 | 0.0365219908  | C | -3.5604671607 | 0.7788031084  | 9.7797836686  |
| C | -0.9777395484  | 0.0930850882  | -0.404749362  | C | -0.3351430265 | -0.2219690722 | 10.8131570247 |
| C | 1.199511756    | 1.2427482828  | -0.3051910273 | C | 1.9782387826  | 1.6731544104  | 8.9117845739  |
| C | -0.2016725011  | 1.2395997797  | -0.4389388404 | C | 0.2251829829  | 3.8241001481  | 6.7452640962  |
| H | 1.6971604355   | 2.2079978247  | -0.3479747436 | C | -3.2023041502 | -0.1674050081 | 3.8365710502  |
| H | -0.6866092098  | 2.2027376927  | -0.5747682638 | C | -3.5518825771 | -2.6547194294 | 6.3194043315  |
| C | -0.2386123928  | -1.1273611816 | -0.2309248165 | C | -0.3145517144 | -3.6508605575 | 7.3309275365  |
| C | 1.2070289049   | -1.1248342705 | -0.0958529015 | C | 2.0302185412  | -1.7695648876 | 5.4714974629  |
| C | 1.9606941843   | 0.0991354128  | -0.1285910314 | C | 0.2458305297  | 0.3773636424  | 3.3070666496  |
| N | 1.7147301486   | -2.3476344081 | 0.0579754011  | C | -1.1161186901 | 0.5474812814  | 3.1302524147  |
| N | -0.761708431   | -2.352374795  | -0.1721670149 | C | -3.8606890105 | -1.029880503  | 4.6960823019  |
| C | 7.0154870161   | 1.6399225784  | 0.2904573508  | C | -2.597113961  | -3.3650840246 | 7.0296641478  |
| C | 3.4027893112   | 0.1332190674  | 0.0095889579  | C | 0.9328794387  | -3.2182236185 | 6.9101983633  |
| C | 4.2984166494   | -0.9116818354 | 0.1303901436  | C | 1.8438555818  | -0.8006089758 | 4.500182945   |
| C | 5.6393015961   | -0.4939662699 | 0.2357945172  | C | -1.1363326257 | 3.9949263556  | 6.5647058551  |
| C | 5.7969135932   | 0.8757444226  | 0.200968657   | C | -3.854319535  | 2.4053140362  | 8.1445589773  |
| S | 4.2560651124   | 1.6555109397  | 0.0282941746  | C | -2.6274054973 | 0.0659256575  | 10.4973392813 |
| H | 3.9790786674   | -1.9451094893 | 0.1435619676  | C | 0.888340386   | 0.2194723166  | 10.3618286002 |
| H | 6.473337087    | -1.1795164714 | 0.3451174574  | C | 1.8165460545  | 2.6476230401  | 7.9386721002  |
| C | -10.3240380282 | 3.7720036645  | -1.0496740706 | C | -3.2161037222 | 3.2787200395  | 7.2759615445  |
| C | -9.426315138   | 4.8723647949  | -1.0976353834 | C | -4.2058967764 | 0.1678210475  | 8.6426371507  |
| C | -7.5396241517  | 3.4102301402  | -0.9735193971 | C | -0.873652453  | -1.4318690319 | 10.2564498226 |
| C | -8.4372388764  | 2.3092239193  | -0.9343666967 | C | 2.3107356894  | 0.3259722705  | 8.52372913    |
| C | -9.8147962186  | 2.4656104619  | -0.9824244832 | C | 0.9782025198  | 3.0278930071  | 5.8056633413  |
| C | -11.6848290141 | 4.1970298634  | -1.0723949264 | C | -3.0697984505 | 1.2290990812  | 4.1829568633  |
| H | -12.5200939438 | 3.5069679794  | -1.0217416383 | C | -4.2181645659 | -1.531416406  | 6.9347519604  |
| C | -6.1797567421  | 2.9884486323  | -0.8947881104 | C | -0.8658986901 | -3.1460245055 | 8.5643579899  |
| S | -7.584232396   | 0.7970472798  | -0.7999617307 | C | 2.3477794917  | -1.3771916286 | 6.8247014887  |
| H | -5.3453582931  | 3.6813714514  | -0.8884063553 | C | 0.9875623398  | 1.3241522074  | 4.1089012443  |
| S | -10.2797508663 | 6.3885508601  | -1.1681350458 | C | -1.7849549193 | 1.6726455719  | 3.7433802402  |
| C | -8.0485300451  | 4.7148953818  | -1.0729866804 | C | -4.4078681137 | -0.5291093666 | 5.9352710934  |
| C | -11.8305062814 | 5.5566377283  | -1.1395462121 | C | -2.2720930847 | -2.9699987821 | 8.3781664618  |
| O | -7.2176484629  | 5.7992641424  | -1.1036473144 | C | 1.6721941561  | -2.2710520885 | 7.7100675531  |
| O | -10.6499911559 | 1.3853631653  | -0.9264933905 | C | 1.9706149399  | 0.5963861345  | 4.8463990724  |
| C | -6.7668009532  | 6.1371549391  | -2.4095691945 | C | -1.7950059604 | 3.3769968277  | 5.4390223046  |

|   |                |               |               |   |               |               |               |
|---|----------------|---------------|---------------|---|---------------|---------------|---------------|
| H | -6.1209821928  | 7.0100937216  | -2.2956923665 | C | -4.3937337187 | 1.1674450721  | 7.641219327   |
| H | -6.195294662   | 5.3143014491  | -2.8571605219 | C | -2.2764428484 | -1.2551230895 | 10.0664332259 |
| H | -7.6089475959  | 6.3890458018  | -3.0660238364 | C | 1.6359902352  | -0.5654823715 | 9.4102128916  |
| C | -11.0056539467 | 0.8726918209  | -2.2045633319 | C | 1.9598659038  | 2.2986927958  | 6.5433281075  |
| H | -11.6626639388 | 0.0199412683  | -2.0221693371 | C | -3.0784723745 | 2.9305699452  | 5.8798585984  |
| H | -11.5384224493 | 1.6258615552  | -2.7986872188 | C | -3.9800091416 | -1.1842665085 | 8.2871723017  |
| H | -10.1192562319 | 0.5386062345  | -2.7578839484 | C | -0.1234313697 | -2.2831494693 | 9.4048177888  |
| C | -6.0340426825  | 1.6301725802  | -0.8051549172 | C | 2.557677865   | -0.0205380756 | 7.171884474   |
| C | -2.4221270703  | 0.1237440325  | -0.5183622628 | C | 0.3745806068  | 2.4815671171  | 4.6451353003  |
| C | -3.3232211548  | -0.9224833773 | -0.5669752579 | C | -1.0664852491 | 2.6625843898  | 4.4549810284  |
| C | -4.6643151297  | -0.5052818559 | -0.6731288315 | C | -4.3627394816 | 0.8481602735  | 6.2606513961  |
| C | -4.8174666385  | 0.8651504025  | -0.7043042249 | C | -2.9706746184 | -1.9263394725 | 9.0279536403  |
| S | -3.2711172059  | 1.6462504262  | -0.5955439467 | C | 1.1892545496  | -1.8332631292 | 8.9674120216  |
| H | -3.0081959025  | -1.9564776249 | -0.525495396  | C | 2.3686469917  | 1.0040852232  | 6.1428520232  |
| H | -5.5021864997  | -1.1927212039 | -0.7282175693 | C | -3.6740972512 | 1.7626248126  | 5.3469237304  |
| S | -18.3683524879 | 10.6018786748 | -1.4320233458 | C | -1.5360553519 | 1.7614733122  | 12.2255805865 |
| C | -19.8450018083 | 7.1334824564  | -0.9779644752 | C | -2.9252448423 | 2.0794305858  | 12.7308143318 |
| C | -17.668584734  | 5.9781314844  | -0.9492479626 | C | -0.5809608843 | 1.8638178862  | 13.4238104317 |
| C | -19.0749590134 | 5.985855816   | -0.8897917434 | C | -3.3759548556 | 3.4003194339  | 12.7720276457 |
| H | -17.1766378235 | 5.0127735597  | -0.8637533131 | C | -3.727442381  | 1.0734991314  | 13.2731574226 |
| H | -19.5692571135 | 5.0253343739  | -0.7700040166 | H | -0.7408700159 | 2.8722613018  | 13.8315674877 |
| C | -19.0949778243 | 8.3479072805  | -1.1483482423 | H | -0.9934315386 | 1.1818192089  | 14.180970777  |
| C | -17.6443361481 | 8.339906711   | -1.2111324634 | C | 0.9197809655  | 1.617480468   | 13.3178780866 |
| C | -16.8959534978 | 7.116760817   | -1.106444573  | C | -4.6117458598 | 3.7089458368  | 13.3333402873 |
| N | -17.1264344233 | 9.5579265526  | -1.3703621977 | H | -2.7571136773 | 4.1914099109  | 12.3552951556 |
| N | -19.6115949072 | 9.5716649722  | -1.2615640453 | C | -4.9634108507 | 1.379836757   | 13.8349029608 |
| C | -15.4483436012 | 7.0772807345  | -1.1584020054 | H | -3.3837864184 | 0.0420833695  | 13.2490320254 |
| C | -14.5436110944 | 8.1144276237  | -1.2782464908 | H | 1.1334044807  | 0.6060202091  | 12.9628629564 |
| C | -13.2000953068 | 7.6916347318  | -1.2839637775 | H | 1.3880282915  | 2.3021899365  | 12.605974971  |
| C | -13.0485445473 | 6.3253908321  | -1.1697091437 | C | 1.5711598968  | 1.8067932827  | 14.681569584  |
| S | -14.6000669422 | 5.5555998065  | -1.0523897794 | C | -5.4095444292 | 2.6986621451  | 13.8640485742 |
| H | -14.8579482881 | 9.1464085679  | -1.3583093667 | H | -4.9522852695 | 4.7406069507  | 13.3525759901 |
| H | -12.3590374071 | 8.3717726302  | -1.3712686813 | H | -5.5796315188 | 0.5857256052  | 14.2476245542 |
| C | -29.1913724755 | 3.5775212721  | 0.1718910546  | H | 1.3999527646  | 2.8192989645  | 15.071274029  |
| C | -28.310365764  | 2.4629103701  | 0.146972551   | H | 1.1387142853  | 1.1292697985  | 15.4303602604 |
| C | -26.4174156171 | 3.8939701437  | -0.1394672808 | C | 3.0605715194  | 1.5677106489  | 14.6453292664 |
| C | -27.2981441442 | 5.0088301555  | -0.1108509283 | H | -6.3763334669 | 2.9381846655  | 14.2981990334 |
| C | -28.6690776454 | 4.8750503086  | 0.0527677104  | O | 3.6984655769  | 1.251978806   | 13.6690464543 |
| C | -30.5523804458 | 3.1743011421  | 0.3092781424  | O | 3.6053786019  | 1.751611783   | 15.8597050066 |
| H | -31.3798307681 | 3.8755448683  | 0.3101357191  | C | 5.0140785308  | 1.5441733569  | 15.9222936312 |
| C | -25.0624610235 | 4.2939439409  | -0.3346051985 | H | 5.2665484524  | 0.5196243074  | 15.6356168847 |
| S | -26.4352424374 | 6.5076913205  | -0.3133565228 | H | 5.5361792402  | 2.2341845153  | 15.2537846131 |
| H | -24.2440969968 | 3.5877527356  | -0.4237876386 | H | 5.2947574549  | 1.7309203911  | 16.9591455681 |



**Table S22.** The coordinate of 5/PC<sub>71</sub>BM (338 atoms).

| Atom | Coordinates (Angstroms) |               |               | Atom | Coordinates (Angstroms) |               |               |
|------|-------------------------|---------------|---------------|------|-------------------------|---------------|---------------|
|      | X                       | Y             | Z             |      | X                       | Y             | Z             |
| C    | 16.6719037434           | 8.3300225701  | 2.992036974   | H    | -26.111105432           | 7.6154491215  | 1.7434400236  |
| C    | 19.0978228176           | 8.8286460005  | 2.5197402673  | H    | -26.3330162945          | 7.612942935   | -0.0310117226 |
| C    | 17.8863575384           | 8.1454855923  | 2.3081513564  | H    | -27.7129744594          | 7.9839086939  | 1.0440930549  |
| C    | 15.4735560735           | 7.5461021883  | 2.5654699935  | C    | -31.1390236968          | 5.0387708778  | -3.7140461669 |
| C    | 14.394257159            | 7.4391312831  | 3.451206903   | H    | -31.8050216662          | 4.520479289   | -4.4066164072 |
| C    | 13.2529566773           | 6.7326117534  | 3.1057086234  | H    | -31.695884559           | 5.8237967329  | -3.186968829  |
| C    | 13.138940441            | 6.1169011384  | 1.8504041666  | H    | -30.3144101516          | 5.496004367   | -4.274495782  |
| C    | 14.2104042955           | 6.2469797147  | 0.9532323425  | C    | -26.0529064384          | 4.4100021572  | -2.8618537945 |
| C    | 15.3559762398           | 6.9420571842  | 1.3066179421  | C    | -22.4529101218          | 4.0900805351  | -4.4383007757 |
| H    | 17.8902628363           | 7.3991298639  | 1.5265197045  | C    | -23.3597909402          | 3.5500807154  | -5.3135889875 |
| H    | 14.4690858931           | 7.9246183084  | 4.418754105   | C    | -24.6953115445          | 3.6087856136  | -4.8536246765 |
| H    | 12.4420242079           | 6.6437454863  | 3.8244018131  | C    | -24.8474835246          | 4.1838553685  | -3.616719103  |
| H    | 14.1261296568           | 5.8272662191  | -0.044929845  | S    | -23.2876468827          | 4.6793745429  | -3.0274514111 |
| H    | 16.1460739989           | 7.0505530185  | 0.570183271   | S    | -38.3816584807          | 8.6818573274  | 4.5690172827  |
| C    | 20.2952033875           | 8.4426019629  | 1.711247989   | C    | -39.6464400958          | 5.525674325   | 2.9102361373  |
| C    | 20.4364538599           | 7.1846033199  | 1.1130563982  | C    | -37.4270660904          | 4.7054843535  | 2.2484990094  |
| C    | 21.330230578            | 9.3751259786  | 1.5685030168  | C    | -38.8350059974          | 4.5853456127  | 2.3058836639  |
| C    | 21.5742606566           | 6.8751647402  | 0.3757306084  | H    | -36.8651437364          | 3.9086162584  | 1.768808481   |
| H    | 19.6705139224           | 6.4268235234  | 1.24812307    | H    | -39.2933880738          | 3.7172800129  | 1.8399213443  |
| C    | 22.4622439535           | 9.0694336034  | 0.8231017876  | C    | -38.978811737           | 6.6521328135  | 3.4916084656  |
| H    | 21.2295987877           | 10.3387560369 | 2.0575730132  | C    | -37.5410831633          | 6.7845779735  | 3.4156178669  |
| C    | 22.586967137            | 7.8188626339  | 0.2213171663  | C    | -36.7411516066          | 5.7777865091  | 2.7844426684  |
| H    | 21.6730123242           | 5.8907982361  | -0.0739186842 | N    | -37.0850149458          | 7.9040598745  | 3.9771569912  |
| H    | 23.2522723744           | 9.8077036813  | 0.7143202014  | N    | -39.5664660599          | 7.6587665919  | 4.1381222368  |
| H    | 23.4738371137           | 7.5771370478  | -0.3584283307 | C    | -35.2956476802          | 5.8975924735  | 2.6858185177  |
| O    | 16.4745648873           | 9.0911532176  | 3.9928645863  | C    | -34.3809113362          | 6.3328506545  | 3.6099183575  |
| O    | 19.289293777            | 9.8007372999  | 3.317350598   | C    | -33.0430913548          | 6.2682461301  | 3.1567930924  |
| Ir   | 17.8732106782           | 10.5405906984 | 4.7658450739  | C    | -32.8953700891          | 5.776871804   | 1.883869414   |
| C    | 19.2491936084           | 11.753466809  | 5.5218257353  | S    | -34.4661128362          | 5.4067656982  | 1.2348007446  |
| C    | 19.4616000835           | 13.0963622367 | 5.1984580339  | C    | -48.5792622288          | 0.9313214325  | 3.653277518   |
| C    | 20.1158987857           | 11.1330734829 | 6.4660536045  | C    | -47.5633274168          | -0.0561812675 | 3.7603554567  |
| C    | 20.5093972015           | 13.7882949357 | 5.783774588   | C    | -45.8560451558          | 1.6029527948  | 3.5499608097  |
| H    | 18.8233820973           | 13.6184691314 | 4.4932726995  | C    | -46.8711603831          | 2.5906751815  | 3.4470145702  |
| C    | 21.157161686            | 11.8833911965 | 7.0212368322  | C    | -48.2228687222          | 2.2789891897  | 3.5062909307  |
| C    | 21.3788440288           | 13.2082217908 | 6.6990237508  | C    | -49.890380622           | 0.3505077983  | 3.7078906908  |
| H    | 22.1925365276           | 13.765951803  | 7.1459988806  | H    | -50.803140824           | 0.9282784648  | 3.6213933029  |
| C    | 19.8125027004           | 9.7438645429  | 6.7776033066  | C    | -44.552660102           | 2.1726561998  | 3.4434798939  |
| C    | 20.4859314417           | 8.9079736023  | 7.6777038337  | S    | -46.2010079942          | 4.18183876    | 3.2228756808  |
| C    | 20.0451232003           | 7.6095895258  | 7.8771452768  | H    | -43.645677277           | 1.578050296   | 3.4702023558  |
| H    | 21.3452464257           | 9.2883423095  | 8.2112970303  | S    | -48.2455185484          | -1.6518160157 | 3.9222579264  |
| C    | 18.3038329369           | 8.0090291256  | 6.3005484344  | C    | -46.210547009           | 0.2573636277  | 3.7225700763  |

|   |               |               |               |   |                |               |               |
|---|---------------|---------------|---------------|---|----------------|---------------|---------------|
| C | 18.9312136624 | 7.1453001805  | 7.1810425058  | O | -45.2560443547 | -0.7164239171 | 3.8116237237  |
| H | 20.5681244885 | 6.9629960157  | 8.5761100231  | O | -49.1742148463 | 3.252954967   | 3.3849934625  |
| H | 17.4297538682 | 7.7233639641  | 5.7254205792  | C | -44.8193244728 | -0.9688639464 | 5.1413474672  |
| H | 18.5525245634 | 6.1375926012  | 7.3123503557  | H | -44.072339661  | -1.7624095217 | 5.07464957    |
| C | 15.9212870845 | 12.5457718726 | 3.981349284   | H | -44.365160841  | -0.0738057256 | 5.5851256375  |
| C | 17.4468917757 | 12.1069723955 | 2.251561495   | H | -45.6501966291 | -1.3024905345 | 5.7752152817  |
| C | 15.2444762167 | 13.4496916637 | 3.1525020292  | C | -49.5915430598 | 3.8019679163  | 4.628458125   |
| C | 16.8165180216 | 12.9921721071 | 1.3948440878  | H | -50.3378174198 | 4.563583487   | 4.3937204832  |
| H | 18.3286220706 | 11.5448776131 | 1.963703423   | H | -50.0410394651 | 3.0329204204  | 5.2693944621  |
| C | 15.6921751574 | 13.6705839614 | 1.8599601425  | H | -48.7511671142 | 4.2666256237  | 5.158963894   |
| H | 14.3766957083 | 13.9690637834 | 3.5332907071  | C | -44.5665454135 | 3.5303921837  | 3.2739197322  |
| H | 17.2006884037 | 13.1401339768 | 0.3915442718  | C | -41.0898639799 | 5.3692638267  | 2.9801894576  |
| H | 15.166195966  | 14.3720652439 | 1.2185812466  | C | -42.0865962412 | 6.298665294   | 2.8288181692  |
| C | 15.6103446599 | 12.2126879835 | 5.3640014432  | C | -43.3884100069 | 5.753925381   | 2.9193481489  |
| C | 14.5584840052 | 12.7481500164 | 6.1138650419  | C | -43.4257622332 | 4.3988414893  | 3.1323417502  |
| C | 16.4808814465 | 11.2680771882 | 5.9780847451  | S | -41.7969743166 | 3.7988245626  | 3.2433942562  |
| C | 14.3297303601 | 12.4056421838 | 7.4324923767  | C | -49.855138913  | -0.9970998335 | 3.8528592427  |
| C | 16.2613148742 | 10.9242914882 | 7.3147775772  | H | -50.6992885591 | -1.6727526777 | 3.9113056078  |
| C | 15.2029848878 | 11.490423651  | 8.0066022615  | C | -0.0308613352  | 2.8495995879  | 9.2308002348  |
| H | 13.5077077582 | 12.8376312121 | 7.9898068885  | C | 1.267011982    | 2.5371907524  | 9.890251449   |
| H | 16.9019465364 | 10.2177218718 | 7.8320359936  | C | 2.2820029776   | 3.134524554   | 8.976475462   |
| N | 17.0132043982 | 11.8877168786 | 3.5003240783  | C | 1.6119222998   | 3.9869233853  | 8.0330237288  |
| N | 18.7309719143 | 9.2634459629  | 6.1022314317  | C | 0.2351493084   | -1.8014864348 | 2.6395421811  |
| F | 15.0020886692 | 11.1475397465 | 9.2857321038  | C | 0.0201972997   | -2.8044219553 | 3.6590168767  |
| F | 13.7131764505 | 13.6385050728 | 5.5605475551  | C | 1.313731157    | -3.2541255423 | 4.1246848362  |
| F | 21.9988368466 | 11.3238912128 | 7.911473934   | C | 2.3274786294   | -2.5243107253 | 3.3956445108  |
| F | 20.7034939352 | 15.0733552273 | 5.4605819364  | C | 1.6602766419   | -1.6282417647 | 2.4783551667  |
| C | 10.5221911621 | 3.8543692989  | 0.3943120769  | C | 0.1913911509   | 3.813275086   | 8.1921259422  |
| C | 9.5989206901  | 4.5282073788  | 1.2386999557  | C | -1.0461695037  | 1.9220066206  | 9.079148889   |
| C | 7.7876800355  | 3.228041499   | 0.3807159193  | C | 1.4952674482   | 0.9798342845  | 10.2323471711 |
| C | 8.7124375659  | 2.5413900263  | -0.4505130455 | C | 3.4201649886   | 2.4626078314  | 8.5652411674  |
| C | 10.0705104923 | 2.8286198717  | -0.4492647835 | C | 2.1411300355   | 4.2160197378  | 6.7600336481  |
| C | 11.8479572    | 4.3623376746  | 0.5493616155  | C | -0.6087338959  | -0.6930266346 | 2.5739023548  |
| H | 12.6960217725 | 3.9737031904  | -0.0027438389 | C | -1.0276992808  | -2.6578387168 | 4.5640376666  |
| C | 6.4543231136  | 2.7656255477  | 0.1805205677  | C | 1.5028305759   | -3.5392116399 | 5.4739025647  |
| S | 7.9218568944  | 1.3494778012  | -1.4445271343 | C | 3.4864890065   | -2.1107280401 | 4.0482787995  |
| H | 5.6013909966  | 3.1716921269  | 0.7139755206  | C | 2.1808999983   | -0.3539816444 | 2.2588057314  |
| S | 10.3865959507 | 5.7571484792  | 2.1862491937  | C | -0.648073978   | 3.8777606046  | 7.0770426517  |
| C | 8.2443962025  | 4.2269899363  | 1.2545400777  | C | -0.8352237181  | 0.513828023   | 9.396626326   |
| C | 11.9427525157 | 5.3708819046  | 1.4658311262  | C | 2.6860366847   | 0.3505883191  | 9.6050878384  |
| O | 7.3825424951  | 4.9135706825  | 2.0611000584  | C | 3.9547733214   | 2.6696853674  | 7.2454352159  |
| O | 10.9330670959 | 2.1610529247  | -1.2734727929 | C | 1.2729515115   | 4.2578428238  | 5.6089245213  |
| C | 7.0968947418  | 4.2583394722  | 3.2917511203  | C | -1.6865849087  | -0.5432528791 | 3.5196908394  |
| H | 6.4060831009  | 4.9076463999  | 3.8331591209  | C | -0.8236519442  | -2.9462329566 | 5.9625304019  |

|   |                |               |               |   |               |               |              |
|---|----------------|---------------|---------------|---|---------------|---------------|--------------|
| H | 6.6224374413   | 3.2834643505  | 3.12383131    | C | 2.7027365971  | -3.1025713889 | 6.1469245173 |
| H | 8.0090493645   | 4.1185418332  | 3.8848218343  | C | 4.0149674992  | -0.7877231681 | 3.8210230442 |
| C | 11.5117058579  | 1.0072345683  | -0.6764454415 | C | 1.3036415973  | 0.787603606   | 2.1958633017 |
| H | 12.1637267986  | 0.5637478419  | -1.4316785847 | C | -0.0620812599 | 0.6220034874  | 2.3500154923 |
| H | 12.1032693492  | 1.2747438531  | 0.2083099273  | C | -1.8912209448 | -1.5041112761 | 4.4949932601 |
| H | 10.7412573218  | 0.2812965253  | -0.3885080777 | C | 0.4142826509  | -3.3811033636 | 6.4080532392 |
| S | 0.0482439884   | -3.2692214939 | -0.9283970887 | C | 3.6728027134  | -2.4011695307 | 5.4487813762 |
| C | -1.5904902246  | 0.1321417476  | -1.1433030563 | C | 3.3746071903  | 0.0713850579  | 2.9442886555 |
| C | 0.4986768761   | 1.3784749219  | -1.4772467331 | C | -0.0925166283 | 4.0922425463  | 5.7636803818 |
| C | -0.907904181   | 1.3159479233  | -1.3407682595 | C | -1.8920823404 | 1.9607864964  | 7.9145904189 |
| H | 0.9555389417   | 2.3519238065  | -1.6335524425 | C | 0.3847838844  | 0.0717636098  | 9.8546901608 |
| H | -1.4678571969  | 2.2466112593  | -1.37374247   | C | 3.6239492851  | 1.0540027652  | 8.8831498038 |
| C | -0.7931672051  | -1.0567065387 | -1.0973400973 | C | 3.3374705744  | 3.5411296998  | 6.3607562783 |
| C | 0.6451858334   | -0.9911453742 | -1.2239998844 | C | -1.7088766502 | 2.9281205232  | 6.9372485982 |
| C | 1.309475727    | 0.2621799195  | -1.421193297  | C | -1.5657901174 | -0.2752506298 | 8.4338965671 |
| N | 1.2367439772   | -2.182149303  | -1.1306358845 | C | 2.3372720478  | -0.9727162737 | 9.1679214795 |
| N | -1.2525836583  | -2.2981327551 | -0.9420359785 | C | 4.4999740385  | 1.4272515348  | 6.7606999403 |
| C | 6.3600726377   | 1.7684835711  | -0.7520672403 | C | 1.949488935   | 3.6304826037  | 4.4991000676 |
| C | 2.7589723648   | 0.3556980232  | -1.4890279177 | C | -1.8136319245 | 0.8564517118  | 3.8557537104 |
| C | 3.6707853071   | -0.43796244   | -2.1356717897 | C | -1.5745036326 | -1.9913626317 | 6.7427641969 |
| C | 5.0102822609   | -0.0180315193 | -1.9618304845 | C | 2.3548518144  | -2.6975662035 | 7.4869137706 |
| C | 5.1574167492   | 1.1003120729  | -1.1797133619 | C | 4.5411061992  | -0.2804575371 | 5.0665374061 |
| S | 3.5899636969   | 1.6409845482  | -0.6613179927 | C | 1.9643979522  | 1.9147160801  | 2.8146553104 |
| C | -11.2490241014 | 2.3704070359  | -2.8918801069 | C | -0.8151541537 | 1.5767296779  | 3.1313684923 |
| C | -10.4430893324 | 3.2390697611  | -3.6758102219 | C | -2.2321908757 | -1.1020902455 | 5.839569668  |
| C | -8.4478261021  | 2.2439572631  | -2.8168819692 | C | 0.9451366074  | -2.8695824391 | 7.6475432961 |
| C | -9.2532405179  | 1.3737495036  | -2.033917503  | C | 4.3309745655  | -1.2759579429 | 6.0689063135 |
| C | -10.6401672153 | 1.4142602369  | -2.0642165941 | C | 3.2410165559  | 1.4707532931  | 3.2784151394 |
| C | -12.6382775683 | 2.6304561471  | -3.0768925496 | C | -0.830922036  | 3.2919838383  | 4.8164036738 |
| H | -13.4151312919 | 2.0903484534  | -2.5462688514 | C | -2.2217025581 | 0.6120149364  | 7.5288643144 |
| C | -7.0580496549  | 2.0138144897  | -2.6009104966 | C | 0.9296314023  | -1.1430070219 | 9.3240224533 |
| S | -8.2845601062  | 0.3064604149  | -1.0572568166 | C | 4.2902469068  | 0.434431126   | 7.7640614775 |
| H | -6.2815678631  | 2.5964545336  | -3.0849650689 | C | 3.2247422628  | 3.1847825624  | 4.9643431523 |
| S | -11.4082566681 | 4.3469595145  | -4.6085507743 | C | -1.8270662501 | 2.5698100236  | 5.5419200562 |
| C | -9.0567612262  | 3.1858244131  | -3.6601759642 | C | -1.1130322406 | -1.546772292  | 8.0057160346 |
| C | -12.8870586817 | 3.6437950424  | -3.9633528011 | C | 3.0458690177  | -1.6526382398 | 8.1441436325 |
| O | -8.3092816908  | 4.0473285113  | -4.4119014019 | C | 4.4950953763  | 1.0992404094  | 5.3820935756 |
| O | -11.3898416255 | 0.577472585   | -1.2870648744 | C | 1.2364776723  | 2.9116328095  | 3.5067153208 |
| C | -7.9711985129  | 3.5411633559  | -5.6979628365 | C | -0.2083217617 | 2.7356425263  | 3.6713074369 |
| H | -7.3854067227  | 4.3198355694  | -6.1902791471 | C | -2.444162768  | 0.2572377014  | 6.1746308273 |
| H | -7.3712749428  | 2.6258839489  | -5.6174679146 | C | 0.190896695   | -1.9982298398 | 8.4671713276 |
| H | -8.870212419   | 3.3317214544  | -6.2905487807 | C | 4.0692736259  | -0.9192565942 | 7.4144433951 |
| C | -11.7264502801 | -0.6490604604 | -1.924739295  | C | 3.8260953047  | 2.0106156249  | 4.4499254896 |
| H | -12.3097951166 | -1.2216615035 | -1.2010686406 | C | -2.2332259986 | 1.274127765   | 5.1423660297 |

|   |                |               |               |   |                |               |               |
|---|----------------|---------------|---------------|---|----------------|---------------|---------------|
| H | -12.328355771  | -0.4735488924 | -2.8253480397 | C | 1.4166048681   | 2.0429258388  | 11.3064180103 |
| H | -10.8269988507 | -1.2146962399 | -2.197089682  | C | 0.1533407007   | 2.041751532   | 12.1372519986 |
| C | -6.8070622577  | 1.0115562009  | -1.7028247681 | C | 2.5773091552   | 2.4165077386  | 12.2403947167 |
| C | -3.0382844625  | 0.0843641021  | -1.0189560689 | C | -0.5759817806  | 3.2197041764  | 12.3107038595 |
| C | -3.8242598183  | -0.6489173683 | -0.1682109982 | C | -0.2323717786  | 0.897395019   | 12.8379569088 |
| C | -5.2082722295  | -0.402217437  | -0.3218639126 | H | 2.2796560471   | 3.3704555266  | 12.6986332848 |
| C | -5.5170880158  | 0.5284163315  | -1.2822922227 | H | 2.5383606571   | 1.6832025832  | 13.0585438304 |
| S | -4.0461962824  | 1.0879108179  | -2.0227412179 | C | 4.020892696    | 2.5382681508  | 11.7661948819 |
| S | -19.7936323579 | 5.1099960391  | -7.9999731411 | C | -1.6785829791  | 3.2506099797  | 13.1595464155 |
| C | -21.0059442132 | 4.1893484988  | -4.5369570026 | H | -0.2813112492  | 4.1174514182  | 11.772385986  |
| C | -18.7702985099 | 4.1035619335  | -3.5222023238 | C | -1.3344968278  | 0.9261577015  | 13.6875164834 |
| C | -20.1778711529 | 3.9835687978  | -3.4508991324 | H | 0.3312801684   | -0.0239999427 | 12.7120819349 |
| H | -18.1964870889 | 3.9421209032  | -2.6136405399 | H | 4.3849842851   | 1.5962024635  | 11.3484774214 |
| H | -20.6199555076 | 3.7050063312  | -2.4981058245 | H | 4.1182001617   | 3.2868068051  | 10.9755989237 |
| C | -20.3579722846 | 4.5395043521  | -5.7656010629 | C | 4.9176202097   | 2.9371735835  | 12.9309377268 |
| C | -18.9182783435 | 4.64318951    | -5.8430248869 | C | -2.0615226824  | 2.1028481138  | 13.8487137771 |
| C | -18.1012624793 | 4.4293335331  | -4.6858043999 | H | -2.2402650948  | 4.1728951405  | 13.2800522638 |
| N | -18.4772587909 | 4.9450350512  | -7.0640986118 | H | -1.626568018   | 0.026360359   | 14.2220504701 |
| N | -20.9674777916 | 4.7992114766  | -6.9221990352 | H | 4.6030339645   | 3.8922065464  | 13.3723584105 |
| C | -16.6516277706 | 4.5182906663  | -4.7465900033 | H | 4.8620219769   | 2.2053287813  | 13.7484411792 |
| C | -15.8508872833 | 5.4165057812  | -5.4041774388 | C | 6.3646094828   | 3.065177709   | 12.52215581   |
| C | -14.4690026798 | 5.199822152   | -5.1990866912 | H | -2.9244215709  | 2.1249797806  | 14.5085848573 |
| C | -14.1738152252 | 4.1422878008  | -4.3754843467 | O | 6.8051261689   | 2.8429478057  | 11.4191613456 |
| S | -15.6574183505 | 3.3904745772  | -3.8663604517 | O | 7.1220377565   | 3.4629441748  | 13.5575623652 |
| C | -30.2541640968 | 5.0102562316  | -0.6312888745 | C | 8.509788431    | 3.6075830503  | 13.2656189883 |
| C | -29.326914215  | 5.4990990755  | 0.327804043   | H | 8.936652955    | 2.6556485841  | 12.9381122713 |
| C | -27.4957095657 | 5.0429706166  | -1.1383215915 | H | 8.6631535839   | 4.3505443805  | 12.4782232628 |
| C | -28.4234269377 | 4.5580471631  | -2.0989725299 | H | 8.9750164873   | 3.9349828048  | 14.1956543858 |
| C | -29.7922333839 | 4.542678812   | -1.8712345885 | F | -44.4690122773 | 6.5183643479  | 2.7852222969  |
| C | -31.5934641431 | 5.0689630294  | -0.1478184302 | F | -41.9061489713 | 7.5820248874  | 2.5587609426  |
| H | -32.443408241  | 4.7180947356  | -0.7232827019 | F | -34.6615315919 | 6.7275196757  | 4.8419133481  |
| C | -26.1523850991 | 4.9402812395  | -1.6035429142 | F | -32.030347121  | 6.6450498348  | 3.9328747297  |
| S | -27.6232482392 | 3.9906493519  | -3.5369969412 | F | -25.6990397871 | 3.121783221   | -5.5782625875 |
| H | -25.296958418  | 5.2339841203  | -1.0045693906 | F | -23.0628128694 | 2.9630162849  | -6.4622646552 |
| S | -30.1224072968 | 6.013398715   | 1.7882581921  | F | -16.2773178418 | 6.4425728565  | -6.1235900318 |
| C | -27.9599167191 | 5.5329939462  | 0.0922345312  | F | -13.5541717303 | 5.9861387621  | -5.7599330789 |
| C | -31.6918016448 | 5.5839200273  | 1.1168993328  | F | -6.1118910092  | -1.0251034856 | 0.4299514459  |
| O | -27.0908995996 | 5.9914348813  | 1.0412620442  | F | -3.3791525954  | -1.4748143381 | 0.7669159207  |
| O | -30.6598587794 | 4.053519797   | -2.8061698369 | F | 3.3753887287   | -1.4784423091 | -2.8998725423 |
| C | -26.8035673299 | 7.3807457252  | 0.9327257928  | F | 6.0224292575   | -0.6739365666 | -2.524164666  |

**Table S23.** The coordinate of 6/PC<sub>71</sub>BM (296 atoms).

| Atom | Coordinates (Angstroms) |               |               | Atom | Coordinates (Angstroms) |               |               |
|------|-------------------------|---------------|---------------|------|-------------------------|---------------|---------------|
|      | X                       | Y             | Z             |      | X                       | Y             | Z             |
| C    | 14.7719156545           | -0.2692975145 | 0.9254780422  | O    | -20.390883121           | 3.2180194932  | 1.134954442   |
| C    | 16.8447985584           | -1.699538214  | 0.9273946901  | O    | -20.101087838           | -2.2088102451 | -0.1922898934 |
| C    | 15.4555379652           | -1.4943966688 | 0.8441066881  | C    | -20.4787636913          | 3.4817037624  | 2.5297662722  |
| C    | 13.2845712844           | -0.2531104211 | 0.777121583   | H    | -20.5133545156          | 4.5677770527  | 2.6352340236  |
| C    | 12.587539893            | 0.8785506599  | 1.217985334   | H    | -21.3882308641          | 3.0429318195  | 2.9588673318  |
| C    | 11.2070992309           | 0.9501627398  | 1.1229504057  | H    | -19.6022874556          | 3.0908983356  | 3.0613326581  |
| C    | 10.4673014538           | -0.1042584278 | 0.5675793288  | C    | -19.8778706944          | -3.077524335  | 0.9113766219  |
| C    | 11.1689852198           | -1.2243746629 | 0.0952842508  | H    | -19.8613126011          | -4.0909972156 | 0.505705949   |
| C    | 12.5489061669           | -1.2989412456 | 0.2038084792  | H    | -18.9188922299          | -2.8629869309 | 1.3987870061  |
| H    | 14.8497366141           | -2.3764792745 | 0.6945320041  | H    | -20.6854884149          | -2.9921709841 | 1.649042182   |
| H    | 13.1540084335           | 1.7017653833  | 1.6407210298  | S    | -26.6315559595          | 3.9814683488  | 1.4766282355  |
| H    | 10.6912386168           | 1.828401411   | 1.502985853   | C    | -28.1697575982          | 0.632527392   | 0.5421289989  |
| H    | 10.6261583492           | -2.0309414247 | -0.3889560304 | C    | -25.9776154224          | -0.4967714061 | 0.2241902243  |
| H    | 13.0557388232           | -2.169222826  | -0.2014462859 | C    | -27.3840646422          | -0.4620794261 | 0.2344676603  |
| C    | 17.3764319061           | -3.0955344026 | 0.8498162851  | C    | -27.3883625478          | 1.7996029072  | 0.8662491813  |
| C    | 16.6027270274           | -4.2246117616 | 1.1448193455  | C    | -25.9345328758          | 1.7858164641  | 0.8649387806  |
| C    | 18.717476142            | -3.2758110423 | 0.4885078187  | C    | -25.1955897842          | 0.5970160641  | 0.5316162628  |
| C    | 17.1510664499           | -5.4999671573 | 1.0622654934  | N    | -25.4020112147          | 2.9597465841  | 1.1957177678  |
| H    | 15.5739535609           | -4.1117613538 | 1.4732188568  | N    | -27.8870231673          | 2.9899704145  | 1.1954985249  |
| C    | 19.2623404795           | -4.5505493088 | 0.3962462384  | C    | -31.8417973057          | 1.3369901994  | 0.7612819988  |
| H    | 19.3217319216           | -2.396884547  | 0.2881906272  | C    | -32.0429159881          | -0.0099967182 | 0.362190688   |
| C    | 18.4799067521           | -5.6679185782 | 0.6801646065  | C    | -34.4157497202          | 0.2507593794  | 0.4939240092  |
| H    | 16.5396971707           | -6.3652104367 | 1.3040984315  | C    | -34.213910385           | 1.6014241054  | 0.8872377375  |
| H    | 20.3023840741           | -4.6730978654 | 0.1059218479  | C    | -32.9500912203          | 2.1607734181  | 1.0149741092  |
| H    | 18.9059805385           | -6.6653803269 | 0.6123980608  | C    | -30.457560123           | 1.6616080477  | 0.8580185401  |
| O    | 15.2873032918           | 0.8700261914  | 1.1605025548  | H    | -30.0922073593          | 2.629734097   | 1.1704656395  |
| O    | 17.7373048169           | -0.7991705291 | 1.0271453427  | C    | -35.810591267           | -0.0826124258 | 0.4435358813  |
| Ir   | 17.3903905395           | 1.3082869772  | 1.3366000659  | S    | -35.7302126904          | 2.4108885546  | 1.1796522276  |
| C    | 19.3283817778           | 1.6130983707  | 1.6305077998  | H    | -36.1788406697          | -1.0685817942 | 0.185265988   |
| C    | 20.2735034078           | 2.0226136636  | 0.6858903873  | S    | -30.5348672527          | -0.836037372  | 0.1175323567  |
| C    | 19.7667811377           | 1.3337721864  | 2.9563208838  | C    | -33.3093488038          | -0.5624298288 | 0.2159495796  |
| C    | 21.6062812325           | 2.1336167742  | 1.0471128166  | C    | -29.6228424738          | 0.6200068869  | 0.5406421318  |
| H    | 19.9914371976           | 2.2579063024  | -0.3347722205 | O    | -33.4734798889          | -1.8695336404 | -0.1522361025 |
| C    | 21.1258149184           | 1.4625147494  | 3.2599727171  | O    | -32.8012204708          | 3.4593107827  | 1.4119556463  |
| C    | 22.0662560543           | 1.8576397876  | 2.3286532921  | C    | -33.5451496579          | -2.059924819  | -1.5588098286 |
| H    | 23.1126593997           | 1.9503368396  | 2.5920929329  | H    | -33.6631171407          | -3.1335993611 | -1.7192645953 |
| C    | 18.7223627848           | 0.9505141052  | 3.8947891078  | H    | -34.4054587828          | -1.5286800074 | -1.9858676326 |
| C    | 18.871155201            | 0.64633248    | 5.2541085165  | H    | -32.62818145            | -1.7166274263 | -2.0537620669 |
| C    | 17.7586802475           | 0.333068745   | 6.0180657221  | C    | -32.6019658492          | 4.3683733399  | 0.3373362176  |
| H    | 19.857690251            | 0.6629474009  | 5.6947505733  | H    | -32.5092123461          | 5.3593947093  | 0.7861979532  |
| C    | 16.4042697618           | 0.6281973594  | 4.0803422946  | H    | -31.6866366694          | 4.1318744963  | -0.2192165639 |

|   |               |               |               |   |                |               |               |
|---|---------------|---------------|---------------|---|----------------|---------------|---------------|
| C | 16.4969168483 | 0.3265587935  | 5.4276732267  | H | -33.4563141438 | 4.3573684133  | -0.3510004976 |
| H | 17.8761191126 | 0.0985800593  | 7.0722916492  | C | -36.6063242175 | 0.9636601278  | 0.7765225044  |
| H | 15.4576025724 | 0.6492073194  | 3.5518640303  | H | -37.6880694405 | 0.9744749383  | 0.8250429551  |
| H | 15.6009434372 | 0.0932138193  | 5.992382756   | F | -2.1828679836  | -2.354389094  | -0.3409857767 |
| C | 17.0306597849 | 3.0625125314  | -0.9531914766 | F | -14.9354864682 | 2.6607873743  | 0.8134721684  |
| C | 17.6176020913 | 0.8884178565  | -1.6176339766 | F | -27.9720411018 | -1.6217191968 | -0.0913397613 |
| C | 16.9462927858 | 3.4482670828  | -2.2972914631 | H | 0.2598872345   | -2.1508550267 | -0.2756065186 |
| C | 17.5518293827 | 1.2198924943  | -2.959502123  | H | -12.5128750087 | 2.3507918887  | 0.6591777518  |
| H | 17.8852816432 | -0.1047179214 | -1.273917269  | H | -25.5313091181 | -1.4486616257 | -0.0465389006 |
| C | 17.2052675265 | 2.5259871544  | -3.2984498962 | C | 1.2674233129   | 2.8205813832  | 10.8843501621 |
| H | 16.6817661731 | 4.4675081797  | -2.5402051982 | C | 2.5218185904   | 2.148598664   | 11.3220166927 |
| H | 17.7669473783 | 0.4702171867  | -3.7130358768 | C | 3.5231487321   | 2.5656901773  | 10.2997455388 |
| H | 17.1399880898 | 2.8270688265  | -4.3401811642 | C | 2.9684088347   | 3.6354285411  | 9.516579728   |
| C | 16.8236077346 | 3.898354949   | 0.2205196662  | C | -0.5148890213  | -1.1413186386 | 4.0834323099  |
| C | 16.4889369221 | 5.2560063062  | 0.204136336   | C | -0.8367635125  | -2.1520437747 | 5.0655346906  |
| C | 16.9997418169 | 3.2487560908  | 1.4753252493  | C | 0.3535854284   | -2.938469754  | 5.3051197185  |
| C | 16.3274576751 | 6.0007981353  | 1.356290792   | C | 1.4113903137   | -2.4089840632 | 4.4728223178  |
| C | 16.8478933098 | 3.998770244   | 2.6448369416  | C | 0.873376088    | -1.3000047007 | 3.718032121   |
| C | 16.5170196432 | 5.3416553625  | 2.5642692081  | C | 1.5834954418   | 3.7928782855  | 9.8783591467  |
| H | 16.068949022  | 7.0516361776  | 1.3135432693  | C | 0.0416828508   | 2.1807259947  | 10.8371631664 |
| H | 16.9821877021 | 3.5555253326  | 3.6259080257  | C | 2.3972891813   | 0.5575047806  | 11.5392982556 |
| N | 17.3614356998 | 1.7765965283  | -0.6476863999 | C | 4.3926380593   | 1.6812440065  | 9.6846610665  |
| N | 17.4793418672 | 0.923987397   | 3.3371073014  | C | 3.3641190985   | 3.8459539561  | 8.1929436497  |
| F | 16.3700866364 | 6.0456777526  | 3.6940252487  | C | -1.0554804349  | 0.1378047813  | 4.2064263766  |
| F | 16.3085531229 | 5.8977011834  | -0.9657712234 | C | -1.6848685687  | -1.841688713  | 6.1254879185  |
| F | 21.5728409116 | 1.1991589078  | 4.5028904478  | C | 0.6428032634   | -3.381726224  | 6.5922723424  |
| F | 22.5003292225 | 2.5224028304  | 0.1290319258  | C | 2.713644407    | -2.346997354  | 4.9639255367  |
| C | 6.7656940157  | -0.6949622931 | 0.3639897609  | C | 1.6616923873   | -0.1727647049 | 3.4928657202  |
| C | 6.6354022784  | 0.7199593985  | 0.3453014092  | C | 0.6463549274   | 4.1581243928  | 8.9086611953  |
| C | 4.2563195405  | 0.5536297881  | 0.2066700956  | C | -0.065607884   | 0.7403635179  | 11.0408508218 |
| C | 4.3859465835  | -0.8609593945 | 0.2328819842  | C | 3.2985748281   | -0.278565505  | 10.7050227987 |
| C | 5.6148566466  | -1.4978537785 | 0.3261388442  | C | 4.7819666921   | 1.8734080045  | 8.3128324993  |
| C | 8.1338899167  | -1.0973136082 | 0.4378501778  | C | 2.3886086739   | 4.1990761478  | 7.1902733311  |
| H | 8.4426185634  | -2.1357003127 | 0.4763381692  | C | -1.9244196627  | 0.4548197579  | 5.3119124172  |
| C | 2.8942731583  | 0.963048171   | 0.113707138   | C | -1.3748034378  | -2.2960528535 | 7.458948308   |
| S | 2.8347101623  | -1.6420088657 | 0.138759409   | C | 1.992347532    | -3.3086745822 | 7.0993827786  |
| H | 2.5799518753  | 1.9968404117  | 0.0684327573  | C | 3.5209884689   | -1.1733915258 | 4.7325385414  |
| S | 8.1878825543  | 1.502175003   | 0.4088139604  | C | 1.0980195049   | 1.1466305862  | 3.6243157944  |
| C | 5.4051416849  | 1.3580115624  | 0.2769812182  | C | -0.2329436867  | 1.299524148   | 3.9736738687  |
| C | 9.0097109274  | -0.0487734635 | 0.4785488755  | C | -2.2338562173  | -0.5136731243 | 6.2516448645  |
| C | 2.0107967005  | -0.0835324907 | 0.0777530132  | C | -0.2376383291  | -3.0537587443 | 7.6879838802  |
| O | 5.3291909583  | 2.7196027676  | 0.2444960728  | C | 3.0054152077   | -2.7993466529 | 6.3023123726  |
| O | 5.6995028782  | -2.8615743272 | 0.3535853072  | C | 3.0045632829   | -0.1098960968 | 4.0113298369  |
| C | 5.0670906993  | 3.3155020647  | 1.5107624075  | C | 1.0581366739   | 4.3518672622  | 7.5400876857  |

|   |                |               |               |   |               |               |               |
|---|----------------|---------------|---------------|---|---------------|---------------|---------------|
| H | 5.0615395157   | 4.3944551786  | 1.3449002137  | C | -0.9143402017 | 2.5263888681  | 9.8173663062  |
| H | 4.0943360469   | 2.9998609237  | 1.9066384681  | C | 1.0548557896  | -0.0203644728 | 11.2843933873 |
| H | 5.8502675727   | 3.0601597146  | 2.2352064594  | C | 4.2778680251  | 0.2421014988  | 9.8896882028  |
| C | 5.7160843099   | -3.4009469227 | 1.6704792919  | C | 4.2894339363  | 2.9431712233  | 7.5808205467  |
| H | 5.7561304612   | -4.486234874  | 1.5579596432  | C | -0.6266689531 | 3.5062109674  | 8.8783716039  |
| H | 6.5967450588   | -3.0566362045 | 2.2272543434  | C | -1.0912149573 | 0.239250707   | 10.1577666283 |
| H | 4.8109566727   | -3.1233571749 | 2.2249431506  | C | 2.5758974356  | -1.435423933  | 10.2542675979 |
| S | -0.9180338567  | 3.4231865404  | 0.4756542524  | C | 4.9290499182  | 0.5855794117  | 7.683263523   |
| C | -2.4090921011  | -0.0391754628 | -0.0160009495 | C | 2.7332015459  | 3.5307547752  | 5.9579530081  |
| C | -0.201803932   | -1.1767711158 | -0.1467106776 | C | -1.6539152737 | 1.8083524654  | 5.7386403629  |
| C | -1.6089073199  | -1.1564261878 | -0.1643296059 | C | -1.7529626299 | -1.2647713604 | 8.39543691    |
| C | -1.6454435506  | 1.1710577873  | 0.1551036729  | C | 1.9383141197  | -2.9557215301 | 8.4971264315  |
| C | -0.1926575456  | 1.1750844153  | 0.1662242492  | C | 4.3169737897  | -0.9217733186 | 5.9110277457  |
| C | 0.5626900914   | -0.0406635926 | 0.0193640687  | C | 2.0957035732  | 2.021520362   | 4.197621586   |
| N | 0.3239633065   | 2.3892023152  | 0.3392738487  | C | -0.6131668415 | 2.3318642801  | 4.9118069619  |
| N | -2.1602014975  | 2.3886007344  | 0.3190090988  | C | -2.2810864622 | -0.1654994766 | 7.6523438637  |
| C | -6.0852936381  | 0.6542877155  | 0.0958927921  | C | 0.5644612583  | -2.798667774  | 8.8591654901  |
| C | -6.2744545835  | -0.728639427  | -0.1635044942 | C | 3.9995247557  | -1.924800984  | 6.8769932037  |
| C | -8.6499950982  | -0.4688441572 | -0.079822604  | C | 3.2707004408  | 1.2443329     | 4.4393744605  |
| C | -8.4575191797  | 0.9169336171  | 0.1710480528  | C | 0.024009457   | 3.8411402823  | 6.6722050918  |
| C | -7.2011090147  | 1.4951518187  | 0.2513026375  | C | -1.6183489624 | 1.3360909764  | 9.4120726297  |
| C | -4.7061053794  | 0.9963876451  | 0.1715130851  | C | 1.2039451817  | -1.2769604043 | 10.6111820481 |
| H | -4.3484917543  | 1.9937093747  | 0.3848995873  | C | 4.6128786418  | -0.4148851885 | 8.6503069911  |
| C | -10.0318512987 | -0.8187901398 | -0.1043835367 | C | 3.9058862898  | 2.7518549216  | 6.2005434809  |
| S | -9.9739518514  | 1.7456815893  | 0.3648562678  | C | -1.0149501552 | 3.3149064442  | 7.4992446541  |
| H | -10.3932670551 | -1.8265152467 | -0.2596130123 | C | -1.0310097673 | -1.0594501056 | 9.5963510879  |
| S | -4.7590292871  | -1.5654587212 | -0.3063321975 | C | 2.9490647348  | -2.1690362794 | 9.098589506   |
| C | -7.5352212761  | -1.3024388873 | -0.2628577463 | C | 4.658707048   | 0.394549776   | 6.3056988161  |
| C | -3.8617651741  | -0.067627646  | -0.0286104555 | C | 1.7381306759  | 3.0962738648  | 5.0463972799  |
| C | -10.8681705301 | 0.2454056673  | 0.1110852154  | C | 0.3305916809  | 3.2574196555  | 5.4174648494  |
| O | -7.6831627308  | -2.6401449129 | -0.4923826603 | C | -2.0996871915 | 1.1688670422  | 8.0894661398  |
| O | -7.0655014858  | 2.8279208464  | 0.5146492436  | C | 0.1681423734  | -1.8496561656 | 9.8299140336  |
| C | -7.8238027071  | -2.9739763189 | -1.8677431361 | C | 4.0165582643  | -1.6390562616 | 8.264197644   |
| H | -7.9249300529  | -4.0601347073 | -1.9113797538 | C | 4.121370264   | 1.5196927454  | 5.5377130458  |
| H | -8.7172093236  | -2.5050243489 | -2.2987143434 | C | -1.7811649446 | 2.1953993897  | 7.095024024   |
| H | -6.9406532879  | -2.6661335573 | -2.4411115815 | C | 2.7304955426  | 1.5064488079  | 12.6699522741 |
| C | -6.827665556   | 3.6230861274  | -0.6403115412 | C | 1.628600227   | 1.7302846062  | 13.6810464648 |
| H | -6.7451375946  | 4.6541091384  | -0.2908986764 | C | 4.0608065892  | 1.507178092   | 13.437421886  |
| H | -5.8960424049  | 3.3306542849  | -1.139897167  | C | 1.2464066135  | 3.026334007   | 14.0324574799 |
| H | -7.6596835666  | 3.5433718706  | -1.3509912951 | C | 1.0656519474  | 0.6501405465  | 14.3636482729 |
| S | -13.9771305477 | -3.0748108727 | -0.5408780346 | H | 4.0823726251  | 2.4674724721  | 13.9722833178 |
| C | -15.2847796549 | 0.3943870789  | 0.3022032879  | H | 3.9418218017  | 0.7466509297  | 14.2221874654 |
| C | -13.0224994123 | 1.4139249097  | 0.4566745789  | C | 5.4114189615  | 1.2973846917  | 12.7625286    |
| C | -14.4270824141 | 1.4570427591  | 0.516389109   | C | 0.3092243941  | 3.2389420005  | 15.0394321745 |

|   |                |               |               |   |               |               |               |
|---|----------------|---------------|---------------|---|---------------|---------------|---------------|
| C | -14.5850139375 | -0.8284417476 | -0.002043401  | H | 1.6820325596  | 3.8744906585  | 13.5096666648 |
| C | -13.1344349815 | -0.8953042847 | -0.0720940921 | C | 0.1283440055  | 0.8604087986  | 15.3707540295 |
| C | -12.3168641359 | 0.2645977492  | 0.166443056   | H | 1.3592549694  | -0.3631302946 | 14.0996132282 |
| N | -12.6825310998 | -2.1108192459 | -0.3705376517 | H | 5.456122799   | 0.331195783   | 12.2534643508 |
| N | -15.1624116625 | -2.0032355066 | -0.2476948687 | H | 5.5997436086  | 2.0587800443  | 12.0012516509 |
| C | -18.9939900594 | -0.1140070742 | 0.3016129704  | C | 6.5247549203  | 1.3558051707  | 13.799996074  |
| C | -19.1008468475 | 1.259422419   | 0.6443229077  | C | -0.2535791145 | 2.1559808975  | 15.7097483572 |
| C | -21.4874842889 | 1.1245448558  | 0.6470622171  | H | 0.0170089239  | 4.2530035421  | 15.2981461563 |
| C | -21.3786901961 | -0.2527902592 | 0.313380694   | H | -0.3056371573 | 0.0098490498  | 15.8892627682 |
| C | -20.1580564586 | -0.8874979684 | 0.1476753248  | H | 6.5381825245  | 2.3219138858  | 14.3223023146 |
| C | -17.6376909881 | -0.5189381686 | 0.150757184   | H | 6.3811212208  | 0.6017274874  | 14.5858656334 |
| H | -17.3403895449 | -1.5187009064 | -0.132829434  | C | 7.8880769642  | 1.1363996354  | 13.1915115604 |
| C | -22.8462594558 | 1.5428834781  | 0.7511531391  | H | -0.9881388323 | 2.3210381179  | 16.4931235812 |
| S | -22.9449297008 | -0.9902175604 | 0.1420412044  | O | 8.1101686687  | 0.9215349757  | 12.0234199727 |
| H | -23.1461860419 | 2.5575131446  | 0.9757655777  | O | 8.8482078582  | 1.2085816701  | 14.1282819271 |
| S | -17.5408927513 | 2.0104687304  | 0.7741629572  | C | 10.1743352711 | 1.0105698318  | 13.644924853  |
| C | -20.3245161386 | 1.8893253     | 0.8277353478  | H | 10.2752858178 | 0.0219748417  | 13.188714044  |
| C | -16.732714992  | 0.4890982414  | 0.3756937343  | H | 10.43091472   | 1.7687453245  | 12.8999728277 |
| C | -23.746687329  | 0.5370160993  | 0.5172946085  | H | 10.8229117601 | 1.0971070092  | 14.5169864026 |

**Table S24.** The coordinate of 7/PC<sub>71</sub>BM (338 atoms).

| Atom | Coordinates (Angstroms) |              |               | Atom | Coordinates (Angstroms) |               |               |
|------|-------------------------|--------------|---------------|------|-------------------------|---------------|---------------|
|      | X                       | Y            | Z             |      | X                       | Y             | Z             |
| C    | 17.9099729055           | 8.3265204919 | 0.2398048023  | C    | -30.8513447547          | 1.5831618556  | -4.5356580326 |
| C    | 20.4144084139           | 8.1815157353 | -0.0026402319 | O    | -26.2416259402          | 1.3642499134  | -4.4324615147 |
| C    | 19.1182769032           | 7.6363437611 | 0.0406805241  | O    | -29.7244495057          | 5.6019108147  | -3.3348977741 |
| C    | 16.6251286559           | 7.5646078778 | 0.1933710856  | C    | -25.8224722117          | 0.6356131994  | -3.2849840791 |
| C    | 15.4840567016           | 8.1444745851 | 0.7612300471  | H    | -25.1599336428          | -0.153143911  | -3.6467513034 |
| C    | 14.2665745979           | 7.4820326596 | 0.7539737882  | H    | -25.2770230838          | 1.2792246236  | -2.5835506735 |
| C    | 14.1385829014           | 6.2164473973 | 0.1627476629  | H    | -26.6792422319          | 0.1851302808  | -2.7686074219 |
| C    | 15.2750193322           | 5.6505360326 | -0.435815712  | C    | -30.1770431826          | 5.6536652465  | -1.9874047706 |
| C    | 16.4941349135           | 6.3090973331 | -0.4148543278 | H    | -30.8307545638          | 6.5251788867  | -1.9157103128 |
| H    | 19.0449011574           | 6.5678357338 | -0.1030539815 | H    | -30.7406187772          | 4.7497862705  | -1.723841216  |
| H    | 15.5732975696           | 9.1278420387 | 1.2111571521  | H    | -29.3365723275          | 5.769228243   | -1.2919494694 |
| H    | 13.4046209566           | 7.9435059396 | 1.2294560852  | C    | -25.1086390269          | 5.4064949594  | -3.3057751889 |
| H    | 15.1901603074           | 4.6978902791 | -0.9505129779 | C    | -21.5185049788          | 6.8921835303  | -2.7718123088 |
| H    | 17.3405774319           | 5.8528233591 | -0.9185562981 | C    | -22.4245244215          | 7.9391762701  | -2.7833126786 |
| C    | 21.5791759607           | 7.2620441459 | -0.1890399692 | C    | -23.7575227968          | 7.5300642336  | -2.964775275  |
| C    | 21.5341279014           | 5.900192507  | 0.132970647   | C    | -23.8997904246          | 6.1643708419  | -3.098793922  |
| C    | 22.7743545807           | 7.7961171683 | -0.6865051711 | S    | -22.362267233           | 5.3760182279  | -2.9842281279 |
| C    | 22.6493536181           | 5.0910315056 | -0.0558606287 | H    | -22.1164413043          | 8.9691170598  | -2.6680969715 |
| H    | 20.6351655766           | 5.4703858971 | 0.564566036   | H    | -24.593838559           | 8.2197882083  | -3.013475497  |
| C    | 23.8850508055           | 6.9853107165 | -0.8852403959 | S    | -37.3226187502          | -3.2556135109 | -6.2685996939 |
| H    | 22.8138221725           | 8.8578911242 | -0.9076790144 | C    | -38.8652495543          | -0.0444731405 | -4.944191695  |



|    |               |               |               |   |                |               |               |
|----|---------------|---------------|---------------|---|----------------|---------------|---------------|
| C  | 23.8255242894 | 5.6286553184  | -0.5731440929 | C | -36.6780057634 | 1.0816773726  | -4.5857827157 |
| H  | 22.6012386577 | 4.0380722476  | 0.2084753035  | C | -38.0811099764 | 1.025964759   | -4.5539233103 |
| H  | 24.802055685  | 7.4137368413  | -1.2809159297 | H | -36.2343254275 | 2.0111668737  | -4.2421564451 |
| H  | 24.6949165696 | 4.9942639777  | -0.7239460927 | C | -38.0826027261 | -1.1590805024 | -5.4140527754 |
| O  | 17.7791031988 | 9.5647207311  | 0.5028301986  | C | -36.6298540504 | -1.1246983673 | -5.4549916967 |
| O  | 20.7185504433 | 9.4147700974  | 0.0586851089  | C | -35.8927944826 | 0.033839311   | -5.025102054  |
| Ir | 19.3591466679 | 11.0345300277 | 0.4938013262  | N | -36.0955318685 | -2.2521780669 | -5.9188595741 |
| C  | 20.875245058  | 12.3089959394 | 0.6095393417  | N | -38.5793136626 | -2.3150209744 | -5.8511248566 |
| C  | 21.3677320478 | 13.1297956245 | -0.4087417635 | C | -34.4466706618 | 0.1008797853  | -5.0460968028 |
| C  | 21.5254794444 | 12.3283732195 | 1.8761342746  | C | -33.5301448804 | -0.8318172915 | -5.4919195736 |
| C  | 22.475943833  | 13.9276591911 | -0.175612674  | C | -32.1921906357 | -0.4127359947 | -5.3590289264 |
| H  | 20.9031572008 | 13.1600931999 | -1.3885979311 | C | -32.0585830471 | 0.8461376219  | -4.8105356271 |
| C  | 22.6406107627 | 13.1540977854 | 2.0498797275  | S | -33.6180902979 | 1.5133223758  | -4.4442523282 |
| C  | 23.1380996545 | 13.9609953341 | 1.0451884993  | H | -33.8325622577 | -1.7850524961 | -5.9043851887 |
| H  | 24.0030064247 | 14.5919667641 | 1.2086958516  | H | -31.3426040229 | -1.0122343013 | -5.6691619646 |
| C  | 20.9384582702 | 11.4708981352 | 2.8952421141  | C | -48.3884002186 | 2.8332877185  | -3.3127786456 |
| C  | 21.3622517495 | 11.3141668254 | 4.221294939   | C | -47.5453722111 | 3.8309987218  | -2.7553157657 |
| C  | 20.6679304408 | 10.4707795206 | 5.0735362711  | C | -45.5881566445 | 2.6348659106  | -3.4303034431 |
| H  | 22.2294662726 | 11.8580602845 | 4.567736034   | C | -46.4322742199 | 1.6397705853  | -3.9922805673 |
| C  | 19.1754883862 | 9.97031927    | 3.2849402307  | C | -47.816532785  | 1.7246546423  | -3.9534988462 |
| C  | 19.550041958  | 9.7846522892  | 4.6040603646  | C | -49.7758549362 | 3.1381885874  | -3.1096454312 |
| H  | 20.9971820986 | 10.3515113744 | 6.1018915399  | H | -50.5833706514 | 2.4938689121  | -3.4373539712 |
| H  | 18.3163839736 | 9.4743429008  | 2.8467823878  | C | -44.2069867423 | 2.3077786637  | -3.5847451116 |
| H  | 18.977649015  | 9.1184511011  | 5.2401931105  | S | -45.5068075968 | 0.3442467448  | -4.6982509767 |
| C  | 17.9018516637 | 12.3109218581 | -1.673056289  | H | -43.4060729053 | 2.9232263807  | -3.1894914736 |
| C  | 19.4542542429 | 10.7457601065 | -2.4815467943 | S | -48.4754953012 | 5.100738009   | -2.006804722  |
| C  | 17.4881177397 | 12.575130476  | -2.9850080861 | C | -46.1588878302 | 3.7559682839  | -2.8118345261 |
| C  | 19.084710753  | 10.9733260975 | -3.7955045811 | O | -45.3796394062 | 4.7269998016  | -2.248578511  |
| H  | 20.2304484874 | 10.0404138222 | -2.2056586757 | O | -48.5936778118 | 0.7364914961  | -4.4920006932 |
| C  | 18.0791978479 | 11.9050152179 | -4.0440724114 | C | -44.9893822847 | 5.7463575065  | -3.1598388635 |
| H  | 16.7102490702 | 13.3050399818 | -3.1579599293 | H | -44.3824962153 | 6.4529369828  | -2.5900945679 |
| H  | 19.5747157853 | 10.4314921829 | -4.5970054606 | H | -44.39451059   | 5.3341346654  | -3.9846361388 |
| H  | 17.7575449063 | 12.1117929535 | -5.0608829699 | H | -45.8641427127 | 6.2652836661  | -3.5712105583 |
| C  | 17.4178376719 | 12.9357166237 | -0.4506542439 | C | -48.9932879947 | 0.9922166194  | -5.8318466108 |
| C  | 16.4286547713 | 13.9214350107 | -0.3769659257 | H | -49.5934978575 | 0.1349090069  | -6.1435510447 |
| C  | 18.0370468815 | 12.491523533  | 0.7522790208  | H | -49.5975386115 | 1.9059095775  | -5.898149856  |
| C  | 16.0288468716 | 14.4923528965 | 0.8156996209  | H | -48.1233578666 | 1.0882541666  | -6.4934913419 |
| C  | 17.644491974  | 13.0721790276 | 1.9613428804  | C | -43.9972588761 | 1.1254234307  | -4.2399266452 |
| C  | 16.659915303  | 14.0468361803 | 1.9702706223  | C | -40.3130113644 | -0.0553817081 | -4.8900270052 |
| H  | 15.2608906537 | 15.2555383103 | 0.8428084     | C | -41.1691107975 | -1.0767831473 | -5.2646826677 |
| H  | 18.0925780978 | 12.7786921962 | 2.9047629473  | C | -42.5289847085 | -0.7696685745 | -5.0803097598 |
| N  | 18.8810030257 | 11.3888739345 | -1.45551787   | C | -42.7427775656 | 0.4900544367  | -4.5601150412 |
| N  | 19.8469812938 | 10.7825622046 | 2.4574628927  | S | -41.2379314835 | 1.3083346668  | -4.305634201  |
| F  | 16.2913453059 | 14.5903808418 | 3.1374170569  | H | -40.8073073316 | -2.0174395605 | -5.6561196192 |

|   |               |               |               |   |                |               |               |
|---|---------------|---------------|---------------|---|----------------|---------------|---------------|
| F | 15.8183366928 | 14.356924408  | -1.4955106777 | H | -43.3343918715 | -1.4590890782 | -5.31157903   |
| F | 23.2820677713 | 13.190037849  | 3.2334317655  | C | -49.9586736175 | 4.3040230991  | -2.4415911031 |
| F | 22.9390118226 | 14.7049718781 | -1.1628923052 | H | -50.9005117138 | 4.754633569   | -2.1545615384 |
| C | 11.3015429864 | 3.7605172647  | 0.103089035   | F | -38.6792941624 | 2.1366120878  | -4.0960902887 |
| C | 10.440186035  | 4.8878549302  | 0.1772269383  | F | -19.7796589808 | 4.6394854397  | -2.7379696118 |
| C | 8.5078456693  | 3.4820988946  | 0.1009435752  | F | -0.8207615785  | 2.6876965793  | -0.8889510666 |
| C | 9.3707251066  | 2.3544577138  | 0.0415136728  | C | -2.4151148247  | 3.2374274509  | 9.6013855601  |
| C | 10.7527821314 | 2.470077575   | 0.0529386342  | C | -1.4270819863  | 2.6419305617  | 10.5426644686 |
| C | 12.6766947551 | 4.1447637853  | 0.0912112666  | C | -0.109220332   | 2.9566647158  | 9.9206905863  |
| H | 13.4888611883 | 3.4282481187  | 0.0479194293  | C | -0.309878714   | 3.919156641   | 8.8723498959  |
| C | 7.1335864323  | 3.1001141331  | 0.063589088   | C | -1.6798947033  | -1.5105372165 | 3.117250946   |
| S | 8.4707917557  | 0.867945895   | -0.0671406127 | C | -2.3661732738  | -2.4071044107 | 4.0202077665  |
| H | 6.3200438639  | 3.8169598005  | 0.089783625   | C | -1.3679649706  | -3.14002951   | 4.7676115416  |
| S | 11.3460756622 | 6.3734831069  | 0.2235049214  | C | -0.0648739109  | -2.6918263073 | 4.3280571812  |
| C | 9.0564453572  | 4.7707748304  | 0.1859692234  | C | -0.2584044196  | -1.6870855221 | 3.3064873617  |
| C | 12.8673764738 | 5.4958425986  | 0.1572500191  | C | -1.7262575275  | 4.0932757074  | 8.6794761804  |
| O | 8.2532521357  | 5.8746560809  | 0.2359678489  | C | -3.5543307576  | 2.5751482972  | 9.1798693747  |
| O | 11.5533667184 | 1.3644457361  | -0.0224589037 | C | -1.6641661503  | 1.0842814185  | 10.8766122313 |
| C | 7.9027618334  | 6.2689290998  | 1.5569852393  | C | 0.9012416789   | 2.0221378301  | 9.7717977569  |
| H | 7.2708143241  | 7.1534883762  | 1.4563216572  | C | 0.5493882106   | 3.9829964485  | 7.7720241954  |
| H | 7.3450959933  | 5.4761542612  | 2.0713930352  | C | -2.1936026276  | -0.2350506652 | 2.8897668452  |
| H | 8.7938222161  | 6.5221800013  | 2.1445717804  | C | -3.5362661754  | -1.9915831545 | 4.6514411211  |
| C | 11.9234446606 | 0.842050272   | 1.2473505019  | C | -1.5833691767  | -3.4268867675 | 6.1126014627  |
| H | 12.5474407403 | -0.0321723903 | 1.0508515529  | C | 0.9660166742   | -2.5493203025 | 5.2535759061  |
| H | 12.4950330274 | 1.5781700085  | 1.826649019   | C | 0.5879779202   | -0.5791713933 | 3.2596005672  |
| H | 11.0407157654 | 0.5378799649  | 1.8233568002  | C | -2.2317558133  | 4.3267966857  | 7.39813637    |
| S | 0.2892655563  | -3.1331669455 | -0.1764551298 | C | -3.7667960664  | 1.1660004464  | 9.4913518049  |
| C | -1.1009082659 | 0.3672463212  | -0.6790489545 | C | -0.5419787992  | 0.1735193124  | 10.5341213618 |
| C | 1.1236283175  | 1.4719784889  | -0.5716177875 | C | 1.7720036197   | 2.0619446008  | 8.6269596202  |
| C | -0.2740150345 | 1.4753863852  | -0.7116017694 | C | 0.0198743245   | 4.2008179665  | 6.4477224704  |
| H | 1.6063560432  | 2.4431461978  | -0.6234488791 | C | -3.3994427246  | 0.1918348793  | 3.5531529507  |
| C | -0.3727702714 | -0.8595215515 | -0.4809734917 | C | -3.749848769   | -2.2839833133 | 6.0475527937  |
| C | 1.0729137814  | -0.8881569567 | -0.3336321786 | C | -0.5129327748  | -3.2719100127 | 7.0684220192  |
| C | 1.8571359799  | 0.3176276719  | -0.3784533494 | C | 1.832507179    | -1.3971421339 | 5.2034184513  |
| N | 1.5536360497  | -2.1168717986 | -0.1593322444 | C | 0.0490631119   | 0.7376334629  | 3.0261414111  |
| N | -0.917825071  | -2.0729142089 | -0.4107678431 | C | -1.3130383055  | 0.9055581614  | 2.8466277428  |
| C | 6.9469216678  | 1.7468582579  | -0.0157951534 | C | -4.0579381068  | -0.6671651567 | 4.4160065604  |
| C | 3.2980072146  | 0.323629089   | -0.2377374339 | C | -2.795418309   | -2.9900580693 | 6.7625491198  |
| C | 4.1659020375  | -0.7380253261 | -0.0686339601 | C | 0.7347185768   | -2.8401645444 | 6.6474516588  |
| C | 5.5160418953  | -0.3500030621 | 0.0227129152  | C | 1.6466898522   | -0.4330056651 | 4.2271452625  |
| C | 5.7078878313  | 1.012912848   | -0.0725678075 | C | -1.3415514106  | 4.3692493571  | 6.2644055815  |
| S | 4.1886345946  | 1.823088394   | -0.2867477372 | C | -4.060073889   | 2.7843834133  | 7.8479791313  |
| H | 3.820200849   | -1.7614003279 | -0.0115288752 | C | -2.8339643949  | 0.4575738204  | 10.2135694037 |
| H | 6.3323967075  | -1.0501497224 | 0.1664939723  | C | 0.6817425961   | 0.6140583878  | 10.0825206113 |

|   |                |               |               |   |               |               |               |
|---|----------------|---------------|---------------|---|---------------|---------------|---------------|
| C | -10.4855282687 | 3.901666198   | -1.7223631762 | C | 1.6107282256  | 3.0316510553  | 7.6490157974  |
| C | -9.6298607281  | 5.0256452617  | -1.5700337012 | C | -3.4215607425 | 3.6542895727  | 6.9761345589  |
| C | -7.7112402894  | 3.6115518824  | -1.3880777158 | C | -4.4099672245 | 0.5489357604  | 8.3562293746  |
| C | -8.5668783757  | 2.4876916789  | -1.5469481175 | C | -1.0784138026 | -1.039625921  | 9.9824689952  |
| C | -9.937154615   | 2.60950989    | -1.7245957383 | C | 2.1065518133  | 0.7132761625  | 8.2458864993  |
| C | -11.8515511065 | 4.2890102244  | -1.8483043953 | C | 0.7749552086  | 3.4007866525  | 5.5130439592  |
| H | -12.6611788314 | 3.573756106   | -1.9458876849 | C | -3.2687916546 | 1.5901296001  | 3.8930317269  |
| C | -6.3523566639  | 3.2205055081  | -1.2007678929 | C | -4.4181122161 | -1.1584131674 | 6.6565029461  |
| S | -7.6759033805  | 0.9938538283  | -1.4734579734 | C | -1.0665371686 | -2.7618621595 | 8.2986437164  |
| H | -5.5511043893  | 3.9290753284  | -1.0211831453 | C | 2.1478195734  | -0.9979996987 | 6.5551255326  |
| S | -10.5271962928 | 6.5178174155  | -1.5899849924 | C | 0.7886802461  | 1.6891057656  | 3.8245141348  |
| C | -8.2568102309  | 4.9051507442  | -1.4151361399 | C | -1.983933706  | 2.0330642175  | 3.4531522718  |
| C | -12.0402228238 | 5.644219995   | -1.8011721844 | C | -4.6074659864 | -0.1611002242 | 5.6519574461  |
| O | -7.4730543263  | 6.0125579261  | -1.25445207   | C | -2.472651578  | -2.5881490616 | 8.1095826094  |
| O | -10.7325006244 | 1.5065968636  | -1.8593418044 | C | 1.4718900345  | -1.8883408698 | 7.4437903406  |
| C | -6.8683547375  | 6.4659629218  | -2.4594100394 | C | 1.7713935527  | 0.9657865761  | 4.566838737   |
| H | -6.2803831954  | 7.3472519877  | -2.1956452077 | C | -1.9979582734 | 3.7452649355  | 5.1407435457  |
| H | -6.2087900794  | 5.6998445405  | -2.8856512013 | C | -4.5974423075 | 1.5435569957  | 7.3497954671  |
| H | -7.6272149095  | 6.7413281861  | -3.2023353037 | C | -2.4810702572 | -0.8651611595 | 9.7895036247  |
| C | -10.9323789925 | 1.1087271015  | -3.2102462561 | C | 1.4314903618  | -0.1746547253 | 9.1356587102  |
| H | -11.5698276594 | 0.2228741285  | -3.1790095936 | C | 1.7563038431  | 2.6760973162  | 6.2556067814  |
| H | -11.4305422732 | 1.8992699208  | -3.7855877924 | C | -3.2815328156 | 3.2995722578  | 5.5819078311  |
| H | -9.9805195022  | 0.8566526387  | -3.6938539496 | C | -4.1822311106 | -0.8046106675 | 8.0075595494  |
| C | -6.1670838291  | 1.8642284879  | -1.2241735292 | C | -0.3261275485 | -1.8942272902 | 9.1360032783  |
| C | -2.5426529744  | 0.4227196343  | -0.8111539132 | C | 2.3557779802  | 0.3605467757  | 6.8960908067  |
| C | -3.4373209768  | -0.6339159939 | -0.7853828209 | C | 0.1735120412  | 2.8483596989  | 4.3543312211  |
| C | -4.7792215601  | -0.2401396713 | -0.9279479897 | C | -1.2674116299 | 3.0269797787  | 4.1611227894  |
| C | -4.9412024291  | 1.1233994491  | -1.0631847202 | C | -4.5641743603 | 1.2177481038  | 5.9708112146  |
| S | -3.4074384529  | 1.927033758   | -1.0218898199 | C | -3.1731920115 | -1.54208622   | 8.7533062624  |
| H | -3.1156025149  | -1.6584207302 | -0.6604930961 | C | 0.9867101853  | -1.4450526612 | 8.6983097075  |
| H | -5.6106582819  | -0.9374099707 | -0.9191865501 | C | 2.1671269646  | 1.3800448371  | 5.8619261993  |
| S | -18.7214759511 | 10.4907443752 | -2.211817501  | C | -3.8752448383 | 2.1285287878  | 5.0536590755  |
| C | -20.0805459532 | 6.9636910547  | -2.6083865878 | C | -1.7469592923 | 2.1623220996  | 11.9353989    |
| C | -17.8493277429 | 5.8807824143  | -2.4355676521 | C | -3.1373765651 | 2.480068678   | 12.437354524  |
| C | -19.2448545223 | 5.8617397353  | -2.5931569961 | C | -0.7937386822 | 2.2696555721  | 13.1346800717 |
| H | -17.3594581808 | 4.9118939478  | -2.4461428015 | C | -3.5908322153 | 3.8002334616  | 12.4715754185 |
| C | -19.3638585866 | 8.2021053963  | -2.4419030868 | C | -3.9380532796 | 1.4751572658  | 12.9837840187 |
| C | -17.9201114039 | 8.2466029892  | -2.2779308165 | H | -0.9642843569 | 3.2747860191  | 13.5461737573 |
| C | -17.1262329017 | 7.0463834709  | -2.2729918538 | H | -1.1996149608 | 1.5805342768  | 13.8889870277 |
| N | -17.4501781712 | 9.4842579752  | -2.1399750917 | C | 0.7097726567  | 2.0408288916  | 13.0285801728 |
| N | -19.9186574619 | 9.4127494107  | -2.4197709366 | C | -4.827893     | 4.1090123457  | 13.0299656152 |
| C | -15.6879193283 | 7.0531536735  | -2.1103534637 | H | -2.9731234758 | 4.590593117   | 12.0517843225 |
| C | -14.8295232293 | 8.1193610882  | -1.9224260554 | C | -5.1752550233 | 1.7816845935  | 13.542724343  |
| C | -13.4797520701 | 7.7384947817  | -1.7975715959 | H | -3.5922545406 | 0.4443402412  | 12.9651563852 |

|   |                |              |               |   |               |              |               |
|---|----------------|--------------|---------------|---|---------------|--------------|---------------|
| C | -13.2779367511 | 6.3763344392 | -1.8872189638 | H | 0.935826333   | 1.0329789457 | 12.6711499424 |
| S | -14.7885935029 | 5.5582719573 | -2.1337597276 | H | 1.1698865829  | 2.7330107791 | 12.3185528487 |
| H | -15.1813210676 | 9.1413481517 | -1.8768000209 | C | 1.3585070973  | 2.2346979847 | 14.3929101541 |
| H | -12.670507726  | 8.4441236903 | -1.6408286905 | C | -5.6241579477 | 3.099693942  | 13.5648298389 |
| C | -29.3711377583 | 3.300862276  | -3.9714931141 | H | -5.1706051945 | 5.1400361706 | 13.0437575329 |
| C | -28.4594852607 | 2.2449607516 | -4.2418467404 | H | -5.7902320786 | 0.9883631473 | 13.9587874116 |
| C | -26.5914619044 | 3.6664248729 | -3.7911234549 | H | 1.1744171944  | 3.2438889794 | 14.7852950686 |
| C | -27.5035087696 | 4.7216568583 | -3.5180319908 | H | 0.9345521267  | 1.5497137622 | 15.1397655315 |
| C | -28.8792101891 | 4.5591982732 | -3.5903994944 | C | 2.8508078966  | 2.0143932807 | 14.3561835621 |
| C | -30.7248974197 | 2.8913215979 | -4.1528123826 | H | -6.5918934316 | 3.3393542035 | 13.9967720324 |
| H | -31.5673315888 | 3.5638599471 | -4.0322163531 | O | 3.4923167826  | 1.7074047593 | 13.3794525313 |
| C | -25.2357469362 | 4.0920250927 | -3.6661653421 | O | 3.3935039974  | 2.2041809251 | 15.5705254357 |
| S | -26.6694643596 | 6.1931761525 | -3.1049851268 | C | 4.8047131469  | 2.0143817152 | 15.6328128254 |
| H | -24.3900608309 | 3.4461681646 | -3.8759827891 | H | 5.0699011347  | 0.9930364568 | 15.3461788768 |
| S | -29.2918365688 | 0.7852534021 | -4.6989933477 | H | 5.3179643026  | 2.7108331082 | 14.964137124  |
| C | -27.0843814254 | 2.4012195282 | -4.1478407519 | H | 5.0832497052  | 2.2046823373 | 16.6695891088 |

**Table S25.** The coordinate of 8/PC<sub>71</sub>BM (338 atoms).

| Atom | Coordinates (Angstroms) |              |              | Atom | Coordinates (Angstroms) |               |               |
|------|-------------------------|--------------|--------------|------|-------------------------|---------------|---------------|
|      | X                       | Y            | Z            |      | X                       | Y             | Z             |
| C    | 16.9277976335           | 7.5398221138 | 2.5423125952 | H    | -28.1913802811          | 2.916057951   | 1.2170319955  |
| C    | 19.432773773            | 7.7872628589 | 2.4243873505 | C    | -30.2289820414          | 5.2253180743  | -4.5735110397 |
| C    | 18.2220897192           | 7.1040283229 | 2.2093058805 | H    | -30.6797153395          | 5.5181543231  | -5.5237313642 |
| C    | 15.7587011877           | 6.6882281383 | 2.1670679836 | H    | -30.9748322657          | 5.3060332832  | -3.7725899409 |
| C    | 14.5382184278           | 6.9030081715 | 2.8187695155 | H    | -29.3863015043          | 5.8907994279  | -4.3495497698 |
| C    | 13.4197026662           | 6.1450728051 | 2.5096018405 | C    | -25.3535955646          | 3.8578667384  | -3.4540256441 |
| C    | 13.4734774171           | 5.1512043302 | 1.521062047  | C    | -21.5145843674          | 4.6615255752  | -3.8354825472 |
| C    | 14.6894077259           | 4.9570891568 | 0.8473727422 | C    | -22.1742670644          | 5.1521445571  | -4.9341953525 |
| C    | 15.8101460531           | 5.705961848  | 1.169084862  | C    | -23.5684073994          | 4.9289384112  | -4.9063589181 |
| H    | 18.297083984            | 6.1393825079 | 1.7279034517 | C    | -24.0118664698          | 4.2557702223  | -3.7956740868 |
| H    | 14.4856125855           | 7.6795792895 | 3.5748024437 | S    | -22.6580458634          | 3.8948065262  | -2.7677112237 |
| H    | 12.4933560407           | 6.3147422132 | 3.0528351248 | S    | -38.6324531696          | -2.598145176  | -0.7327329509 |
| H    | 14.7438736666           | 4.2330777137 | 0.0396757489 | C    | -39.7622605071          | 0.5784422883  | -2.4497388919 |
| H    | 16.7214703791           | 5.5490920199 | 0.6005014693 | C    | -37.5714732917          | 1.7146822385  | -2.2678930047 |
| C    | 20.7156168347           | 7.1256664958 | 2.0331290371 | C    | -38.9276387313          | 1.6568958024  | -2.6513615517 |
| C    | 20.8502786474           | 5.7374016634 | 1.9109809944 | H    | -37.039261311           | 2.6374515804  | -2.4770183391 |
| C    | 21.8365293327           | 7.9330300852 | 1.8031115084 | C    | -39.1439929978          | -0.5254673737 | -1.7755242077 |
| C    | 22.0695177311           | 5.1738149119 | 1.5504645865 | C    | -37.7510186185          | -0.4940046684 | -1.3855428797 |
| H    | 20.0093554586           | 5.0859837972 | 2.1293902624 | C    | -36.9433145289          | 0.6638361674  | -1.633596418  |
| C    | 23.0515719026           | 7.3704642857 | 1.4321239821 | N    | -37.3409178173          | -1.6178349632 | -0.8009445278 |
| H    | 21.7350615673           | 9.006481067  | 1.926891954  | N    | -39.7540586408          | -1.6616181503 | -1.4432612815 |
| C    | 23.1716885271           | 5.9883628516 | 1.3018390579 | C    | -35.5381890579          | 0.7196728711  | -1.2700086703 |
| H    | 22.1604345531           | 4.0939186311 | 1.4700015344 | C    | -34.8961796468          | 0.2603924804  | -0.1481338713 |
| H    | 23.9094127432           | 8.0117507651 | 1.2481356832 | C    | -33.510871878           | 0.5426113457  | -0.134013633  |

|    |               |               |               |   |                |               |               |
|----|---------------|---------------|---------------|---|----------------|---------------|---------------|
| H  | 24.1226882132 | 5.5467250469  | 1.0161870412  | C | -33.0572445991 | 1.2279464601  | -1.2334354602 |
| O  | 16.6255184877 | 8.5980120541  | 3.1813480715  | S | -34.3890029511 | 1.5073586265  | -2.316197437  |
| O  | 19.5648121947 | 8.962579751   | 2.8914616748  | C | -49.2857630871 | 3.5049342422  | -4.0214391537 |
| Ir | 17.9885619779 | 10.1817628535 | 3.7220867538  | C | -48.565833299  | 4.6195000264  | -3.5133921035 |
| C  | 19.3124007909 | 11.5387041923 | 4.3066604843  | C | -46.5494957163 | 3.3398703178  | -3.4162639822 |
| C  | 19.6971184214 | 12.6925673214 | 3.6186260528  | C | -47.268043448  | 2.2269301238  | -3.9279548446 |
| C  | 19.939182132  | 11.2440476433 | 5.5505666171  | C | -48.6185191886 | 2.2922973231  | -4.2431566357 |
| C  | 20.6820187942 | 13.5122028961 | 4.1451282848  | C | -50.6702476938 | 3.8192042393  | -4.2309870046 |
| H  | 19.2426906305 | 12.9682698738 | 2.6729408198  | H | -51.3972126217 | 3.1011395661  | -4.5920781071 |
| C  | 20.9281866618 | 12.1090919384 | 6.0295386936  | C | -45.1829413326 | 3.0159990122  | -3.1660965155 |
| C  | 21.3203656518 | 13.2460834654 | 5.3499807462  | S | -46.2522228709 | 0.8222413142  | -4.0866990982 |
| H  | 22.088312422  | 13.8992940268 | 5.7456089645  | H | -44.4746306406 | 3.7269068747  | -2.7541140294 |
| C  | 19.4629791169 | 10.0442104027 | 6.2231228993  | S | -49.6043067668 | 6.0047689882  | -3.3108743989 |
| C  | 19.888989354  | 9.5367933064  | 7.4572343503  | C | -47.2095437187 | 4.5609744143  | -3.2180628843 |
| C  | 19.3079042426 | 8.3882343077  | 7.9698807804  | O | -46.5468529102 | 5.6457700488  | -2.7165320327 |
| H  | 20.669095485  | 10.0513933749 | 7.9998050971  | O | -49.2811492892 | 1.1950328463  | -4.718198321  |
| C  | 17.9182412169 | 8.2860377689  | 6.0370203772  | C | -45.9699648463 | 6.4756486117  | -3.7168400605 |
| C  | 18.30016346   | 7.746793947   | 7.2529087436  | H | -45.4856746176 | 7.3007761536  | -3.1907185492 |
| H  | 19.6389729363 | 7.9964200128  | 8.9275078564  | H | -45.2231455882 | 5.9262325396  | -4.3040149712 |
| H  | 17.1402067349 | 7.8475736353  | 5.4217848019  | H | -46.7368566852 | 6.8741141872  | -4.3925489787 |
| H  | 17.8178052549 | 6.8480843436  | 7.6213593854  | C | -49.319060361  | 1.1208682628  | -6.137500624  |
| C  | 16.3955918902 | 11.8727644215 | 1.9757970894  | H | -49.8630050294 | 0.2067274424  | -6.383672578  |
| C  | 18.1576256883 | 10.8493095273 | 0.8096175828  | H | -49.8421824188 | 1.985551715   | -6.5652654833 |
| C  | 15.9625343164 | 12.4760303352 | 0.7881037101  | H | -48.3075411444 | 1.06761202    | -6.5589757306 |
| C  | 17.7735531386 | 11.4247216882 | -0.3888709711 | C | -44.8673945298 | 1.7211683051  | -3.4759249222 |
| H  | 19.0213373698 | 10.1991707662 | 0.8951209992  | C | -41.1528634942 | 0.5509507428  | -2.8690914502 |
| C  | 16.6512189837 | 12.2500459453 | -0.3927600098 | C | -41.8543279738 | -0.4928604052 | -3.4184226544 |
| H  | 15.0926125851 | 13.1168061445 | 0.8067098311  | C | -43.2113451497 | -0.1944204777 | -3.673241182  |
| H  | 18.3420799225 | 11.2264028316 | -1.2908323352 | C | -43.5831687058 | 1.0824090626  | -3.3354021648 |
| H  | 16.3142561019 | 12.7191395602 | -1.3128214916 | S | -42.2091148664 | 1.925061607   | -2.6869136434 |
| C  | 15.8162777749 | 12.0200281291 | 3.3031314885  | C | -50.9669525538 | 5.1007345565  | -3.9025602986 |
| C  | 14.7015457456 | 12.801538297  | 3.6227254177  | H | -51.933862559  | 5.5850353236  | -3.9579256814 |
| C  | 16.47622387   | 11.3057360319 | 4.3431921314  | F | -39.4093850668 | 2.7538173076  | -3.2480011609 |
| C  | 14.2142722168 | 12.9186382246 | 4.9100349939  | F | -19.9832765324 | 2.5703784401  | -2.6845841722 |
| C  | 15.9949071931 | 11.4281240136 | 5.6495018351  | F | -0.656744566   | 0.8354591302  | -3.1349026753 |
| C  | 14.8869663436 | 12.2197490066 | 5.9043933604  | C | -0.8907831473  | 5.4313567813  | 6.6826744349  |
| H  | 13.349502375  | 13.5328488076 | 5.1288158742  | C | 0.1581875984   | 5.1913774695  | 7.7118985095  |
| H  | 16.4686479655 | 10.9151663707 | 6.4797554102  | C | 1.4340907133   | 5.2889167076  | 6.9474537219  |
| N  | 17.4904376884 | 11.0620444502 | 1.9519143109  | C | 1.1570547879   | 5.8456189805  | 5.6515798178  |
| N  | 18.4811410124 | 9.3944736456  | 5.5371840804  | C | -0.363425587   | -1.2034288029 | 2.1173985255  |
| F  | 14.4347508384 | 12.3232794769 | 7.1608753719  | C | -0.9807002911  | -1.7519789588 | 3.3045436239  |
| F  | 14.0505853427 | 13.4832710872 | 2.6610058913  | C | 0.0720387653   | -2.1862168436 | 4.1965729133  |
| F  | 21.5457533208 | 11.8548708395 | 7.1991124237  | C | 1.3394509237   | -1.9009784893 | 3.5612436537  |
| F  | 21.0437728375 | 14.6120594951 | 3.4722026308  | C | 1.0695325427   | -1.2953657432 | 2.2766628298  |

|   |                |               |               |   |               |               |              |
|---|----------------|---------------|---------------|---|---------------|---------------|--------------|
| C | 10.9755476011  | 2.5776013985  | 0.4145718765  | C | -0.2711220537 | 5.9353770191  | 5.4912761701 |
| C | 9.976344561    | 3.5006474795  | 0.8264043974  | C | -2.0324047245 | 4.6583618625  | 6.569585098  |
| C | 8.243557899    | 2.0149069641  | 0.1216302122  | C | -0.02371437   | 3.8322297454  | 8.5589890145 |
| C | 9.2413243265   | 1.0852294625  | -0.2757764388 | C | 2.4591419666  | 4.3658995045  | 7.0626800027 |
| C | 10.5976486081  | 1.3400571042  | -0.1270182033 | C | 1.9583565496  | 5.544850334   | 4.5466526982 |
| C | 12.2906207318  | 3.0904283929  | 0.6315656214  | C | -0.9213351088 | -0.0808300007 | 1.5060232536 |
| H | 13.1876313907  | 2.532058815   | 0.3897356559  | C | -2.1273343144 | -1.1583083298 | 3.8260213564 |
| C | 6.9314112631   | 1.5283230915  | -0.1488393151 | C | -0.0679415548 | -2.0097502557 | 5.5700119774 |
| S | 8.5425565486   | -0.3545153654 | -0.9622690217 | C | 2.4120440761  | -1.4516593363 | 4.3272783522 |
| H | 6.0332338472   | 2.0934734096  | 0.0767883166  | C | 1.8837154636  | -0.2606764116 | 1.8179959451 |
| S | 10.6840914915  | 4.960238203   | 1.4570480587  | C | -0.846396338  | 5.7246609855  | 4.2356751213 |
| C | 8.6195349731   | 3.2373190274  | 0.6998112212  | C | -2.1936527654 | 3.4325451344  | 7.3434253752 |
| C | 12.3058905874  | 4.3400138352  | 1.1831956198  | C | 1.1024907458  | 2.8674295653  | 8.4755029169 |
| O | 7.6831957119   | 4.1538774847  | 1.0844708709  | C | 3.2699092075  | 4.0274923779  | 5.923005776  |
| O | 11.5344458652  | 0.43188088    | -0.5343028271 | C | 1.3573145334  | 5.3044493147  | 3.2574820128 |
| C | 7.2053559929   | 3.9660961574  | 2.4118724489  | C | -2.1029615782 | 0.534525878   | 2.0567671209 |
| H | 6.4691817097   | 4.7526305758  | 2.5887718064  | C | -2.2633818079 | -0.969472805  | 5.2496952112 |
| H | 6.7243826101   | 2.9865919314  | 2.5260321831  | C | 1.0451376616  | -1.5375610231 | 6.3587892547 |
| H | 8.0204589397   | 4.0558798292  | 3.1404251403  | C | 3.2463433288  | -0.3759165728 | 3.8484387873 |
| C | 11.9295575084  | -0.4762760117 | 0.4865431855  | C | 1.3004824797  | 0.8979880851  | 1.1900691513 |
| H | 12.6665634137  | -1.1440704237 | 0.0360189404  | C | -0.0729754039 | 0.9864383288  | 1.0371373855 |
| H | 12.3833919367  | 0.0541457701  | 1.3332227219  | C | -2.6936706885 | 0.0079052996  | 3.1926539415 |
| H | 11.0762494818  | -1.0646815675 | 0.8457951429  | C | -1.2565117344 | -1.3893326037 | 6.104078796  |
| S | 0.3291541692   | -4.3500111002 | -0.3663823572 | C | 2.258781009   | -1.2622929545 | 5.7490143604 |
| C | -0.9431675934  | -1.2882691923 | -2.1875305191 | C | 2.9862136467  | 0.2065124188  | 2.6194764319 |
| C | 1.2818197121   | -0.2270457388 | -2.4048218847 | C | -0.0155406556 | 5.3924328405  | 3.1050253196 |
| C | -0.1199417921  | -0.2477560248 | -2.5614583843 | C | -2.6098400364 | 4.4079029393  | 5.274389414  |
| H | 1.8070162589   | 0.6471864475  | -2.7767247551 | C | -1.2086385427 | 3.0124255475  | 8.20741851   |
| C | -0.2628713166  | -2.3791229485 | -1.5528798177 | C | 2.2906811871  | 3.1406245556  | 7.8357267429 |
| C | 1.1734657551   | -2.3800238003 | -1.3830790472 | C | 3.0361510441  | 4.6150154391  | 4.6886594148 |
| C | 1.9693712686   | -1.2774841797 | -1.8363048681 | C | -2.038995629  | 4.9419904935  | 4.1284352056 |
| N | 1.627144458    | -3.4444579981 | -0.7242929461 | C | -2.8765796683 | 2.4677186383  | 6.5158794751 |
| N | -0.8537264032  | -3.4451521026 | -1.0166590447 | C | 0.5698883297  | 1.5361521201  | 8.3892532916 |
| C | 6.921935537    | 0.2847748833  | -0.7201268523 | C | 3.6179147393  | 2.6311860221  | 5.994504265  |
| C | 3.4056756075   | -1.2338551925 | -1.628192121  | C | 2.0841216887  | 4.2439670178  | 2.6016395341 |
| C | 4.3464544515   | -2.2228363712 | -1.7618794306 | C | -1.9900823234 | 1.9672257343  | 1.904810713  |
| C | 5.6632480824   | -1.79150559   | -1.4809422534 | C | -2.927996359  | 0.2906462494  | 5.4850003213 |
| C | 5.7624705217   | -0.4698216767 | -1.122894     | C | 0.5407525406  | -0.6497741626 | 7.3777949494 |
| S | 4.1814350719   | 0.2492049096  | -1.1522999633 | C | 3.6183568385  | 0.4535970971  | 4.9702870647 |
| C | -10.4875244651 | 1.9409584235  | -2.6103399984 | C | 2.0557675007  | 2.0666845947  | 1.5816333323 |
| C | -9.6758573576  | 3.0380113624  | -2.2151800069 | C | -0.7401850984 | 2.2468562273  | 1.2720711438 |
| C | -7.7125397486  | 1.6787609807  | -2.3022632334 | C | -3.1928437692 | 0.8938326429  | 4.2181874128 |
| C | -8.5243723907  | 0.5813493751  | -2.69721475   | C | -0.8770521019 | -0.5590233888 | 7.2205110069 |
| C | -9.8975441625  | 0.6932920542  | -2.8650614006 | C | 3.0105203037  | -0.0939072156 | 6.1408666823 |

|   |                |               |               |   |               |              |               |
|---|----------------|---------------|---------------|---|---------------|--------------|---------------|
| C | -11.8632792485 | 2.3036249508  | -2.6879932067 | C | 3.0939369765  | 1.6391066599 | 2.4656755428  |
| H | -12.6443682151 | 1.5976135779  | -2.9492981549 | C | -0.7115840869 | 4.4240602866 | 2.2921384948  |
| C | -6.3400253953  | 1.309263697   | -2.1966838343 | C | -3.139882893  | 3.0680691082 | 5.2483213082  |
| S | -7.5834579092  | -0.8659875652 | -2.9206565106 | C | -0.8445846402 | 1.6262725252 | 8.2286029325  |
| H | -5.5647708703  | 2.002147818   | -1.8874942982 | C | 3.0110186854  | 2.086264523  | 7.1651916434  |
| S | -10.6212340253 | 4.4746727124  | -1.9462335957 | C | 3.1206318749  | 3.8158887513 | 3.4868908115  |
| C | -8.300335499   | 2.9313851399  | -2.0670925967 | C | -1.9601363055 | 4.1425605445 | 2.9268094054  |
| C | -12.0963942549 | 3.6161678042  | -2.3757935913 | C | -2.633115002  | 1.0769127124 | 6.6256264609  |
| O | -7.5482665519  | 4.0008400763  | -1.6720013215 | C | 1.2997402395  | 0.4529889717 | 7.8355912171  |
| O | -10.6605565771 | -0.378696489  | -3.2315391711 | C | 3.8085532065  | 1.8496795747 | 4.8277584379  |
| C | -7.0330917089  | 4.769861268   | -2.7526876071 | C | 1.438707685   | 3.3315344218 | 1.7296337384  |
| H | -6.4659075215  | 5.5879379492  | -2.3045578943 | C | -0.0139215244 | 3.4250317082 | 1.5685182748  |
| H | -6.3699041548  | 4.1671546286  | -3.3858846655 | C | -3.1683377279 | 2.3004267212 | 4.0572849623  |
| H | -7.8431481652  | 5.1810935133  | -3.3674729996 | C | -1.5700781175 | 0.6375608093 | 7.5164143276  |
| C | -10.7692290674 | -0.5517236019 | -4.6397541182 | C | 2.5771796158  | 0.7394013714 | 7.2010101186  |
| H | -11.3853180514 | -1.4397723798 | -4.7932980945 | C | 3.5436250724  | 2.4650337528 | 3.5251508828  |
| H | -11.2519642153 | 0.3158912293  | -5.107115362  | C | -2.5499100503 | 2.8579476916 | 2.8527714889  |
| H | -9.7850791334  | -0.7074627232 | -5.0981978125 | C | -0.0780150704 | 5.2015920017 | 9.2005918859  |
| C | -6.1066730915  | -0.0047530245 | -2.5019106183 | C | -1.4489464943 | 5.6621207203 | 9.6424437846  |
| C | -2.3820874667  | -1.282813348  | -2.3828453961 | C | 0.9317845091  | 5.7098467535 | 10.239898213  |
| C | -3.1907074087  | -2.3302353311 | -2.7471549049 | C | -1.9280931588 | 6.9159882696 | 9.2577835433  |
| C | -4.5606776049  | -1.9943193133 | -2.8106743933 | C | -2.2002184839 | 4.8948696935 | 10.5347866889 |
| C | -4.8370619938  | -0.6851222657 | -2.504858411  | H | 0.7617010597  | 6.7944180442 | 10.2972397326 |
| S | -3.3546848365  | 0.1402784937  | -2.1302875811 | H | 0.5788873248  | 5.3148558267 | 11.2031863402 |
| S | -18.5838991238 | 8.1137385039  | -4.38173991   | C | 2.4320363513  | 5.4619645208 | 10.1333344843 |
| C | -20.0978536285 | 4.7537285247  | -3.5265493942 | C | -3.1429864587 | 7.3888347845 | 9.7453011592  |
| C | -17.9887816034 | 3.7717116174  | -2.6836207903 | H | -1.3484330437 | 7.5234920548 | 8.5667618638  |
| C | -19.3677907082 | 3.7213495883  | -2.9777862693 | C | -3.4153719127 | 5.3659337038 | 11.0235607762 |
| H | -17.5469189303 | 2.8852843989  | -2.2391524722 | H | -1.833578631  | 3.9186869621 | 10.8433625603 |
| C | -19.3410969635 | 5.9466222563  | -3.7692972601 | H | 2.6615668076  | 4.3933361477 | 10.1275117027 |
| C | -17.9235110833 | 6.016362174   | -3.4893758486 | H | 2.8383855415  | 5.8721976674 | 9.2052431793  |
| C | -17.2288022278 | 4.8969146331  | -2.9238389499 | C | 3.1498741487  | 6.109628522  | 11.3101384088 |
| N | -17.379143993  | 7.1882018785  | -3.8107217857 | C | -3.8906991654 | 6.6134744125 | 10.6277005095 |
| N | -19.8332517087 | 7.0814397096  | -4.2626586136 | H | -3.5065586094 | 8.3637667412 | 9.432344747   |
| C | -15.8019892923 | 4.9308279084  | -2.6556055137 | H | -3.9923127262 | 4.7552059825 | 11.7125961269 |
| C | -15.0219290599 | 5.9384553856  | -2.1472967546 | H | 2.9637917367  | 7.1912216025 | 11.3497299385 |
| C | -13.6622461263 | 5.5813682764  | -1.9996284256 | H | 2.7848462758  | 5.7155515205 | 12.2684613793 |
| C | -13.3660782392 | 4.2956289887  | -2.3787207864 | C | 4.6426908579  | 5.8944528304 | 11.2596337484 |
| S | -14.8159459555 | 3.5250483161  | -2.9511577825 | H | -4.8412426314 | 6.9800996581 | 11.0052613421 |
| C | -29.9274884044 | 2.6615264815  | -2.6597813906 | O | 5.2324607513  | 5.256821204  | 10.4195774387 |
| C | -29.2688963158 | 2.1196570291  | -1.5234086744 | O | 5.2506433479  | 6.5105340125 | 12.2865618092 |
| C | -27.1585010866 | 2.9275303538  | -2.3008926079 | C | 6.6676943299  | 6.3599662705 | 12.3234103284 |
| C | -27.8180353841 | 3.4722614177  | -3.4355847405 | H | 6.9417243406  | 5.3049798915 | 12.4102424425 |
| C | -29.1881066204 | 3.3613094142  | -3.6256592721 | H | 7.1226412983  | 6.767428611  | 11.4165036674 |

|   |                |              |               |   |                |               |               |
|---|----------------|--------------|---------------|---|----------------|---------------|---------------|
| C | -31.3254347598 | 2.3864601916 | -2.6404094306 | H | 7.0012310747   | 6.9147128026  | 13.2006720058 |
| H | -31.9984059006 | 2.7003919961 | -3.431209727  | F | 6.6989195293   | -2.6220909886 | -1.5651799796 |
| C | -25.7532674051 | 3.1626606904 | -2.3443809408 | F | 4.1033186161   | -3.4617364555 | -2.1589019677 |
| S | -26.6994669271 | 4.2507475116 | -4.5180044921 | F | -5.4796899136  | -2.8897494884 | -3.1637350532 |
| H | -25.071253169  | 2.8033208857 | -1.5812247506 | F | -2.7714648442  | -3.5451925953 | -3.064856456  |
| S | -30.3796317413 | 1.2901935982 | -0.4703532646 | F | -12.7698856156 | 6.4405534352  | -1.5154540879 |
| C | -27.9022340279 | 2.2508950657 | -1.3215336728 | F | -15.4564263441 | 7.1256815262  | -1.7574739121 |
| C | -31.7222495371 | 1.6711270195 | -1.542545209  | F | -21.6006368071 | 5.7438657278  | -5.9702829063 |
| O | -27.2951484131 | 1.7047161844 | -0.2266287655 | F | -24.3557403235 | 5.3346408195  | -5.8994496751 |
| O | -29.7946622378 | 3.8800683991 | -4.7341757637 | F | -32.740649456  | 0.176146197   | 0.886484009   |
| C | -27.1984733025 | 2.5948262338 | 0.8790484233  | F | -35.4762494698 | -0.3357267894 | 0.8805594206  |
| H | -26.7050072295 | 2.0389400785 | 1.6785855049  | F | -44.0288370551 | -1.0932772555 | -4.2162723786 |
| H | -26.6009616266 | 3.4790482646 | 0.623643502   | F | -41.3444443281 | -1.670540442  | -3.7440040582 |

**Table S26.** The coordinate of 9/PC<sub>71</sub>BM (296 atoms).

| Atom | Coordinates (Angstroms) |               |               | Atom | Coordinates (Angstroms) |               |               |
|------|-------------------------|---------------|---------------|------|-------------------------|---------------|---------------|
|      | X                       | Y             | Z             |      | X                       | Y             | Z             |
| C    | 14.7543961269           | 0.4364064197  | 0.2897098434  | O    | -20.6535052912          | 2.6414763214  | 0.4340049143  |
| C    | 16.8810190614           | -0.9160186452 | 0.2735494112  | O    | -20.0175994198          | -2.7841891025 | -0.7728438479 |
| C    | 15.4828313678           | -0.7656360385 | 0.3174168713  | C    | -20.8061180061          | 2.9246740107  | 1.8194334093  |
| C    | 13.2621917837           | 0.3743980142  | 0.2835103556  | H    | -20.9076700004          | 4.0085404305  | 1.9019893044  |
| C    | 12.5410931726           | 1.5051335443  | 0.6849328357  | H    | -21.7029705104          | 2.440515019   | 2.2255697444  |
| C    | 11.1551811262           | 1.5040082359  | 0.6881082011  | H    | -19.9277718443          | 2.595983405   | 2.3886304597  |
| C    | 10.4333491657           | 0.3768533393  | 0.2672691197  | C    | -19.850817954           | -3.6267681883 | 0.3607390149  |
| C    | 11.1582498197           | -0.7458837147 | -0.1624304596 | H    | -19.7533105341          | -4.6436616554 | -0.0243442045 |
| C    | 12.5437775837           | -0.749101579  | -0.1463695297 | H    | -18.9475428776          | -3.3598847133 | 0.9233773378  |
| H    | 14.9050268922           | -1.6770950771 | 0.3806870393  | H    | -20.7213742486          | -3.5701338812 | 1.025917909   |
| H    | 13.0914484199           | 2.3879580404  | 0.9936435917  | S    | -26.8078548193          | 3.1904266401  | 0.5223306499  |
| H    | 10.6226644594           | 2.3867893822  | 1.0332238564  | C    | -28.285283374           | -0.2051224735 | -0.3319527845 |
| H    | 10.6271506737           | -1.6125480737 | -0.5448160756 | C    | -26.0719249675          | -1.2995128833 | -0.5522024851 |
| H    | 13.0683093669           | -1.6232900404 | -0.5196101555 | C    | -27.4893997636          | -1.3009342801 | -0.5820747011 |
| C    | 17.4627142175           | -2.2892136153 | 0.3822891241  | C    | -27.5213306121          | 0.9805763849  | -0.0300530616 |
| C    | 16.7869146669           | -3.3548703604 | 0.9887409904  | C    | -26.0673003158          | 0.9814368401  | 0.0033015124  |
| C    | 18.7498982806           | -2.5088942366 | -0.1235871523 | C    | -25.2892373853          | -0.2020377475 | -0.2693750479 |
| C    | 17.3763849825           | -4.6118655831 | 1.070181845   | N    | -25.5607843162          | 2.1731005048  | 0.3060614791  |
| H    | 15.807286984            | -3.1985308928 | 1.430471155   | N    | -28.0424144821          | 2.1727181013  | 0.2450803468  |
| C    | 19.3340127753           | -3.7675818607 | -0.0520856552 | C    | -31.9672788843          | 0.4590818355  | -0.2233582625 |
| H    | 19.2814793263           | -1.6729590752 | -0.5669927689 | C    | -32.1426003707          | -0.9024238541 | -0.5833893276 |
| C    | 18.6479015938           | -4.8244644543 | 0.5428971083  | C    | -34.5202871879          | -0.6675763848 | -0.514595006  |
| H    | 16.8431470279           | -5.4262290591 | 1.5532758086  | C    | -34.3441934656          | 0.6977422726  | -0.1605054419 |
| H    | 20.3299355767           | -3.9242613947 | -0.4578300808 | C    | -33.0906389918          | 1.2770823479  | -0.0218190847 |
| H    | 19.105814725            | -5.8082074171 | 0.6033830885  | C    | -30.5903452927          | 0.8045481301  | -0.1047539971 |
| O    | 15.2342988054           | 1.6150846202  | 0.305961106   | H    | -30.2443298763          | 1.787049334   | 0.1839126589  |
| O    | 17.7363146468           | 0.0095297553  | 0.1034557088  | C    | -35.9092924301          | -1.0207850474 | -0.5837900486 |



|    |               |               |               |   |                |               |               |
|----|---------------|---------------|---------------|---|----------------|---------------|---------------|
| Ir | 17.3178925537 | 2.1286378068  | 0.0582453612  | S | -35.8762773376 | 1.4958880717  | 0.0732861472  |
| C  | 19.2580499567 | 2.535142993   | -0.0256251849 | H | -36.2599739615 | -2.0192687877 | -0.8171019383 |
| C  | 20.022938615  | 2.7753219361  | -1.1701641741 | S | -30.6200516608 | -1.7175192649 | -0.7659510218 |
| C  | 19.9071381255 | 2.5363992718  | 1.2419052354  | C | -33.3982476869 | -1.47555117   | -0.7413242825 |
| C  | 21.38615869   | 2.9934027036  | -1.0548185652 | C | -29.7370690217 | -0.2369964148 | -0.3684852869 |
| H  | 19.5751811188 | 2.7954772164  | -2.1580373186 | O | -33.5352580723 | -2.7956787177 | -1.0697146986 |
| C  | 21.2863510221 | 2.7607831275  | 1.2936327156  | O | -32.964270349  | 2.5883738869  | 0.3371587939  |
| C  | 22.0499951965 | 2.9899238271  | 0.1655664056  | C | -33.6008239956 | -3.031314267  | -2.4701272222 |
| H  | 23.1168251306 | 3.1627998878  | 0.2357037216  | H | -33.6981458607 | -4.1114621349 | -2.5967023961 |
| C  | 19.0412882305 | 2.3132432146  | 2.3905521679  | H | -34.4700706777 | -2.530093772  | -2.9147813948 |
| C  | 19.4099481567 | 2.2819063248  | 3.7415576457  | H | -32.6893965905 | -2.686274494  | -2.9739776424 |
| C  | 18.4453254712 | 2.0846807311  | 4.716561933   | C | -32.7683056771 | 3.4688607743  | -0.762064735  |
| H  | 20.4481220823 | 2.4148962386  | 4.0106891027  | H | -32.6941640738 | 4.4735971685  | -0.3413375035 |
| C  | 16.8009106886 | 1.9560982772  | 2.9975140223  | H | -31.8443740765 | 3.2294931294  | -1.3029994182 |
| C  | 17.1125195425 | 1.9214729017  | 4.3453988261  | H | -33.6157405711 | 3.4253476838  | -1.45748396   |
| H  | 18.7332893215 | 2.061528459   | 5.763820393   | C | -36.7248334264 | 0.0252643082  | -0.3016031389 |
| H  | 15.7880034191 | 1.8410625302  | 2.6271790317  | H | -37.8074276135 | 0.0232774222  | -0.2762933022 |
| H  | 16.3278089084 | 1.7699272111  | 5.0784623175  | F | 0.3155958635   | -2.362378093  | -0.2519335341 |
| C  | 16.5111577858 | 3.3958377375  | -2.4305594155 | F | -2.1995946723  | -2.3892435635 | -0.3026375967 |
| C  | 17.0912243097 | 1.144690068   | -2.7584371068 | F | -12.6420976712 | 2.40332123    | 0.2929983268  |
| C  | 16.192777715  | 3.5096924319  | -3.7898882527 | F | -15.1530880697 | 2.3820796435  | 0.3060283405  |
| C  | 16.7944846003 | 1.2058948719  | -4.1086178525 | F | -25.5177385565 | -2.4806992202 | -0.8271867709 |
| H  | 17.457779799  | 0.2432004305  | -2.2802178544 | F | -28.0290850431 | -2.4832691872 | -0.8806557082 |
| C  | 16.3336202475 | 2.414293705   | -4.6266646493 | C | 1.1772467201   | 2.9212341648  | 10.7715146528 |
| H  | 15.8408272877 | 4.4568642702  | -4.1728778637 | C | 2.4306806563   | 2.2503556557  | 11.2137151043 |
| H  | 16.921984379  | 0.327014609   | -4.7310118964 | C | 3.4353442649   | 2.6683790298  | 10.1950439977 |
| H  | 16.0864801381 | 2.5044990128  | -5.6806512204 | C | 2.882397268    | 3.7375568308  | 9.4097994311  |
| C  | 16.4511617229 | 4.4405192694  | -1.4187173533 | C | -0.5768293377  | -1.0428965015 | 3.9648117203  |
| C  | 16.0530813377 | 5.7631545205  | -1.6373419865 | C | -0.901328697   | -2.0539483332 | 4.9457291027  |
| C  | 16.8536434133 | 4.0507521315  | -0.1097550031 | C | 0.28888342     | -2.8392266793 | 5.1895155876  |
| C  | 16.0396983236 | 6.7152622974  | -0.6365835692 | C | 1.349211269    | -2.3089172034 | 4.3610468474  |
| C  | 16.8520673659 | 5.0114586089  | 0.9051959006  | C | 0.8129498646   | -1.2003707906 | 3.6044243207  |
| C  | 16.4486771829 | 6.3072558639  | 0.626772316   | C | 1.4960515368   | 3.8937560712  | 9.7666546288  |
| H  | 15.7276809641 | 7.7332725238  | -0.8346459084 | C | -0.0477492786  | 2.2802404351  | 10.720011241  |
| H  | 17.1607633349 | 4.7698301711  | 1.916792615   | C | 2.3068363451   | 0.6592453044  | 11.4305818447 |
| N  | 16.9514348012 | 2.2009763119  | -1.9463113718 | C | 4.3077699859   | 1.7846982746  | 9.5830871058  |
| N  | 17.7325997639 | 2.1409313682  | 2.0526555232  | C | 3.2826084284   | 3.9483009214  | 8.0875623187  |
| F  | 16.4482230056 | 7.2155412538  | 1.6109792252  | C | -1.119146007   | 0.235880697   | 4.0856096547  |
| F  | 15.6605713712 | 6.1613025023  | -2.8624794454 | C | -1.7535888312  | -1.7442053076 | 6.0025382102  |
| F  | 21.9310235942 | 2.7614151043  | 2.4760053771  | C | 0.5738121673   | -3.2821150688 | 6.4777339278  |
| F  | 22.1065960151 | 3.2179059548  | -2.1611792024 | C | 2.6493858844   | -2.2453871322 | 4.85679755    |
| C  | 6.7597400497  | -0.3951133187 | 0.2345512801  | C | 1.6009257675   | -0.0722918512 | 3.3820257188  |
| C  | 6.5581227619  | 1.0111752216  | 0.1792312196  | C | 0.5620383674   | 4.2580509443  | 8.793537187   |
| C  | 4.1890693615  | 0.7183507912  | 0.0907546519  | C | -0.1544548774  | 0.8397976793  | 10.9234296095 |

|   |                |               |               |   |               |               |               |
|---|----------------|---------------|---------------|---|---------------|---------------|---------------|
| C | 4.3888782988   | -0.6857790575 | 0.151646588   | C | 3.2118989888  | -0.1760988492 | 10.5996446139 |
| C | 5.6523877514   | -1.2553974608 | 0.2399543123  | C | 4.7018270434  | 1.9771213721  | 8.2126272524  |
| C | 8.1476049049   | -0.7274839163 | 0.2783227649  | C | 2.3103798614  | 4.3004340174  | 7.0813631017  |
| H | 8.5052850424   | -1.7491637518 | 0.332663771   | C | -1.9924226374 | 0.5521455079  | 5.1879182588  |
| C | 2.809165968    | 1.0544366497  | -0.0033392646 | C | -1.447990844  | -2.1982169676 | 7.3371045728  |
| S | 2.8848680615   | -1.5505129878 | 0.075373257   | C | 1.9214292548  | -3.2077744777 | 6.9896480672  |
| H | 2.4456740493   | 2.0700412717  | -0.0699057705 | C | 3.4564516421  | -1.0710297977 | 4.6281549987  |
| S | 8.0721331477   | 1.8696717996  | 0.1724065705  | C | 1.0355750813  | 1.2466628002  | 3.5109648998  |
| C | 5.2963304031   | 1.5831462581  | 0.1210097504  | C | -0.2967923476 | 1.3983375122  | 3.855648965   |
| C | 8.9722781966   | 0.3619765899  | 0.2549439603  | C | -2.3041983326 | -0.4166335972 | 6.1266119056  |
| C | 1.976454765    | -0.0367781465 | -0.0117230636 | C | -0.3108447538 | -2.9547499707 | 7.5702370516  |
| O | 5.1478196431   | 2.9380815416  | 0.0530268877  | C | 2.9367574602  | -2.6973735825 | 6.1961595021  |
| O | 5.8136119293   | -2.6116860025 | 0.294835563   | C | 2.9419743651  | -0.0080385358 | 3.904887942   |
| C | 4.879246906    | 3.5525935187  | 1.3084091075  | C | 0.9785508051  | 4.4520905278  | 7.4264542567  |
| H | 4.8047625519   | 4.6243632939  | 1.1143655974  | C | -1.0004486858 | 2.6249637358  | 9.6967854217  |
| H | 3.9363972735   | 3.1908239896  | 1.7363791793  | C | 0.9658644578  | 0.0801050589  | 11.1709382316 |
| H | 5.6926845392   | 3.3651672315  | 2.0202732552  | C | 4.1935814549  | 0.3454474475  | 9.7877580829  |
| C | 5.8156428379   | -3.1284714691 | 1.6204326399  | C | 4.2109425383  | 3.0463519467  | 7.4787802258  |
| H | 5.920679144    | -4.2114027069 | 1.528529886   | C | -0.7102859225 | 3.6049932718  | 8.7587391423  |
| H | 6.6564451362   | -2.7254464175 | 2.1992746555  | C | -1.1764268029 | 0.3376698935  | 10.0367076266 |
| H | 4.8780806139   | -2.8951134586 | 2.1403032156  | C | 2.4918993022  | -1.3336438059 | 10.1464224548 |
| S | -1.0139393221  | 3.4371289081  | 0.240831988   | C | 4.8523296573  | 0.6894088408  | 7.5836674749  |
| C | -2.4686859117  | -0.0568394293 | -0.0979629049 | C | 2.6600931555  | 3.6324953663  | 5.8502670849  |
| C | -0.2484976368  | -1.1573152077 | -0.1629113194 | C | -1.7246420566 | 1.905954004   | 5.6154464527  |
| C | -1.6660611689  | -1.172824953  | -0.1853395201 | C | -1.8304057912 | -1.1671347414 | 8.2721208075  |
| C | -1.7138205232  | 1.1661674416  | 0.0213541768  | C | 1.8620488256  | -2.8546496039 | 8.3871397909  |
| C | -0.2602958263  | 1.1828654383  | 0.0347783129  | C | 4.2480071835  | -0.818598692  | 5.8094260723  |
| C | 0.5253532256   | -0.0229170091 | -0.0570260469 | C | 2.0305466404  | 2.1226583153  | 4.0875406422  |
| N | 0.2390780496   | 2.4095066993  | 0.1533674357  | C | -0.6814058902 | 2.4303777659  | 4.792326434   |
| N | -2.2427136947  | 2.3816637144  | 0.1284223881  | C | -2.356942438  | -0.0683945513 | 7.5270908708  |
| C | -6.1517403109  | 0.5995694884  | -0.0593929877 | C | 0.4867553039  | -2.698854606  | 8.7442857358  |
| C | -6.321667393   | -0.7902939034 | -0.2981400686 | C | 3.9280168286  | -1.8218653102 | 6.7743255695  |
| C | -8.699329267   | -0.5479153897 | -0.2808072046 | C | 3.2053515078  | 1.3464979629  | 4.3335600735  |
| C | -8.5284996632  | 0.8427590014  | -0.0485406022 | C | -0.0519111589 | 3.9402700706  | 6.554886786   |
| C | -7.2771089859  | 1.4322085906  | 0.0551361961  | C | -1.7019118612 | 1.433980962   | 9.2890575821  |
| C | -4.7776201362  | 0.957587079   | 0.0364096047  | C | 1.1185218351  | -1.1764289203 | 10.4984499146 |
| H | -4.4352850134  | 1.9637446333  | 0.2329272813  | C | 4.5336255909  | -0.3112672812 | 8.5496265493  |
| C | -10.0745223625 | -0.9109590369 | -0.3367752346 | C | 3.8324990738  | 2.8545953941  | 6.0971430035  |
| S | -10.0527161429 | 1.6617217385  | 0.0964546454  | C | -1.0933859089 | 3.4131593029  | 7.3782288845  |
| H | -10.4178134902 | -1.9250439742 | -0.4858809344 | C | -1.112953704  | -0.9610264021 | 9.4755856479  |
| S | -4.7956215565  | -1.6153183929 | -0.3912218413 | C | 2.8699130361  | -2.0669989359 | 8.992151662   |
| C | -7.5733711618  | -1.3765511516 | -0.4196586749 | C | 4.5870686245  | 0.4980812418  | 6.2051526361  |
| C | -3.9202569335  | -0.1017009248 | -0.1269552328 | C | 1.6687661132  | 3.197012675   | 4.935095747   |
| C | -10.9305455197 | 0.1483215924  | -0.1622862634 | C | 0.2597412432  | 3.3567604458  | 5.3012776305  |

|   |                |               |               |   |               |               |               |
|---|----------------|---------------|---------------|---|---------------|---------------|---------------|
| O | -7.7027943113  | -2.7195137862 | -0.6301313542 | C | -2.178307765  | 1.2661911791  | 7.9647327007  |
| O | -7.1526300914  | 2.769593618   | 0.2998474707  | C | 0.0860755999  | -1.7500951036 | 9.7134881975  |
| C | -7.8258512694  | -3.075653351  | -2.0015229125 | C | 3.939875442   | -1.5360571266 | 8.1615176566  |
| H | -7.9125701207  | -4.1635853004 | -2.029806527  | C | 4.0515170287  | 1.6226502871  | 5.4350983334  |
| H | -8.7207701993  | -2.6248692017 | -2.4484371867 | C | -1.8571359707 | 2.2929507171  | 6.9713692183  |
| H | -6.9410662441  | -2.7650646871 | -2.5709017653 | C | 2.6350446356  | 1.6084342744  | 12.5624485995 |
| C | -6.9551469281  | 3.5534830772  | -0.8702822698 | C | 1.5292727949  | 1.8311121442  | 13.5695544603 |
| H | -6.8795314196  | 4.5899925725  | -0.5359096499 | C | 3.9625101992  | 1.610135023   | 13.3348428234 |
| H | -6.0312170211  | 3.2674982318  | -1.3880839994 | C | 1.1443726735  | 3.1267182615  | 13.9196337961 |
| H | -7.8025085276  | 3.453214487   | -1.5598563636 | C | 0.9649663262  | 0.7503359576  | 14.250033535  |
| S | -13.8553503325 | -3.3314312758 | -0.8433691287 | H | 3.981328067   | 2.5702600797  | 13.8701289885 |
| C | -15.3787439395 | 0.0807263266  | -0.1517066315 | H | 3.8413282328  | 0.849200855   | 14.1188883567 |
| C | -13.1799227223 | 1.2060192895  | 0.0583141309  | C | 5.315680034   | 1.4017602777  | 12.6646864208 |
| C | -14.5973467088 | 1.1942266378  | 0.0649044971  | C | 0.2032601859  | 3.3382530045  | 14.9231672397 |
| C | -14.5989889724 | -1.1084930123 | -0.3929372694 | H | 1.5809612522  | 3.9753465912  | 13.3984210539 |
| C | -13.1446548916 | -1.0960094006 | -0.4017838503 | C | 0.0237269189  | 0.9595168035  | 15.253690893  |
| C | -12.3821998621 | 0.1053487522  | -0.1648744446 | H | 1.2606050208  | -0.262593477  | 13.9869688482 |
| N | -12.6218800587 | -2.2936896386 | -0.6475009757 | H | 5.3626302697  | 0.4361065831  | 12.1547956217 |
| N | -15.104168463  | -2.3158377315 | -0.6282916835 | H | 5.5064282389  | 2.1639643016  | 11.9048405251 |
| C | -19.0515348531 | -0.6249827962 | -0.2814954736 | C | 6.425333131   | 1.4595713283  | 13.7061264565 |
| C | -19.2435453643 | 0.7479315441  | 0.0278719982  | C | -0.3608447286 | 2.2546521733  | 15.5913558945 |
| C | -21.6167603282 | 0.4805895215  | -0.0486523564 | H | -0.0910367834 | 4.3519856033  | 15.1808256175 |
| C | -21.4250679427 | -0.8939129505 | -0.3506542208 | H | -0.4112601875 | 0.1084382802  | 15.7705117295 |
| C | -20.1646214221 | -1.4629823861 | -0.4612938525 | H | 6.4357906621  | 2.4249363676  | 14.2299780538 |
| C | -17.6710360896 | -0.9601496447 | -0.3721472106 | H | 6.280054624   | 0.7041093645  | 14.490304471  |
| H | -17.3120808866 | -1.9493517871 | -0.6191764854 | C | 7.7909542298  | 1.2433582032  | 13.1016361743 |
| C | -22.9967028093 | 0.8260963688  | -0.0007235984 | H | -1.0984913033 | 2.4188667433  | 16.3720112769 |
| S | -22.9375403327 | -1.7198364725 | -0.566798924  | O | 8.0177036134  | 1.0387738094  | 11.9326221709 |
| H | -23.3541275235 | 1.8274788263  | 0.1937870338  | O | 8.7472833682  | 1.3058563226  | 14.0430405424 |
| S | -17.731383662  | 1.5849051523  | 0.1971777292  | C | 10.0751128225 | 1.1104449382  | 13.5632174769 |
| C | -20.5041574324 | 1.3129397675  | 0.1562636911  | H | 10.1768654073 | 0.1255177962  | 13.0993366486 |
| C | -16.8309288383 | 0.0997430178  | -0.1363828891 | H | 10.3353148087 | 1.8743348216  | 12.825402686  |
| C | -23.8371355197 | -0.2310738793 | -0.2466643816 | H | 10.7203886985 | 1.1891708507  | 14.4384674696 |

**Table S27.** The coordinate of **10/PC<sub>71</sub>BM** (338 atoms).

| Atom | Coordinates (Angstroms) |              |               | Atom | Coordinates (Angstroms) |              |               |
|------|-------------------------|--------------|---------------|------|-------------------------|--------------|---------------|
|      | X                       | Y            | Z             |      | X                       | Y            | Z             |
| C    | 17.4773663442           | 8.4995309132 | -1.4306572581 | O    | -30.165705247           | 6.229272519  | -2.0780086194 |
| C    | 19.7977295978           | 8.4775181519 | -2.4123939925 | C    | -26.7538343738          | 1.0232212498 | -1.0163308771 |
| C    | 18.5568412539           | 7.8946423877 | -2.0974155603 | H    | -26.0853370102          | 0.1788864031 | -1.1957511385 |
| C    | 16.2054565472           | 7.7338389654 | -1.2556082428 | H    | -26.3428553428          | 1.652829859  | -0.2171809176 |
| C    | 15.2674144062           | 8.2062347552 | -0.3290556644 | H    | -27.7392507156          | 0.6503632917 | -0.7106256384 |
| C    | 14.0674171248           | 7.543894869  | -0.1239658344 | C    | -30.87334278            | 6.3907874324 | -0.8547691044 |
| C    | 13.7515889722           | 6.3853495528 | -0.8487605706 | H    | -31.4700823681          | 7.2987013219 | -0.9623381962 |

|    |               |               |               |   |                |               |               |
|----|---------------|---------------|---------------|---|----------------|---------------|---------------|
| C  | 14.6803536537 | 5.9266609052  | -1.7957146772 | H | -31.5359831262 | 5.5372057345  | -0.6643817378 |
| C  | 15.8840895026 | 6.5851039195  | -1.9910193003 | H | -30.1823010443 | 6.5056320471  | -0.0104777362 |
| H  | 18.4160674605 | 6.8729300618  | -2.419622613  | C | -25.6698258388 | 5.7638340822  | -1.1142796963 |
| H  | 15.5010576167 | 9.1076691202  | 0.2277911555  | C | -22.1131791879 | 7.0754177017  | -0.1127413333 |
| H  | 13.3699950677 | 7.9193408627  | 0.6207874989  | C | -23.0151638692 | 8.1149608854  | 0.0364844543  |
| H  | 14.4369403898 | 5.0636443816  | -2.408703021  | C | -24.3361183994 | 7.7661448044  | -0.2954668753 |
| H  | 16.5574348482 | 6.2165155766  | -2.7583668454 | C | -24.4730831261 | 6.4551139668  | -0.7042693935 |
| C  | 20.8318704496 | 7.6431890045  | -3.0986339647 | S | -22.9424799803 | 5.64568096    | -0.6811273184 |
| C  | 20.8551375283 | 6.2455120604  | -3.0201680924 | H | -22.7138943936 | 9.0955915166  | 0.3780497198  |
| C  | 21.8345026396 | 8.2926866693  | -3.8292416066 | H | -25.1704280843 | 8.4569947592  | -0.2321201133 |
| C  | 21.8446099089 | 5.5166278626  | -3.6711212332 | S | -37.4748504695 | -2.4512750898 | -6.1146543633 |
| H  | 20.1173444062 | 5.7205121752  | -2.4207786782 | C | -39.1042509613 | 0.9464629343  | -5.6263897707 |
| C  | 22.8163349122 | 7.5637277733  | -4.4889295317 | C | -37.0283495688 | 2.0116598105  | -4.7937825631 |
| H  | 21.829477271  | 9.3774600733  | -3.8634511989 | C | -38.3978996274 | 2.0293198451  | -5.1476845733 |
| C  | 22.823279443  | 6.1723183575  | -4.4142902505 | C | -38.2956514565 | -0.242452971  | -5.7347222544 |
| H  | 21.8550530538 | 4.4328746585  | -3.591743382  | C | -36.8878731491 | -0.2605765706 | -5.370896089  |
| H  | 23.5817831701 | 8.0826430124  | -5.0597360036 | C | -36.2046619719 | 0.9093429122  | -4.8775607748 |
| H  | 23.5934868176 | 5.6011937519  | -4.9258135974 | N | -36.3268242668 | -1.4536558683 | -5.5450326274 |
| O  | 17.4685864681 | 9.6594251409  | -0.907364801  | N | -38.7305103889 | -1.4226332691 | -6.1667513742 |
| O  | 20.1399458564 | 9.6860118564  | -2.2125371418 | C | -34.8029207262 | 0.9209439276  | -4.5137071125 |
| Ir | 19.0172205362 | 11.1501972659 | -1.0896418436 | C | -33.9044202666 | -0.1306796766 | -4.5691723092 |
| C  | 20.5345147206 | 12.425698202  | -1.179705793  | C | -32.6085413304 | 0.2133363786  | -4.1476330217 |
| C  | 20.7260796781 | 13.4448570003 | -2.1162783998 | C | -32.4866630791 | 1.5328311362  | -3.7618690135 |
| C  | 21.5305327438 | 12.2183432335 | -0.1835786841 | S | -34.0015493228 | 2.3570832073  | -3.9207597417 |
| C  | 21.8754955078 | 14.2166601391 | -2.0699438795 | H | -34.1900023794 | -1.1162618793 | -4.9096546227 |
| H  | 19.9926303755 | 13.6514953984 | -2.8881586105 | H | -31.7803842802 | -0.4875211777 | -4.1310955491 |
| C  | 22.6697598189 | 13.029377925  | -0.188781513  | C | -48.462502005  | 4.3429928324  | -7.206251295  |
| C  | 22.8699565138 | 14.0321129676 | -1.1175765661 | C | -47.7576093846 | 5.3659863008  | -6.5179303762 |
| H  | 23.7618843834 | 14.6461021894 | -1.0970128353 | C | -45.7775416858 | 4.0282135428  | -6.4424446055 |
| C  | 21.2465192004 | 11.1614648336 | 0.7760495694  | C | -46.4823640312 | 3.0071934641  | -7.1348630258 |
| C  | 22.0369614702 | 10.7644685671 | 1.8621425515  | C | -47.8046071888 | 3.1477613761  | -7.5304370891 |
| C  | 21.6008142546 | 9.751074059   | 2.7002650998  | C | -49.8222955123 | 4.7198772424  | -7.4669004477 |
| H  | 22.982544939  | 11.2576382135 | 2.0365784244  | H | -50.5378013619 | 4.0724603777  | -7.9603064924 |
| C  | 19.6339811023 | 9.5612526129  | 1.3690745391  | C | -44.4398576901 | 3.6344429394  | -6.1358091225 |
| C  | 20.3751171461 | 9.1351972545  | 2.4572388578  | S | -45.4818375642 | 1.606130939   | -7.3958235098 |
| H  | 22.214758718  | 9.4451361561  | 3.5426784164  | H | -43.7528282972 | 4.260705037   | -5.577000475  |
| H  | 18.6688707003 | 9.1363035268  | 1.1164542548  | S | -48.7785798953 | 6.7459162157  | -6.2162766461 |
| H  | 19.9964294854 | 8.3419079731  | 3.0923571489  | C | -46.4267339756 | 5.2334486087  | -6.1401473818 |
| C  | 17.0096358037 | 12.7658448362 | -2.4324494549 | O | -45.785003322  | 6.230946516   | -5.4621249146 |
| C  | 18.2150389231 | 11.4475999623 | -3.9563824946 | O | -48.4508897563 | 2.1345142597  | -8.1826577433 |
| C  | 16.2256218488 | 13.2598346826 | -3.482872577  | C | -45.0883723298 | 7.1401068226  | -6.3050937239 |
| C  | 17.4719125158 | 11.9079280097 | -5.0290746945 | H | -44.6366574853 | 7.8852079236  | -5.64719081   |
| H  | 19.0235774262 | 10.733456361  | -4.0681924539 | H | -44.301757522  | 6.6291259291  | -6.8745495654 |
| C  | 16.4567588967 | 12.828882416  | -4.7793675035 | H | -45.7735192855 | 7.6368227902  | -7.0032047833 |

|   |               |               |               |   |                |               |               |
|---|---------------|---------------|---------------|---|----------------|---------------|---------------|
| H | 15.4467700804 | 13.9778311022 | -3.2691977211 | C | -48.4187527631 | 2.2565228429  | -9.5986511455 |
| H | 17.6870705156 | 11.5496748045 | -6.0297928112 | H | -48.9581862457 | 1.3936854773  | -9.9946550372 |
| H | 15.8480041526 | 13.2132618903 | -5.5928591036 | H | -48.911636658  | 3.1797748475  | -9.9286521032 |
| C | 16.9296786737 | 13.1269559927 | -1.0243440603 | H | -47.3878312944 | 2.2459695313  | -9.9739123899 |
| C | 16.0304410889 | 14.0424824469 | -0.468731764  | C | -44.1281666674 | 2.3778432111  | -6.5773193035 |
| C | 17.8728952323 | 12.4857319356 | -0.1717497132 | C | -40.50665995   | 0.9932492601  | -5.9848247002 |
| C | 16.0229774907 | 14.3618658072 | 0.8752589256  | C | -41.2930624055 | -0.0394597974 | -6.4656277683 |
| C | 17.8784976273 | 12.8126587753 | 1.1869823331  | C | -42.6233615837 | 0.3371633734  | -6.7201411409 |
| C | 16.9644877259 | 13.7305965609 | 1.6783427707  | C | -42.8832771787 | 1.662769449   | -6.4388515753 |
| H | 15.3160107619 | 15.076501349  | 1.2783032057  | S | -41.4570436761 | 2.4552981545  | -5.8597464743 |
| H | 18.584759941  | 12.362210901  | 1.8765575144  | H | -40.9043382221 | -1.0363105149 | -6.6208869525 |
| N | 17.9893900833 | 11.8580844874 | -2.7011414673 | H | -43.3790437025 | -0.3486426993 | -7.0887660933 |
| N | 20.0556873304 | 10.5375221551 | 0.5539680319  | C | -50.1149186184 | 5.9602115646  | -7.0033347873 |
| F | 16.9785037671 | 14.0297549815 | 2.9836866898  | H | -51.0657299029 | 6.4749755862  | -7.0625216241 |
| F | 15.1197606513 | 14.6582872769 | -1.2464448146 | F | -38.9985009032 | 3.2110119806  | -4.9865959072 |
| F | 23.6333884964 | 12.8541445513 | 0.7356854235  | F | -20.3636738495 | 4.8419365376  | -0.4758262036 |
| F | 22.0471609232 | 15.186193835  | -2.9776923832 | F | -1.2940626651  | 2.9592541671  | 0.6182094914  |
| C | 10.9019891698 | 3.9598760552  | -0.5614166626 | F | 1.2296674809   | 2.9536371343  | 0.4741052526  |
| C | 10.1207666679 | 5.0662251617  | -0.1328732583 | F | -17.8703203616 | 4.8283141314  | -0.0814793393 |
| C | 8.1727095617  | 3.6918792926  | 0.0480852869  | F | -36.5527585292 | 3.1792189929  | -4.3538121008 |
| C | 8.9604180998  | 2.5814337423  | -0.3599205016 | C | -0.8795005942  | 2.1194358943  | 11.4018550745 |
| C | 10.311219404  | 2.6905931162  | -0.6547623174 | C | 0.2947181196   | 1.4387442685  | 12.0143325136 |
| C | 12.2481529523 | 4.3418758596  | -0.8474418617 | C | 1.4444257505   | 1.8976752399  | 11.1837967641 |
| H | 13.0032359409 | 3.6396827944  | -1.1819629958 | C | 1.0122010875   | 2.9914375909  | 10.3578567976 |
| C | 6.8122008394  | 3.3226970547  | 0.271860027   | C | -1.4878456197  | -1.6072958074 | 4.2696338146  |
| S | 8.0080703244  | 1.1277146149  | -0.4632199488 | C | -1.9536293948  | -2.6542266717 | 5.1510623967  |
| H | 6.0495940464  | 4.0286805345  | 0.5823375999  | C | -0.8095575648  | -3.4428866894 | 5.5531847969  |
| S | 11.0622027729 | 6.5297829889  | -0.0968315376 | C | 0.3637293723   | -2.8785459    | 4.922825039   |
| C | 8.7727769766  | 4.9532655618  | 0.18085906    | C | -0.0567159551  | -1.7460434905 | 4.1283249331  |
| C | 12.4939150648 | 5.6700438504  | -0.6438770321 | C | -0.4146697145  | 3.1288561881  | 10.4950294999 |
| O | 8.0474264063  | 6.045030828   | 0.565909425   | C | -2.0741061378  | 1.4748033705  | 11.1337104004 |
| O | 11.0295623126 | 1.6014414566  | -1.0637914278 | C | 0.1545789733   | -0.1595693922 | 12.1525228464 |
| C | 7.9809792657  | 6.2198897777  | 1.9757653141  | C | 2.4116828752   | 1.0404010275  | 10.6881386452 |
| H | 7.3859911444  | 7.1192178297  | 2.1464639962  | C | 1.6155715557   | 3.2513572667  | 9.124405271   |
| H | 7.496015083   | 5.3624136563  | 2.4590081985  | C | -2.0552139499  | -0.3365194762 | 4.347588878   |
| H | 8.9813689134  | 6.3568156168  | 2.4048539001  | C | -2.9666414879  | -2.3865267852 | 6.0684956931  |
| C | 11.7108174594 | 0.9395559467  | -0.0058443005 | C | -0.7280349576  | -3.9295069171 | 6.8547787597  |
| H | 12.2357198376 | 0.0953555515  | -0.4576686947 | C | 1.5667674002   | -2.8248174728 | 5.6223963633  |
| H | 12.4361967322 | 1.6065315854  | 0.4770530621  | C | 0.7459840516   | -0.6064773797 | 4.0718022563  |
| H | 11.0054982056 | 0.5691742826  | 0.7485025382  | C | -1.1852126711  | 3.5219296022  | 9.3979367281  |
| S | -0.0444282177 | -2.8781767102 | 0.5712626596  | C | -2.1970363363  | 0.0271585571  | 11.2677869681 |
| C | -1.5313070146 | 0.6164218957  | 0.6426817892  | C | 1.1889070535   | -0.96142555   | 11.4499578023 |
| C | 0.6716175117  | 1.7413652373  | 0.5119872921  | C | 3.0167765803   | 1.2832637538  | 9.4053635056  |
| C | -0.7407641486 | 1.7445118056  | 0.5929678948  | C | 0.812343731    | 3.6339095628  | 7.9887301256  |

|   |                |               |               |   |               |               |               |
|---|----------------|---------------|---------------|---|---------------|---------------|---------------|
| C | -0.7653762743  | -0.604067863  | 0.604959804   | C | -3.0959997771 | -0.0638698045 | 5.3063510075  |
| C | 0.6860116158   | -0.6075863976 | 0.5186235462  | C | -2.8729237185 | -2.8865309617 | 7.4181395401  |
| C | 1.457298408    | 0.6094795173  | 0.4677228712  | C | 0.5200786238  | -3.8663341801 | 7.5771163613  |
| N | 1.19664625     | -1.8349599301 | 0.489606469   | C | 2.3874906867  | -1.6397468724 | 5.5655078261  |
| N | -1.2816747016  | -1.8292976132 | 0.6379829224  | C | 0.1525729225  | 0.7053179509  | 4.1561070327  |
| C | 6.5662918528   | 1.9949220193  | 0.0517338341  | C | -1.2186120912 | 0.8366516326  | 4.2929155266  |
| C | 2.9020968242   | 0.633929059   | 0.3685667521  | C | -3.5439194991 | -1.0667570851 | 6.1489514674  |
| C | 3.7647204116   | -0.447694648  | 0.3188170461  | C | -1.7784801825 | -3.6450324409 | 7.8024375767  |
| C | 5.1175961005   | -0.0836561757 | 0.2044335532  | C | 1.6431708393  | -3.3233857011 | 6.9739613992  |
| C | 5.318298185    | 1.2808975502  | 0.1673946828  | C | 1.9850403138  | -0.5542265809 | 4.8061376751  |
| S | 3.8097528006   | 2.1242313058  | 0.2652670618  | C | -0.5587779675 | 3.7667907143  | 8.1223861589  |
| H | 3.4126120029   | -1.4687118334 | 0.3672073906  | C | -2.8553548811 | 1.8510190049  | 9.9843147503  |
| H | 5.9298853034   | -0.8018844812 | 0.1649587346  | C | -1.1218595697 | -0.7355545504 | 11.6632690626 |
| C | -11.0286569477 | 3.9841482997  | 0.8140831496  | C | 2.2821844782  | -0.4062036048 | 10.8233627457 |
| C | -10.1857642648 | 5.1164601217  | 0.9776747259  | C | 2.6383142754  | 2.3759511568  | 8.6401301281  |
| C | -8.2321402167  | 3.7400357207  | 0.9173883425  | C | -2.42925267   | 2.8650246949  | 9.1388329867  |
| C | -9.0760134458  | 2.6082952629  | 0.752991213   | C | -3.0598532769 | -0.4476516225 | 10.2127535531 |
| C | -10.4578852362 | 2.7079447263  | 0.6896047059  | C | 0.5620734195  | -2.1046590436 | 10.8467173614 |
| C | -12.4078248289 | 4.3458258041  | 0.8082155938  | C | 3.2788667488  | 0.0198646374  | 8.7645859485  |
| H | -13.2097215893 | 3.6192770755  | 0.7339896195  | C | 1.3601587896  | 3.0116858871  | 6.8071324011  |
| C | -6.8545619137  | 3.3716009282  | 0.9593172622  | C | -2.9129313942 | 1.2749986565  | 5.8177613392  |
| S | -8.1543413663  | 1.1356227151  | 0.6456805679  | C | -3.4093596866 | -1.8909963344 | 8.3154114529  |
| H | -6.0543882792  | 4.0865631537  | 1.1172743171  | C | 0.2354958923  | -3.563156397  | 8.95812115    |
| S | -11.1121192019 | 6.5855692009  | 1.1086564615  | C | 2.9796520155  | -1.426150865  | 6.8653093503  |
| C | -8.80240772    | 5.0188097536  | 1.0214272695  | C | 1.0338905201  | 1.5641004826  | 4.9150584818  |
| C | -12.6184824159 | 5.6909031412  | 0.948971023   | C | -1.7579549383 | 1.8335087383  | 5.1899763542  |
| O | -8.0255509138  | 6.1295007323  | 1.1929128153  | C | -3.8221770329 | -0.768835345  | 7.5344915755  |
| O | -11.2365570585 | 1.5947762164  | 0.5437119644  | C | -1.1804426258 | -3.4270077997 | 9.0964614856  |
| C | -7.5686976725  | 6.7021739195  | -0.0264355763 | C | 2.5218277727  | -2.4647576411 | 7.7320098553  |
| H | -6.9710727379  | 7.5736430453  | 0.2480434216  | C | 2.161298277   | 0.7851555489  | 5.3181565606  |
| H | -6.9471874518  | 5.9939825306  | -0.5885510224 | C | -1.4324924518 | 3.2821572689  | 7.0809187503  |
| H | -8.4108310473  | 7.0193603883  | -0.6539160462 | C | -3.4705124692 | 0.6721641579  | 9.429067948   |
| C | -11.5751367418 | 1.3062402571  | -0.8074734097 | C | -0.8513576671 | -1.9663270521 | 10.9805858843 |
| H | -12.1871258587 | 0.4023984277  | -0.7847684617 | C | 2.8224132735  | -1.0162639661 | 9.6329460411  |
| H | -12.1494609472 | 2.1265113748  | -1.2560729918 | C | 2.4868392467  | 2.2317927366  | 7.2097817975  |
| H | -10.6765644644 | 1.1241517779  | -1.4098608563 | C | -2.5864576113 | 2.7213172499  | 7.7091386579  |
| C | -6.6469913847  | 2.0253800416  | 0.8235371888  | C | -2.8944465648 | -1.7251543529 | 9.6243126842  |
| C | -2.9769033171  | 0.6480222637  | 0.7257757263  | C | 1.1268140291  | -2.7940388561 | 9.7426988056  |
| C | -3.8421363259  | -0.4278206019 | 0.8287145569  | C | 3.2377625716  | -0.12299709   | 7.3552947401  |
| C | -5.197209028   | -0.057591386  | 0.8757995117  | C | 0.5316427218  | 2.6058775496  | 5.7308658018  |
| C | -5.3974263765  | 1.3062125795  | 0.8111205352  | C | -0.9193456685 | 2.7458141833  | 5.8734124968  |
| S | -3.8852821278  | 2.1405743296  | 0.6867185576  | C | -3.7291203853 | 0.5501239214  | 8.0408642846  |
| H | -3.4899781568  | -1.4491485082 | 0.8686585485  | C | -1.7402213477 | -2.5163084767 | 10.0221503501 |
| H | -6.0094681981  | -0.7711090136 | 0.9676214906  | C | 2.3102491251  | -2.2288702532 | 9.1126103622  |

|   |                |               |               |   |               |               |               |
|---|----------------|---------------|---------------|---|---------------|---------------|---------------|
| S | -19.3430713926 | 10.4369706127 | 1.3423379737  | C | 2.8198206203  | 1.0255121271  | 6.5484654308  |
| C | -20.6861007574 | 7.0946317468  | 0.1331830156  | C | -3.2636348389 | 1.612980268   | 7.1472570676  |
| C | -18.4655814669 | 5.9970167756  | 0.1692103624  | C | 0.2878717007  | 0.7494281081  | 13.3547724125 |
| C | -19.8623917519 | 6.0048359826  | -0.0524982648 | C | -0.9659762301 | 0.9286185033  | 14.1807009987 |
| C | -19.9728578144 | 8.2596856319  | 0.5943979505  | C | 1.4750752847  | 0.7221334193  | 14.3286452084 |
| C | -18.5365334582 | 8.2515809779  | 0.8226770336  | C | -1.4152703673 | 2.2090586968  | 14.5098912861 |
| C | -17.7281717935 | 7.0779790049  | 0.6032882728  | C | -1.619624454  | -0.1786507148 | 14.7247580405 |
| N | -18.0760545038 | 9.4254046906  | 1.245267084   | H | 1.3712181945  | 1.6353452591  | 14.9317216532 |
| N | -20.5287936542 | 9.4391519568  | 0.8556625499  | H | 1.2613678544  | -0.1032402038 | 15.0228521179 |
| C | -16.2955185498 | 7.0426649098  | 0.8119524158  | C | 2.9255351808  | 0.6117039871  | 13.8722578654 |
| C | -15.4741952975 | 8.070093773   | 1.2439110376  | C | -2.5060116333 | 2.3799959155  | 15.3573935328 |
| C | -14.1186434058 | 7.7074710019  | 1.334651105   | H | -0.9104333721 | 3.077824781   | 14.094108541  |
| C | -13.8753796311 | 6.3969164634  | 0.9773303178  | C | -2.71046026   | -0.0099870203 | 15.5726339443 |
| S | -15.3441236413 | 5.6076838835  | 0.5116477168  | H | -1.2753196627 | -1.1799656371 | 14.4770770997 |
| H | -15.8578040525 | 9.0512757536  | 1.4873240749  | H | 3.0999746614  | -0.3084672408 | 13.3090603522 |
| H | -13.3387749631 | 8.3843451977  | 1.667736227   | H | 3.1978459248  | 1.4377402625  | 13.2099155867 |
| C | -29.8549793263 | 3.8764207703  | -2.5172914691 | C | 3.8503658601  | 0.6278967175  | 15.0825163065 |
| C | -28.9841330432 | 2.7537564574  | -2.5454226411 | C | -3.15749096   | 1.2702214641  | 15.8893619455 |
| C | -27.1466281636 | 4.0901586626  | -1.8054276067 | H | -2.8484423409 | 3.3823597792  | 15.5995673232 |
| C | -28.0187269349 | 5.2115460257  | -1.769112174  | H | -3.2131113837 | -0.8810913478 | 15.983957575  |
| C | -29.36162776   | 5.1250900703  | -2.1063364933 | H | 3.7283692034  | 1.5479483897  | 15.6696012655 |
| C | -31.1714619026 | 3.5365223347  | -2.9477490028 | H | 3.617953038   | -0.1928325832 | 15.7747919787 |
| H | -31.9737657025 | 4.2623490788  | -3.0250381229 | C | 5.3041664065  | 0.5097207142  | 14.6960547637 |
| C | -25.8167814269 | 4.4398403927  | -1.4294285799 | H | -4.0116352147 | 1.4025692331  | 16.547720631  |
| S | -27.1778000683 | 6.65579965    | -1.2795065245 | O | 5.7241391851  | 0.382798708   | 13.570321397  |
| H | -25.0011059605 | 3.7251666332  | -1.4112398483 | O | 6.0944400789  | 0.5615717508  | 15.7812757958 |
| S | -29.8084037317 | 1.3214397716  | -3.0925574355 | C | 7.4899440043  | 0.4523034788  | 15.512681322  |
| C | -27.6466217319 | 2.8354079841  | -2.1872624055 | H | 7.7165329906  | -0.5019214888 | 15.0291584595 |
| C | -31.3113598376 | 2.2167405618  | -3.2836685814 | H | 7.8221764884  | 1.2640221773  | 14.8597562028 |
| O | -26.8340207072 | 1.7384969361  | -2.2432349901 | H | 7.9836725443  | 0.5156265544  | 16.4826799146 |

**Table S28.** The coordinate of **11/PC<sub>71</sub>BM** (338 atoms).

| Atom | Coordinates (Angstroms) |              |              | Atom | Coordinates (Angstroms) |              |               |
|------|-------------------------|--------------|--------------|------|-------------------------|--------------|---------------|
|      | X                       | Y            | Z            |      | X                       | Y            | Z             |
| C    | 17.6090924627           | 6.2543797091 | 2.7448084304 | H    | -31.9802979198          | 8.0513667353 | -3.6137726377 |
| C    | 20.1068251645           | 5.9512919463 | 2.6078123629 | H    | -31.8908174965          | 7.1310593327 | -2.083139408  |
| C    | 18.780323925            | 5.6671453863 | 2.2357840595 | H    | -30.4596618948          | 8.024361518  | -2.6766038533 |
| C    | 16.2885222654           | 5.8281933803 | 2.191419243  | C    | -26.3495975731          | 6.0640001805 | -3.5987299652 |
| C    | 15.1388891308           | 6.0601258288 | 2.9558235897 | C    | -22.671479418           | 7.1487714954 | -4.5000187899 |
| C    | 13.8888922171           | 5.6701059246 | 2.502292366  | C    | -23.5420264118          | 8.0362997013 | -5.0824384383 |
| C    | 13.7355045141           | 5.0496248584 | 1.2533516827 | C    | -24.9008076181          | 7.7444785937 | -4.833107081  |
| C    | 14.8844659269           | 4.8525954409 | 0.4711629164 | C    | -25.1070264371          | 6.6355196992 | -4.0508765564 |
| C    | 16.1356561256           | 5.227092842  | 0.9348973307 | S    | -23.5721541661          | 5.9473216861 | -3.6159866126 |
| H    | 18.6475862839           | 4.9109329059 | 1.4752343339 | S    | -38.7747794958          | 0.7304516901 | 2.7357925655  |

|    |               |               |               |   |                |               |               |
|----|---------------|---------------|---------------|---|----------------|---------------|---------------|
| H  | 15.2474131056 | 6.5506042598  | 3.917664134   | C | -40.2675538265 | 1.6400485797  | -0.6195703438 |
| H  | 13.0188598836 | 5.8327366349  | 3.1335397711  | C | -38.0884898921 | 1.9816123589  | -1.7217939652 |
| H  | 14.7891339526 | 4.4264949312  | -0.5233158164 | C | -39.5081995467 | 1.9571750724  | -1.7212418885 |
| H  | 16.9957205044 | 5.0850664584  | 0.2877100253  | C | -39.5093898664 | 1.3157942904  | 0.554737515   |
| C  | 21.2169263266 | 5.1738503391  | 1.9753238935  | C | -38.0633422073 | 1.3562665253  | 0.5584328753  |
| C  | 21.032568165  | 3.907588329   | 1.4069446582  | C | -37.3177791163 | 1.6854734511  | -0.6222733711 |
| C  | 22.5018299142 | 5.7307993737  | 1.9737296967  | N | -37.5324733807 | 1.0597906904  | 1.741455998   |
| C  | 22.1014801483 | 3.2259666553  | 0.835244022   | N | -40.0275316806 | 0.9578235838  | 1.7263596812  |
| H  | 20.0568618732 | 3.4319828475  | 1.4366385561  | C | -35.8656043002 | 1.7055044102  | -0.6439267427 |
| C  | 23.567439677  | 5.0543477728  | 1.3927487093  | C | -34.9959108891 | 0.8270643714  | -0.0474086543 |
| H  | 22.6459387326 | 6.6995911517  | 2.441249793   | C | -33.6363462469 | 1.1607336789  | -0.2339378918 |
| C  | 23.3703002733 | 3.8001508672  | 0.8185315206  | C | -33.4288930417 | 2.292473335   | -0.9823786227 |
| H  | 21.9436553472 | 2.2396672478  | 0.4071863131  | S | -34.9632389907 | 2.9517138276  | -1.4609264608 |
| H  | 24.5563613625 | 5.5049332983  | 1.3915475237  | C | -49.7265509848 | -0.0341400747 | -3.685605683  |
| H  | 24.2037577828 | 3.2681170529  | 0.3675920256  | C | -48.8524014679 | -0.4280236016 | -4.7343207119 |
| O  | 17.5353689633 | 7.106719854   | 3.6867106348  | C | -46.9391064585 | 0.1861815931  | -3.4408009389 |
| O  | 20.4878357604 | 6.8519716563  | 3.4208496767  | C | -47.8123693535 | 0.5758795612  | -2.39086831   |
| Ir | 19.205794175  | 8.0749482547  | 4.6517244162  | C | -49.1927282268 | 0.4647696003  | -2.4894002063 |
| C  | 20.7834233526 | 8.8193986652  | 5.5952463676  | C | -51.1033591687 | -0.2138421759 | -4.0482767597 |
| C  | 21.4617893937 | 10.0057500885 | 5.3026656628  | H | -51.9309584058 | 0.0475219981  | -3.3992423407 |
| C  | 21.2678393498 | 8.0011970342  | 6.6554528862  | C | -45.5721787754 | 0.4101497115  | -3.1006210342 |
| C  | 22.5891469702 | 10.3528486154 | 6.0291650316  | S | -46.9367241201 | 1.2053085739  | -1.0244086281 |
| H  | 21.1280394634 | 10.6706277694 | 4.5131794391  | H | -44.7536616692 | 0.2009877175  | -3.7811924607 |
| C  | 22.4120607933 | 8.4038600701  | 7.3511576554  | S | -49.7422648665 | -1.001025132  | -6.1190895354 |
| C  | 23.0928055646 | 9.5700096742  | 7.0604161316  | C | -47.4702134386 | -0.336836119  | -4.6285498846 |
| H  | 23.9759650882 | 9.8582201932  | 7.6170981549  | O | -46.6552606128 | -0.7077687958 | -5.660355784  |
| C  | 20.4927190901 | 6.7990815249  | 6.9252276101  | O | -50.0025002408 | 0.8668940809  | -1.4642797272 |
| C  | 20.7291906025 | 5.8395747033  | 7.9184127333  | C | -46.2445309936 | -2.0683108686 | -5.6052046956 |
| C  | 19.8691165101 | 4.7622151763  | 8.0571815572  | H | -45.6116400209 | -2.2341880684 | -6.4792472564 |
| H  | 21.5830995224 | 5.9529848159  | 8.5709268481  | H | -45.6700733704 | -2.2712532472 | -4.6924331292 |
| C  | 18.5846345889 | 5.6149242457  | 6.2406945204  | H | -47.1069417068 | -2.7450786846 | -5.6454975922 |
| C  | 18.7717983792 | 4.6427277631  | 7.2073544246  | C | -50.3432452342 | -0.1778062326 | -0.5619988739 |
| H  | 20.0535918655 | 4.0197369272  | 8.8284710658  | H | -50.9750658126 | 0.2726601489  | 0.2061043453  |
| H  | 17.7516008779 | 5.5924093339  | 5.5468027099  | H | -50.8978671272 | -0.97591809   | -1.0715664715 |
| H  | 18.0731920413 | 3.8169667279  | 7.2861119185  | H | -49.4478178989 | -0.6045084736 | -0.0932594917 |
| C  | 18.1270622841 | 10.5573070316 | 3.5916579808  | C | -45.4050488493 | 0.9397964718  | -1.8500478861 |
| C  | 19.6521349373 | 9.575153834   | 2.1008744275  | C | -41.7196072012 | 1.6246558675  | -0.6363184261 |
| C  | 17.8992153264 | 11.5910658101 | 2.6741824273  | C | -42.5852226783 | 2.0599183749  | 0.3357531693  |
| C  | 19.4650327325 | 10.5745731243 | 1.1623487512  | C | -43.9459757247 | 1.8594516341  | 0.014875011   |
| H  | 20.3366346168 | 8.7487533186  | 1.9440089084  | C | -44.1588597637 | 1.2765650675  | -1.209260071  |
| C  | 18.5672119145 | 11.5973107856 | 1.4602650263  | S | -42.6283824871 | 0.9728260883  | -1.9726466807 |
| H  | 17.2027726771 | 12.378129077  | 2.9257798006  | C | -51.2488640864 | -0.719455072  | -5.2979127265 |
| H  | 20.0103766317 | 10.545719446  | 0.2254145849  | H | -52.175912368  | -0.9391390463 | -5.8125548563 |
| H  | 18.3892472864 | 12.399903523  | 0.7501359714  | F | -40.086440081  | 2.2643851091  | -2.8808412984 |



|   |               |               |               |   |                |               |               |
|---|---------------|---------------|---------------|---|----------------|---------------|---------------|
| C | 17.5393882792 | 10.4044696732 | 4.9147591411  | F | -20.9220350541 | 6.4583388256  | -2.3561338844 |
| C | 16.6209624576 | 11.2794982801 | 5.5031769285  | F | -1.549888461   | 4.1784481735  | -2.3204587514 |
| C | 17.969166793  | 9.2628093787  | 5.6493840292  | F | 0.9981362009   | 4.004916647   | -2.6039308942 |
| C | 16.1154853859 | 11.0896582887 | 6.7747030064  | F | -18.3603254981 | 6.4577104595  | -2.4795578366 |
| C | 17.4698374977 | 9.0704803179  | 6.9403767861  | F | -37.5220038787 | 2.3182459959  | -2.8789698967 |
| C | 16.563070669  | 9.9738174073  | 7.4705266801  | C | 0.5033361137   | 4.9872307782  | 8.3138928233  |
| H | 15.4057566069 | 11.7849062563 | 7.2058362041  | C | 1.5630893789   | 4.2241883303  | 9.028511197   |
| H | 17.7747544141 | 8.2240925429  | 7.546612067   | C | 2.7697333885   | 4.4058738465  | 8.1724858735  |
| N | 19.0035751383 | 9.5638192218  | 3.2733183493  | C | 2.5049951556   | 5.4410022169  | 7.2112180953  |
| N | 19.4172721027 | 6.6554771413  | 6.1009537886  | C | -0.6293333929  | 0.5396453966  | 1.6756642597  |
| F | 16.0897994062 | 9.7726844866  | 8.7072704437  | C | -1.2469164836  | -0.311968748  | 2.6675574842  |
| F | 16.1885558811 | 12.3636619771 | 4.8319288339  | C | -0.2313397229  | -1.2016579807 | 3.1871280397  |
| F | 22.8999694194 | 7.6477759992  | 8.3531371593  | C | 1.0138721355   | -0.8960702831 | 2.5172806799  |
| F | 23.2307081227 | 11.4905141781 | 5.7332134161  | C | 0.7663444659   | 0.1790121243  | 1.5832513929  |
| C | 10.7572107798 | 3.4616934638  | -0.391106348  | C | 1.113280548    | 5.7993730308  | 7.3010882338  |
| C | 9.9675814088  | 4.338718062   | 0.400812355   | C | -0.7726011407  | 4.4962291177  | 8.1021858481  |
| C | 7.9555052685  | 3.4580195461  | -0.5374826409 | C | 1.1882153025   | 2.6931524145  | 9.3580483008  |
| C | 8.7427358496  | 2.5722641423  | -1.3208430802 | C | 3.6020238454   | 3.362536291   | 7.8048456421  |
| C | 10.1291957321 | 2.5524856239  | -1.2553719258 | C | 3.1432222367   | 5.4567837628  | 5.9679142259  |
| C | 12.1531717948 | 3.6502381286  | -0.154930467  | C | -1.0037658237  | 1.8801756612  | 1.5876817364  |
| H | 12.9181759821 | 3.0660298775  | -0.6531673434 | C | -2.2115681279  | 0.2115492073  | 3.5245849998  |
| C | 6.562850568   | 3.285132445   | -0.785228311  | C | -0.2256610526  | -1.5309987878 | 4.5392714304  |
| S | 7.7543106159  | 1.5582878345  | -2.334465406  | C | 2.2100938138   | -0.9326052159 | 3.2294182837  |
| H | 5.7976003389  | 3.8737637617  | -0.2904258872 | C | 1.7278576647   | 1.1733376456  | 1.405502809   |
| S | 10.961581094  | 5.3661114008  | 1.3923922785  | C | 0.4112713203   | 6.1628811708  | 6.1492142716  |
| C | 8.5810029342  | 4.3476446547  | 0.3495565126  | C | -1.1080177253  | 3.1096211063  | 8.4083207599  |
| C | 12.42568331   | 4.6171266303  | 0.7712805254  | C | 2.095397115    | 1.6699078718  | 8.7776174838  |
| O | 7.8538343811  | 5.2169030084  | 1.1110981313  | C | 4.2392942307   | 3.3552150396  | 6.5147617592  |
| O | 10.8585914699 | 1.6969573115  | -2.0329552245 | C | 2.4076362983   | 5.8096239561  | 4.7782110022  |
| C | 7.4038107345  | 4.6660824543  | 2.3440015628  | C | -1.9971882558  | 2.4174704567  | 2.4834993185  |
| H | 6.834217772   | 5.4523460386  | 2.8431385932  | C | -2.1953526251  | -0.1263198303 | 4.9269807044  |
| H | 6.7547550361  | 3.7971946331  | 2.1788302529  | C | 1.0163877776   | -1.5618637753 | 5.274257915   |
| H | 8.2502356623  | 4.3695670723  | 2.9756775364  | C | 3.1965207533   | 0.1040243473  | 3.0461415327  |
| C | 11.1480928297 | 0.4566874265  | -1.3998710442 | C | 1.3338943877   | 2.5570289029  | 1.3186705401  |
| H | 11.718903083  | -0.1312962533 | -2.121401905  | C | -0.0037222371  | 2.9029724465  | 1.4093664179  |
| H | 11.7467206702 | 0.6061584946  | -0.4923662173 | C | -2.5882484201  | 1.6013193929  | 3.432716928   |
| H | 10.2275796796 | -0.0801277214 | -1.1393447947 | C | -1.2256594848  | -0.9827494703 | 5.4237502452  |
| S | -0.5937456536 | -1.6874397767 | -1.7838009751 | C | 2.2084494015   | -1.2663242771 | 4.6325296263  |
| C | -1.8618650602 | 1.8684543558  | -2.0088981008 | C | 2.9595185637   | 1.134609574   | 2.1522447987  |
| C | 0.3617018551  | 2.8516230322  | -2.412661159  | C | 1.0702414733   | 6.1554475856  | 4.8666453094  |
| C | -1.0458968658 | 2.9486297719  | -2.2469363132 | C | -1.4870356196  | 4.8376598384  | 6.8994775889  |
| C | -1.1879775238 | 0.6030494678  | -1.9727648703 | C | -0.1582438182  | 2.2529512976  | 8.9164245679  |
| C | 0.2454623144  | 0.5051156766  | -2.1349178047 | C | 3.2598779903   | 1.978161193   | 8.1108029825  |
| C | 1.055625909   | 1.6663654404  | -2.363600978  | C | 4.0274649175   | 4.3889113183  | 5.615047302   |

|   |                |               |               |   |               |               |               |
|---|----------------|---------------|---------------|---|---------------|---------------|---------------|
| N | 0.7020237754   | -0.7402288075 | -2.0363793233 | C | -0.9149717152 | 5.6673614966  | 5.9461540424  |
| N | -1.7777064775  | -0.573902323  | -1.7828549337 | C | -2.0277322651 | 2.6392049597  | 7.4005362651  |
| C | 6.2927302904   | 2.3092491359  | -1.7059416973 | C | 1.3087263618  | 0.5643341106  | 8.3057335761  |
| C | 2.5020653465   | 1.5889172087  | -2.473948618  | C | 4.3144798031  | 1.9978379009  | 6.0375463302  |
| C | 3.2590534258   | 0.6643434865  | -3.1473534146 | C | 2.8606699009  | 4.9735161731  | 3.6924376437  |
| C | 4.6503894291   | 0.8308495512  | -2.9654804636 | C | -1.6194546124 | 3.7678222774  | 2.8337904287  |
| C | 4.9904338281   | 1.8813128575  | -2.1497871903 | C | -2.5811884861 | 1.0397754996  | 5.685641641   |
| S | 3.5475276539   | 2.6899632281  | -1.6228049799 | C | 0.775989103   | -1.0529295058 | 6.6020000559  |
| C | -11.4553595328 | 4.7021973984  | -3.2429332473 | C | 3.8104410656  | 0.3875295088  | 4.3220882363  |
| C | -10.647634777  | 5.5314184873  | -4.0669161591 | C | 2.3300111808  | 3.3661467016  | 1.9847202928  |
| C | -8.6649897921  | 4.4287442206  | -3.3172358044 | C | -0.3928991621 | 4.0703149072  | 2.1675334092  |
| C | -9.4724592629  | 3.5992773303  | -2.493043446  | C | -2.8227709413 | 2.1050230952  | 4.7658157509  |
| C | -10.8550459667 | 3.7119223257  | -2.449957671  | C | -0.6051560365 | -0.6968902722 | 6.6939742884  |
| C | -12.8366422789 | 5.0357908213  | -3.3521518255 | C | 3.2015936522  | -0.458142873  | 5.2987095349  |
| H | -13.6110632821 | 4.5353981644  | -2.7806294255 | C | 3.3307241474  | 2.4867857072  | 2.5009048893  |
| C | -7.2795074941  | 4.12648722    | -3.1740308823 | C | 0.1377160447  | 5.678645964   | 3.8735789899  |
| S | -8.5109572806  | 2.4829375706  | -1.5659490337 | C | -2.2678000554 | 3.7018734134  | 6.478861796   |
| H | -6.4997999922  | 4.670731038   | -3.6961245264 | C | -0.0694900509 | 0.9215614028  | 8.3932286347  |
| S | -11.6012168153 | 6.6945848892  | -4.9423685148 | C | 3.7072435996  | 1.1541097293  | 7.0150149858  |
| C | -9.2671026959  | 5.4052011789  | -4.1256053718 | C | 3.8601741769  | 4.0934224526  | 4.2097521755  |
| C | -13.0780691052 | 6.0667088905  | -4.2201900091 | C | -1.0874096945 | 5.3726864338  | 4.5417247638  |
| O | -8.5162498285  | 6.2303307947  | -4.9132025387 | C | -2.0509984962 | 1.2886268982  | 6.9751608322  |
| O | -11.6060965479 | 2.9130448544  | -1.6355845417 | C | 1.7685138413  | -0.3307792568 | 7.3056859291  |
| C | -8.2746482547  | 5.7162374857  | -6.2177756661 | C | 4.2565043729  | 1.6893106122  | 4.6557047666  |
| H | -7.6762930374  | 6.466881414   | -6.7376047778 | C | 1.9840592026  | 4.5624344145  | 2.6570033755  |
| H | -7.719801755   | 4.7705654544  | -6.1736249959 | C | 0.56890821    | 4.9286558054  | 2.7511561003  |
| H | -9.2140139741  | 5.5577091421  | -6.761600709  | C | -2.537914457  | 3.4485806992  | 5.1107665861  |
| C | -12.0299843737 | 1.7026043713  | -2.2515856802 | C | -1.0270289124 | 0.3926799611  | 7.4904927812  |
| H | -12.6065223837 | 1.1607488728  | -1.4994106871 | C | 3.0233167398  | -0.0256472362 | 6.6354972745  |
| H | -12.6633145939 | 1.9049171044  | -3.1245810539 | C | 4.0143984446  | 2.7785877662  | 3.7067781869  |
| H | -11.1721304604 | 1.0935830626  | -2.5619981453 | C | -1.9194283532 | 4.3146045164  | 4.1049456962  |
| C | -7.0349388218  | 3.111607517   | -2.2885391124 | C | 1.4516282981  | 3.714798987   | 10.4428474527 |
| C | -3.2937254314  | 1.987894487   | -1.7943013004 | C | 0.237001662   | 4.1816442952  | 11.212902136  |
| C | -4.0674025572  | 1.3350801867  | -0.867937919  | C | 2.6206468221  | 3.6404610913  | 11.435927006  |
| C | -5.4413888618  | 1.6514143382  | -0.9532636729 | C | -0.0133299577 | 5.5461726807  | 11.3714094911 |
| C | -5.7521050735  | 2.5591085868  | -1.9348092177 | C | -0.5782028807 | 3.26241359    | 11.8761884486 |
| S | -4.3007338184  | 3.0181847962  | -2.7714638973 | H | 2.6800887047  | 4.6430840023  | 11.8829873851 |
| S | -19.9145568641 | 7.8808140422  | -8.0597781635 | H | 2.2689811662  | 2.9872527761  | 12.2471125643 |
| C | -21.2229969466 | 7.1292720752  | -4.5910082627 | C | 4.0256071994  | 3.203036906   | 11.037902475  |
| C | -18.9876231991 | 6.7905953573  | -3.6067601002 | C | -1.0671619837 | 5.9843811315  | 12.1679736579 |
| C | -20.40560856   | 6.7912463576  | -3.5382049101 | H | 0.6186208616  | 6.2700647202  | 10.8623680962 |
| C | -20.5289236319 | 7.4284826068  | -5.8110618834 | C | -1.6326579465 | 3.6984783647  | 12.6731246756 |
| C | -19.0844070301 | 7.4267074425  | -5.8815243525 | H | -0.3888551563 | 2.1975996328  | 11.7629250635 |
| C | -18.2753263824 | 7.1275369896  | -4.7339791544 | H | 4.0268203728  | 2.1881459901  | 10.631998622  |

|   |                |              |               |   |                |               |               |
|---|----------------|--------------|---------------|---|----------------|---------------|---------------|
| N | -18.6182911477 | 7.6667446806 | -7.1039517834 | H | 4.4399199605   | 3.8494682784  | 10.2598575954 |
| N | -21.1118129301 | 7.6706720735 | -6.981853187  | C | 4.9448311479   | 3.2463283933  | 12.2515151457 |
| C | -16.8249757693 | 7.1456745489 | -4.7829972529 | C | -1.8808833489  | 5.0609128993  | 12.8191599114 |
| C | -16.0127257428 | 8.0238042252 | -5.4573607332 | H | -1.2535812844  | 7.0492379276  | 12.2771881738 |
| C | -14.6368349562 | 7.7309521094 | -5.3373004535 | H | -2.2625076789  | 2.9715479803  | 13.1786071432 |
| C | -14.3576771675 | 6.6336484552 | -4.5612912267 | H | 4.99257966     | 4.2546157198  | 12.6841839842 |
| S | -15.8443944218 | 5.9528573807 | -3.9748906201 | H | 4.5743423378   | 2.5997863884  | 13.0586967972 |
| C | -30.6601724802 | 4.3711582601 | -2.3620269262 | C | 6.3522489787   | 2.8140106725  | 11.920629602  |
| C | -29.7789682487 | 3.469704949  | -1.7064111408 | H | -2.7063612112  | 5.4018191441  | 13.4379150614 |
| C | -27.874977058  | 4.6474244702 | -2.541761146  | O | 6.7379681339   | 2.4473855209  | 10.8358196894 |
| C | -28.756356268  | 5.5515429947 | -3.1934968767 | O | 7.1429468664   | 2.8861240461  | 13.0039796954 |
| C | -30.1367100704 | 5.4389765512 | -3.1073937068 | C | 8.4958659525   | 2.4933749814  | 12.7866209039 |
| C | -32.0253520845 | 4.0191602261 | -2.1544084513 | H | 8.5467652653   | 1.4545345615  | 12.4492415111 |
| H | -32.8495022    | 4.569684671  | -2.5954228194 | H | 8.9663501982   | 3.1307193206  | 12.0329616136 |
| C | -26.5095417788 | 4.9666244332 | -2.7958675537 | H | 8.9951524341   | 2.6075468244  | 13.7490584436 |
| S | -27.8876724592 | 6.7611602821 | -4.0942518874 | F | -44.9159651232 | 2.2323386917  | 0.8455848636  |
| H | -25.6846631459 | 4.380283147  | -2.4052896988 | F | -42.2332624845 | 2.6602329948  | 1.4613288069  |
| S | -30.647898801  | 2.2218322377 | -0.8594015965 | F | -35.3439291847 | -0.2681875127 | 0.6085739185  |
| C | -28.3986767392 | 3.5959271697 | -1.7735355684 | F | -32.662108147  | 0.4091389202  | 0.2717355451  |
| C | -32.1855923144 | 2.9059883138 | -1.3738212859 | F | -25.8749092551 | 8.5105177588  | -5.3166374465 |
| O | -27.5763016241 | 2.7027619302 | -1.1480688028 | F | -23.1918054575 | 9.1042106415  | -5.7806537104 |
| O | -30.9588632663 | 6.3120741806 | -3.760633789  | F | -16.4255913598 | 9.0854490631  | -6.1302173368 |
| C | -27.2149208519 | 3.0841407754 | 0.1743210192  | F | -13.7132982212 | 8.4864030187  | -5.9251308111 |
| H | -26.5701947714 | 2.2908181536 | 0.5573415661  | F | -6.3313732517  | 1.1112607195  | -0.1252322303 |
| H | -26.6674050295 | 4.0350848952 | 0.1755579182  | F | -3.6135979711  | 0.5161071634  | 0.0690347632  |
| H | -28.0996931968 | 3.1768087724 | 0.8160230405  | F | 2.7792929007   | -0.2907341328 | -3.9284153623 |
| C | -31.3369128544 | 7.4392913436 | -2.9788411314 | F | 5.5302920267   | 0.0196681854  | -3.5475204034 |
